# Supplementary material for: Evaluating manual versus automated benthic foraminiferal δ 18 O alignment techniques for developing chronostratigraphies in marine sediment records
Source: Copernicus journal article supplement (doi:10.5194/egusphere-2023-2906), 2023-12-19
Supplement: Supplementary file 1 [file HMM_match_SupplementalTables.xlsx]

## Sheet: TableS1_U1541_PS750592_splice
Table S1: Splicing of sediment cores PS75/059-2 and from IODP Site U1541 based on an alignment of high-resolution X-ray fluorescence (XRF) Fe intensity variations in both cores (Supplementary Figure S1).
Depth PS75/059-2 (m)	Depth U1541 (CCSF m)
0.22	0.22
1.61	1.37
2.01	1.79
2.47	2.1
3.11	2.74
4.05	3.49
4.28	3.63
4.96	4.19
5.42	4.55
6.41	5.33
7.72	6.44
8.21	6.94
8.49	7.19
9.27	7.98
9.54	8.18
10.21	8.79
10.57	9.16
11.21	9.74
12.81	11.84
13.03	12.21
13.26	12.46
13.77	13.1

## Sheet: TableS2_U1541_manual_tiepts
Table S2: User-defined Tie Points for Manual Alignment of IODP Site U1541 to LR04
Depth (m CCSF-A)	Age (ka)
0	0
0.5131	18
1.35	62
2.0052	85
2.85	109
3.3	123
3.54	140
4.36	185
5.2711	226
5.6043	240
5.899	252
6.7477	284
6.9466	294
7.438	317
7.638	329
8.1299	341
9.538	391
11.0068	404
11.938	419
12.3137	433
13.795	491
14.495	524
15.795	575
16.845	610
17.145	630
18.195	686
18.748	696
19.998	732
22.498	780
22.995	794
23.845	836
24.395	858
24.795	874
25.395	894
26.295	922
27.045	952
27.295	964
28.351	1004
29.001	1024
30.451	1072
31.051	1098
31.101	1108
31.351	1128
32.951	1198
34.801	1238
35.151	1248
36.301	1280
36.751	1290
37.401	1312
38.601	1352
39.201	1372
39.801	1398
40.351	1412
41.001	1436
41.301	1456
41.751	1468
42.351	1496
42.751	1520
43.051	1535
43.251	1547.5
43.751	1565
44.151	1587.5
44.754	1612.5
45.554	1655
45.954	1675
46.354	1702.5
46.804	1720
48.154	1795
48.954	1817.5
50.504	1862.5
51.401	1907.5
51.921	1937.5
53.371	2005
53.971	2025
54.321	2045
55.533	2072.5
56.683	2100
57.783	2152.5
58.333	2187.5
58.683	2225
58.933	2240
59.581	2260
60.581	2297.5
61.181	2320
61.381	2340
61.731	2357.5
63.044	2402.5
63.544	2432.5
65.494	2487.5
66.244	2520
67.154	2565
67.654	2600
68.354	2645
69.224	2715
69.824	2760
70.624	2805
71.124	2847.5
71.774	2877.5
72.224	2897.5
72.774	2932.5
73.436	2957.5
74.186	2980
74.536	3035
77.32	3140
78.07	3175
78.87	3205
79.37	3240
79.77	3265
80.52	3295
80.92	3320
81.57	3340
82.38	3375
82.68	3395
84.1	3440
84.45	3465
84.95	3485

## Sheet: TableS3_1090_manual_tiepts
Table S3: User-defined Tie Points for Manual Alignment of ODP Site 1090 to LR04 (this study)
Depth (mcd)	Age (ka)
0.03	0
0.6	18
2.5	62
3.17	84
3.92	96
4.01	109
4.47	126
6.3	192
6.87	230
7.086	238
7.906	270
8.356	296
8.91	325
9.0031	338.71
13.21	431
16.26	536
17.11	566
18.11	616.08
21.81	690
23.86	728
24.96	782.9
26.76	818
28.1	870
30.13	956
31.28	978
33.23	1048.8
34.13	1072
35.39	1126
36.33	1192.8
36.97	1249
37.62	1290
38.47	1336.6
39.12	1372.7
39.52	1412
40.37	1456
40.77	1490
41.02	1525.7
41.47	1565
42.07	1630
43.12	1732.5
43.42	1772.5
43.67	1795
44.17	1830
44.97	1862.5
45.07	1900
45.77	1940
46.52	1990
47.49	2042.5
47.69	2059.2
48.14	2087.5
48.94	2152.5
50.24	2197.5
50.74	2240
50.94	2295.1
51.84	2357.5
52.13	2382.5
52.58	2432.5
52.93	2470
53.68	2542.5
53.73	2577.1
55.03	2650
55.63	2687.5
56.08	2810
56.53	2879.8
57.33	2897.5

## Sheet: TableS4_980_981_manual_tiepts
Table S4: User-defined Tie Points for Manual Alignment of ODP Sites 980/981 to LR04
ODP Site 980			ODP Site 981
depth (mcd)	age (ka)		depth (mcd)	age (ka)
0.01	0		60.16	861
3.01	12		61.51	894
4.02	18		63.01	938
10.97	66		64.26	956
14.18	109		66.16	1004
17.44	126		67.65	1038
18.81	140		68.65	1068
20.72	167		70.09	1098
24.62	193		72.64	1132
28.02	223		75.49	1194
30.72	240		76.54	1214
36.78	283		78.9	1242
43.31	333		80.18	1280
44.61	341		80.9	1290
46.34	352		82.4	1308
51.91	394		83.35	1340
52.34	398		85.15	1383
57.6	426		85.6	1398
58.84	438		87.41	1437
62.82	474		89.56	1456
66.75	531		89.89	1470
71.18	583		91.99	1496
73.33	610		93.34	1522.5
82.69	696		95.14	1552.5
84.48	718		96.79	1572.5
85.53	746		98.43	1602.5
86.78	764		99.48	1620
88.63	788		101.1	1642.5
89.38	802		102.45	1682.5
90.47	818		104.7	1710
91.52	840		106.21	1747.5
93.81	858		107.21	1772.5
			109.31	1795
			109.9	1810

## Sheet: TableS5_U1541_alignments
Table S5: IODP Site U1541 Alignments of benthic foraminiferal δ18O
IODP Site U1541 Benthic foraminferal δ18O values are from this study and Ullerman et al. 2016.
HMM-Match-based alignments generated using the automated probabilistic HMM-Match algorithm of Lin et al. (2014) and user-defined tie points listed in Table 1. Manual alignment based on the user-defined tie points in Table S2.
Alignment targets refer to Prob-stack (Ahn et al., 2017), LR04 (Lisiecki and Raymo, 2005), LR09 Pacific (Lisiecki and Raymo, 2009), and CENOGRID (Westerhold et al. 2020).
													HMM-Match Alignment to Prob-stack				Manual Alignment to LR04		HMM-Match Alignment to LR04				HMM-Match Alignment to LR09 Pacific				HMM-Match Alignment to CENOGRID
Exp	Site	Hole	Core	Type	Sect	Sect depth top (cm) Ullermann16 data PS75/59: core depth top (m)	Sect depth bottom (cm) Ullermann16 data PS75/59: core depth bottom (m)	Top CSF-A (m) Ullermann16 data PS75/59: core depth top (m)	Top CCSF (m)	Data Source	Average Cib spp d18O (VPDB permil)		Output age (ka)	95% Confidence Upper Age Limit (ka)	95% Confidence Lower Age Limit (ka)		interp age (ka)		Output age (ka)	95% Confidence Upper Age Limit (ka)	95% Confidence Lower Age Limit (ka)		Output age (ka)	95% Confidence Upper Age Limit (ka)	95% Confidence Lower Age Limit (ka)		Output age (ka)	95% Confidence Upper Age Limit (ka)	95% Confidence Lower Age Limit (ka)
383	U1541	C	1	H	1	0	1	0	0	This study	2.883		0	0.3	0		0		0	0.3	0		0	0	0		0	0.3	0
383	U1541	C	1	H	1	5	6	0.05	0.05	This study	3.028		1.4	3.4	0.5		1.75404		1.2	1.4	0.6		0.5	0.5	0.5		0.8	1.7	0.5
			PS57/59-2			0.025	0.026	0.025	0.0599	ULLERMANN2016	2.81		1.7	4	0.8		2.10134		1.7	2.3	1.1		0.8	0.9	0.6		1.1	2	0.8
383	U1541	C	1	H	1	10	11	0.1	0.1	This study + ULLERMANN2016	3.001		2.9	5.5	1.7		3.50809		3.2	4	2.6		1.4	1.8	1.1		2.1	3.1	1.5
			PS57/59-2			0.125	0.126	0.125	0.1423	ULLERMANN2016	2.87		4.4	7	2.9		4.99201		4.9	5.3	4.4		2.1	2.4	1.7		3.2	4	2.4
383	U1541	C	1	H	1	15	16	0.15	0.15	This study	2.8685		4.9	7.5	3.1		5.26213		5.2	5.6	4.7		2.3	2.6	1.9		3.4	4.1	2.6
			PS57/59-2			0.175	0.176	0.175	0.1835	ULLERMANN2016	3.03		6.1	8.4	4.1		6.43734		6.6	7.5	5.6		3	3.2	2.6		4.4	4.9	3.4
383	U1541	C	1	H	1	20	21	0.2	0.2	This study	3.004		6.9	9	4.7		7.01618		7.2	8.2	6.1		3.4	3.5	3.1		4.7	5.3	3.8
			PS57/59-2			0.225	0.226	0.225	0.2247	ULLERMANN2016	2.92		7.8	9.6	5.6		7.88267		8.5	8.9	6.7		4.5	5.3	3.8		5.3	5.8	4.4
383	U1541	C	1	H	1	25	26	0.25	0.25	This study	2.8475		9	10.4	6.9		8.77022		9.2	9.5	8.5		6.1	6.5	5.4		6.1	6.4	5.2
			PS57/59-2			0.275	0.276	0.275	0.2659	ULLERMANN2016	3.43		9.8	11	7.8		9.32801		9.6	9.9	9.6		7.9	8.5	7.6		6.6	6.9	5.6
383	U1541	C	1	H	1	30	31	0.3	0.3	This study	3.029		11	12.2	9.2		10.5243		10.4	10.4	10.2		10.3	10.5	9.7		7.2	7.6	6.4
			PS57/59-2			0.325	0.326	0.325	0.3071	ULLERMANN2016	3.47		11.3	12.7	9.6		10.7733		10.5	10.7	10.5		10.6	10.9	10.6		7.3	7.8	6.6
383	U1541	C	1	H	1	35	36	0.35	0.35	This study+ULLERMANN2016	3.3095		12.7	13.9	10.8		12.2783		11.3	11.4	11		11.3	11.5	11		8.1	8.4	7.6
			PS57/59-2			0.425	0.426	0.425	0.3895	ULLERMANN2016	4.18		14.2	15	11.9		13.664		12.1	12.2	11.6		12.1	12.3	11.7		9	9.3	8.5
383	U1541	C	1	H	1	40	41	0.4	0.4	This study	3.336		14.8	15.4	12.4		14.0324		12.4	12.4	12.1		12.5	12.5	12.1		9.3	9.5	9
			PS57/59-2			0.475	0.476	0.475	0.4307	ULLERMANN2016	4.04		15.9	16.6	13.7		15.1093		13.6	13.9	13.6		13.6	14	13.6		10.4	11.1	9.8
383	U1541	C	1	H	1	45	46	0.45	0.45	This study	3.827		16.5	17.6	14.8		15.7864		14.2	14.3	13.9		14.4	14.5	14		10.8	11.8	10.4
			PS57/59-2			0.525	0.526	0.525	0.4719	ULLERMANN2016	4.08		17.7	19.1	16		16.5547		14.8	15	14.5		15.2	15.5	14.7		11.8	12.4	11
383	U1541	C	1	H	1	50	51	0.5	0.5	This study	4.195		19.2	20.8	17.4		17.5404		15.3	15.4	15.1		16.4	17.1	15.7		12.5	13.4	11.9
			PS57/59-2			0.575	0.576	0.575	0.5131	ULLERMANN2016	4.42		20.1	22	18.2		18		15.6	16.5	15.6		17.7	18.4	16.7		13.3	15	12.5
383	U1541	C	1	H	1	55	56	0.55	0.55	This study+ULLERMANN2016	4.33267		23.5	26.3	20.3		19.94		16.5	21.8	16.3		20.2	20.5	19.6		18	19.8	13.4
383	U1541	C	1	H	1	60	61	0.6	0.6	This study+ULLERMANN2016	4.385		28.2	30.8	25.2		22.5688		23.8	28.7	23.5		27.3	28.1	25.8		21.8	24.7	19.5
			PS57/59-2			0.725	0.726	0.725	0.6367	ULLERMANN2016	4.28		30.8	33.1	28.2		24.4983		28.5	32.1	28.2		31	32.3	29.6		24.4	27.6	21.8
383	U1541	C	1	H	1	65	66	0.65	0.65	This study	4.225		31.6	34	29.2		25.1975		30.1	33	29.6		32	33.6	30.4		25.2	28.7	22.6
			PS57/59-2			0.775	0.776	0.775	0.6779	ULLERMANN2016	4.21		33.6	35.9	31.3		26.6644		34	35.1	33		34.6	36.2	32.2		27.2	30.8	24.7
383	U1541	C	1	H	1	70	71	0.7	0.7	This study	4.128		35	36.6	32.7		27.8263		36.5	37.4	35.6		35.7	38.5	33.4		28.5	32.1	25.9
			PS57/59-2			0.825	0.826	0.825	0.7191	ULLERMANN2016	4.27		36.3	37.5	34.2		28.8304		39.1	39.8	38.6		36.5	40.6	35.9		30.2	33.9	27.5
383	U1541	C	1	H	1	75	76	0.75	0.75	This study	3.642		38	38.5	37.5		30.455		40.6	41.1	40.6		40.7	41.2	40.6		32.1	35.9	29.2
			PS57/59-2			0.875	0.876	0.875	0.7603	ULLERMANN2016	4.3		38.5	39.5	37.9		30.9965		40.9	41.4	40.6		41.2	41.5	40.8		32.7	36.3	29.6
383	U1541	C	1	H	1	80	81	0.8	0.8	This study+ULLERMANN2016	4.1365		40.4	42.9	39.1		33.0838		42	42.6	41.4		42.2	43	41.5		34.6	38.6	31.7
			PS57/59-2			0.975	0.976	0.975	0.8427	ULLERMANN2016	4.14		42.6	45.2	40.3		35.3287		42.9	44	42.1		43.3	44.2	42.5		36.9	40.8	33.3
383	U1541	C	1	H	1	85	86	0.85	0.85	This study	4.157		43	45.6	40.6		35.7125		43	44.3	42.3		43.5	44.5	42.7		37.4	41.2	33.7
			PS57/59-2			1.025	1.026	1.025	0.8839	ULLERMANN2016	4.14		44.6	47	42		37.4948		43.8	47	43		44.1	45.6	43.5		38.9	42.6	35.1
383	U1541	C	1	H	1	90	91	0.9	0.9	This study	4.14		45.3	47.9	42.9		38.3413		44.4	47.8	43.5		44.5	46	44		39.8	43.3	35.7
			PS57/59-2			1.075	1.076	1.075	0.9251	ULLERMANN2016	4.1		46.6	49.6	44.1		39.6609		46.4	48.5	44.3		45.5	46.7	44.7		41.1	44.9	36.9
383	U1541	C	1	H	1	95	96	0.95	0.95	This study	4.096		47.8	50.8	45.5		40.97		47.9	49.3	45.2		46.5	47.4	45.5		42.4	46.4	38.2
			PS57/59-2			1.125	1.126	1.125	0.9663	ULLERMANN2016	4.09		48.7	51.6	46.1		41.827		48.8	50.1	45.8		47.3	48.2	46.4		43.3	47.6	39.1
383	U1541	C	1	H	1	100	101	1	1	This study	3.946		50.4	53.6	47.8		43.5988		50.4	52.4	47.2		49.2	50	48		45.2	49.3	40.6
			PS57/59-2			1.175	1.176	1.175	1.0075	ULLERMANN2016	4.1		50.8	54	48.2		43.9931		50.7	52.7	47.6		49.8	50.5	48.4		45.6	49.6	41.1
383	U1541	C	1	H	1	105	106	1.05	1.05	This study+ULLERMANN2016	4.0165		52.8	56	50.4		46.2275		52.4	53.9	49.6		51.9	52.6	50.4		47.9	51.6	42.9
			PS57/59-2			1.275	1.276	1.275	1.09	ULLERMANN2016	4		54.5	58	52		48.3305		53.7	54.6	51		53.7	54.1	51.9		49.9	53.1	44.9
383	U1541	C	1	H	1	110	111	1.1	1.1	This study	3.987		54.9	58.5	52.7		48.8563		54	54.8	51.1		54.2	54.5	52.4		50.4	53.6	45.5
			PS57/59-2			1.325	1.326	1.325	1.1312	ULLERMANN2016	3.9		56.6	60.1	54		50.4966		54.8	55.4	52		55.6	56.4	54.7		52.4	55.1	47.2
383	U1541	C	1	H	1	115	116	1.15	1.15	This study	3.975		57.4	61.1	54.9		51.485		55.3	55.9	53.6		56.5	57.4	55.6		53.1	56	47.8
			PS57/59-2			1.375	1.376	1.375	1.1724	ULLERMANN2016	3.99		58.6	62.1	55.7		52.6627		55.7	56.5	54.9		57.5	58.6	56.3		54.2	57.1	49
383	U1541	C	1	H	1	120	121	1.2	1.2	This study	3.943		60	63.5	56.9		54.1138		56.5	57.8	56		58.9	60	57.2		55.6	58.5	50.4
			PS57/59-2			1.425	1.426	1.425	1.2136	ULLERMANN2016	4.17		60.7	64.1	57.5		54.8288		56.8	58.5	56.6		59.8	61.1	57.6		56.3	59.2	51.3
383	U1541	C	1	H	1	125	126	1.25	1.25	This study+ULLERMANN2016	4.106		62.4	65.8	58.9		56.7425		58	61.4	57.4		61.7	63.3	58.3		58	61.2	53.4
383	U1541	C	1	H	1	130	131	1.3	1.3	This study+ULLERMANN2016	4.03		64.4	67.8	60.6		59.3713		59.4	64.3	58.8		64.3	65.8	59.3		60	63.8	56.5
			PS57/59-2			1.575	1.576	1.575	1.3372	ULLERMANN2016	4.09		66.1	69.1	62.3		61.327		61.4	65.5	60.6		66.1	67.7	60.2		61.8	65.6	58.6
383	U1541	C	1	H	1	135	136	1.35	1.35	This study	4.171		66.7	69.9	62.9		62		62.9	66.2	61.1		66.8	68.4	60.6		62.6	66.4	59.4
			PS57/59-2			1.625	1.626	1.625	1.381	ULLERMANN2016	4.04		68.1	71	64.3		63.0882		64.4	67.3	63.6		68.2	69.5	61.2		64.4	67.6	61.1
383	U1541	C	1	H	1	140	141	1.4	1.4	This study	4.125		69.1	71.7	65.5		63.7552		65.5	68.1	64.6		69	70.2	61.7		65.6	68.2	62.6
			PS57/59-2			1.675	1.676	1.675	1.4341	ULLERMANN2016	4.01		71	72.8	67.2		64.9522		67.8	69	66.5		70.3	71.1	62.4		67.8	69.4	64.9
383	U1541	C	1	H	1	145	146	1.45	1.45	This study	4.094		71.9	73.6	67.9		65.5104		68.7	69.4	67.3		70.9	71.5	62.9		68.5	70.1	66.2
			PS57/59-2			1.725	1.726	1.725	1.4872	ULLERMANN2016	4.06		73.3	74.8	69.8		66.8162		70.1	70.4	69		72.2	72.5	63.7		69.9	71.4	68.2
383	U1541	C	1	H	2	1	2	1.5	1.5	This study	3.662		73.7	75.2	70.5		67.2656		70.5	70.8	70.5		72.6	72.9	64.3		70.5	72	68.8
			PS57/59-2			1.775	1.776	1.775	1.5403	ULLERMANN2016	3.82		74.9	76.6	72		68.6803		71.1	72.3	71		73.2	73.4	67.7		72.2	73.7	70.2
383	U1541	C	1	H	2	6	7	1.55	1.55	This study	4.163		75.1	77.1	72.3		69.0208		71.4	72.8	71.1		73.4	73.5	68.2		72.5	74	70.5
			PS57/59-2			1.825	1.826	1.825	1.5934	ULLERMANN2016	3.8		76.5	78.3	74		70.5443		73.3	75.7	72.7		74.7	75.5	74.1		74	75.4	71.9
383	U1541	C	1	H	2	11	12	1.6	1.6	This study	3.684		76.6	78.6	74.3		70.7759		73.9	76.2	73.6		74.8	75.9	74.4		74.3	75.7	72.2
383	U1541	C	1	H	2	16	17	1.65	1.65	This study+ULLERMANN2016	3.7765		78	80	75.9		72.5311		76.6	77.4	75.6		76.1	77.7	75.4		75.7	77.2	73.9
383	U1541	C	1	H	2	21	22	1.7	1.7	This study+ULLERMANN2016	3.61067		79.4	81.1	77.2		74.2863		78.6	79.1	77.2		77.3	78.9	76.9		77.1	78.6	75.4
383	U1541	C	1	H	2	26	27	1.75	1.75	This study+ULLERMANN2016	3.497		80.6	82.3	78.6		76.0415		79.5	80.3	78.6		78.7	79.8	78.6		78.3	79.8	76.5
383	U1541	C	1	H	2	31	32	1.8	1.8	This study+ULLERMANN2016	3.495		81.7	83.5	79.8		77.7967		80.3	81.1	79.7		79.7	80.4	79.4		79.5	81.2	77.8
			PS57/59-2			2.075	2.076	2.075	1.8343	ULLERMANN2016	3.58		82.6	84.4	80.6		79.0008		81.1	81.7	80.3		80.3	81	80		80.6	82.3	78.6
383	U1541	C	1	H	2	36	37	1.85	1.85	This study	3.471		83	84.9	81.2		79.5519		81.4	82.1	80.6		80.5	81.4	80.2		81.1	82.7	79.2
			PS57/59-2			2.125	2.126	2.125	1.8685	ULLERMANN2016	3.49		83.5	85.5	81.5		80.2013		81.8	82.4	80.9		81.1	81.8	80.5		81.5	83.2	79.8
383	U1541	C	1	H	2	41	42	1.9	1.9	This study+ULLERMANN2016	3.5875		84.6	86.5	82.4		81.3071		82.6	83	81.5		81.9	82.4	81.2		82.4	84.3	80.9
			PS57/59-2			2.225	2.226	2.225	1.9368	ULLERMANN2016	3.43		85.5	87.5	83.5		82.5989		83	83.6	82.3		82.7	83.1	81.9		83.6	85.2	82
383	U1541	C	1	H	2	46	47	1.95	1.95	This study	3.598		85.9	87.8	84		83.0623		83.3	84	82.6		83	83.5	82.3		84	85.5	82.4
			PS57/59-2			2.275	2.276	2.275	1.971	ULLERMANN2016	3.39		86.5	88.5	84.7		83.7995		83.8	84.4	83.2		83.4	84	82.7		84.7	86.2	83.3
383	U1541	C	1	H	2	51	52	2	2	This study	3.369		87.5	89.4	85.6		84.8175		84.4	85.3	84		84.1	84.7	83.4		85.8	87.2	84.3
			PS57/59-2			2.325	2.326	2.325	2.0052	ULLERMANN2016	3.51		87.5	89.6	85.8		85		84.4	85.5	84.1		84.3	84.8	83.5		86.1	87.5	84.6
			PS57/59-2			2.375	2.376	2.375	2.0394	ULLERMANN2016	3.75		88.7	90.8	86.9		85.9716		85.8	87.6	85.2		85.2	85.9	84.6		87.5	91.3	86.1
383	U1541	C	1	H	2	56	57	2.05	2.05	This study	3.738		89.1	91.3	87.3		86.2727		86.2	88.2	85.5		85.5	86.3	84.8		88.1	92.2	86.5
			PS57/59-2			2.425	2.426	2.425	2.0736	ULLERMANN2016	3.65		89.9	92	88.1		86.9432		87.6	89	86.1		86.1	87	85.3		89.3	93.3	87.3
383	U1541	C	1	H	2	61	62	2.1	2.1	This study	3.6625		90.8	93	89.1		87.6932		88.5	89.9	87		86.8	87.7	85.9		91.9	94.5	88.2
			PS57/59-2			2.475	2.476	2.475	2.1099	ULLERMANN2016	3.77		91.1	93.3	89.3		87.9744		88.8	90.2	87.3		87.1	88	86.2		92.3	95.1	88.5
383	U1541	C	1	H	2	66	67	2.15	2.15	This study	3.677		92.3	94.3	90.5		89.1136		89.9	91.1	88.5		88	88.9	87.1		94.2	96.5	91.1
			PS57/59-2			2.525	2.526	2.525	2.1594	ULLERMANN2016	3.74		92.7	94.8	91		89.3807		90.4	91.4	89		88.2	89.1	87.3		94.9	97.1	91.9
383	U1541	C	1	H	2	71	72	2.2	2.2	This study	3.6605		93.7	95.9	92		90.5341		91.6	92.5	90.1		89.3	89.7	88.6		96.6	98.6	93.7
			PS57/59-2			2.575	2.576	2.575	2.2089	ULLERMANN2016	3.6		93.9	96.2	92.2		90.7869		92	92.8	90.4		89.5	89.9	88.8		96.9	98.9	94.2
383	U1541	C	1	H	2	76	77	2.25	2.25	This study	3.548		95.1	97.4	93.6		91.9545		93.6	96.6	91.6		90.2	90.4	89.7		98.5	100.4	96.8
			PS57/59-2			2.625	2.626	2.625	2.2584	ULLERMANN2016	3.46		95.2	97.5	93.7		92.1932		94.2	96.8	91.6		90.4	90.5	90		98.8	100.7	97.4
383	U1541	C	1	H	2	81	82	2.3	2.3	This study	3.745		96.3	98.9	94.8		93.375		97.5	98.1	92.2		92.3	92.7	91.5		100.3	102	98.8
			PS57/59-2			2.675	2.676	2.675	2.3079	ULLERMANN2016	3.63		96.5	99.2	95.1		93.5994		97.8	98.5	92.3		92.8	93.5	91.9		100.7	102.3	99.2
383	U1541	C	1	H	2	86	87	2.35	2.35	This study	3.45833		97.8	100.3	96.2		94.7955		98.9	100	93.6		94.8	96	93.8		102.3	103.6	100.7
			PS57/59-2			2.725	2.726	2.725	2.3573	ULLERMANN2016	3.48		98.1	100.6	96.3		95.0028		99.1	100.3	93.9		95.2	96.4	94.2		102.7	104.1	101
383	U1541	C	1	H	2	91	92	2.4	2.4	This study	3.486		99.7	101.8	97.2		96.2159		100.1	101.7	94.9		96.8	97.9	95.4		104.6	106.1	102.6
			PS57/59-2			2.775	2.776	2.775	2.4068	ULLERMANN2016	3.46		100	102.1	97.4		96.4091		100.3	102	95.2		97.2	98.3	95.7		105	106.5	102.9
383	U1541	C	1	H	2	96	97	2.45	2.45	This study	3.594		101.2	103.3	98.6		97.6364		101.4	103	96.6		98.5	99.5	97.2		106.5	108.1	104.6
			PS57/59-2			2.825	2.826	2.825	2.4563	ULLERMANN2016	3.42		101.4	103.3	98.8		97.8153		101.5	103.2	96.8		98.8	99.9	97.5		106.5	108.2	104.6
383	U1541	C	1	H	2	101	102	2.5	2.5	This study	3.5125		102.7	104.6	100.1		99.0568		103	104.6	98.5		100.3	101.5	98.9		108.2	109.6	105.9
			PS57/59-2			2.875	2.876	2.875	2.5058	ULLERMANN2016	3.45		102.7	104.6	100.1		99.2216		103.2	104.6	98.6		100.5	101.8	99.1		108.4	109.7	105.9
383	U1541	C	1	H	2	106	107	2.55	2.55	This study	3.535		104.1	106.1	101.2		100.477		104.6	105.3	99.8		101.7	103.4	100.6		109.7	111.1	107.5
			PS57/59-2			2.925	2.926	2.925	2.5553	ULLERMANN2016	3.47		104.3	106.2	101.4		100.628		104.7	105.5	100		101.8	103.6	100.8		109.9	111.1	107.6
383	U1541	C	1	H	2	111	112	2.6	2.6	This study+ULLERMANN2016	3.6415		105.3	107.3	102.6		101.898		105.8	106.4	101		102.9	104.5	101.9		111	112.3	109
383	U1541	C	1	H	2	116	117	2.65	2.65	This study+ULLERMANN2016	3.582		106.7	108.5	103.9		103.318		107	107.5	102.1		103.8	106	103		112.3	113.4	110.1
383	U1541	C	1	H	2	121	122	2.7	2.7	This study+ULLERMANN2016	3.78533		107.9	109.6	105.2		104.739		108.2	109	103.6		104.5	107.1	104.1		113.7	114.9	111.3
383	U1541	C	1	H	2	126	127	2.75	2.75	This study+ULLERMANN2016	3.5295		109.3	110.7	106.5		106.159		109.6	110.1	104.7		106.1	107.9	105.6		115.1	116.5	112.3
			PS57/59-2			3.175	3.176	3.175	2.7908	ULLERMANN2016	3.58		110.5	111.6	107.8		107.318		110.2	110.8	105.6		107.3	108.5	106.6		116.2	117.5	113.3
383	U1541	C	1	H	2	131	132	2.8	2.8	This study	3.714		110.7	111.7	107.9		107.58		110.4	111	105.9		107.5	108.7	106.9		116.5	117.7	113.6
			PS57/59-2			3.225	3.226	3.225	2.8305	ULLERMANN2016	3.66		111.6	112.6	109.3		108.446		111	111.6	107		108.4	109.3	107.9		117.5	118.6	114.9
383	U1541	C	1	H	2	136	137	2.85	2.85	This study	3.846		112.2	113.1	109.9		109		111.3	112	107.6		108.9	109.5	108.6		118	119.1	115.7
			PS57/59-2			3.275	3.276	3.275	2.8702	ULLERMANN2016	3.77		112.8	113.7	110.7		109.628		111.7	112.5	108.7		109.5	110.5	109		118.6	119.5	116.5
383	U1541	C	1	H	2	141	142	2.9	2.9	This study	3.667		113.7	114.5	111.7		110.556		112.5	113.1	110.1		110.8	112.1	109.7		119.5	120.3	117.7
			PS57/59-2			3.325	3.326	3.325	2.9098	ULLERMANN2016	3.62		113.9	114.6	112		110.86		112.6	113.4	110.5		111.5	112.5	110.1		119.7	120.4	118.1
383	U1541	C	1	H	2	146	147	2.95	2.95	This study+ULLERMANN2016	3.465		115.1	115.9	113.4		112.111		113.7	114.3	112.6		113.1	114	111.3		120.7	121.3	119.5
			PS57/59-2			3.425	3.426	3.425	2.9892	ULLERMANN2016	3.44		116	116.9	114.8		113.331		114.6	115.2	114		114.6	115.2	113.6		121.8	122.3	120.9
383	U1541	C	1	H	3	1	2	3	3	This study	3.436		116.3	117.2	115.1		113.667		115.1	115.4	114.3		115.2	115.5	114.1		122	122.4	121.2
			PS57/59-2			3.475	3.476	3.475	3.0289	ULLERMANN2016	3.02		117.2	118	116.2		114.566		117.5	117.8	116.6		117.6	118	116.6		122.7	123.2	122.1
383	U1541	C	1	H	3	6	7	3.05	3.05	This study	3.433		118	118.4	116.8		115.222		118.3	118.4	117.2		118.3	118.5	117.4		123.3	123.6	122.9
			PS57/59-2			3.525	3.526	3.525	3.0686	ULLERMANN2016	2.98		118.6	119.2	117.5		115.801		118.9	119.4	118		118.9	119.4	118.2		123.8	124.2	123.5
383	U1541	C	1	H	3	11	12	3.1	3.1	This study	2.885		119.4	120.1	118.4		116.778		119.8	120.4	119.1		119.9	120.5	119.6		124.6	125	123.9
			PS57/59-2			3.575	3.576	3.575	3.1083	ULLERMANN2016	2.91		119.7	120.4	118.6		117.036		120.1	120.7	119.4		120.2	120.8	119.8		124.7	125.2	124.2
383	U1541	C	1	H	3	16	17	3.15	3.15	This study+ULLERMANN2016	2.9715		120.7	121.7	119.7		118.333		121.2	121.5	120.4		121.3	121.8	120.9		125.6	126.1	125
			PS57/59-2			3.675	3.676	3.675	3.1876	ULLERMANN2016	2.88		122	122.7	120.6		119.503		122.4	122.6	121.8		122.3	122.5	122.1		126.4	126.7	125.8
383	U1541	C	1	H	3	21	22	3.2	3.2	This study	2.753		122.1	122.9	120.9		119.889		122.6	122.9	122.1		122.7	123	122.6		126.5	126.8	125.9
			PS57/59-2			3.725	3.726	3.725	3.2273	ULLERMANN2016	2.72		123.2	123.8	121.7		120.738		123.5	123.5	123		123.3	123.7	123		127	127.3	126.5
383	U1541	C	1	H	3	26	27	3.25	3.25	This study	2.942		123.8	124.6	122.3		121.444		124.1	124.2	123.6		123.9	124.6	123.6		127.5	127.8	127
			PS57/59-2			3.775	3.776	3.775	3.267	ULLERMANN2016	2.78		124.2	125.2	122.9		121.973		124.6	124.7	124.1		124.3	124.9	123.9		127.8	128.1	127.3
383	U1541	C	1	H	3	31	32	3.3	3.3	This study	2.593		125.2	126.2	123.9		123		125	125.5	124.7		124.9	125.3	124.6		128.2	128.4	127.8
			PS57/59-2			3.825	3.826	3.825	3.3067	ULLERMANN2016	2.77		125.3	126.5	124.2		123.475		125.2	125.6	124.9		125.1	125.5	124.8		128.2	128.5	127.9
383	U1541	C	1	H	3	36	37	3.35	3.35	This study+ULLERMANN2016	2.893		126.5	127.8	125.5		126.542		125.8	126.1	125.5		125.7	126.1	125.3		128.8	129.1	128.5
			PS57/59-2			3.925	3.926	3.925	3.386	ULLERMANN2016	2.78		127.5	128.8	126.2		129.092		126.4	126.4	126.1		126.4	126.5	126.2		129.4	129.7	129.1
383	U1541	C	1	H	3	41	42	3.4	3.4	This study	3.016		128.4	129.4	126.8		130.083		126.7	126.8	126.5		126.7	126.9	126.6		129.7	130	129.4
			PS57/59-2			3.975	3.976	3.975	3.4257	ULLERMANN2016	2.82		129.7	130.5	127.9		131.904		127.5	127.5	127		127.4	127.5	127.1		130.4	130.4	130
			PS57/59-2			4.025	4.026	4.025	3.4654	ULLERMANN2016	3.92		132	133.3	130.5		134.716		132	132.5	131.6		132.8	133.4	131.7		132.8	133.4	132.3
383	U1541	B	1	H	3	1	2	3	3.49	This study	4.157		133.7	134.6	132		136.458		133.3	133.4	132.8		134.1	134.5	133.6		133.9	134.8	133.3
			PS57/59-2			4.075	4.076	4.075	3.5017	ULLERMANN2016	4.32		134.2	135.2	132.5		137.287		133.6	134.2	133.6		134.9	135.4	134.6		134.3	135.4	133.6
			PS57/59-2			4.125	4.126	4.125	3.533	ULLERMANN2016	4.17		136	137.2	134		139.504		134.5	137.4	134.3		136.3	136.5	135.9		136.2	139.1	134.5
383	U1541	B	1	H	3	6	7	3.05	3.54	This study	4.636		136.3	137.5	134.2		140		134.8	137.8	134.6		136.9	137.5	136.6		136.5	139.4	134.8
			PS57/59-2			4.175	4.176	4.175	3.5644	ULLERMANN2016	4.57		137.7	138.4	135.1		141.339		138.3	140.1	138		139.2	140.5	138.6		138.4	141	135.8
383	U1541	B	1	H	3	11	12	3.1	3.59	This study	3.936		139.1	139.5	136.2		142.744		141.8	142.3	141.6		141.8	142.5	141.6		141.6	142.4	136.9
			PS57/59-2			4.225	4.226	4.225	3.5957	ULLERMANN2016	4.41		139.5	140.6	136.6		143.057		142.3	142.9	142		142.2	142.7	141.9		142	142.9	137.4
			PS57/59-2			4.275	4.276	4.275	3.627	ULLERMANN2016	4.55		140.9	143.3	138.3		144.774		143.8	146.7	143.2		143.7	144	143.4		142.9	144.2	138.9
383	U1541	B	1	H	3	16	17	3.15	3.64	This study	4.488		141.5	144.1	138.9		145.488		144.4	147.3	143.8		144.4	144.5	143.9		143.3	145	139.5
			PS57/59-2			4.325	4.326	4.325	3.6673	ULLERMANN2016	4.27		143	145.9	140.7		146.986		147.6	148.4	144.9		145.6	146.8	144.8		144.5	146.4	141.3
383	U1541	B	1	H	3	21	22	3.2	3.69	This study	4.344		144.5	147.6	142.4		148.232		148.7	149.9	146.2		147	148.3	145.7		145.2	147.8	142.6
			PS57/59-2			4.375	4.376	4.375	3.7087	ULLERMANN2016	4.4		145.8	148.5	143.3		149.258		149.6	150.8	147.3		148.1	149.3	146.6		145.9	148.5	143.5
383	U1541	B	1	H	3	26	27	3.25	3.74	This study	4.266		147.8	151.4	145.3		150.976		151.3	152.6	150.3		149.8	150.7	147.9		147.6	149.7	145.3
			PS57/59-2			4.425	4.426	4.425	3.7501	ULLERMANN2016	4.27		148.2	152	145.8		151.53		151.7	152.9	150.8		150.2	151.1	148.3		148.1	150.2	145.8
383	U1541	B	1	H	3	31	32	3.3	3.79	This study+ULLERMANN2016	4.287		150.5	154.5	147.8		153.72		153.2	154.2	152.3		152.1	152.5	150.5		149.7	151.4	147.8
			PS57/59-2			4.525	4.526	4.525	3.8329	ULLERMANN2016	4.12		153.1	157.2	149.9		156.074		154.8	155.1	154.6		154.1	154.9	152.8		151.7	153.1	150.3
383	U1541	B	1	H	3	36	37	3.35	3.84	This study	4.15		153.7	157.7	150.3		156.463		155.2	155.4	154.9		154.4	155.2	153		152.2	153.4	150.8
			PS57/59-2			4.575	4.576	4.575	3.8743	ULLERMANN2016	4.24		155.8	160.3	152		158.346		159	160.1	158.6		156.1	156.5	155.6		153.9	155.4	152.6
383	U1541	B	1	H	3	41	42	3.4	3.89	This study	4.401		156.8	161.5	153.1		159.207		160.1	162.1	159.4		156.9	157.4	156.6		154.9	156.5	153.6
			PS57/59-2			4.625	4.626	4.625	3.9157	ULLERMANN2016	4.22		158.4	162.9	154.5		160.618		162.3	165	160.7		158.2	158.8	157.7		156.3	158	154.8
383	U1541	B	1	H	3	46	47	3.45	3.94	This study	4.063		160	164.4	155.7		161.951		165.6	167.3	161.8		159.3	160	158.8		157.8	159.8	155.8
			PS57/59-2			4.675	4.676	4.675	3.957	ULLERMANN2016	4.28		161	165.3	156.9		162.884		166.5	169	162.7		160.5	162.2	159.6		158.9	161	156.5
			PS57/59-2			4.725	4.726	4.725	3.9984	ULLERMANN2016	4.21		163.5	167.7	159.5		165.156		168.4	171	164.4		163.9	165.6	161.5		160.7	163.8	158.3
383	U1541	B	1	H	3	56	57	3.55	4.04	This study+ULLERMANN2016	4.1		166.2	170.3	162.3		167.439		170	172.8	165.9		167	170.3	164.7		163	166.7	160
			PS57/59-2			4.825	4.826	4.825	4.0812	ULLERMANN2016	4.09		168.7	172.8	164.8		169.7		171.7	176.4	167.4		170.2	172.5	167		165.2	169.3	161.8
			PS57/59-2			4.875	4.876	4.875	4.1226	ULLERMANN2016	4.06		171.1	175.2	167.3		171.972		173.2	177.8	169		172.9	176.1	169.7		167.3	172	163.6
			PS57/59-2			4.925	4.926	4.925	4.164	ULLERMANN2016	4.08		173.1	177.8	169.1		174.244		174.9	178.7	171.6		176.6	178.5	171.8		169.6	174.8	165.6
			PS57/59-2			4.975	4.976	4.975	4.2047	ULLERMANN2016	4		175.4	180.3	171.6		176.477		176.4	179.8	173.4		178.8	181.6	173.7		172	177.2	167.9
383	U1541	B	1	H	3	76	77	3.75	4.24	This study+ULLERMANN2016	4.01		177.5	181.9	173.2		178.415		178.7	180.4	174.9		180.4	183	175.7		174	179.2	169.7
			PS57/59-2			5.075	5.076	5.075	4.2824	ULLERMANN2016	4.08		180.3	184.1	175.4		180.741		180.7	181.6	177.1		183.1	184.6	178		176.8	181.5	172.5
			PS57/59-2			5.125	5.126	5.125	4.3212	ULLERMANN2016	4.19		182.6	185.9	177.8		182.871		182.1	182.4	179		185.1	185.5	181.7		179.2	183.5	174.3
383	U1541	B	1	H	3	86	87	3.85	4.34	This study	3.976		183.5	186.8	179.2		183.902		183.5	184.4	180.1		185.9	186.5	182.8		180.4	184.8	175.4
			PS57/59-2			5.175	5.176	5.175	4.36	ULLERMANN2016	4.22		184.4	187.4	180.3		185		184.8	185.5	181.8		186.7	187.3	184.7		181.5	185.6	176.3
			PS57/59-2			5.225	5.226	5.225	4.3989	ULLERMANN2016	3.89		186.7	189.6	182.7		186.751		186.8	187.4	183.9		188	188.5	187.6		183.9	187	179
383	U1541	B	1	H	3	96	97	3.95	4.44	This study+ULLERMANN2016	4		188.4	191.3	185.1		188.6		188.7	189.3	187		189.4	190.1	188.6		186.2	188.2	182.2
			PS57/59-2			5.325	5.326	5.325	4.4765	ULLERMANN2016	3.93		190.2	192.9	187.7		190.243		190.2	190.5	189.6		191.2	191.5	190.4		188	189.3	185.8
			PS57/59-2			5.375	5.376	5.375	4.5154	ULLERMANN2016	3.46		192	194.8	189.7		191.993		191.9	192.5	191.6		193.8	194.8	193.6		189.9	190.8	189.6
			PS57/59-2			5.425	5.426	5.425	4.5543	ULLERMANN2016	3.65		193.8	196.4	191.3		193.744		193.4	194.6	192.6		195.2	196.2	194.5		191.6	192.6	190.5
383	U1541	B	1	H	3	111	112	4.1	4.59	This study+ULLERMANN2016	3.57		195.5	198.4	193.1		195.35		195.1	196.3	194.2		196.4	197.5	195.6		193.1	194.9	191.6
			PS57/59-2			5.525	5.526	5.525	4.6339	ULLERMANN2016	3.47		197.4	200.6	194.9		197.326		197.7	198.4	196.3		198	199.3	196.9		195.2	197.8	192.8
			PS57/59-2			5.575	5.576	5.575	4.6737	ULLERMANN2016	3.31		199.3	203.5	196.3		199.117		201.9	203.3	198.7		200	201.4	198.6		197.4	201.3	193.8
			PS57/59-2			5.625	5.626	5.625	4.7136	ULLERMANN2016	3.4		201.9	205.9	197.8		200.912		204.2	206.4	201.9		201.9	204.7	199.4		200	205.1	195.4
			PS57/59-2			5.675	5.676	5.675	4.7534	ULLERMANN2016	3.38		203.9	207.6	199		202.703		206.7	208.3	204.2		203.8	206.4	201.6		203.6	207.7	196.9
383	U1541	B	1	H	3	131	132	4.3	4.79	This study+ULLERMANN2016	3.27		205.9	209.6	200.6		204.35		209	210.8	206.1		205.3	207.8	203.2		205.8	210.5	199.2
			PS57/59-2			5.775	5.776	5.775	4.833	ULLERMANN2016	3.3		207.9	211.2	202.4		206.285		211.1	212.3	207.7		207.5	209.7	205.1		208	213.4	203.2
			PS57/59-2			5.825	5.826	5.825	4.8728	ULLERMANN2016	3.36		209.7	212.9	203.9		208.076		212.9	213.4	209.1		210	210.5	208		210.3	215.8	205.9
383	U1541	B	1	H	3	141	142	4.4	4.89	This study	3.0345		210.5	213.7	204.7		208.85		213.7	214.3	209.6		210.7	211	209.6		211.2	216.9	207.1
			PS57/59-2			5.875	5.876	5.875	4.9127	ULLERMANN2016	3.1		211.2	214.3	205.9		209.872		214.3	215.1	210.3		211.3	211.5	210.7		212.6	218.1	208.8
			PS57/59-2			5.925	5.926	5.925	4.9525	ULLERMANN2016	3.29		212.9	215.7	208.2		211.663		215.4	216.1	212		212.4	213.1	212		215.5	219.9	211.4
383	U1541	B	1	H	4	2	3	4.5	4.99	This study+ULLERMANN2016	3.07		214.5	216.7	210.6		213.35		216.6	217	214		213.8	214.5	213.6		218.1	221.2	213.8
			PS57/59-2			6.025	6.026	6.025	5.0321	ULLERMANN2016	3.29		216.1	218.3	212.9		215.245		217.5	217.8	216		215.4	216.1	214.7		220.9	222.7	216.3
			PS57/59-2			6.075	6.076	6.075	5.072	ULLERMANN2016	3.35		217.5	219.3	214.9		217.04		218.3	218.4	217.5		216.8	217.4	215.9		222.5	223.9	219.5
			PS57/59-2			6.125	6.126	6.125	5.1118	ULLERMANN2016	3.51		219	220.7	216.9		218.831		219.2	219.5	218.6		218.2	218.9	217.6		223.8	224.8	222.5
			PS57/59-2			6.175	6.176	6.175	5.1516	ULLERMANN2016	3.52		220.7	222.4	218.4		220.622		220.3	220.4	219.5		219.7	220.5	218.5		225.3	226.2	224.5
383	U1541	B	1	H	4	22	23	4.7	5.19	This study+ULLERMANN2016	3.93		222.5	225.3	219.9		222.35		221.8	224.8	220.7		222	223.7	220.8		226.7	229.4	225.7
			PS57/59-2			6.275	6.276	6.275	5.2312	ULLERMANN2016	3.89		224.4	227.3	221.5		224.204		224.8	226.7	221.9		224.1	225.9	222.6		228.6	231.7	226.8
			PS57/59-2			6.325	6.326	6.325	5.2711	ULLERMANN2016	3.86		226.4	229.1	223		226		227	228.5	224.7		226.2	227.5	225.6		230.8	234.4	228.2
			PS57/59-2			6.375	6.376	6.375	5.3109	ULLERMANN2016	3.98		228	230.8	224.5		227.672		229.6	230.5	226.2		228.2	229.7	227.4		232.9	235.7	229.7
			PS57/59-2			6.425	6.426	6.425	5.3516	ULLERMANN2016	4.02		230.2	232.5	226.7		229.382		231.2	232.5	229.6		231	231.5	230.6		236	237.2	232
383	U1541	B	1	H	4	42	43	4.9	5.39	This study+ULLERMANN2016	3.413		231.9	234.3	228.6		230.996		233.5	234	232.6		234.7	235.3	233.6		237.8	238.9	234
383	U1541	B	1	H	4	47	48	4.95	5.44	This study+ULLERMANN2016	3.49		233.8	236.1	231.1		233.097		234.4	235.1	233.8		235.9	236.5	235.2		239.2	240.1	238.3
			PS57/59-2			6.575	6.576	6.575	5.4779	ULLERMANN2016	3.19		234.9	237.2	232.6		234.689		235.2	235.8	234.6		236.8	237.7	236.6		240.1	240.9	239.6
			PS57/59-2			6.625	6.626	6.625	5.5201	ULLERMANN2016	3.38		236.1	238.7	234.4		236.462		236.3	236.4	235.5		237.5	238.5	237		241.3	242.1	241
			PS57/59-2			6.675	6.676	6.675	5.5622	ULLERMANN2016	3.18		237.5	240.6	236.3		238.231		237.8	238.4	237.2		238.5	239.9	237.6		242.7	243.3	242.5
			PS57/59-2			6.725	6.726	6.725	5.6043	ULLERMANN2016	2.86		239.5	242.1	237.7		240		239.8	240.4	239.6		239.9	241	238.3		243.9	244.4	243.6
			PS57/59-2			6.775	6.776	6.775	5.6464	ULLERMANN2016	3.09		241.5	243.5	239		241.714		241.5	241.5	240.7		241.3	242.1	239.4		245	245.4	244.4
383	U1541	B	1	H	4	72	73	5.2	5.69	This study+ULLERMANN2016	3.65		243.5	245	241		243.49		243.6	244.1	242.5		242.8	243.8	242.6		246.2	247.1	245.6
			PS57/59-2			6.875	6.876	6.875	5.7306	ULLERMANN2016	3.95		245.4	246.4	242.7		245.143		244.5	245	243.6		243.8	244.9	243.6		248	249	247.1
			PS57/59-2			6.925	6.926	6.925	5.7727	ULLERMANN2016	3.5		247.1	247.6	244.5		246.857		245.4	245.4	244.2		244.5	245.5	244.2		250	250.5	249.6
			PS57/59-2			6.975	6.976	6.975	5.8148	ULLERMANN2016	4.33		248.8	251.1	246.7		248.571		250.6	251.5	247.7		249	250.6	248.5		252.2	253.8	251.5
			PS57/59-2			7.025	7.026	7.025	5.8569	ULLERMANN2016	4.26		250.6	253.7	248.5		250.286		251.9	253.2	250		251.1	252	250.6		254.1	256.3	252.5
			PS57/59-2			7.075	7.076	7.075	5.899	ULLERMANN2016	4.37		252.5	255.8	249.9		252		253.2	254.4	251.9		253.2	253.5	252.6		256.1	258.6	253.7
383	U1541	B	1	H	4	97	98	5.45	5.94	This study+ULLERMANN2016	4.03		254.3	257.7	250.8		253.546		255.1	256.1	252.8		255.1	255.9	254.4		258	261.5	254.8
			PS57/59-2			7.175	7.176	7.175	5.9833	ULLERMANN2016	4.2		256.3	259.5	252		255.179		256.7	258.4	253.7		256.7	257.4	255.7		260.1	263.9	256
			PS57/59-2			7.225	7.226	7.225	6.0254	ULLERMANN2016	4.19		258.3	262.1	253.2		256.766		258	260.9	254.4		257.8	258.5	256.8		261.9	266	257.3
			PS57/59-2			7.275	7.276	7.275	6.0675	ULLERMANN2016	4.13		260.1	264.4	254.4		258.353		259.3	262.7	255.8		258.9	260.1	257.7		263.8	267.7	258.7
			PS57/59-2			7.325	7.326	7.325	6.1096	ULLERMANN2016	4.24		262.2	266.2	255.8		259.941		260.6	264.7	257		260.3	262.4	258.5		265.4	269.3	260.6
			PS57/59-2			7.375	7.376	7.375	6.1517	ULLERMANN2016	4.17		264.1	267.4	257.5		261.528		261.9	266.2	258.6		262.6	265.7	259.7		267	270.8	262.2
383	U1541	B	1	H	4	122	123	5.7	6.19	This study+ULLERMANN2016	4.2015		265.6	269.1	258.9		262.972		263.5	267.3	260.2		266	267.3	260.5		268.5	272	264.1
383	U1541	A	1	H	1	89	90	0.89	6.238	This study+ULLERMANN2016	4.19		267.3	270.5	261		264.782		265.9	268.8	262.2		268.7	269.7	263.4		270	273.4	266.2
			PS57/59-2			7.525	7.526	7.525	6.278	ULLERMANN2016	4.3		268.6	271.7	263		266.29		267.3	269.9	265.6		269.8	270.5	266.1		271.4	274.7	267.9
			PS57/59-2			7.625	7.626	7.625	6.3622	ULLERMANN2016	4.31		271.1	274.1	266.8		269.465		269.7	271.4	268.6		271.4	272.5	269.7		273.8	276.9	270.5
383	U1541	A	1	H	1	114	115	1.14	6.488	This study	4.107		274.6	278	271.4		274.208		273.1	275.4	271.5		275.6	276.5	272.3		277.8	280.2	274.7
			PS57/59-2			7.825	7.826	7.825	6.5475	ULLERMANN2016	4		276.9	279.6	274.1		276.452		275.5	278	273.8		277.1	278.7	274.8		280.1	282.1	277.6
			PS57/59-2			7.875	7.876	7.875	6.5976	ULLERMANN2016	3.93		279	281.3	276.6		278.341		278.3	280.5	275.8		279.4	280.5	277.7		282.5	284.4	280.1
			PS57/59-2			7.925	7.926	7.925	6.6476	ULLERMANN2016	3.68		281.6	283.4	279.6		280.226		281.6	282.4	279.8		282.1	283.1	281.6		285.6	287.6	283.6
383	U1541	A	1	H	1	134	135	1.34	6.688	This study	3.59		283.3	285.7	281.8		281.749		283.3	284.2	281.9		284.3	285.1	283.7		287.7	290	286
			PS57/59-2			7.975	7.976	7.975	6.6977	ULLERMANN2016	3.51		283.9	286.3	282.2		282.115		283.8	284.7	282.5		284.8	285.5	284.3		288.3	290.5	286.7
			PS57/59-2			8.025	8.026	8.025	6.7477	ULLERMANN2016	3.43		286.5	289.1	284.7		284		286	286.5	285		287	287.5	286		291.1	292.8	289.4
			PS57/59-2			8.075	8.076	8.075	6.7978	ULLERMANN2016	3.68		289.2	291.8	287.1		286.519		288.3	290.3	287.6		289.5	291	288.3		293.7	295.2	292.6
			PS57/59-2			8.125	8.126	8.125	6.8478	ULLERMANN2016	3.86		291.7	294.9	289.7		289.033		290.9	295.5	289.6		292	293.3	291.6		296.4	299.9	294.6
			PS57/59-2			8.175	8.176	8.175	6.8979	ULLERMANN2016	3.8		294.1	297.5	291.4		291.552		293.2	297.8	291.1		294.1	295.3	293.5		300.1	303	298.6
			PS57/59-2			8.225	8.226	8.225	6.9466	ULLERMANN2016	3.93		296.4	299.8	293.2		294		296	299.5	293.7		296.2	297.4	295.4		302.8	305.3	300.8
383	U1541	A	1	H	2	14	15	1.64	6.988	This study+ULLERMANN2016	3.7715		298.1	301.8	294.6		295.938		298.1	301.3	297.6		298.8	300.5	297.4		305	308.3	303.1
383	U1541	A	1	H	2	19	20	1.69	7.038	This study+ULLERMANN2016	3.3715		299.9	304.5	296.4		298.278		300.4	303.4	299.6		301.9	302.5	301.6		307.3	311.7	305.6
			PS57/59-2			8.375	8.376	8.375	7.0812	ULLERMANN2016	3.7		301.5	306.2	299		300.3		304.1	305.3	300.7		303.6	304.5	302.9		308.6	313.4	307.1
383	U1541	A	1	H	2	24	25	1.74	7.088	This study	3.844		301.6	306.3	299.3		300.618		304.5	305.4	300.8		304	304.9	303.4		308.8	313.5	307.1
			PS57/59-2			8.425	8.426	8.425	7.1261	ULLERMANN2016	3.76		303.3	307.7	301		302.402		305.9	306.5	301.9		305.5	306.5	304.3		310.2	315	308.6
			PS57/59-2			8.475	8.476	8.475	7.1709	ULLERMANN2016	3.38		305.3	309.5	302.8		304.498		307.7	311.2	303.1		310	311.5	305.4		311.8	316.6	310.6
			PS57/59-2			8.525	8.526	8.525	7.2195	ULLERMANN2016	3.65		307.3	310.9	304.7		306.773		309.1	314.3	305.6		312.8	313.5	306.4		313.4	317.5	312.1
			PS57/59-2			8.575	8.576	8.575	7.2702	ULLERMANN2016	3.54		309.5	312.8	306.6		309.146		310.3	316.7	308.3		315.6	316.3	308.1		316	319.2	314.6
			PS57/59-2			8.625	8.626	8.625	7.321	ULLERMANN2016	3.43		311.5	315	309.5		311.524		312.4	317.9	311.1		316.9	317.5	310.1		317.5	320.7	316.4
			PS57/59-2			8.675	8.676	8.675	7.3717	ULLERMANN2016	3.17		314.1	317.5	311.7		313.897		315.3	319	314.6		318.4	319.1	313.8		319.2	322.2	317.8
			PS57/59-2			8.725	8.726	8.725	7.4224	ULLERMANN2016	3.27		316.7	319.5	313.7		316.27		319	319.9	316.4		319.7	320.4	315.5		321.3	323.6	319
383	U1541	A	1	H	2	59	60	2.09	7.438	This study	3.351		317.6	320.2	314.4		317		320.1	320.4	318.1		320.3	321	316.3		322.2	324.2	319.8
			PS57/59-2			8.775	8.776	8.775	7.4732	ULLERMANN2016	3.22		319.3	321.5	316.6		319.112		321.8	322.7	320.7		321.6	322.5	318.1		323.4	325.3	321.5
			PS57/59-2			8.825	8.826	8.825	7.5239	ULLERMANN2016	3.02		322.1	323.9	319.5		322.154		325	328.2	323		324.2	325.7	323.6		325.6	327.3	324.7
383	U1541	A	1	H	2	69	70	2.19	7.538	This study	2.81933		322.7	324.7	320.1		323		325.9	328.9	323.6		325.5	326.9	324.6		326	327.7	325.6
			PS57/59-2			8.875	8.876	8.875	7.5746	ULLERMANN2016	2.99		323.9	326.3	321.1		325.196		328.5	330.5	325		328.7	329.8	326.7		327.4	328.9	326.5
			PS57/59-2			8.925	8.926	8.925	7.6253	ULLERMANN2016	3.18		325.3	328.5	322.7		328.238		330.9	331.7	330.6		330.7	331	330.3		328.8	330.3	327.6
383	U1541	A	1	H	2	79	80	2.29	7.638	This study	2.754		326	329.1	323.3		329		331.2	332	330.8		331	331.4	330.6		329.2	330.8	328
			PS57/59-2			8.975	8.976	8.975	7.6761	ULLERMANN2016	3.1		328	330.6	324.8		329.929		332.1	332.6	331.5		331.7	332.2	331.2		330.5	332	329.1
383	U1541	A	1	H	2	84	85	2.34	7.688	This study	2.896		328.8	331.1	325.6		330.22		332.4	332.9	331.8		332	332.4	331.4		331.2	332.7	329.5
			PS57/59-2			9.025	9.026	9.025	7.7268	ULLERMANN2016	2.86		330.3	332.6	327.3		331.166		333.4	333.4	332.4		332.5	333.3	332.2		336.3	336.4	330.8
383	U1541	A	1	H	2	89	90	2.39	7.738	This study	3.175		330.8	332.9	327.7		331.44		333.5	333.7	332.6		332.8	333.7	332.5		336.6	336.9	331.1
			PS57/59-2			9.075	9.076	9.075	7.7775	ULLERMANN2016	3.57		332.3	334.1	329.7		332.403		334.1	334.7	333.7		333.8	334.3	333.6		337.2	338.1	336.6
383	U1541	A	1	H	2	94	95	2.44	7.788	This study	3.001		332.6	334.4	330.2		332.659		334.3	334.9	333.8		334.1	334.5	333.8		337.3	338.2	336.9
			PS57/59-2			9.125	9.126	9.125	7.8282	ULLERMANN2016	3.69		334	335.8	332.1		333.64		335.2	335.5	334.7		335	335.3	334.6		338.2	339.2	337.8
383	U1541	A	1	H	2	99	100	2.49	7.838	This study	3.042		334.3	336.3	332.4		333.879		335.3	335.5	334.9		335.3	335.5	334.9		338.4	339.3	337.9
			PS57/59-2			9.175	9.176	9.175	7.879	ULLERMANN2016	3.71		335.5	337.9	333.8		334.879		336.3	336.7	335.8		336.4	337	335.8		339.5	340.4	338.9
			PS57/59-2			9.225	9.226	9.225	7.9297	ULLERMANN2016	3.84		336.9	340.4	335.3		336.116		337.8	338.2	336.9		337.9	338.5	337.1		341	342.1	340.2
			PS57/59-2			9.275	9.276	9.275	7.9804	ULLERMANN2016	3.99		338.2	344.3	336.6		337.353		339.5	339.5	339		340.1	341.2	339		343.1	344.2	341.8
			PS57/59-2			9.325	9.326	9.325	8.0178	ULLERMANN2016	4.39		339.3	346.9	337.6		338.265		344.7	345	344.5		344.9	346.2	344.4		345.7	346.8	344.7
383	U1541	A	1	H	2	119	120	2.69	8.038	This study	2.896		340.2	348.2	338.2		338.758		347.6	347.9	347.6		347.7	348.2	347.6		348	348.5	347.6
			PS57/59-2			9.375	9.376	9.375	8.0551	ULLERMANN2016	4.19		341	349.1	338.7		339.175		348.5	349.7	347.9		348.3	348.8	348		349.4	350.6	348.6
383	U1541	A	1	H	2	124	125	2.74	8.088	This study+ULLERMANN2016	4.0605		343.6	350.5	339.9		339.978		352.6	353.7	348.3		349.3	349.5	348.7		351.7	353.4	349.4
			PS57/59-2			9.475	9.476	9.475	8.1299	ULLERMANN2016	4.28		345.7	351.8	341.9		341		354.7	355.5	349.4		350.4	351.2	349.9		353.7	355.5	350.5
			PS57/59-2			9.525	9.526	9.525	8.1672	ULLERMANN2016	4.07		347.6	353	343.4		342.324		356.3	358.8	351.7		351.8	353.4	351		355.5	357.6	352.1
			PS57/59-2			9.575	9.576	9.575	8.2114	ULLERMANN2016	4.14		349.5	354.7	345		343.894		357.8	360.5	353.8		353.1	355.6	352.1		357.6	360.7	354.1
			PS57/59-2			9.625	9.626	9.625	8.2573	ULLERMANN2016	4.13		351.1	355.9	346.9		345.524		359.2	361.7	355.8		354.4	357.5	353.2		359.8	362.8	355.8
			PS57/59-2			9.675	9.676	9.675	8.3032	ULLERMANN2016	4.2		352.9	357.5	348.9		347.154		361	363.3	357.8		355.9	359.4	354.3		361.9	364.8	357.8
			PS57/59-2			9.725	9.726	9.725	8.3491	ULLERMANN2016	4.18		354.6	359	350.6		348.784		362.7	365.1	359.8		357.4	361	355.7		363.9	366.5	359.9
			PS57/59-2			9.775	9.776	9.775	8.3951	ULLERMANN2016	4.08		355.9	360.5	352.3		350.417		364.3	366.6	361.9		359.5	362.2	357.2		365.7	368	361.7
383	U1541	A	1	H	3	10	11	3.09	8.438	This study+ULLERMANN2016	4.05		357.3	362.1	353.5		351.94		365.6	367.9	363.6		361.4	363.2	358.3		367.2	369.2	363.7
383	U1541	A	1	H	3	15	16	3.14	8.488	This study+ULLERMANN2016	3.95		358.8	363.7	355		353.716		367.4	369.1	365.6		363.6	364.3	360.1		368.8	370.8	366.6
			PS57/59-2			9.925	9.926	9.925	8.5328	ULLERMANN2016	3.96		360.1	365	356.3		355.307		369.1	370.1	366.8		364.4	365.4	363.4		370	371.8	368
383	U1541	A	1	H	3	20	21	3.19	8.538	This study	3.97		360.4	365.1	356.7		355.491		369.4	370.3	367.2		364.6	365.5	363.6		370.1	372	368.3
			PS57/59-2			9.975	9.976	9.975	8.5787	ULLERMANN2016	3.89		361.9	366.2	357.8		356.936		370.6	371.4	369.5		365.6	366.4	364.3		371.2	373.2	369.4
			PS57/59-2			10.025	10.026	10.025	8.6247	ULLERMANN2016	3.89		363.7	367.4	359.2		358.57		371.4	372.7	370.9		366.6	367.4	365.4		372.3	374.3	370.3
			PS57/59-2			10.075	10.076	10.075	8.6706	ULLERMANN2016	3.89		365.6	368.6	360.5		360.2		372.7	373.8	372.6		367.5	368.2	366.3		373.5	375.5	371.4
383	U1541	A	1	H	3	35	36	3.34	8.688	This study	3.879		366.2	369.1	361		360.817		373	374.3	372.9		367.9	368.5	366.7		374	375.9	371.8
			PS57/59-2			10.125	10.126	10.125	8.7165	ULLERMANN2016	3.92		366.9	369.7	361.9		361.829		373.8	374.9	373.3		368.7	369.3	367.4		374.7	376.7	372.4
			PS57/59-2			10.175	10.176	10.175	8.7624	ULLERMANN2016	3.86		368	370.8	363.6		363.459		374.9	375.8	374.4		369.7	370.4	368.3		375.8	377.6	373.5
			PS57/59-2			10.225	10.226	10.225	8.8102	ULLERMANN2016	3.82		369.2	371.8	365.4		365.157		375.8	376.9	375.2		370.7	371.4	369.6		377	378.7	374.7
			PS57/59-2			10.275	10.276	10.275	8.8623	ULLERMANN2016	3.87		370.3	372.9	366.5		367.007		376.9	377.8	375.9		371.5	372.4	370.4		378.2	379.8	375.8
			PS57/59-2			10.325	10.326	10.325	8.9143	ULLERMANN2016	3.85		371.5	374	368		368.853		377.8	378.7	377		372.5	373.3	371.3		379.3	380.8	376.9
			PS57/59-2			10.375	10.376	10.375	8.9664	ULLERMANN2016	3.88		372.4	375	369.1		370.703		378.8	379.6	377.9		373.3	374	372.3		380.5	381.7	377.8
			PS57/59-2			10.425	10.426	10.425	9.0185	ULLERMANN2016	3.91		373.8	376.2	370.6		372.553		379.9	380.4	379.1		374.1	374.6	373.4		381.6	383	378.8
383	U1541	A	1	H	3	70	71	3.69	9.038	This study	3.862		374.3	376.7	371.1		373.246		380.4	381	379.6		374.6	375.3	373.9		381.9	383.3	379.3
			PS57/59-2			10.475	10.476	10.475	9.0706	ULLERMANN2016	3.73		375	377.3	372		374.403		381.3	381.9	380.2		375.5	376.3	374.8		382.7	384	380.2
			PS57/59-2			10.525	10.526	10.525	9.1226	ULLERMANN2016	3.75		376.1	378.4	373.2		376.25		382.4	383.1	381.3		376.7	377.8	375.9		383.7	384.9	381.3
			PS57/59-2			10.575	10.576	10.575	9.1733	ULLERMANN2016	3.72		377.3	379.5	374.3		378.05		383.3	383.9	382.4		378	378.9	377.1		384.5	386	382.7
			PS57/59-2			10.625	10.626	10.625	9.218	ULLERMANN2016	3.69		378.4	380.4	375.6		379.637		384.2	384.5	383.6		379.1	380	378.1		385.4	386.9	383.9
			PS57/59-2			10.675	10.676	10.675	9.2628	ULLERMANN2016	3.74		379.5	381.4	376.6		381.228		385.1	385.7	384.3		380.1	381	379.1		386.5	387.7	384.8
			PS57/59-2			10.725	10.726	10.725	9.3075	ULLERMANN2016	3.71		380.5	382.5	377.8		382.815		386	386.6	385.6		381.2	382.1	380.2		387.4	388.5	385.9
			PS57/59-2			10.775	10.776	10.775	9.3523	ULLERMANN2016	3.69		381.6	383.4	378.7		384.406		386.9	387.4	386.3		382.4	383.1	381.1		388.2	389.2	386.8
			PS57/59-2			10.825	10.826	10.825	9.397	ULLERMANN2016	3.53		382.7	384.3	379.8		385.993		388	388.8	387.5		383.6	384.2	382.2		389.1	390	387.7
383	U1541	A	1	H	3	110	111	4.09	9.438	This study+ULLERMANN2016	3.58		383.6	385.3	380.8		387.449		388.9	389.7	388.3		384.4	385.2	383.3		389.8	390.7	388.6
383	U1541	A	1	H	3	115	116	4.14	9.488	This study+ULLERMANN2016	3.7		384.8	386.3	381.9		389.225		390	390.6	389.5		385.5	386.3	384.5		390.6	391.4	389.4
			PS57/59-2			10.975	10.976	10.975	9.5312	ULLERMANN2016	3.63		385.9	387.2	383.1		390.759		391.1	391.4	390.4		386.3	387.3	385.5		391.5	392.1	390.3
383	U1541	A	1	H	3	120	121	4.19	9.538	This study	3.778		386	387.4	383.3		391		391.2	391.4	390.6		386.4	387.5	385.7		391.7	392.3	390.4
			PS57/59-2			11.075	11.076	11.075	9.6207	ULLERMANN2016	3.51		387.5	388.9	384.8		391.732		392.9	393.5	392.6		388.7	389.9	387.7		392.6	393.2	391.5
			PS57/59-2			11.175	11.176	11.175	9.7102	ULLERMANN2016	3.29		389.1	390.4	386.8		392.524		394.6	394.7	394.6		390.4	392.8	389.9		393.6	394.3	392.9
383	U1541	A	1	H	3	145	146	4.44	9.788	This study	3.268		390.3	391.8	388.6		393.213		395.3	395.6	395.3		392.7	394.8	392.6		394.6	395.2	394
			PS57/59-2			11.275	11.276	11.275	9.8282	ULLERMANN2016	3.31		391.1	392.7	389.5		393.568		395.9	396.1	395.8		393.8	395.8	393.3		395.2	395.6	394.7
			PS57/59-2			11.325	11.326	11.325	9.8936	ULLERMANN2016	3.08		392.3	393.8	390.7		394.147		396.5	396.7	396.5		394.9	396.6	394.6		395.8	396.4	395.6
			PS57/59-2			11.375	11.376	11.375	9.9591	ULLERMANN2016	3.12		393.3	394.9	391.5		394.727		397.2	397.5	397.2		395.9	397.4	395.5		396.4	397	396.2
			PS57/59-2			11.425	11.426	11.425	10.0246	ULLERMANN2016	3.07		394.4	395.8	392.7		395.307		397.8	398.1	397.8		396.6	398	396.6		397.3	397.8	396.9
383	U1541	A	1	H	4	25	26	4.74	10.088	This study+ULLERMANN2016	3.28		395.5	396.7	393.8		395.868		398.4	398.7	398.4		397.2	398.6	397.2		398.2	398.7	397.5
			PS57/59-2			11.525	11.526	11.525	10.1556	ULLERMANN2016	3.08		396.4	397.6	394.9		396.466		399	399.3	399		397.9	399.3	397.9		399	399.3	398.5
			PS57/59-2			11.575	11.576	11.575	10.221	ULLERMANN2016	3.02		397.3	398.4	395.9		397.045		399.6	399.9	399.6		398.7	400.1	398.6		399.9	399.9	399.6
383	U1541	A	1	H	4	45	46	4.94	10.288	This study+ULLERMANN2016	2.91		398.2	399.3	396.9		397.638		400.2	400.5	400.2		399.4	400.8	399.3		400.5	400.5	400.5
			PS57/59-2			11.675	11.676	11.675	10.352	ULLERMANN2016	2.99		399.1	400.2	397.6		398.205		401	401.3	400.8		400	401.4	399.9		401.1	401.1	401.1
383	U1541	A	1	H	4	55	56	5.04	10.388	This study	2.995		399.9	400.8	398.4		398.523		401.4	401.7	401.3		400.5	401.9	400.3		401.6	401.7	401.6
			PS57/59-2			11.725	11.726	11.725	10.4175	ULLERMANN2016	3.02		400.4	401.4	399		398.784		401.9	402	401.6		400.8	402.3	400.6		401.9	402	401.9
383	U1541	A	1	H	4	60	61	5.09	10.438	This study	2.949		401	401.9	399.6		398.966		402.2	402.4	401.9		401.3	402.6	400.8		402.2	402.4	402.2
			PS57/59-2			11.775	11.776	11.775	10.483	ULLERMANN2016	2.86		401.7	402.8	400.1		399.364		402.8	403	402.4		402.2	403.1	401.4		402.7	402.8	402.7
383	U1541	A	1	H	4	65	66	5.14	10.488	This study	2.9195		401.7	402.8	400.2		399.408		402.8	403	402.4		402.3	403.1	401.4		402.7	402.8	402.7
			PS57/59-2			11.825	11.826	11.825	10.5484	ULLERMANN2016	2.99		402.5	404	401		399.943		403.6	403.7	403		403.2	403.8	402.1		403.3	403.4	403.3
			PS57/59-2			11.875	11.876	11.875	10.6139	ULLERMANN2016	2.99		403.3	405.1	401.9		400.523		404.2	404.3	403.6		404	404.5	403.4		403.9	404	403.9
383	U1541	A	1	H	4	80	81	5.29	10.638	This study	2.928		403.9	405.7	402.5		400.736		404.5	404.9	403.9		404.5	404.9	403.8		404.2	404.3	404.2
			PS57/59-2			11.925	11.926	11.925	10.6794	ULLERMANN2016	2.88		404.5	406.5	403.1		401.102		405.6	405.7	404.3		405.1	405.3	404.3		404.6	404.8	404.6
383	U1541	A	1	H	4	85	86	5.34	10.688	This study	3.019		404.6	406.8	403.4		401.178		405.7	405.9	404.5		405.3	405.4	404.4		404.6	404.8	404.6
			PS57/59-2			11.975	11.976	11.975	10.7449	ULLERMANN2016	2.85		405.6	407.7	404.2		401.682		406.3	406.6	405.6		406.5	406.5	406.5		405.3	405.4	405.3
383	U1541	A	1	H	4	95	96	5.44	10.788	This study	2.877		406.3	408.5	405.1		402.063		406.8	407.1	406		407.359	407.359	407.359		405.7	406	405.7
			PS57/59-2			12.075	12.076	12.075	10.8758	ULLERMANN2016	2.94		407.7	409.7	406.5		402.841		407.8	408.2	407.1		408.077	408.077	408.077		406.6	406.9	406.6
383	U1541	A	1	H	4	110	111	5.59	10.938	This study+ULLERMANN2016	2.76		408.5	410.7	407.4		403.391		408.5	408.8	407.8		408.616	408.616	408.616		407.2	407.5	407.2
			PS57/59-2			12.175	12.176	12.175	11.0068	ULLERMANN2016	2.99		409.4	411.5	408.2		404		409.1	409.4	408.8		409.155	409.155	409.155		407.8	408.2	407.8
			PS57/59-2			12.225	12.226	12.225	11.0723	ULLERMANN2016	2.79		410.3	412.7	409.2		405.055		409.8	410.1	409.5		409.694	409.694	409.694		408.5	408.8	408.5
383	U1541	A	1	H	4	125	126	5.74	11.088	This study	2.844		410.7	413	409.5		405.308		410.1	410.4	409.8		409.873	409.873	409.873		408.6	408.9	408.6
383	U1541	A	1	H	4	130	131	5.79	11.138	This study+ULLERMANN2016	3.17		411.5	413.8	410.4		406.113		410.7	410.9	410.6		410.412	410.412	410.412		409.1	409.4	409.1
383	U1541	A	1	H	4	135	136	5.84	11.188	This study	2.782		412.3	414.6	411.1		406.919		411.2	411.4	411.1		411.13	411.489	410.951		409.5	409.8	409.5
			PS57/59-2			12.325	12.326	12.325	11.2032	ULLERMANN2016	2.97		412.7	414.9	411.4		407.164		411.5	411.8	411.2		411.489	411.849	411.13		409.7	410.1	409.7
383	U1541	A	1	H	4	140	141	5.89	11.238	This study	2.897		413.3	415.5	412		407.724		412	412.3	411.7		412.028	412.208	411.489		410	410.4	410
			PS57/59-2			12.375	12.376	12.375	11.2687	ULLERMANN2016	3		413.8	416.2	412.6		408.219		412.4	412.7	412.1		412.567	412.746	412.028		410.3	410.7	410.3
			PS57/59-2			12.425	12.426	12.425	11.3342	ULLERMANN2016	3.01		414.9	417.2	413.3		409.274		413	413.3	412.7		413.106	413.285	412.746		410.9	411.4	410.9
			PS57/59-2			12.475	12.476	12.475	11.3997	ULLERMANN2016	3.2		415.8	418.1	414.1		410.329		413.6	414.1	413.6		413.644	413.824	413.644		411.5	412	411.5
			PS57/59-2			12.525	12.526	12.525	11.4651	ULLERMANN2016	3.04		416.5	418.8	415		411.382		414.3	414.7	414.3		414.183	414.363	414.183		412.1	412.6	412.1
383	U1541	A	1	H	5	16	17	6.14	11.488	This study	2.987		417.2	419.4	415.5		411.751		414.6	415.2	414.6		414.722	414.722	414.542		412.4	412.9	412.4
			PS57/59-2			12.575	12.576	12.575	11.5306	ULLERMANN2016	3.22		417.9	420.4	416.4		412.438		415	415.8	415		415.081	415.081	414.901		412.9	413.3	412.9
			PS57/59-2			12.625	12.626	12.625	11.5961	ULLERMANN2016	3.12		419	421.4	417.3		413.493		415.6	416.4	415.6		415.62	415.62	415.44		413.5	414	413.5
383	U1541	A	1	H	5	31	32	6.29	11.638	This study	3.079		419.9	422	418.2		414.168		416.1	417	416.1		415.979	415.979	415.799		414	414.4	414
			PS57/59-2			12.675	12.676	12.675	11.6616	ULLERMANN2016	2.99		420.5	422.5	418.8		414.548		416.4	417.5	416.4		416.338	416.338	416.158		414.3	414.9	414.3
			PS57/59-2			12.725	12.726	12.725	11.727	ULLERMANN2016	3.19		421.7	424	419.9		415.601		417.3	418.4	417		417.236	417.415	416.877		414.9	415.5	414.9
383	U1541	A	1	H	5	46	47	6.44	11.788	This study+ULLERMANN2016	3.28		423.1	425.4	421.1		416.584		418.2	419.9	417.8		419.57	420.288	417.415		415.5	416.4	415.5
			PS57/59-2			12.825	12.826	12.825	11.8625	ULLERMANN2016	3.23		424.6	426.6	422.7		417.784		420.2	421.4	419.6		421.186	421.366	419.57		416.4	417.5	416.2
383	U1541	A	1	H	5	61	62	6.59	11.938	This study	3.679		426.3	428.1	424.5		419		422.3	423.6	421.6		423.341	424.059	420.827		417.9	419.3	417
			PS57/59-2			12.875	12.876	12.875	11.9474	ULLERMANN2016	3.54		426.5	428.3	424.8		419.35		422.5	423.9	421.9		423.7	424.418	421.186		418.2	419.4	417.2
			PS57/59-2			12.925	12.926	12.925	12.0323	ULLERMANN2016	4.08		428.3	430.3	427.2		422.514		425.4	426.2	424.6		425.855	426.394	424.598		419.6	420.8	418.4
383	U1541	A	1	H	5	71	72	6.69	12.038	This study	4.119		428.3	430.3	427.2		422.726		425.6	426.3	424.6		425.855	426.573	424.778		419.8	421	418.4
			PS57/59-2			12.975	12.976	12.975	12.1172	ULLERMANN2016	3.81		430.1	432.4	429.5		425.678		426.9	427.4	426.6		427.292	427.471	426.573		421.3	422.2	420.4
383	U1541	B	2	H	2	16	17	8.75	12.195	This study+ULLERMANN2016	4.38		432.1	435.3	431		428.577		428.3	429.4	427.7		429.087	429.447	428.549		422.8	423.4	422.7
			PS57/59-2			13.075	13.076	13.075	12.2592	ULLERMANN2016	4.65		434.1	437.6	432.6		430.969		430.4	432.6	429.4		430.883	433.038	429.806		423.7	424.5	423.6
			PS57/59-2			13.125	13.126	13.125	12.3137	ULLERMANN2016	4.67		435.9	439.7	434.3		433		432.9	436.4	430.9		432.679	435.193	430.883		424.6	425.4	424.2
			PS57/59-2			13.175	13.176	13.175	12.3682	ULLERMANN2016	4.64		438.2	442.2	435.8		435.134		436.1	440.8	432.9		434.834	437.707	432.679		425.6	426.5	424.9
			PS57/59-2			13.225	13.226	13.225	12.4227	ULLERMANN2016	4.61		440.5	444.3	437.6		437.268		440.5	443.1	435.6		437.527	440.221	434.295		426.3	427.4	425.7
			PS57/59-2			13.275	13.276	13.275	12.4803	ULLERMANN2016	4.55		442.5	446.2	439.1		439.523		443.3	446.2	438.7		440.939	443.633	437.527		427.4	432.1	426.5
			PS57/59-2			13.325	13.326	13.325	12.5426	ULLERMANN2016	4.41		444.6	448.8	441.6		441.963		446.2	450	443.6		443.992	446.326	440.58		430	434.1	427.4
383	U1541	B	2	H	2	56	57	9.15	12.595	This study+ULLERMANN2016	4.26		446.3	450.7	443.6		444.014		448.9	453.6	446.6		447.404	449.379	443.812		431.8	435.8	429.4
			PS57/59-2			13.425	13.426	13.425	12.6673	ULLERMANN2016	4.37		448.8	452.9	445.7		446.845		451.8	456.5	448.8		450.636	452.432	447.224		433.9	438.4	431.4
			PS57/59-2			13.475	13.476	13.475	12.7296	ULLERMANN2016	4.29		451	454.9	447.8		449.284		454.1	458.8	451		452.971	456.742	450.457		435.8	441.3	433
			PS57/59-2			13.525	13.526	13.525	12.792	ULLERMANN2016	4.16		453.6	457.3	449.8		451.728		457.6	460.7	454.4		455.844	459.615	453.509		437.8	445.9	434.9
383	U1541	B	2	H	3	4	5	9.4	12.845	This study	4.214		455.6	459.3	451.7		453.803		459.6	462.6	456.8		459.256	462.308	455.664		439.4	450.3	436.5
			PS57/59-2			13.575	13.576	13.575	12.8543	ULLERMANN2016	4.18		456.1	459.7	452		454.167		460	463.1	457.5		459.615	462.668	456.023		439.7	450.9	436.8
383	U1541	B	2	H	3	9	10	9.45	12.895	This study	4.1665		457.5	461.6	453.5		455.761		461.9	464.6	459.6		461.59	464.643	458.358		441.1	453	438.4
			PS57/59-2			13.625	13.626	13.625	12.9167	ULLERMANN2016	4.18		458.5	462.6	454.4		456.61		462.8	465.2	460.5		462.308	465.541	459.615		442	454.1	439.3
383	U1541	B	2	H	3	14	15	9.5	12.945	This study	4.137		459.7	463.9	455.8		457.718		464.3	466.3	462.5		464.104	466.798	461.411		443.3	455.2	440.5
			PS57/59-2			13.675	13.676	13.675	12.979	ULLERMANN2016	4.1		461.1	465.1	457.5		459.05		465.8	468	465.1		465.72	468.234	463.745		445.4	456.5	441.6
383	U1541	B	2	H	3	19	20	9.55	12.995	This study	4.114		461.6	465.7	457.9		459.676		466.3	468.6	465.7		466.259	468.773	464.463		446.3	457.1	442.3
			PS57/59-2			13.725	13.726	13.725	13.0414	ULLERMANN2016	4.03		463.4	467.5	459.6		461.493		468	470.3	466.9		469.312	471.287	467.336		449.2	459.1	444.3
383	U1541	B	2	H	3	24	25	9.6	13.045	This study	4.03		463.6	467.7	459.7		461.634		468.1	470.4	466.9		471.826	473.621	469.491		449.5	459.3	444.5
383	U1541	B	2	H	3	29	30	9.65	13.095	This study+ULLERMANN2016	4.0215		465.4	469.2	461.7		463.592		470.3	472.7	468		474.16	475.597	472.364		452.7	463.4	446.5
383	U1541	B	2	H	3	34	35	9.7	13.145	This study	4.092		467.4	471.2	463.6		465.549		473.3	474.4	469.1		475.417	476.495	474.34		456.7	465.5	448
			PS57/59-2			13.825	13.826	13.825	13.1662	ULLERMANN2016	4.07		468.3	472.1	464.6		466.379		474.4	476.2	469.8		477.752	478.47	477.572		457.9	466.8	448.6
383	U1541	B	2	H	3	39	40	9.75	13.195	This study	3.735		469.4	473.3	465.5		467.507		475.9	479	470.9		479.188	479.906	478.649		459.6	468	449.7
			PS57/59-2			13.875	13.876	13.875	13.2286	ULLERMANN2016	3.85		471	474.7	466.6		468.823		477.6	480.3	475.6		479.727	480.445	479.009		461.4	469.4	451.3
383	U1541	B	2	H	3	44	45	9.8	13.245	This study	3.926		472	475.5	467.1		469.465		478.4	481	476.4		480.984	481.343	480.086		462.8	470.1	452.6
383	U1541	B	2	H	3	49	50	9.85	13.295	This study	3.803		473.9	478.4	468.4		471.423		480.5	481.4	479		482.42	482.959	481.523		466	471.6	458.7
383	U1541	B	2	H	3	54	55	9.9	13.345	This study	3.629		475.6	481.1	469.8		473.38		482.5	483.2	481.7		483.677	484.396	483.498		468.6	473.5	460.5
383	U1541	B	2	H	3	59	60	9.95	13.395	This study	3.484		476.7	483.6	471.3		475.338		483.9	484.5	483.6		485.294	485.473	484.575		470	475.2	461.9
383	U1541	B	2	H	3	64	65	10	13.445	This study	3.957		478.1	486.8	473.2		477.296		485.2	485.4	484.6		493.913	495.17	493.554		471.3	476.4	463.4
383	U1541	B	2	H	3	79	80	10.15	13.595	This study	3.786		481.3	493.9	477.6		483.169		493.9	495.3	493.6		495.709	497.505	494.631		475.8	480.5	471
383	U1541	B	2	H	3	84	85	10.2	13.645	This study	3.387		483.7	495.3	479.4		485.127		495.6	497.1	494.5		497.325	498.582	495.888		479	482.8	475.2
383	U1541	B	2	H	3	89	90	10.25	13.695	This study	3.431		486.3	496.8	482.5		487.085		496.8	498.5	495.8		498.402	500.019	497.505		481.7	485.1	478.2
383	U1541	B	2	H	3	94	95	10.3	13.745	This study	3.4		489.4	498.5	484.9		489.042		498.2	499.6	497		499.48	501.276	498.402		484.5	487.4	480.8
383	U1541	B	2	H	3	99	100	10.35	13.795	This study	3.354		492.6	500	487.4		491		499.4	501	498.5		500.916	502.353	499.48		487.2	491.9	483.6
383	U1541	B	2	H	3	104	105	10.4	13.845	This study	3.382		495	501.4	489.8		493.357		500.8	502	499.4		502.353	503.43	501.276		491.6	494.2	486.1
383	U1541	B	2	H	3	109	110	10.45	13.895	This study	3.378		497.6	502.9	493		495.714		502.2	503.1	501		503.789	504.687	502.533		494.5	496.4	490.6
383	U1541	B	2	H	3	114	115	10.5	13.945	This study	3.551		500.3	504.8	496.1		498.071		503.5	504.2	502.3		504.867	505.944	503.789		497.1	500.2	494.5
383	U1541	B	2	H	3	119	120	10.55	13.995	This study	3.553		503.1	506.4	499.3		500.429		504.3	505.4	503.7		506.124	507.201	505.047		499.9	502.3	497.1
383	U1541	B	2	H	3	124	125	10.6	14.045	This study	3.53		505.1	508.3	501.7		502.786		505.4	506.8	504.8		507.381	508.279	506.304		501.7	504.5	500
383	U1541	B	2	H	3	129	130	10.65	14.095	This study	3.571		507.4	510.4	504.3		505.143		506.8	507.4	506		508.638	509.177	507.561		503.4	508	501.7
383	U1541	B	2	H	3	134	135	10.7	14.145	This study	3.7425		509.7	513.2	506.4		507.5		508	508.9	507.2		509.895	510.434	508.818		504.8	510.9	503.1
383	U1541	B	2	H	3	139	140	10.75	14.195	This study	3.803		512.1	516.2	508.4		509.857		509.2	510.4	508.1		510.972	511.511	510.075		506	513.2	504.6
383	U1541	B	2	H	3	144	145	10.8	14.245	This study	3.953		514.5	519	510.1		512.214		510.1	512.7	509.5		512.23	512.409	511.511		507.2	515.9	505.8
383	U1541	B	2	H	4	4	5	10.85	14.295	This study	3.607		516.8	522.6	511.5		514.571		511.2	515.6	510.6		513.666	514.744	513.666		509.2	519.9	507.2
383	U1541	B	2	H	4	9	10	10.9	14.345	This study	3.878		519.3	525.8	513.2		516.929		512.2	518.2	511.6		515.103	516.898	514.384		511.9	522.8	508.9
383	U1541	B	2	H	4	14	15	10.95	14.395	This study	3.8965		522.2	528.4	515.1		519.286		513.3	521.4	512.9		517.078	520.131	515.821		514.7	524.2	510.9
383	U1541	B	2	H	4	19	20	11	14.445	This study	3.806		525.2	530.6	517.3		521.643		515.1	526.4	513.9		520.131	523.183	517.617		518.8	525.4	512.9
383	U1541	B	2	H	4	24	25	11.05	14.495	This study	3.716		528.6	532.7	520.2		524		518.8	529.2	515.8		525.697	528.032	520.131		522.6	526.9	515.9
383	U1541	B	2	H	4	29	30	11.1	14.545	This study	3.762		530.7	535	523.1		525.962		525.5	531	518.2		527.852	532.88	525.697		525.2	528	519.9
383	U1541	B	2	H	4	34	35	11.15	14.595	This study	3.801		533.2	537	526.7		527.923		529.8	533.2	525.5		532.88	534.856	527.852		527.4	529	523.7
383	U1541	B	2	H	4	39	40	11.2	14.645	This study	3.826		535.3	539.3	530.6		529.885		532.9	535.1	530.4		535.215	537.37	533.599		529	530.4	526.7
383	U1541	B	2	H	4	44	45	11.25	14.695	This study	4.007		537.1	542	533.6		531.846		534.8	537.3	533.8		537.37	539.524	535.035		530.4	531.9	528.7
383	U1541	B	2	H	4	49	50	11.3	14.745	This study	4.025		539.3	544.6	535.9		533.808		537.1	539.6	535.3		539.524	541.5	536.113		531.9	533.5	530.4
383	U1541	B	2	H	4	54	55	11.35	14.795	This study	4.115		541.6	546.6	538		535.769		539.4	542.3	536.8		540.782	543.655	537.19		533.5	535.9	531.8
383	U1541	B	2	H	4	59	60	11.4	14.845	This study	4.136		543.7	548.6	539.7		537.731		542	544.5	538.8		542.038	545.45	538.447		535	537.6	533.2
383	U1541	B	2	H	4	64	65	11.45	14.895	This study	3.99		545.4	550.1	541.7		539.692		544.3	546.3	540.9		543.116	547.426	540.243		536.4	539	534.5
383	U1541	B	2	H	4	69	70	11.5	14.945	This study	4.17		547.5	551.5	543.5		541.654		546.9	548.7	542.9		544.193	549.401	542.577		537.9	540.3	536.1
383	U1541	B	2	H	4	74	75	11.55	14.995	This study	4.133		549.5	553	545.2		543.615		549.2	550.6	544.8		545.45	551.197	544.553		539.4	541.9	537.3
383	U1541	B	2	H	4	79	80	11.6	15.045	This study	3.954		551.3	554.4	547.2		545.577		551	553.6	546.3		547.246	552.454	545.989		540.9	543.1	538.8
383	U1541	B	2	H	4	84	85	11.65	15.095	This study	4.158		553.2	555.6	549		547.538		552.5	554.4	548.7		549.94	553.711	547.605		542.2	544.3	540.2
383	U1541	B	2	H	4	89	90	11.7	15.145	This study	4.04		554.8	557	551.2		549.5		554.2	556.4	551.2		552.633	555.327	549.221		543.7	545.5	541.7
383	U1541	B	2	H	4	94	95	11.75	15.195	This study	4.037		556.4	558.2	553		551.462		556.2	557.4	553.8		554.788	557.482	551.376		545.2	546.9	543.2
383	U1541	B	2	H	4	99	100	11.8	15.245	This study	3.872		557.9	559.6	554.8		553.423		557.7	558.8	555.4		556.584	559.637	555.147		546.7	548.6	544.8
383	U1541	B	2	H	4	104	105	11.85	15.295	This study	3.85		559.3	561.4	556.4		555.385		559	560.6	558		558.38	561.073	557.661		548.1	550.3	546.4
383	U1541	B	2	H	4	109	110	11.9	15.345	This study	3.75733		560.8	563.2	557.9		557.346		560.2	561.9	559.4		560.355	562.33	559.457		549.8	551.8	547.7
383	U1541	B	2	H	4	114	115	11.95	15.395	This study	3.835		562.3	564.9	559.3		559.308		561.4	563.2	560.6		562.51	564.126	561.432		551.5	553.5	549.3
383	U1541	B	2	H	4	119	120	12	15.445	This study	3.674		563.8	566.9	560.6		561.269		562.5	565.1	561.9		564.126	566.281	563.228		553.5	556.5	551
383	U1541	B	2	H	4	124	125	12.05	15.495	This study	3.69		565.7	568.9	562.3		563.231		564	568.1	563.4		566.281	569.693	564.844		556.2	561.7	552.8
383	U1541	B	2	H	4	129	130	12.1	15.545	This study	3.557		567.8	570.4	563.8		565.192		565.2	569.6	564.5		568.615	571.847	566.281		558.6	563.4	555
383	U1541	B	2	H	4	134	135	12.15	15.595	This study	3.402		569.8	572.4	565.4		567.154		566.4	570.7	565.7		570.77	573.464	567.538		561.2	566.9	558.6
383	U1541	B	2	H	4	139	140	12.2	15.645	This study	3.423		571.3	574.4	566.9		569.115		569.5	571.5	568.6		572.386	575.798	568.795		564.5	568.7	560.8
383	U1541	B	2	H	5	2	3	12.25	15.695	This study	3.156		572.7	577.7	568.9		571.077		572.1	572.7	571.6		574.182	580.647	570.231		569.6	571.6	563.5
383	U1541	B	2	H	5	7	8	12.3	15.745	This study	3.644		574.2	579.4	570.7		573.038		574.1	574.4	573.6		576.696	581.544	575.259		572.1	574.2	567.2
383	U1541	B	2	H	5	12	13	12.35	15.795	This study	3.141		577	581.4	572.2		575		577.1	579.3	575.7		581.544	582.622	581.544		575.9	580.8	574.2
383	U1541	B	2	H	5	17	18	12.4	15.845	This study	3.897		579.4	583.1	574.2		576.667		581.5	581.9	580.6		582.263	583.52	582.083		582.6	582.9	581.5
383	U1541	B	2	H	5	22	23	12.45	15.895	This study	3.24		581.4	584.4	579.4		578.333		582.3	582.5	581.9		582.981	584.418	582.622		583.4	583.4	582.3
383	U1541	B	2	H	5	27	28	12.5	15.945	This study	3.941		583.4	586	581.2		580		583.2	583.8	582.6		583.879	585.495	583.34		584.6	585.2	583.5
383	U1541	B	2	H	5	32	33	12.55	15.995	This study	3.91		585.2	587.3	582.3		581.667		584.1	584.8	583.4		584.418	586.393	583.879		585.8	586.9	584.8
383	U1541	B	2	H	5	37	38	12.6	16.045	This study	3.983		586.9	588.7	583.4		583.333		585.1	585.4	584.3		585.675	587.47	584.777		587.2	588.3	586
383	U1541	B	2	H	5	42	43	12.65	16.095	This study	3.812		588.6	590.6	584.6		585		586	586.4	585.5		586.752	588.727	585.495		588.6	589.6	587.2
383	U1541	B	2	H	5	47	48	12.7	16.145	This study	3.653		589.8	592.1	585.7		586.667		586.7	587.2	586.3		587.47	589.446	586.752		589.9	590.4	588.7
383	U1541	B	2	H	5	52	53	12.75	16.195	This study	4.055		591	593.5	586.9		588.333		587.5	588.7	587.2		588.548	590.882	587.83		592.4	593.5	590.7
383	U1541	B	2	H	5	57	58	12.8	16.245	This study	3.661		592.4	595.7	588.1		590		588.7	589.9	588.6		589.805	592.139	588.907		594.7	597	593.6
383	U1541	B	2	H	5	62	63	12.85	16.295	This study	3.669		593.9	597.6	589.3		591.667		589.9	591.2	589.2		590.882	593.396	589.625		596.8	599.1	594.8
383	U1541	B	2	H	5	67	68	12.9	16.345	This study	3.733		595.4	599.3	590.7		593.333		591.2	592.5	590.2		592.319	595.192	590.703		598.6	600.9	596
383	U1541	B	2	H	5	72	73	12.95	16.395	This study	3.743		597	600.6	591.9		595		592.5	594.7	591.3		593.935	597.706	591.96		600	602.5	597.3
383	U1541	B	2	H	5	77	78	13	16.445	This study	3.681		598.8	602.2	593.1		596.667		594.1	597.6	592.5		595.371	599.143	593.576		601.4	604.1	598.8
383	U1541	B	2	H	5	82	83	13.05	16.495	This study	3.669		600.6	603.5	594.4		598.333		596.2	599.4	593.9		598.783	600.579	595.192		602.9	605.7	600.3
383	U1541	B	2	H	5	87	88	13.1	16.545	This study	3.626		602.5	604.7	596		600		598.9	601.5	595.9		600.938	602.195	598.065		604.7	607	602
383	U1541	B	2	H	5	92	93	13.15	16.595	This study	3.673		603.8	606.1	597.7		601.667		601.7	602.9	598.2		603.093	604.17	602.554		606.6	608.4	603.8
383	U1541	B	2	H	5	97	98	13.2	16.645	This study	3.26		605.5	607.5	600		603.333		603.8	605.1	603.1		605.248	607.403	604.53		609	610.5	606.4
383	U1541	B	2	H	5	102	103	13.25	16.695	This study	3.567		606.9	608.9	602.8		605		606.1	606.9	605.1		607.942	609.917	606.685		611.2	612.4	607.8
383	U1541	B	2	H	5	107	108	13.3	16.745	This study	3.436		608.4	610.7	605.5		606.667		608.6	608.9	607		609.917	611.713	608.839		613	614.4	609.9
383	U1541	B	2	H	5	112	113	13.35	16.795	This study	3.269		610.4	613.4	607.8		608.333		611.3	613	610.1		611.713	613.149	610.635		614.8	617.1	612.2
383	U1541	B	2	H	5	117	118	13.4	16.845	This study	3.228		613.1	615.6	610.4		610		613.9	615	612.5		613.329	614.227	612.251		617.6	619.6	614.8
383	U1541	B	2	H	5	122	123	13.45	16.895	This study	3.261		615.6	617.4	613.3		613.333		616.5	617.7	615.1		615.125	615.484	614.586		620.3	621.7	617.9
383	U1541	B	2	H	5	127	128	13.5	16.945	This study	3.855		618	619.4	617.1		616.667		619.2	619.9	617.3		617.1	617.459	615.843		623.2	625	621.8
383	U1541	B	2	H	5	132	133	13.55	16.995	This study	3.361		620	620.9	618.9		620		620.8	620.9	618.6		620.871	622.307	619.614		625.7	626.3	622.5
383	U1541	B	2	H	5	137	138	13.6	17.045	This study	3.945		622.3	623.2	621.1		623.333		622.3	622.9	621.2		624.283	627.156	622.667		627	627.5	625
383	U1541	B	2	H	5	142	143	13.65	17.095	This study	4.294		624.7	626.9	623.1		626.667		624.4	624.9	623.2		628.772	629.49	627.515		628.3	629.3	627.2
383	U1541	B	2	H	5	147	148	13.7	17.145	This study	4.747		627.5	630.4	624.6		630		629	631.8	625.8		631.466	633.98	628.054		629.9	632.5	628.7
383	U1541	B	2	H	6	3	4	13.75	17.195	This study	4.566		629.9	633.9	626.1		632.667		633.4	634.8	628.3		633.98	635.416	628.952		631.9	635.6	630.1
383	U1541	B	2	H	6	8	9	13.8	17.245	This study	4.724		632.2	636.6	628.1		635.333		635.9	637	630.2		635.596	636.494	630.029		634.1	637.9	631.6
383	U1541	B	2	H	6	13	14	13.85	17.295	This study	4.605		634.5	639.4	630.2		638		639.2	640.8	633.7		637.391	638.649	631.286		636.6	640	633.4
383	U1541	B	2	H	6	18	19	13.9	17.345	This study	4.427		637	642	632.2		640.667		641.7	645.3	637.1		638.828	640.803	633.082		638.9	642	635.4
383	U1541	B	2	H	6	23	24	13.95	17.395	This study	4.532		639.4	644.7	634.1		643.333		644.4	648.9	639.5		639.905	642.419	635.596		640.9	644	637.1
383	U1541	B	2	H	6	28	29	14	17.445	This study	4.4745		641.2	647.2	635.7		646		647.5	651.3	642		641.342	645.472	637.93		642.6	646.3	639.1
383	U1541	B	2	H	6	33	34	14.05	17.495	This study	4.513		643.4	649.8	637.7		648.667		651.3	653	646.9		646.011	647.447	640.265		644.4	648.7	641.2
383	U1541	B	2	H	6	38	39	14.1	17.545	This study	4.505		645.8	652.4	640		651.333		653.7	655	651.1		648.166	650.321	642.599		646.6	651.6	643.5
383	U1541	B	2	H	6	43	44	14.15	17.595	This study	4.27		648.7	655	642.9		654		656.3	658.2	655.1		650.321	652.476	644.215		649	654	645.8
383	U1541	B	2	H	6	48	49	14.2	17.645	This study	4.233		651.6	657.9	645.2		656.667		658.5	660.3	657.1		653.194	654.451	646.909		651.3	656.6	648.1
383	U1541	B	2	H	6	53	54	14.25	17.695	This study	4.362		654.4	660.5	647.6		659.333		661.2	662.7	659.2		655.349	659.658	649.782		654.2	659.1	650.4
383	U1541	B	2	H	6	58	59	14.3	17.745	This study	4.242		657.3	662.9	650.5		662		664.1	666.1	660.9		657.324	662.352	652.296		657.1	662	652.8
383	U1541	B	2	H	6	63	64	14.35	17.795	This study	4.254		659.7	665.5	653.4		664.667		667.3	668.7	663.8		660.018	665.046	656.426		660	664.6	655.3
383	U1541	B	2	H	6	68	69	14.4	17.845	This study	4.078		662.1	667.8	655.9		667.333		669.5	670.8	665.2		663.25	667.38	659.299		662.6	667.2	658.5
383	U1541	B	2	H	6	73	74	14.45	17.895	This study	4.141		665	669.9	658.6		670		671.3	672.7	666.4		665.943	669.355	662.172		665.5	670.2	660.9
383	U1541	B	2	H	6	78	79	14.5	17.945	This study	4.099		667.5	672.1	661.2		672.667		672.8	674.2	669.2		668.278	672.049	665.225		668.9	672.7	664
383	U1541	B	2	H	6	83	84	14.55	17.995	This study	4.183		669.9	674	664.3		675.333		674.3	675.4	671.6		672.049	674.204	667.739		671.8	674.7	667.2
383	U1541	B	2	H	6	88	89	14.6	18.045	This study	4.143		672.4	676.5	666.9		678		675.9	676.9	673.7		675.281	678.873	670.971		674.8	676.5	670.8
383	U1541	B	2	H	6	93	94	14.65	18.095	This study	3.933		674.7	678.8	669.5		680.667		677.6	678.8	675.7		679.77	683.362	676.359		677.2	680.9	674.5
383	U1541	B	2	H	6	98	99	14.7	18.145	This study	3.851		677.2	681.2	672.2		683.333		679.7	681.2	677.4		682.823	686.774	681.207		680.9	683.5	677.9
383	U1541	B	2	H	6	103	104	14.75	18.195	This study	3.94		679.8	683	674.8		686		681.7	682.7	678.8		687.851	688.39	684.799		684.1	685.9	680.8
383	U1541	B	2	H	6	108	109	14.8	18.245	This study	3.623		682.1	685.2	677.4		686.904		683.4	684.9	681.4		688.929	689.467	687.851		686.9	690.2	684.9
383	U1541	B	2	H	6	113	114	14.85	18.295	This study	3.579		684	687.2	678.9		687.808		684.9	687.9	683		690.006	690.904	689.288		689	692.4	686.7
383	U1541	B	2	H	6	118	119	14.9	18.345	This study	3.449		685.6	688.8	680.6		688.712		687.3	689.6	684.4		691.084	692.161	690.186		691.1	694.2	688.4
383	U1541	B	2	H	7	3	4	14.95	18.395	This study	3.502		687.2	690.7	683.2		689.617		688.7	691	687		692.52	693.418	690.904		693.1	695.9	689.6
383	U1541	B	2	H	7	8	9	15	18.445	This study	3.428		688.7	692.4	685.6		690.521		690.1	691.9	687.6		693.239	694.495	691.981		695	697.5	690.8
383	U1541	B	2	H	7	13	14	15.05	18.495	This study	3.566		690.1	693.7	687.3		691.425		691.3	693	688.5		694.495	696.471	693.239		696.8	699.1	692.4
383	U1541	B	2	H	7	18	19	15.1	18.545	This study	3.297		691.4	695.4	689		692.329		692.4	694.8	689.6		696.112	698.446	694.316		698.8	701.1	694.2
383	U1541	C	3	H	3	11	12	16.72	18.598	This study	3.312		693	696.8	690.5		693.288		693.6	697.9	691		697.548	699.883	695.573		700.9	702.9	696.2
383	U1541	C	3	H	3	16	17	16.77	18.648	This study	3.363		694.2	698.2	692.1		694.192		694.8	699.4	692.2		699.164	700.96	696.83		702.6	704.3	698.2
383	U1541	C	3	H	3	21	22	16.82	18.698	This study	3.311		695.7	699.5	693.1		695.096		697.2	700.4	694		700.78	702.038	698.266		704.1	705.8	700.3
383	U1541	C	3	H	3	26	27	16.87	18.748	This study	3.246		696.9	701.1	694.5		696		699.4	701.7	696.6		703.474	704.731	701.858		705.6	707.5	702.6
383	U1541	C	3	H	3	36	37	16.97	18.848	This study	3.472		699.8	703.8	697.1		698.88		703	704.7	701.2		705.09	705.809	703.833		708.5	709.9	706.9
383	U1541	C	3	H	3	41	42	17.02	18.898	This study	3.438		701.1	704.9	698.5		700.32		704.7	706.1	703.2		706.527	707.784	705.629		709.8	711	708.4
383	U1541	C	3	H	3	46	47	17.07	18.948	This study	3.91767		702.4	706.4	699.7		701.76		707.2	707.8	707		707.604	708.323	706.347		710.8	712.4	709.6
383	U1541	C	3	H	3	51	52	17.12	18.998	This study	3.603		703.8	707.6	701.2		703.2		708.2	709.1	707.6		708.323	709.759	707.425		712	713.4	710.8
383	U1541	C	3	H	3	57	58	17.17	19.048	This study	3.6375		705.2	708.8	702.6		704.64		709.3	710.2	708.5		710.298	711.196	709.58		713.1	714.5	711.9
383	U1541	C	3	H	3	66	67	17.27	19.148	This study	3.6415		707.6	711.4	705.2		707.52		710.7	711.7	709.9		711.196	712.273	710.477		714.8	716	713.7
383	U1541	C	3	H	3	71	72	17.32	19.198	This study	3.6775		709	712.7	706.6		708.96		711.7	712.7	711		712.453	713.351	711.375		716	716.9	714.9
383	U1541	C	3	H	3	76	77	17.37	19.248	This study	3.681		711.3	714	708.1		710.4		713	714	712.2		714.967	715.505	714.608		717.1	717.8	716.6
383	U1541	C	3	H	3	81	82	17.42	19.298	This study	4.36		713.1	715.3	709.6		711.84		715.1	715.6	715.1		716.583	717.122	716.583		718.3	718.9	717.7
383	U1541	C	3	H	3	86	87	17.47	19.348	This study	3.927		714.2	716.5	711.3		713.28		716	716.5	715.6		717.66	718.379	717.122		719.5	720.3	718.8
383	U1541	C	3	H	3	91	92	17.52	19.398	This study	4.122		715.4	717.7	713.1		714.72		716.8	716.9	716.3		718.738	719.636	718.019		720.7	721.8	720
383	U1541	C	3	H	3	96	97	17.57	19.448	This study	4.226		716.8	718.9	714.3		716.16		718	718.6	717.1		719.815	720.534	718.917		722	722.9	721.2
-0.804	4.186	C	3	H	3	101	102	17.62	19.498	This study	4.186		717.8	720	715.7		717.6		719.2	719.8	718.5		720.893	721.431	719.995		722.9	724	722.1
383	U1541	C	3	H	3	106	107	17.67	19.548	This study	4.229		719.1	721.1	717.1		719.04		720.1	720.9	719.4		721.97	722.329	720.713		723.8	724.9	723
383	U1541	C	3	H	3	111	112	17.72	19.598	This study	4.31		720.3	722.3	718.3		720.48		721.2	722	720.3		723.586	724.125	722.15		724.7	725.5	723.8
383	U1541	C	3	H	3	121	122	17.82	19.698	This study	4.224		722.1	724	720.6		723.36		722.4	723	721.7		724.304	725.202	723.407		725.9	726.7	725
383	U1541	C	3	H	3	126	127	17.87	19.748	This study	4.189		723.3	724.9	721.8		724.8		723.5	724.1	722.6		725.382	726.28	724.664		726.7	727.6	725.8
383	U1541	C	3	H	3	131	132	17.92	19.798	This study	4.119		724.6	726.2	723.2		726.24		724.4	724.9	723.6		726.639	727.716	725.741		727.8	729.1	726.9
383	U1541	C	3	H	3	136	137	17.97	19.848	This study	3.896		725.6	727.8	724.4		727.68		725.5	726.4	725		727.896	729.153	726.998		729	730.4	727.8
383	U1541	C	3	H	3	141	142	18.02	19.898	This study	3.921		726.9	729.1	725.5		729.12		726.4	727.9	725.6		729.332	730.59	728.255		730.2	732	728.8
383	U1541	C	3	H	3	146	147	18.07	19.948	This study	3.958		728.1	730.7	726.6		730.56		727.6	729.3	726.4		730.769	732.385	729.512		731.4	733.7	729.9
383	U1541	C	3	H	4	1	2	18.12	19.998	This study	3.752		729.5	732.2	727.6		732		729.1	731.9	727.6		732.026	734.72	730.769		733	735.4	731.3
383	U1541	C	3	H	4	6	7	18.17	20.048	This study	3.852		730.7	733.6	728.8		732.96		730.8	733.6	729.1		733.463	735.977	732.206		734.6	737.1	732.8
383	U1541	C	3	H	4	11	12	18.22	20.098	This study	3.828		731.9	734.8	730.2		733.92		733.7	734.8	730.8		734.72	737.593	734.54		736.3	738.6	734.3
383	U1541	C	3	H	4	16	17	18.27	20.148	This study	4.074		733	736	731.6		734.88		735.3	736	735.1		735.977	738.132	735.258		737.8	739.7	735.6
383	U1541	C	3	H	4	21	22	18.32	20.198	This study	3.922		734.8	737.4	733		735.84		736.2	737.1	735.6		737.234	739.029	736.156		739.2	740.9	736.9
383	U1541	C	3	H	4	26	27	18.37	20.248	This study	3.951		736.3	738.5	734.3		736.8		737.2	738.2	736.3		738.132	740.107	737.234		740.4	742	738.3
383	U1541	C	3	H	4	31	32	18.42	20.298	This study	3.901		737.5	739.7	735.9		737.76		738.2	738.9	737.2		739.389	741.184	738.311		741.5	743	739.5
383	U1541	C	3	H	4	36	37	18.47	20.348	This study	4.01		738.8	740.7	737.1		738.72		738.9	740.1	738.2		740.646	742.082	739.389		742.7	744.1	740.4
383	U1541	C	3	H	4	41	42	18.52	20.398	This study	3.929		740.1	742	738.6		739.68		740.1	741.2	739.2		742.082	743.339	740.825		743.6	745.2	741.7
383	U1541	C	3	H	4	46	47	18.57	20.448	This study	3.885		741.5	742.9	740		740.64		741.4	742.1	740.4		743.339	744.417	742.621		745	746.2	742.7
383	U1541	C	3	H	4	51	52	18.62	20.498	This study	3.923		742.7	744.4	741.4		741.6		742.6	742.9	741.7		744.776	745.853	744.596		746.1	747.3	744.1
383	U1541	C	3	H	4	56	57	18.67	20.548	This study	4.148		744	745.6	743		742.56		743.6	744.4	743		746.212	747.11	745.494		747.5	748.8	745.5
383	U1541	C	3	H	4	61	62	18.72	20.598	This study	4.103		745.2	746.9	744		743.52		744.7	745.6	744		747.649	748.367	746.751		748.7	749.8	746.7
383	U1541	C	3	H	4	66	67	18.77	20.648	This study	3.958		746.5	748.1	745		744.48		746.2	746.9	745.2		748.726	749.624	747.649		750.1	751	748.5
383	U1541	C	3	H	4	71	72	18.82	20.698	This study	4.167		747.6	749.3	746.2		745.44		748.2	750.1	746.9		749.983	750.522	749.086		751.3	752.2	749.4
383	U1541	C	3	H	4	76	77	18.87	20.748	This study	4.115		748.8	750.4	747.3		746.4		750.2	752	748.4		751.061	751.6	750.522		752.3	753.4	750.7
383	U1541	C	3	H	4	81	82	18.92	20.798	This study	4.005		750.1	751.6	748.5		747.36		751.9	753.3	750.1		752.138	752.497	751.42		753.6	754.6	752
383	U1541	C	3	H	4	86	87	18.97	20.848	This study	3.988		751.1	752.7	749.6		748.32		753.7	754.8	751.7		753.395	753.934	752.677		754.6	756	753.3
383	U1541	C	3	H	4	91	92	19.02	20.898	This study	4.131		752.3	753.7	750.8		749.28		755.6	756.5	753.4		754.473	755.191	753.575		755.9	757.1	754.3
383	U1541	C	3	H	4	96	97	19.07	20.948	This study	3.999		753.4	754.8	752		750.24		757.1	757.8	755.6		755.37	756.268	754.473		757.1	758.3	755.6
383	U1541	C	3	H	4	101	102	19.12	20.998	This study	3.981		754.5	755.7	753.3		751.2		758.1	759.1	757.1		756.628	757.166	755.37		758.1	759.5	756.9
383	U1541	C	3	H	4	106	107	19.17	21.048	This study	3.929		755.6	756.8	754.6		752.16		759.2	760	758.5		757.525	758.064	756.628		759.4	760.6	758
383	U1541	C	3	H	4	111	112	19.22	21.098	This study	3.928		756.6	757.7	755.6		753.12		760.1	760.7	759.5		758.244	759.142	757.525		760.6	761.7	759.2
383	U1541	C	3	H	4	116	117	19.27	21.148	This study	3.658		757.7	758.8	756.9		754.08		761.2	761.8	761		759.142	760.578	758.244		761.7	762.7	760.6
383	U1541	C	3	H	4	121	122	19.32	21.198	This study	3.729		758.6	759.7	757.7		755.04		761.8	762.7	761.5		760.219	761.117	759.142		762.7	763.9	761.4
383	U1541	C	3	H	4	126	127	19.37	21.248	This study	3.81		759.7	760.7	758.6		756		762.6	763.9	762		761.117	761.835	760.578		763.8	765	762.1
383	U1541	C	3	H	4	131	132	19.42	21.298	This study	3.739		760.6	761.8	759.4		756.96		763.6	765	762.6		761.835	762.553	761.296		764.9	766.1	763.2
383	U1541	C	3	H	4	136	137	19.47	21.348	This study	3.7215		761.5	762.7	760.3		757.92		765	765.5	763.5		762.374	763.811	762.015		765.9	767	764.1
383	U1541	C	3	H	4	141	142	19.52	21.398	This study	3.634		762.4	763.8	761.2		758.88		765.5	766.1	765		764.529	765.067	763.631		766.8	768.1	765.2
383	U1541	C	3	H	5	1	2	19.62	21.498	This study	3.7		763.6	765.2	762.4		760.8		766.4	767.2	765.9		765.606	765.786	764.529		768.1	769.3	766.7
383	U1541	C	3	H	5	6	7	19.67	21.548	This study	3.67		764.6	766.1	763.2		761.76		767	767.6	766.4		766.145	766.504	765.606		769	770.1	767.8
383	U1541	C	3	H	5	11	12	19.72	21.598	This study	3.713		765.5	767.2	764.1		762.72		767.6	768.1	767		766.863	767.222	766.145		769.7	770.8	768.5
383	U1541	C	3	H	5	16	17	19.77	21.648	This study	3.82		766.4	768.1	765		763.68		768.1	768.5	767.5		767.402	767.941	767.043		770.5	771.6	769.4
383	U1541	C	3	H	5	21	22	19.82	21.698	This study	3.839		767.5	769	765.9		764.64		768.7	769	768.1		768.3	768.479	767.941		771.4	772.3	770.4
383	U1541	C	3	H	5	26	27	19.87	21.748	This study	3.757		768.4	770.1	766.8		765.6		769.3	770.1	768.7		769.198	769.736	768.838		772.2	773.1	771.1
383	U1541	C	3	H	5	31	32	19.92	21.798	This study	3.616		769.4	771	767.8		766.56		770.1	770.8	769.3		770.455	770.814	769.916		773	773.9	772
383	U1541	C	3	H	5	36	37	19.97	21.848	This study	3.583		770.4	772.2	768.5		767.52		770.7	771.4	769.9		771.712	772.25	771.173		773.7	774.8	772.8
383	U1541	C	3	H	5	41	42	20.02	21.898	This study	3.574		771.6	773.4	769.4		768.48		771.4	772	770.7		772.969	773.328	772.25		774.6	775.5	773.6
383	U1541	C	3	H	5	46	47	20.07	21.948	This study	3.58		772.8	774.8	770.4		769.44		772.2	772.8	771.6		774.226	774.585	773.328		775.4	776.5	774.5
383	U1541	C	3	H	5	51	52	20.12	21.998	This study	3.526		774	775.9	771.4		770.4		772.8	773.6	772.3		775.483	776.021	774.585		776.5	777.4	775.4
383	U1541	C	3	H	5	56	57	20.17	22.048	This study	3.381		775.1	777.1	772.5		771.36		773.7	774.3	773.1		776.74	777.278	775.483		777.4	778.3	776.5
383	U1541	C	3	H	5	61	62	20.22	22.098	This study	3.56		776.3	778.3	773.7		772.32		774.6	774.9	774		777.817	778.356	776.74		778.3	779.4	777.4
383	U1541	C	3	H	5	66	67	20.27	22.148	This study	3.22867		777.5	779.5	774.9		773.28		775.7	776.3	775.1		778.715	779.433	777.997		779.4	780.6	778.6
383	U1541	C	3	H	5	71	72	20.32	22.198	This study	3.296		778.6	780.7	776.2		774.24		776.8	777.7	775.9		779.792	780.331	778.894		780.7	781.8	779.4
383	U1541	C	3	H	5	76	77	20.37	22.248	This study	3.283		779.8	782	777.4		775.2		777.8	778.8	776.8		780.69	781.768	779.792		781.8	783	780.7
383	U1541	C	3	H	5	81	82	20.42	22.298	This study	3.239		780.9	782.9	778.4		776.16		778.9	780.1	777.7		781.588	782.666	780.69		782.9	784.1	781.8
383	U1541	C	3	H	5	86	87	20.47	22.348	This study	3.2395		782.1	784.1	779.7		777.12		780.4	781.5	778.8		782.486	783.563	781.768		784.1	785.3	782.9
383	U1541	C	3	H	5	91	92	20.52	22.398	This study	3.1625		783.5	785.2	780.9		778.08		781.8	782.7	780		783.384	784.461	783.025		785.2	786.5	783.9
383	U1541	C	3	H	5	96	97	20.57	22.448	This study	3.332		784.7	786.4	782.3		779.04		783.2	783.9	781.3		784.82	785	784.282		786.2	787.5	785.3
383	U1541	C	3	H	5	101	102	20.62	22.498	This study	3.166		785.8	787.3	783.6		780		784.2	784.9	782.4						787.5	789	786.5
383	U1541	C	3	H	5	106	107	20.67	22.548	This study	3.331		787	788.5	785		781.408		785.3	786.2	783.6						788.8	790	788.5
383	U1541	B	3	H	2	56	57	18.37	22.595	This study	3.2212		788.1	789.7	786.2		782.732		786.4	787.3	784.9						790	791	789.1
383	U1541	B	3	H	2	61	62	18.42	22.645	This study	3.265		789.1	790.8	787.6		784.141		787.6	788.4	786.2						791.1	791.9	790.2
383	U1541	B	3	H	2	66	67	18.47	22.695	This study	3.401		790.5	792.3	789		785.549		788.7	789	787.8						792.3	792.8	791.4
383	U1541	B	3	H	2	71	72	18.52	22.745	This study	3.885		791.7	793.7	790.2		786.958		789.9	790.5	789.1						793.6	794	792.6
383	U1541	B	3	H	2	76	77	18.57	22.795	This study	3.872		793.3	795.2	791.7		788.366		791.3	791.9	790.2						794.3	795.1	793.7
383	U1541	B	3	H	2	81	82	18.62	22.845	This study	3.927		794.9	796.8	793.1		789.775		792.6	792.9	791.7						795.2	796.3	794.6
383	U1541	B	3	H	2	86	87	18.67	22.895	This study	4.133		796.6	798.9	794.6		791.183		795.2	797.8	793.4						796.5	797.4	795.7
383	U1541	B	3	H	2	91	92	18.72	22.945	This study	4.268		798.3	801.3	796.3		792.592		798.3	800.4	795.4						797.8	800.1	796.8
383	U1541	B	3	H	2	96	97	18.77	22.995	This study	4.388		800	803.2	798		794		801.2	802.7	797.7						799.7	802.3	798.3
383	U1541	B	3	H	2	101	102	18.82	23.045	This study	4.107		802	805.3	799.8		796.471		803.8	805.2	803						802	804.4	800.3
383	U1541	B	3	H	2	106	107	18.87	23.095	This study	4.1625		804.1	807.6	801.8		798.941		806.1	807.1	804.9						804.2	806.4	802.1
383	U1541	B	3	H	2	111	112	18.92	23.145	This study	4.1685		806.5	810.2	803.6		801.412		808.5	809	806.7						806.4	809.1	804.2
383	U1541	B	3	H	2	116	117	18.97	23.195	This study	4.0675		808.8	812.9	805.9		803.882		811.9	812.9	809.7						810.3	812.5	806.5
383	U1541	B	3	H	3	2	3	19.02	23.245	This study	3.649		812.3	816.5	809.4		806.353		815.7	819	813.7						814	816.1	809.6
383	U1541	B	3	H	3	7	8	19.07	23.295	This study	3.546		815.4	819.4	811.7		808.824		818.6	822.1	817.1						816.8	818.7	813.7
383	U1541	B	3	H	3	12	13	19.12	23.345	This study	3.512		818.1	822.4	813.6		811.294		821.6	824.8	818.1						819.2	821.3	816.1
383	U1541	B	3	H	3	17	18	19.17	23.395	This study	3.597		820.3	824.8	815.2		813.765		824.1	829	819.7						821.6	824.8	817.5
383	U1541	B	3	H	3	27	28	19.27	23.495	This study	3.6005		825	829	817.7		818.706		830.2	834.9	822.9						825.9	827.9	820.4
383	U1541	B	3	H	3	32	33	19.32	23.545	This study	3.53		827.1	830.8	819.5		821.176		834.2	837.7	824.5						827.6	829.4	821.9
383	U1541	B	3	H	3	42	43	19.42	23.645	This study	3.51		830	833.5	823		826.118		839	841.5	833.1						830	831.9	825.8
383	U1541	B	3	H	3	47	48	19.47	23.695	This study	3.5195		831.6	835.1	825.3		828.588		841.2	842.7	835.7						831.4	833.1	828.1
383	U1541	B	3	H	3	57	58	19.57	23.795	This study	3.273		834.5	837.2	829		833.529		843.9	844.8	843						833.9	835.4	832.2
383	U1541	B	3	H	3	62	63	19.62	23.845	This study	3.2255		835.8	838.7	831.4		836		845.3	845.9	844.4						835.1	836.8	833.7
383	U1541	B	3	H	3	67	68	19.67	23.895	This study	3.279		837.7	840.1	833.7		838		846.4	847	845.9						836.4	838	834.9
383	U1541	B	3	H	3	71	72	19.71	23.935	This study	3.421		838.9	841.2	834.9		839.6		847.3	847.7	847.1						837.7	839	836.1
383	U1541	B	3	H	3	77	78	19.77	23.995	This study	3.5795		840.7	842.9	837.5		842		848.2	849	847.7						839.3	841.3	838.1
383	U1541	B	3	H	3	82	83	19.82	24.045	This study	3.481		841.9	844.2	839		844		849	851.3	848.4						841.6	843.5	839.3
383	U1541	B	3	H	3	87	88	19.87	24.095	This study	3.43		843.6	845	840.4		846		851.1	852.2	849						843.5	846.2	841.8
383	U1541	B	3	H	3	92	93	19.92	24.145	This study	3.304		845.3	849	842.4		848		852.2	853.1	851.3						845.8	850.5	843.3
383	U1541	B	3	H	3	97	98	19.97	24.195	This study	3.251		847	852.8	844.2		850		853.2	854.2	852.3						848.7	855.2	844.8
383	U1541	B	3	H	3	101	102	20.01	24.235	This study	3.24667		848.7	855.5	845.6		851.6		854	854.9	853.1						850.6	857.2	846.2
383	U1541	B	3	H	4	3	4	20.07	24.295	This study	3.254		852.5	858	847.9		854		854.9	856.6	854.3						855.4	859.3	848.8
383	U1541	B	3	H	4	13	14	20.17	24.395	This study	3.02		858.1	861.6	853.7		858		857.5	858.9	856.4						860.7	862.1	854.3
383	U1541	B	3	H	4	18	19	20.22	24.445	This study	3.01		860.4	863.6	857.1		860		858.7	860.1	857.7						862.4	863.5	859.5
383	U1541	B	3	H	4	23	24	20.27	24.495	This study	3.013		863.2	865.6	859.6		862		860.6	862.7	859.2						863.9	864.4	862.4
383	U1541	B	3	H	4	33	34	20.37	24.595	This study	4.03567		867.3	868.8	865.3		866		867.3	868	867.1						866.7	867.6	866.5
383	U1541	B	3	H	4	38	39	20.42	24.645	This study	3.9135		868.7	870.5	867.3		868		868.8	869	868.2						867.4	869.4	867
383	U1541	B	3	H	4	43	44	20.47	24.695	This study	4.174		870	871.9	868.8		870		870.2	870.8	869.4						868.8	870.8	868
383	U1541	B	3	H	4	48	49	20.52	24.745	This study	4.38		871.6	873.5	870		872		871.6	872.5	871.1						870.6	872.5	869.1
383	U1541	B	3	H	4	53	54	20.57	24.795	This study	4.376		872.9	875.1	871.2		874		873.1	874.1	872.2						872.2	874.5	870.5
383	U1541	B	3	H	4	58	59	20.62	24.845	This study	4.367		874.3	876.6	872.6		875.667		874.5	875.5	873.4						873.7	876	871.6
383	U1541	B	3	H	4	63	64	20.67	24.895	This study	4.45		875.5	878	873.8		877.333		875.7	876.9	874.6						875.4	877.7	872.5
383	U1541	B	3	H	4	68	69	20.72	24.945	This study	4.32		877	879.5	875.2		879		877	878.3	875.8						876.7	879.5	874
383	U1541	B	3	H	4	73	74	20.77	24.995	This study	4.2805		878.4	881.2	876.4		880.667		878.6	879.6	877.2						878.3	882.5	875.8
383	U1541	B	3	H	4	78	79	20.82	25.045	This study	4.245		879.8	883	877.8		882.333		879.9	880.9	878.7						879.8	884.7	877.5
383	U1541	B	3	H	4	83	84	20.87	25.095	This study	4.1205		881.5	884.4	879		884		881.3	882.2	881						881.6	886.7	879
383	U1541	B	3	H	4	88	89	20.92	25.145	This study	4.113		883.2	885.9	880.3		885.667		882.5	883.6	881.8						883.8	888.7	880.7
383	U1541	B	3	H	4	93	94	20.97	25.195	This study	4.16967		884.7	887.3	881.6		887.333		883.8	885	882.8						886.1	890.6	882.2
383	U1541	B	3	H	4	98	99	21.02	25.245	This study	4.208		886.2	888.8	883.3		889		885	886.5	883.8						888.5	892.3	884.1
383	U1541	B	3	H	4	103	104	21.07	25.295	This study	4.215		887.6	890.3	884.7		890.667		886.1	887.7	885						890.9	894	886.4
383	U1541	B	3	H	4	108	109	21.12	25.345	This study	4.239		889.1	891.6	886.1		892.333		887	889.6	885.9						893.1	895.4	888
383	U1541	B	3	H	4	113	114	21.17	25.395	This study	4.242		890.5	893.2	887.7		894		889.4	893.1	887						895.4	896.6	890.3
383	U1541	B	3	H	4	118	119	21.22	25.445	This study	3.839		892	895.1	889.1		895.556		892	894.9	890.2						897	898.4	892.2
383	U1541	B	3	H	4	123	124	21.27	25.495	This study	3.929		893.7	896.6	890.8		897.111		895.5	898.4	892.3						898.4	899.9	894.5
383	U1541	B	3	H	4	128	129	21.32	25.545	This study	3.901		894.9	898.1	892.6		898.667		898.3	899.9	894.9						899.5	901.2	896.6
383	U1541	B	3	H	4	133	134	21.37	25.595	This study	3.874		896.3	899.9	894.1		900.222		899.9	901.2	898.7						900.7	902.5	898
383	U1541	B	3	H	4	138	139	21.42	25.645	This study	3.797		897.8	901.6	895.7		901.778		901.2	902.4	899.9						901.8	903.8	899
383	U1541	B	3	H	4	143	144	21.47	25.695	This study	3.809		899	903	897		903.333		902.4	903.5	901.2						903	905.1	900.4
383	U1541	B	3	H	5	5	6	21.57	25.795	This study	3.892		901.8	905.9	899.2		906.444		904.1	905.3	902.4						904.4	907.7	902.2
383	U1541	B	3	H	5	10	11	21.62	25.845	This study	3.791		903.2	907.1	900.9		908		905.1	906.8	903.3						905.4	909	903.6
383	U1541	B	3	H	5	15	16	21.67	25.895	This study	3.775		904.8	908.6	902.1		909.556		906.4	908.6	904.1						907	910.2	904.5
383	U1541	B	3	H	5	20	21	21.72	25.945	This study	3.7845		906.5	910.2	903.5		911.111		907.7	910.5	904.8						908.2	911.2	906.5
383	U1541	B	3	H	5	25	26	21.77	25.995	This study	3.7615		908.8	911.4	905.1		912.667		910	911.7	905.7						909.4	912.6	907.6
383	U1541	B	3	H	5	30	31	21.82	26.045	This study	3.939		910.9	912.9	907.1		914.222		911.9	913.1	906.7						910.6	914.1	909.1
383	U1541	B	3	H	5	35	36	21.87	26.095	This study	3.539		912.3	914.1	908.6		915.778		913.2	914.3	907.4						912.9	915.7	911.2
383	U1541	B	3	H	5	45	46	21.97	26.195	This study	3.27		915.1	916.4	912.6		918.889		915.4	916.1	908.8						917.3	919.5	915.2
383	U1541	B	3	H	5	50	51	22.02	26.245	This study	3.414		916.6	919.6	915.1		920.444		916.7	916.9	916						920.6	922.4	918
383	U1541	B	3	H	5	55	56	22.07	26.295	This study	4.035		920.2	924.1	917.7		922		923.6	924.2	922.5						926.8	929.1	923.5
383	U1541	B	3	H	5	60	61	22.12	26.345	This study	3.744		924.8	927.1	920.2		924		929.7	930.9	929.1						931.8	933.8	925.9
383	U1541	B	3	H	5	65	66	22.17	26.395	This study	3.696		927.1	929.9	923.9		926		931.8	933.4	930.6						934	936	931.1
383	U1541	B	3	H	5	70	71	22.22	26.445	This study	3.663		929.4	931.8	926.4		928		934.1	935.5	932.2						935.8	938	934
383	U1541	B	3	H	5	75	76	22.27	26.495	This study	3.557		931.4	933.8	928.2		930		935.7	937.2	934						937.6	939.9	936
383	U1541	B	3	H	5	80	81	22.32	26.545	This study	3.507		933.1	935.5	929.9		932		937.2	938.1	935.7						939.3	941.8	937.3
383	U1541	B	3	H	5	85	86	22.37	26.595	This study	3.483		934.6	936.9	931.5		934		938.4	939.2	937.2						940.7	943.3	938.6
383	U1541	B	3	H	5	90	91	22.42	26.645	This study	3.492		936.1	938.6	933.2		936		939.5	940.1	938.4						942.2	944.8	939.8
383	U1541	B	3	H	5	95	96	22.47	26.695	This study	3.553		937.8	940.2	934.9		938		940.7	940.9	939.8						944.1	946.5	941.3
383	U1541	B	3	H	5	100	101	22.52	26.745	This study	3.317		939.6	941.9	936.7		940		942.2	943	941.3						945.9	948	943.1
383	U1541	B	3	H	5	105	106	22.57	26.795	This study	3.217		941.3	944.2	938.7		942		944.2	945.9	943.1						947.6	949.6	945.1
383	U1541	B	3	H	5	110	111	22.62	26.845	This study	3.141		943.3	946.7	941		944		947.1	948.3	944.7						949.2	951.1	947.1
383	U1541	B	3	H	5	115	116	22.67	26.895	This study	3.027		945.3	949.2	942.8		946		948.3	950	947.1						950.8	952.6	948.9
383	U1541	B	3	H	5	120	121	22.72	26.945	This study	3.028		947.6	951.4	944.5		948		949.6	951.5	948.3						952.1	954.1	950.5
383	U1541	B	3	H	5	125	126	22.77	26.995	This study	3.053		949.9	953.8	946.8		950		950.8	953.1	949.7						953.4	956	951.7
383	U1541	B	3	H	5	130	131	22.82	27.045	This study	2.966		952	955.7	948.9		952		952.1	954.3	951.2						954.7	958.6	952.9
383	U1541	B	3	H	5	135	136	22.87	27.095	This study	3.108		954.3	957.5	951.4		954.4		954.1	955.2	953.1						956.3	963.3	954.6
383	U1541	B	3	H	5	140	141	22.92	27.145	This study	2.948		956.9	959.6	954.3		956.8		956.4	956.9	955						959.2	965.9	956.7
383	U1541	B	3	H	5	145	146	22.97	27.195	This study	3.721		959.6	961.8	957.5		959.2		959	959.6	959						964.1	967.3	963.6
383	U1541	B	3	H	6	3	4	23.02	27.245	This study	3.827		961.6	964.1	959.6		961.6		961	961	960.2						967.3	968.5	966.6
383	U1541	B	3	H	6	8	9	23.07	27.295	This study	4.206		963.9	966.3	961.6		964		963.4	964.7	961.9						968.5	969.5	967.6
383	U1541	B	3	H	6	13	14	23.12	27.345	This study	4.063		965.9	968.2	963.6		965.894		965.6	966.6	963.9						969.7	970.9	968.6
383	U1541	B	3	H	6	18	19	23.17	27.395	This study	3.755		967.9	969.9	965.4		967.788		967.3	968	967.1						970.9	972	969.9
383	U1541	B	3	H	6	23	24	23.22	27.445	This study	4.035		969.9	970.9	967.3		969.682		968.8	968.9	968						972.3	973.4	971.4
383	U1541	B	3	H	6	28	29	23.27	27.495	This study	3.461		972	975.3	969.4		971.576		973.5	975.8	971.1						974.1	977.5	973.5
383	U1541	B	3	H	6	38	39	23.37	27.595	This study	3.393		975.7	978.9	972.8		975.364		976.9	979.3	975						978.1	981.5	976.6
383	U1541	B	3	H	6	58	59	23.57	27.795	This study	3.488		981.6	984	979.2		982.939		982.2	983	979.6						984.8	987.3	983.4
383	U1541	B	3	H	6	63	64	23.62	27.845	This study	3.95		983.3	985.7	981.1		984.833		985.3	986.9	983.3						986.5	989.1	985.6
383	U1541	B	3	H	6	68	69	23.67	27.895	This study	3.9		984.8	986.9	982.5		986.727		987.4	988.6	985.3						987.9	990.8	986.6
383	U1541	B	3	H	6	73	74	23.72	27.945	This study	3.705		986.3	988.6	983.9		988.621		989.2	990.3	987.1						989.7	992.6	987.9
383	U1541	B	3	H	6	78	79	23.77	27.995	This study	3.736		987.9	990.5	985.3		990.515		990.5	991.7	989.1						991.5	994.3	989.4
383	U1541	B	3	H	6	83	84	23.82	28.045	This study	3.711		989.5	992.7	986.9		992.409		991.7	992.9	990.2						993.5	995.8	991.2
383	U1541	B	3	H	6	88	89	23.87	28.095	This study	3.704		991.2	994.9	988.6		994.303		992.9	994.7	991.7						995.5	997.5	993.1
383	U1541	B	3	H	6	93	94	23.92	28.145	This study	3.527		994.3	998.4	991.1		996.197		995.3	997.6	993.7						998.1	1002.2	995.6
383	U1541	C	4	H	4	98	99	28.6	28.251	This study	3.65		1000.1	1002.7	997.2		1000.21		1000.1	1002.4	999						1006	1008.8	1003.4
383	U1541	C	4	H	4	103	104	28.65	28.301	This study	3.822		1002.5	1005	1001.1		1002.11		1002.5	1006.2	1001.1						1008.6	1010.5	1005.9
383	U1541	C	4	H	4	108	109	28.7	28.351	This study	3.911		1004.7	1006.6	1002.5		1004		1004.8	1008.2	1003.1						1010.1	1011.8	1007.4
383	U1541	C	4	H	4	113	114	28.75	28.401	This study	3.702		1006.3	1008.3	1003.9		1005.54		1006.8	1009.8	1004.3						1011.2	1013	1008.6
383	U1541	C	4	H	4	118	119	28.8	28.451	This study	3.76933		1007.7	1009.8	1005.3		1007.08		1009.4	1011.2	1005.9						1012.3	1014.1	1010.1
383	U1541	C	4	H	4	123	124	28.85	28.501	This study	3.851		1009.2	1011.2	1006.8		1008.62		1011.1	1012.3	1007.4						1013.5	1015.2	1011.4
383	U1541	C	4	H	4	128	129	28.9	28.551	This study	3.8055		1010.6	1012.6	1008.2		1010.15		1012.4	1013.4	1008.9						1014.7	1016.3	1012.6
383	U1541	C	4	H	4	134	135	28.95	28.601	This study	3.595		1012	1014	1009.5		1011.69		1013.8	1014.9	1010.1						1015.8	1017.3	1013.8
383	U1541	C	4	H	4	138	139	29	28.651	This study	3.516		1013.4	1015.5	1011.1		1013.23		1015.6	1017.2	1011.5						1017	1018.4	1015.2
383	U1541	C	4	H	4	143	144	29.05	28.701	This study	3.527		1014.7	1017.3	1012.4		1014.77		1017.3	1018.5	1013						1018.1	1019.3	1016.6
383	U1541	C	4	H	4	148	149	29.1	28.751	This study	3.556		1016.3	1018.8	1013.8		1016.31		1019	1019.6	1013.7						1019.2	1020.4	1017.5
383	U1541	C	4	H	5	3	4	29.15	28.801	This study	3.659		1017.8	1020.7	1015.3		1017.85		1019.9	1020.7	1014.6						1020.4	1021.4	1018.8
383	U1541	C	4	H	5	13	14	29.25	28.901	This study	3.238		1020.5	1023.7	1018.1		1020.92		1021.3	1021.9	1016.3						1023.9	1025.4	1021.3
383	U1541	C	4	H	5	18	19	29.3	28.951	This study	3.3735		1022.2	1025.4	1019.9		1022.46		1022.1	1022.5	1017.9						1025.9	1027.2	1023.1
383	U1541	C	4	H	5	23	24	29.35	29.001	This study	3.056		1024.2	1026.9	1021.4		1024		1023	1023	1021.1						1027.9	1028.9	1024.8
383	U1541	C	4	H	5	28	29	29.4	29.051	This study	3.345		1026.2	1028.8	1023		1025.66		1024.2	1025	1023.3						1029.4	1030.6	1027.1
383	U1541	C	4	H	5	33	34	29.45	29.101	This study	3.571		1028.5	1030.8	1024.8		1027.31		1025.9	1027.2	1025.1						1030.8	1032.3	1029.5
383	U1541	C	4	H	5	38	39	29.5	29.151	This study	3.3955		1030.1	1032.4	1027.1		1028.97		1028	1029.2	1026.8						1032.1	1033.3	1030.9
383	U1541	C	4	H	5	53	54	29.65	29.301	This study	4.051		1034.3	1036.6	1032.4		1033.93		1033.8	1035.2	1033						1035.9	1037.3	1034.7
383	U1541	C	4	H	5	58	59	29.7	29.351	This study	3.931		1035.9	1038.5	1033.7		1035.59		1036.1	1036.9	1034.9						1037.2	1038.5	1036.1
383	U1541	C	4	H	5	63	64	29.75	29.401	This study	4.118		1037.5	1040.4	1035.2		1037.24		1038.2	1040.4	1037						1038.5	1039.9	1037.3
383	U1541	C	4	H	5	68	69	29.8	29.451	This study	3.994		1038.8	1042	1036.6		1038.9		1040.2	1043.1	1038.4						1039.6	1041.1	1038.5
383	U1541	C	4	H	5	73	74	29.85	29.501	This study	4.01		1040.4	1044	1037.9		1040.55		1043.1	1044.6	1039.8						1040.8	1042.7	1039.8
383	U1541	C	4	H	5	78	79	29.9	29.551	This study	3.851		1041.9	1045.4	1039.5		1042.21		1045.3	1046.5	1041.1						1042.2	1043.9	1041
383	U1541	C	4	H	5	83	84	29.95	29.601	This study	3.89		1043.4	1046.8	1040.8		1043.86		1046.6	1048	1042.4						1043.6	1045.3	1042.2
383	U1541	C	4	H	5	88	89	30	29.651	This study	3.949		1044.8	1048.2	1042.2		1045.52		1047.9	1048.9	1043.6						1044.8	1046.5	1043.6
383	U1541	C	4	H	5	93	94	30.05	29.701	This study	3.846		1046.2	1049.4	1043.7		1047.17		1049.2	1050.6	1045.1						1046.2	1047.9	1044.6
383	U1541	C	4	H	5	98	99	30.1	29.751	This study	3.846		1047.7	1050.8	1045.1		1048.83		1050.6	1052.3	1046.2						1047.4	1049.2	1046
383	U1541	C	4	H	5	103	104	30.15	29.801	This study	3.802		1049.2	1052.1	1046.5		1050.48		1052	1053.7	1047.4						1048.8	1050.6	1047.2
383	U1541	C	4	H	5	108	109	30.2	29.851	This study	3.873		1050.8	1053.3	1047.9		1052.14		1053.5	1054.9	1048.6						1050.1	1051.8	1048.3
383	U1541	C	4	H	5	113	114	30.25	29.901	This study	3.805		1052	1054.6	1049.2		1053.79		1055	1056.1	1050						1051.5	1053	1049.7
383	U1541	C	4	H	5	118	119	30.3	29.951	This study	3.916		1053.3	1055.8	1050.6		1055.45		1056.2	1057.5	1051.4						1052.7	1054.3	1050.9
383	U1541	C	4	H	5	123	124	30.35	30.001	This study	3.894		1054.7	1057.2	1052		1057.1		1057.5	1058.4	1052.9						1054.1	1055.3	1052.3
383	U1541	C	4	H	5	128	129	30.4	30.051	This study	3.937		1056.1	1058.4	1053.5		1058.76		1058.8	1059	1054.3						1055.5	1056.4	1053.5
383	U1541	C	4	H	5	133	134	30.45	30.101	This study	3.7645		1057.5	1059.5	1055.2		1060.41		1060.2	1060.7	1056.6						1056.9	1057.9	1055.2
383	U1541	C	4	H	5	138	139	30.5	30.151	This study	3.686		1059	1061	1057.3		1062.07		1061.7	1062.5	1060.4						1058.4	1059.5	1057
383	U1541	C	4	H	5	143	144	30.55	30.201	This study	3.29875		1060.5	1062.8	1059.1		1063.72		1063.3	1063.7	1063.1						1060.2	1063	1058.8
383	U1541	C	4	H	5	148	149	30.6	30.251	This study	3.353		1062.2	1064.5	1060.5		1065.38		1064.3	1064.9	1063.6						1061.6	1065.1	1060.4
383	U1541	C	4	H	6	3	4	30.65	30.301	This study	2.995		1063.9	1066	1061.9		1067.03		1065.6	1066.2	1064.2						1063.3	1066.8	1061.7
383	U1541	C	4	H	6	8	9	30.7	30.351	This study	3.422		1065.7	1066.9	1063.6		1068.69		1066.8	1066.9	1064.8						1065.4	1068.5	1063.4
383	U1541	C	4	H	6	13	14	30.75	30.401	This study	2.952		1067.7	1070.7	1065.4		1070.34		1068.8	1070.6	1067.4						1068.6	1071.4	1066.3
383	U1541	C	4	H	6	18	19	30.8	30.451	This study	2.867		1069.8	1074.1	1067.7		1072		1071.5	1072.6	1068.9						1070.6	1074	1069.1
383	U1541	C	4	H	6	23	24	30.85	30.501	This study	3.245		1072	1075.8	1070		1074.17		1073.2	1073.8	1070.3						1072.4	1075.9	1071.2
383	U1541	C	4	H	6	28	29	30.9	30.551	This study	2.903		1074.3	1077.6	1072.7		1076.33		1074.3	1074.9	1071.8						1074.7	1077.3	1073
383	U1541	C	4	H	6	33	34	30.95	30.601	This study	3.279		1076.7	1079.9	1075		1078.5		1075.3	1075.9	1073.2						1077.2	1078.8	1075.2
383	U1541	C	4	H	6	38	39	31	30.651	This study	3.005		1079.3	1082.2	1077		1080.67		1076.5	1076.9	1074.3						1079.1	1080.4	1076.9
383	U1541	C	4	H	6	43	44	31.05	30.701	This study	3.049		1082	1085.9	1078.8		1082.83		1078.2	1079	1075.6						1081.1	1082.5	1079.3
383	U1541	C	4	H	6	48	49	31.1	30.751	This study	3.459		1085.1	1089.1	1081.6		1085		1081.6	1083	1081.1						1083.6	1087.1	1081.7
383	U1541	C	4	H	6	53	54	31.15	30.801	This study	3.438		1088.6	1092.1	1085.2		1087.17		1084.3	1087.1	1083.1						1086.8	1092.1	1084.2
383	U1541	C	4	H	6	58	59	31.2	30.851	This study	3.581		1092.1	1095.3	1088		1089.33		1087.8	1090.7	1085.7						1090.4	1095	1087.4
383	U1541	C	4	H	6	63	64	31.25	30.901	This study	3.6405		1095.2	1098.7	1091.5		1091.5		1091.5	1094.4	1089.1						1094.7	1097.8	1090.1
383	U1541	C	4	H	6	68	69	31.3	30.951	This study	3.774		1098.1	1102	1094.6		1093.67		1094.6	1097	1091.7						1097.5	1101.9	1094.3
383	U1541	C	4	H	6	73	74	31.35	31.001	This study	3.81		1101.4	1104.9	1097.5		1095.83		1098.1	1100.7	1094.4						1099.6	1106	1097.9
383	U1541	C	4	H	6	78	79	31.4	31.051	This study	3.952		1104.8	1110	1099.9		1098		1100.7	1103	1097.6						1102.5	1110.3	1100.5
383	U1541	C	4	H	6	83	84	31.45	31.101	This study	3.621		1110	1115.5	1103.3		1108		1106.8	1110.1	1103.1						1108.6	1115.2	1103.4
383	U1541	C	4	H	6	88	89	31.5	31.151	This study	3.757		1115.3	1118.5	1108		1112		1113.2	1115.6	1109.2						1113.9	1120.7	1106.6
383	U1541	C	4	H	6	93	94	31.55	31.201	This study	3.901		1118.2	1121.4	1115		1116		1115.8	1118.2	1113.3						1120.7	1122.2	1113.6
383	U1541	C	4	H	6	98	99	31.6	31.251	This study	3.893		1121.1	1123.6	1117.3		1120		1118.4	1121	1116.2						1122.5	1123.4	1120.5
383	U1541	C	4	H	6	103	104	31.65	31.301	This study	3.89		1123.9	1124.9	1120.5		1124		1120.8	1123.7	1118.5						1124.3	1125.2	1122.5
383	U1541	C	4	H	6	108	109	31.7	31.351	This study	3.936		1126	1125.4	1126		1128		1124.3	1124.9	1121.3						1126	1126	1125.7
383	U1541	C	5	H	1	15	16	32.75	32.901	This study	4.278		1198	1198.3	1198		1195.81		1198	1198	1198						1198	1198	1198
383	U1541	C	5	H	1	20	21	32.8	32.951	This study	4.25		1199	1200	1198.7		1198		1198.6	1198.9	1198.6						1198.7	1199.3	1198.7
383	U1541	C	5	H	1	25	26	32.85	33.001	This study	4.097		1200.3	1201.7	1199.3		1199.08		1199.5	1200	1199.1						1200	1201	1199.3
383	U1541	C	5	H	1	30	31	32.9	33.051	This study	4.095		1201.7	1203	1200.3		1200.16		1200.2	1201	1199.7						1201	1202	1200
383	U1541	C	5	H	1	35	36	32.95	33.101	This study	4.112		1203	1204.3	1201.3		1201.24		1201	1202.1	1200.6						1202	1203	1201.3
383	U1541	C	5	H	1	40	41	33	33.151	This study	3.915		1205	1206	1202.3		1202.32		1202.2	1203	1201.5						1203.3	1204	1202.3
383	U1541	C	5	H	1	45	46	33.05	33.201	This study	4.119		1205.7	1207.3	1203.3		1203.41		1203.4	1204.1	1202.4						1204	1205	1203.3
383	U1541	C	5	H	1	50	51	33.1	33.251	This study	4.097		1207	1208.3	1204.3		1204.49		1204.5	1204.8	1203.4						1205	1205.7	1204.3
383	U1541	C	5	H	1	65	66	33.25	33.401	This study	4.054		1208.7	1210.4	1206.3		1207.73		1207	1207.4	1205.4						1206.7	1207.3	1206
383	U1541	C	5	H	1	80	81	33.4	33.551	This study	4.04		1210.7	1212.4	1208.7		1210.97		1208.5	1209.1	1207.2						1208.7	1209	1207.7
383	U1541	C	5	H	1	95	96	33.55	33.701	This study	3.855		1212.4	1214.7	1210.7		1214.22		1210.4	1211.3	1209.1						1210.7	1210.7	1209.7
383	U1541	C	5	H	1	110	111	33.7	33.851	This study	3.893		1214.4	1216.4	1212.7		1217.46		1212	1213.1	1210.6						1212.4	1212.4	1211.7
383	U1541	C	5	H	1	125	126	33.85	34.001	This study	3.855		1216.4	1218.4	1214.7		1220.7		1213.9	1215	1212.4						1215.7	1216.7	1215.7
383	U1541	C	5	H	1	130	131	33.9	34.051	This study	3.822		1217.4	1219.4	1215.7		1221.78		1214.8	1216.8	1213.5						1216.7	1217.7	1216.4
383	U1541	C	5	H	1	135	136	33.95	34.101	This study	3.821		1218.7	1220.4	1216.7		1222.86		1216.1	1219.1	1214.6						1218	1219	1217
383	U1541	C	5	H	1	140	141	34	34.151	This study	3.662		1219.7	1221.4	1218		1223.95		1217.8	1220.2	1215.9						1218.7	1220.7	1218
383	U1541	C	5	H	1	145	146	34.05	34.201	This study	3.797		1220.7	1222.4	1219.4		1225.03		1219.4	1221.3	1217.6						1219.7	1221.7	1219
383	U1541	C	5	H	2	5	6	34.15	34.301	This study	3.544		1222.7	1224	1221		1227.19		1221.6	1223.3	1220.2						1222	1224	1220.7
383	U1541	C	5	H	2	10	11	34.2	34.351	This study	3.575		1223.7	1225.4	1222		1228.27		1222.7	1224.6	1221.5						1223	1225	1222
383	U1541	C	5	H	2	15	16	34.25	34.401	This study	3.289		1225	1226.7	1223.4		1229.35		1224.2	1225.7	1223.1						1224.7	1226.7	1223.7
383	U1541	C	5	H	2	20	21	34.3	34.451	This study	3.439		1226	1228.4	1224.7		1230.43		1225.5	1227	1224						1226	1228	1224.7
383	U1541	C	5	H	2	25	26	34.35	34.501	This study	3.175		1227.4	1229.7	1225.7		1231.51		1227	1228.1	1225.3						1227.4	1229.7	1226.4
383	U1541	C	5	H	2	30	31	34.4	34.551	This study	3.413		1228.7	1231.4	1227		1232.59		1228.3	1228.8	1226.6						1229.4	1230.7	1227.7
383	U1541	C	5	H	2	35	36	34.45	34.601	This study	3.126		1229.7	1232.7	1228.7		1233.68		1229.4	1230.5	1227.9						1230.7	1232	1229.4
383	U1541	C	5	H	2	40	41	34.5	34.651	This study	3.12		1231.4	1233.7	1230		1234.76		1230.7	1231.8	1229.2						1232	1233.4	1230.7
383	U1541	C	5	H	2	45	46	34.55	34.701	This study	3.1335		1232.7	1235.1	1231.4		1235.84		1232	1232.9	1230.7						1233.4	1234.7	1232
383	U1541	C	5	H	2	50	51	34.6	34.751	This study	3.127		1234.1	1236.4	1232.7		1236.92		1233.1	1234.4	1231.8						1234.4	1236.1	1233.1
383	U1541	C	5	H	2	55	56	34.65	34.801	This study	3.095		1235.7	1237.7	1234.1		1238		1234.4	1235.7	1233.1						1235.7	1237.4	1234.4
383	U1541	C	5	H	2	60	61	34.7	34.851	This study	3.23		1237.1	1238.7	1235.4		1239.43		1235.9	1237	1234.6						1237.1	1238.7	1235.7
383	U1541	C	5	H	2	65	66	34.75	34.901	This study	3.111		1238.4	1240.1	1236.7		1240.86		1237.2	1238.1	1236						1238.7	1239.7	1237.1
383	U1541	C	5	H	2	70	71	34.8	34.951	This study	3.188		1239.7	1241.4	1238.4		1242.29		1238.4	1239.2	1237.5						1239.7	1241.1	1238.7
383	U1541	C	5	H	2	75	76	34.85	35.001	This study	3.122		1241.4	1242.4	1239.7		1243.71		1239.9	1240.7	1239.2						1241.4	1242.4	1240.1
383	U1541	C	5	H	2	80	81	34.9	35.051	This study	3.48		1243.1	1243.7	1241.7		1245.14		1241.2	1242	1241						1242.7	1243.4	1241.7
383	U1541	C	5	H	2	85	86	34.95	35.101	This study	2.995		1244.4	1244.7	1243.1		1246.57		1242.7	1242.9	1242.1						1244.4	1244.4	1243.4
383	U1541	C	5	H	2	90	91	35	35.151	This study	4.147		1246.1	1247.7	1245.1		1248		1247.3	1248.1	1247.1						1246.4	1248.4	1245.7
383	U1541	C	5	H	2	95	96	35.05	35.201	This study	4.113		1247.7	1249.7	1246.4		1249.39		1248.8	1249.7	1247.9						1248.1	1251.1	1246.7
383	U1541	C	5	H	2	100	101	35.1	35.251	This study	4.047		1249.4	1251.7	1248.1		1250.78		1249.9	1251	1248.8						1250.1	1254.4	1248.1
383	U1541	C	5	H	2	105	106	35.15	35.301	This study	4.048		1250.7	1253.7	1249.4		1252.17		1251.2	1252.5	1250.1						1252.4	1257.1	1250.1
383	U1541	C	5	H	2	110	111	35.2	35.351	This study	3.968		1252.4	1255.4	1251.1		1253.57		1252.7	1254	1251.6						1254.1	1258.8	1252.1
383	U1541	C	5	H	2	120	121	35.3	35.451	This study	3.824		1255.8	1257.8	1255.1		1256.35		1255.3	1256.2	1255.1						1258.1	1260.8	1257.8
383	U1541	C	5	H	2	125	126	35.35	35.501	This study	3.868		1257.1	1258.8	1256.1		1257.74		1256.7	1256.9	1255.8						1259.4	1262.1	1258.8
383	U1541	C	5	H	2	145	146	35.55	35.701	This study	3.76		1260.4	1262.1	1258.8		1263.3		1261.5	1262.6	1258.8						1263.1	1265.4	1261.4
383	U1541	C	5	H	3	5	6	35.65	35.801	This study	3.7		1262.8	1264.4	1261.4		1266.09		1263.6	1264.9	1261.5						1265.4	1267.4	1263.8
383	U1541	C	5	H	3	10	11	35.7	35.851	This study	3.637		1264.1	1265.4	1262.8		1267.48		1264.9	1266.3	1263.2						1266.8	1268.8	1265.1
383	U1541	C	5	H	3	15	16	35.75	35.901	This study	3.569		1265.4	1266.8	1263.8		1268.87		1266.1	1267.6	1264.5						1268.4	1270.1	1266.8
383	U1541	C	5	H	3	20	21	35.8	35.951	This study	3.686		1266.4	1268.1	1265.1		1270.26		1267.4	1268.9	1266						1270.1	1271.4	1268.4
383	U1541	C	5	H	3	25	26	35.85	36.001	This study	3.556		1267.8	1269.1	1266.4		1271.65		1268.7	1270.4	1267.3						1271.4	1272.8	1269.8
383	U1541	C	5	H	3	30	31	35.9	36.051	This study	3.448		1269.1	1270.4	1267.8		1273.04		1269.8	1271.7	1268.4						1272.8	1274.1	1271.4
383	U1541	C	5	H	3	35	36	35.95	36.101	This study	3.533		1270.4	1271.4	1268.8		1274.43		1271	1273.2	1269.5						1274.1	1275.4	1272.8
383	U1541	C	5	H	3	40	41	36	36.151	This study	3.66		1271.8	1272.8	1270.1		1275.83		1272.1	1274.3	1270.8						1275.4	1276.8	1274.1
383	U1541	C	5	H	3	45	46	36.05	36.201	This study	3.429		1273.1	1274.4	1271.4		1277.22		1273.2	1275.6	1272.1						1277.1	1278.1	1275.4
383	U1541	C	5	H	3	50	51	36.1	36.251	This study	3.477		1274.4	1275.8	1272.8		1278.61		1274.5	1276.7	1273.4						1278.5	1279.5	1276.8
383	U1541	C	5	H	3	55	56	36.15	36.301	This study	3.344		1275.8	1277.1	1274.1		1280		1275.9	1277.6	1275						1279.8	1281.1	1278.1
383	U1541	C	5	H	3	60	61	36.2	36.351	This study	3.481		1277.1	1278.5	1275.4		1281.11		1276.9	1278.7	1276.3						1281.1	1282.1	1279.5
383	U1541	C	5	H	3	65	66	36.25	36.401	This study	3.424		1278.8	1279.8	1276.8		1282.22		1278.5	1280	1277.6						1282.5	1283.5	1280.8
383	U1541	C	5	H	3	70	71	36.3	36.451	This study	3.342		1280.1	1281.5	1278.5		1283.33		1280	1281.3	1279.3						1283.8	1284.5	1282.5
383	U1541	C	5	H	3	75	76	36.35	36.501	This study	3.447		1281.5	1282.8	1279.8		1284.44		1281.7	1282.6	1281.1						1285.1	1285.8	1283.8
383	U1541	C	5	H	3	80	81	36.4	36.551	This study	3.536		1283.1	1284.1	1281.5		1285.56		1283.1	1283.9	1283.1						1286.8	1287.8	1285.1
383	U1541	C	5	H	3	85	86	36.45	36.601	This study	3.63		1284.5	1285.5	1283.1		1286.67		1284.1	1285.4	1283.7						1288.5	1289.5	1286.8
383	U1541	C	5	H	3	90	91	36.5	36.651	This study	3.4825		1285.8	1286.8	1284.5		1287.78		1285	1286.5	1284.6						1290.1	1290.8	1288.5
383	U1541	C	5	H	3	95	96	36.55	36.701	This study	3.882		1287.5	1288.5	1286.1		1288.89		1287.2	1287.9	1287						1291.8	1293.1	1290.8
383	U1541	C	5	H	3	100	101	36.6	36.751	This study	3.982		1288.8	1290.1	1287.5		1290		1288.7	1289.8	1287.9						1293.1	1294.8	1291.8
383	U1541	C	5	H	3	105	106	36.65	36.801	This study	3.995		1290.1	1292.1	1288.8		1291.69		1290.2	1290.9	1289.4						1295.1	1296.5	1293.5
383	U1541	C	5	H	3	110	111	36.7	36.851	This study	3.907		1291.8	1293.8	1290.8		1293.38		1291.5	1292.6	1291.1						1296.8	1298.1	1294.8
383	U1541	C	5	H	3	115	116	36.75	36.901	This study	3.785		1293.1	1295.8	1292.1		1295.08		1292.9	1294	1292						1298.8	1299.5	1296.5
383	U1541	C	5	H	3	120	121	36.8	36.951	This study	3.648		1294.8	1297.8	1293.8		1296.77		1294.6	1295	1293.5						1300.8	1301.5	1298.8
383	U1541	C	5	H	3	125	126	36.85	37.001	This study	3.778		1296.5	1299.1	1295.1		1298.46		1297.9	1300.3	1294.8						1302.2	1303.2	1299.5
383	U1541	C	5	H	3	130	131	36.9	37.051	This study	3.694		1298.1	1301.1	1297.1		1300.15		1300.1	1302.3	1298.1						1303.5	1304.8	1301.1
383	U1541	C	5	H	3	140	141	37	37.151	This study	3.748		1301.1	1304.2	1299.5		1303.54		1302.7	1304.7	1300.9						1306.2	1307.8	1304.2
383	U1541	C	5	H	3	145	146	37.05	37.201	This study	3.714		1302.8	1306.2	1301.1		1305.23		1304	1306	1302.3						1307.8	1309.2	1305.8
383	U1541	C	5	H	4	5	6	37.15	37.301	This study	3.59		1306.2	1311.5	1304.2		1308.62		1306.6	1308.6	1305.5						1310.5	1312.2	1308.5
383	U1541	C	5	H	4	10	11	37.2	37.351	This study	3.468		1308.2	1314.5	1306.2		1310.31		1308.4	1310.5	1307.3						1311.8	1313.8	1310.2
383	U1541	C	5	H	4	15	16	37.25	37.401	This study	3.358		1310.5	1316.8	1307.5		1312		1310.7	1312.5	1309.2						1313.2	1315.2	1311.8
383	U1541	C	5	H	4	20	21	37.3	37.451	This study	3.476		1313.8	1319.5	1309.5		1313.67		1313.2	1314.9	1310.7						1315.2	1316.5	1313.5
383	U1541	C	5	H	4	25	26	37.35	37.501	This study	3.459		1317.5	1321.2	1311.5		1315.33		1314.9	1318.8	1313.1						1316.5	1317.8	1314.8
383	U1541	C	5	H	4	30	31	37.4	37.551	This study	3.483		1320.8	1322.8	1313.8		1317		1318.6	1321.9	1317.1						1318.2	1319.2	1316.8
383	U1541	C	5	H	4	35	36	37.45	37.601	This study	3.837		1323.2	1324.9	1317.2		1318.67		1323.2	1324.5	1321						1319.8	1321.2	1318.5
383	U1541	C	5	H	4	40	41	37.5	37.651	This study	3.61		1324.5	1326.5	1319.2		1320.33		1324.9	1326.2	1322.8						1321.5	1322.8	1320.2
383	U1541	C	5	H	4	45	46	37.55	37.701	This study	3.808		1326.2	1327.9	1321.2		1322		1326.4	1327.7	1324.7						1323.2	1324.9	1321.5
383	U1541	C	5	H	4	50	51	37.6	37.751	This study	3.876		1327.9	1329.2	1323.2		1323.67		1327.7	1328.9	1326						1324.9	1326.9	1323.5
383	U1541	C	5	H	4	55	56	37.65	37.801	This study	3.809		1329.2	1330.5	1323.8		1325.33		1328.9	1330.2	1327.7						1326.9	1328.2	1324.9
383	U1541	C	5	H	4	60	61	37.7	37.851	This study	3.846		1330.9	1331.9	1325.2		1327		1330.2	1331.5	1328.8						1330.5	1331.2	1326.9
383	U1541	C	5	H	4	65	66	37.75	37.901	This study	3.481		1332.2	1332.9	1326.5		1328.67		1331.3	1332.8	1330.1						1331.9	1332.2	1331.5
383	U1541	C	5	H	4	70	71	37.8	37.951	This study	3.743		1333.9	1334.9	1327.9		1330.33		1332.5	1334.3	1331.3						1333.2	1334.5	1332.5
383	U1541	C	5	H	4	75	76	37.85	38.001	This study	3.804		1335.5	1337.2	1329.5		1332		1333.7	1336	1332.5						1334.5	1336.2	1333.5
383	U1541	C	5	H	4	81	82	37.9	38.051	This study	3.744		1337.2	1338.9	1330.9		1333.67		1334.9	1337.6	1333.9						1335.9	1337.5	1334.5
383	U1541	C	5	H	4	85	86	37.95	38.101	This study	3.784		1338.9	1340.5	1332.2		1335.33		1336.3	1338.9	1335.2						1337.2	1339.2	1335.9
383	U1541	C	5	H	4	90	91	38	38.151	This study	3.779		1340.2	1342.2	1333.5		1337		1337.4	1340.4	1336.5						1338.2	1340.9	1336.9
383	U1541	C	5	H	4	95	96	38.05	38.201	This study	3.722		1341.9	1343.9	1334.9		1338.67		1338.7	1341.7	1337.8						1339.9	1343.2	1338.5
383	U1541	C	5	H	4	105	106	38.15	38.301	This study	3.914		1344.5	1346.5	1338.5		1342		1340.9	1343	1339.8						1342.2	1347.9	1340.2
383	U1541	C	5	H	5	19	20	38.4	38.551	This study	3.422		1348.9	1352.2	1345.9		1350.33		1347.8	1350.2	1345.6						1348.6	1353.9	1345.9
383	U1541	C	5	H	5	24	25	38.45	38.601	This study	3.007		1350.9	1353.9	1347.6		1352		1349.3	1351.7	1347.2						1350.2	1359.9	1349.6
383	U1541	C	5	H	5	29	30	38.5	38.651	This study	3.385		1352.6	1354.9	1349.6		1353.67		1350.7	1353	1349.3						1352.9	1362.2	1350.9
383	U1541	C	5	H	5	34	35	38.55	38.701	This study	3.098		1354.6	1357.6	1351.9		1355.33		1353	1354.6	1351.3						1355.9	1363.9	1353.9
383	U1541	C	5	H	5	39	40	38.6	38.751	This study	3.08567		1356.9	1360.2	1354.6		1357		1354.8	1356.8	1353.3						1361.2	1365.2	1358.6
383	U1541	C	5	H	5	44	45	38.65	38.801	This study	3.211		1359.9	1362.6	1357.2		1358.67		1357.8	1360.7	1355.9						1364.9	1366.9	1362.6
383	U1541	C	5	H	5	49	50	38.7	38.851	This study	3.733		1363.2	1365.6	1361.2		1360.33		1363.7	1365	1363.1						1368.6	1370.9	1367.2
383	U1541	C	5	H	5	54	55	38.75	38.901	This study	3.818		1365.9	1368.2	1363.9		1362		1365.7	1366.6	1365						1371.6	1373.3	1369.6
383	U1541	C	5	H	5	59	60	38.8	38.951	This study	3.8655		1367.6	1370.3	1365.6		1363.67		1367.4	1368.1	1366.6						1373.3	1374.6	1371.3
383	U1541	C	5	H	5	64	65	38.85	39.001	This study	3.875		1369.2	1372.3	1367.2		1365.33		1368.7	1369.2	1367.9						1374.6	1376.3	1373.3
383	U1541	B	5	H	1	95	96	36.55	39.051	This study	3.695		1370.6	1373.6	1368.6		1367		1370.1	1370.9	1369.4						1376.3	1377.3	1374.6
383	U1541	B	5	H	1	100	101	36.6	39.101	This study	3.913		1371.9	1375.3	1369.9		1368.67		1371.6	1372.3	1371.1						1377.6	1378.9	1376.6
383	U1541	B	5	H	1	110	111	36.7	39.201	This study	3.944		1374.6	1377.9	1372.6		1372		1374.4	1374.9	1373.1						1380.6	1381.6	1378.9
383	U1541	B	5	H	1	115	116	36.75	39.251	This study	3.835		1376.3	1379.3	1373.9		1374.17		1376	1376.8	1374.7						1381.9	1383.3	1380.6
383	U1541	B	5	H	1	120	121	36.8	39.301	This study	3.901		1377.9	1380.6	1375.6		1376.33		1377.3	1378.1	1376						1383.3	1384.6	1381.9
383	U1541	B	5	H	1	125	126	36.85	39.351	This study	3.841		1379.6	1381.9	1376.9		1378.5		1378.8	1379.5	1377.5						1384.9	1385.9	1383.6
383	U1541	B	5	H	1	130	131	36.9	39.401	This study	3.851		1380.9	1382.9	1379.3		1380.67		1380.3	1380.8	1379						1386.3	1387.3	1385.3
383	U1541	B	5	H	1	135	136	36.95	39.451	This study	3.616		1382.3	1384.6	1380.6		1382.83		1381.8	1382.7	1381						1387.6	1388.6	1386.6
383	U1541	B	5	H	1	140	141	37	39.501	This study	3.574		1383.6	1386.6	1382.3		1385		1383.4	1384.7	1382.1						1388.9	1390.3	1388.3
383	U1541	B	5	H	1	145	146	37.05	39.551	This study	3.646		1384.9	1387.9	1383.6		1387.17		1384.9	1386.9	1383.6						1390.3	1394.3	1389.6
383	U1541	B	5	H	2	5	6	37.15	39.651	This study	3.428		1388.6	1391.6	1386.3		1391.5		1389.9	1393.6	1386.2						1394.3	1397.6	1393.3
383	U1541	B	5	H	2	10	11	37.2	39.701	This study	3.236		1390.6	1392.9	1387.9		1393.67		1392.5	1396.2	1388.4						1396.3	1399	1395
383	U1541	B	5	H	2	15	16	37.25	39.751	This study	3.277		1392.9	1395.6	1389.6		1395.83		1395.4	1398.2	1391.7						1398.6	1401	1396.6
383	U1541	B	5	H	2	20	21	37.3	39.801	This study	3.15933		1395.3	1397	1391.6		1398		1398	1400.2	1396.4						1400.3	1402.3	1398.6
383	U1541	B	5	H	2	25	26	37.35	39.851	This study	3.285		1397.3	1399	1394		1399.27		1400.2	1402.1	1398.8						1402.3	1403.6	1400.3
383	U1541	B	5	H	2	30	31	37.4	39.901	This study	3.288		1399	1401	1397.3		1400.55		1402.4	1403.9	1401						1404	1405	1402.6
383	U1541	B	5	H	2	35	36	37.45	39.951	This study	3.6565		1400.6	1402.3	1399.3		1401.82		1404.7	1405.6	1403						1405.6	1406.3	1404.6
383	U1541	B	5	H	2	40	41	37.5	40.001	This study	3.694		1402.6	1404	1400.6		1403.09		1406	1406.9	1403.7						1406.6	1407.3	1405.6
383	U1541	B	5	H	2	45	46	37.55	40.051	This study	3.232		1404.3	1405.3	1402.6		1404.36		1407.3	1408	1404.7						1407.6	1408.3	1406.3
383	U1541	B	5	H	2	50	51	37.6	40.101	This study	3.729		1406	1407.3	1404		1405.64		1408.4	1408.9	1406						1409	1409.3	1407.6
383	U1541	B	5	H	2	55	56	37.65	40.151	This study	3.8025		1407.6	1409	1405.6		1406.91		1409.5	1410.2	1407.1						1410.3	1411.3	1409
383	U1541	B	5	H	2	60	61	37.7	40.201	This study	3.889		1409.3	1410.6	1407.3		1408.18		1410.6	1410.9	1408.4						1411.3	1412.6	1410
383	U1541	B	5	H	2	65	66	37.75	40.251	This study	3.95		1411	1412.3	1409		1409.45		1411.9	1412.6	1409.5						1412.6	1414	1411
383	U1541	B	5	H	2	70	71	37.8	40.301	This study	3.909		1412.3	1414	1410.6		1410.73		1413.2	1413.9	1410.6						1414	1415.3	1412.6
383	U1541	B	5	H	2	75	76	37.85	40.351	This study	4.016		1414	1415.3	1412		1412		1414.3	1414.8	1411.9						1415.3	1416.3	1414
383	U1541	B	5	H	2	80	81	37.9	40.401	This study	3.814		1415.6	1417.3	1413.6		1413.85		1415.4	1416.1	1413.3						1416.7	1418	1415.3
383	U1541	B	5	H	2	85	86	37.95	40.451	This study	3.865		1417.3	1419	1415.3		1415.69		1416.5	1416.9	1414.6						1417.7	1419.3	1416.7
383	U1541	B	5	H	2	90	91	38	40.501	This study	3.681		1419	1420.7	1417.3		1417.54		1418	1418.7	1416.3						1419.3	1420.7	1418
383	U1541	B	5	H	2	95	96	38.05	40.551	This study	3.715		1420.7	1422.3	1419.3		1419.38		1419.3	1420	1417.8						1420.7	1422	1419.3
383	U1541	B	5	H	2	100	101	38.1	40.601	This study	3.638		1422	1423.7	1421		1421.23		1420.4	1421.3	1419.3						1422	1423	1420.7
383	U1541	B	5	H	2	105	106	38.15	40.651	This study	3.532		1423.7	1425.3	1422.3		1423.08		1421.7	1422.6	1421.1						1423.3	1424.3	1422.3
383	U1541	B	5	H	2	110	111	38.2	40.701	This study	3.644		1425	1426.7	1424		1424.92		1423	1424.1	1422.4						1424.3	1425.3	1423.3
383	U1541	B	5	H	2	115	116	38.25	40.751	This study	3.343		1426.7	1428	1425.3		1426.77		1424.2	1425.4	1423.7						1426.3	1427.3	1425
383	U1541	B	5	H	2	120	121	38.3	40.801	This study	3.438		1428.3	1429.7	1427		1428.62		1425.9	1426.8	1425.4						1428	1429.3	1426.7
383	U1541	B	5	H	2	125	126	38.35	40.851	This study	3.236		1429.7	1431.7	1428.7		1430.46		1427.6	1429.8	1427						1429.3	1430.7	1428.7
383	U1541	B	5	H	2	130	131	38.4	40.901	This study	3.148		1431.7	1434.3	1430		1432.31		1429.2	1432.6	1428.5						1431	1432.3	1430
383	U1541	B	5	H	2	135	136	38.45	40.951	This study	3.346		1433.3	1436.3	1431.3		1434.15		1430.7	1435.1	1430						1432.3	1434.3	1431.3
383	U1541	B	5	H	2	140	141	38.5	41.001	This study	2.988		1435	1439.4	1433		1436		1434	1438.8	1431.6						1434.3	1440.7	1433
383	U1541	B	5	H	3	5	6	38.65	41.151	This study	3.069		1440.4	1446.4	1437		1446		1443.1	1446.8	1439.2						1444	1447.4	1439.4
383	U1541	B	5	H	3	10	11	38.7	41.201	This study	3.018		1442.7	1448.7	1438.7		1449.33		1446.4	1448.6	1442.7						1447.4	1449.4	1443.7
383	U1541	B	5	H	3	15	16	38.75	41.251	This study	3.131		1444.7	1450.4	1440		1452.67		1449.4	1450.3	1446.2						1450.4	1451.4	1449
383	U1541	B	5	H	3	20	21	38.8	41.301	This study	3.792		1447.7	1453	1442		1456		1451	1451.4	1451						1459	1460.7	1457.4
383	U1541	B	5	H	3	25	26	38.85	41.351	This study	3.406		1449.7	1454.7	1445		1457.33		1451.9	1452.9	1451.6						1466.1	1466.7	1464.7
383	U1541	B	5	H	3	30	31	38.9	41.401	This study	3.56		1452.4	1457	1448		1458.67		1452.9	1454	1452.1						1468.7	1469.4	1466.4
383	U1541	B	5	H	3	35	36	38.95	41.451	This study	3.394		1454.4	1461	1451		1460		1454.5	1454.9	1452.9						1470.7	1471.4	1467.4
383	U1541	B	5	H	3	40	41	39	41.501	This study	3.751		1456.4	1463.1	1453.4		1461.33		1459.5	1461.4	1454.3						1471.7	1472.4	1468.4
383	U1541	B	5	H	3	45	46	39.05	41.551	This study	3.718		1458.7	1464.7	1455.7		1462.67		1461.7	1462.8	1459.3						1473.1	1473.7	1469.4
383	U1541	B	5	H	3	60	61	39.2	41.701	This study	3.6935		1465.7	1470.1	1463.1		1466.67		1466.2	1467.1	1465.2						1475.1	1476.7	1473.4
383	U1541	B	5	H	3	65	66	39.25	41.751	This study	3.428		1468.1	1472.4	1465.1		1468		1467.8	1468.6	1467.1						1476.7	1478.4	1474.7
383	U1541	B	5	H	3	70	71	39.3	41.801	This study	3.221		1471.7	1476.1	1466.7		1470.33		1469.3	1470	1468.8						1478.4	1480.7	1476.4
383	U1541	B	5	H	3	75	76	39.35	41.851	This study	3.538		1475.4	1478.7	1468.1		1472.67		1470.8	1471	1470						1480.1	1483.1	1477.7
383	U1541	B	5	H	3	80	81	39.4	41.901	This study	3.12		1478.1	1482.4	1470.1		1475		1472.4	1476	1471.3						1484.4	1490.1	1479.7
383	U1541	B	5	H	3	85	86	39.45	41.951	This study	3.306		1480.7	1484.7	1472.1		1477.33		1474.8	1480	1472.6						1489.4	1497.4	1481.7
383	U1541	B	5	H	3	90	91	39.5	42.001	This study	3.198		1483.7	1486.1	1474.1		1479.67		1479.5	1482.8	1474.7						1496.1	1500.4	1484.4
383	U1541	B	5	H	3	95	96	39.55	42.051	This study	3.22		1485.8	1487.8	1476.7		1482		1482.6	1484.8	1477.2						1499.4	1503.4	1490.4
383	U1541	B	5	H	3	100	101	39.6	42.101	This study	3.041		1487.4	1489.1	1479.4		1484.33		1485.4	1487.2	1480						1502.4	1505.4	1496.8
383	U1541	B	5	H	3	105	106	39.65	42.151	This study	3.016		1489.4	1490.8	1483.7		1486.67		1488	1488.9	1483.5						1506.1	1508.1	1501.4
383	U1541	B	5	H	3	110	111	39.7	42.201	This study	3.273		1491.4	1492.8	1488.4		1489		1490.2	1491.5	1489.1						1509.8	1511.8	1507.4
383	U1541	B	5	H	3	115	116	39.75	42.251	This study	3.7485		1493.1	1495.8	1491.1		1491.33		1493.1	1493.9	1491.1						1514.1	1517.1	1510.1
383	U1541	B	5	H	3	120	121	39.8	42.301	This study	3.569		1494.8	1502.1	1493.1		1493.67		1494.8	1495	1492.8						1521.8	1523.8	1511.8
383	U1541	B	5	H	3	125	126	39.85	42.351	This study	3.997		1498.4	1505.4	1495.4		1496		1497.4	1501.8	1495.3						1529.8	1531.5	1513.1
383	U1541	B	5	H	3	130	131	39.9	42.401	This study	3.903		1501.8	1507.4	1497.4		1499		1501.8	1504.3	1497.5						1532.8	1535.2	1514.1
383	U1541	B	5	H	3	135	136	39.95	42.451	This study	3.783		1505.1	1509.8	1500.1		1502		1504.7	1506.5	1503.8						1535.5	1538.8	1515.1
383	U1541	B	5	H	3	140	141	40	42.501	This study	3.862		1507.8	1511.1	1503.4		1505		1507.5	1508.7	1505.7						1538.2	1540.5	1516.1
383	U1541	B	5	H	3	145	146	40.05	42.551	This study	3.785		1510.5	1513.5	1507.1		1508		1510	1511.2	1507.9						1540.2	1542.2	1517.1
383	U1541	B	5	H	4	5	6	40.15	42.651	This study	3.517		1514.8	1517.5	1511.8		1514		1516.3	1518.7	1512.2						1543.2	1545.5	1520.1
383	U1541	B	5	H	4	10	11	40.2	42.701	This study	3.374		1517.1	1519.8	1513.8		1517		1519.3	1522	1514.6						1544.8	1547.2	1521.5
383	U1541	B	5	H	4	15	16	40.25	42.751	This study	3.361		1518.8	1521.8	1515.5		1520		1522	1524.2	1517.7						1546.5	1548.8	1523.1
383	U1541	B	5	H	4	20	21	40.3	42.801	This study	3.387		1521.1	1524.1	1518.1		1522.5		1524.6	1525.9	1521.4						1548.5	1550.5	1524.8
383	U1541	B	5	H	4	25	26	40.35	42.851	This study	3.556		1523.5	1527.8	1520.1		1525		1526.5	1527.5	1524.6						1550.2	1551.8	1526.8
383	U1541	B	5	H	4	30	31	40.4	42.901	This study	3.549		1525.1	1530.8	1522.1		1527.5		1527.9	1529.3	1526.7						1551.8	1553.2	1528.1
383	U1541	B	5	H	4	35	36	40.45	42.951	This study	3.9185		1527.5	1535.5	1524.5		1530		1529.3	1531.3	1528.3						1553.8	1555.2	1529.8
383	U1541	B	5	H	4	40	41	40.5	43.001	This study	3.766		1529.8	1539.2	1526.5		1532.5		1530.5	1531.8	1529.7						1555.9	1557.5	1531.5
383	U1541	B	5	H	4	45	46	40.55	43.051	This study	4.027		1532.8	1543.5	1529.1		1535		1531.8	1532.6	1531.3						1558.9	1560.2	1533.2
383	U1541	B	5	H	4	55	56	40.65	43.151	This study	3.111		1538.2	1550.2	1535.5		1541.25		1533.6	1533.6	1532.8						1567.2	1569.2	1536.2
383	U1541	B	5	H	4	60	61	40.7	43.201	This study	3.862		1542.5	1552.2	1538.8		1544.38		1538.7	1541.5	1536.4						1571.9	1574.9	1538.5
383	U1541	B	5	H	4	65	66	40.75	43.251	This study	3.672		1545.5	1553.8	1543.8		1547.5		1544.4	1545.8	1543.8						1574.9	1577.9	1540.8
383	U1541	B	5	H	4	70	71	40.8	43.301	This study	3.547		1548.8	1555.5	1545.5		1549.25		1546.6	1547.5	1546.4						1577.9	1580.6	1543.5
383	U1541	B	5	H	4	75	76	40.85	43.351	This study	3.708		1551.8	1557.2	1547.2		1551		1548.1	1548.7	1547.4						1580.6	1582.2	1547.5
383	U1541	B	5	H	4	80	81	40.9	43.401	This study	3.525		1554.2	1558.5	1549.2		1552.75		1549.5	1550.1	1548.9						1582.2	1583.6	1550.2
383	U1541	B	5	H	4	85	86	40.95	43.451	This study	3.976		1556.5	1560.2	1551.2		1554.5		1550.9	1551.1	1550.1						1583.9	1584.9	1553.5
383	U1541	B	5	H	4	90	91	41	43.501	This study	3.361		1558.9	1561.9	1553.2		1556.25		1553.4	1556.2	1551.7						1585.6	1586.6	1556.2
383	U1541	B	5	H	4	95	96	41.05	43.551	This study	3.506		1560.5	1563.2	1555.2		1558		1558.2	1560.3	1553.8						1586.9	1588.2	1558.9
383	U1541	B	5	H	4	100	101	41.1	43.601	This study	3.228		1562.5	1564.9	1557.9		1559.75		1561.5	1562.7	1555.6						1588.6	1589.9	1561.9
383	U1541	B	5	H	4	105	106	41.15	43.651	This study	3.314		1563.9	1566.2	1559.9		1561.5		1563.1	1564.2	1561.3						1589.9	1591.6	1563.9
383	U1541	B	5	H	4	110	111	41.2	43.701	This study	3.294		1565.9	1567.9	1562.5		1563.25		1564.4	1565.6	1563.1						1591.2	1593.2	1565.5
383	U1541	B	5	H	4	115	116	41.25	43.751	This study	3.256		1567.9	1569.5	1564.9		1565		1566	1566.8	1565						1592.9	1594.9	1567.9
383	U1541	B	5	H	4	120	121	41.3	43.801	This study	3.6		1569.9	1571.5	1567.2		1567.81		1568.8	1569.7	1567.4						1594.6	1596.2	1570.5
383	U1541	B	5	H	4	125	126	41.35	43.851	This study	3.686		1572.9	1576.2	1570.2		1570.62		1570.9	1572.5	1569.7						1596.2	1597.9	1572.5
383	U1541	B	5	H	4	130	131	41.4	43.901	This study	3.857		1576.2	1580.6	1572.5		1573.44		1573.5	1577.2	1571.9						1597.6	1599.6	1575.2
383	U1541	B	5	H	4	135	136	41.45	43.951	This study	3.817		1580.2	1584.6	1576.2		1576.25		1577	1581.3	1574.5						1599.2	1600.9	1579.9
383	U1541	B	5	H	4	140	141	41.5	44.001	This study	3.549		1583.9	1588.2	1581.6		1579.06		1580.1	1585.3	1578.8						1600.6	1602.9	1584.6
383	U1541	B	5	H	5	4	5	41.65	44.151	This study	3.299		1591.9	1595.6	1588.9		1587.5		1586.8	1595.9	1584.9						1604.6	1606.9	1593.2
383	U1541	B	5	H	5	9	10	41.7	44.201	This study	3.291		1595.2	1597.2	1591.6		1589.57		1588.6	1597	1587.2						1606.3	1608.6	1597.9
383	U1541	B	5	H	5	14	15	41.75	44.251	This study	3.407		1597.6	1599.6	1594.9		1591.65		1594.5	1598.6	1589.6						1607.6	1609.9	1602.3
383	U1541	B	5	H	5	19	20	41.8	44.301	This study	3.217		1599.2	1601.3	1597.6		1593.72		1597.6	1600	1596.3						1608.9	1611.3	1604.6
383	U1541	B	5	H	5	24	25	41.85	44.351	This study	3.232		1600.9	1603.3	1599.6		1595.79		1600.2	1601.2	1598						1610.6	1612.6	1606.3
383	U1541	B	5	H	5	29	30	41.9	44.401	This study	3.178		1602.3	1605.3	1600.9		1597.86		1602.3	1604.1	1599.6						1611.6	1613.3	1607.6
383	U1541	B	5	H	5	34	35	41.95	44.451	This study	3.24		1603.9	1607.3	1602.6		1599.94		1604.1	1605.5	1601.2						1612.9	1615.6	1609.3
383	U1541	B	5	H	5	39	40	42	44.501	This study	3.211		1605.6	1609.3	1603.9		1602.01		1605.7	1607.1	1604.5						1614.9	1617.3	1610.9
383	U1541	B	5	H	5	44	45	42.05	44.551	This study	3.371		1606.9	1610.9	1605.3		1604.08		1607.2	1608.4	1606.3						1616.3	1620.3	1612.6
383	U1541	B	5	H	5	49	50	42.1	44.601	This study	3.5125		1608.6	1615.9	1606.9		1606.16		1608.6	1609.8	1607.6						1618.3	1623	1613.9
383	U1541	B	5	H	5	54	55	42.15	44.651	This study	3.196		1610.6	1618.6	1608.9		1608.23		1610.2	1611.2	1609.2						1619.9	1625.6	1615.3
383	U1541	C	6	H	1	51	52	42.61	44.704	This study	3.512		1613.9	1621.6	1610.6		1610.43		1612	1615.3	1610.8						1621.3	1628.3	1616.9
383	U1541	C	6	H	1	56	57	42.66	44.754	This study	3.54		1615.9	1624.3	1612.3		1612.5		1613.5	1618.2	1612.2						1623	1630.3	1618.3
383	U1541	C	6	H	1	61	62	42.71	44.804	This study	3.453		1618.9	1626	1614.6		1615.16		1615.5	1623.2	1613.9						1625.6	1632.3	1619.9
383	U1541	C	6	H	1	66	67	42.76	44.854	This study	3.478		1620.9	1628.3	1616.6		1617.81		1617.9	1625.9	1615.5						1628.3	1633.6	1621.3
383	U1541	C	6	H	1	71	72	42.81	44.904	This study	3.379		1623.6	1630.6	1618.6		1620.47		1621	1631.4	1618.8						1631.6	1635.3	1623
383	U1541	C	6	H	1	76	77	42.86	44.954	This study	3.379		1626.3	1632.6	1620.3		1623.12		1623.7	1633.6	1620.8						1634.6	1638.3	1624.6
383	U1541	C	6	H	1	81	82	42.91	45.004	This study	3.193		1629.3	1634	1622.3		1625.78		1629.6	1635.3	1622.6						1636.6	1639.6	1626.3
383	U1541	C	6	H	1	86	87	42.96	45.054	This study	3.513		1632	1636	1624.3		1628.44		1632.6	1636.9	1625.1						1638.3	1641.3	1630.6
383	U1541	C	6	H	1	91	92	43.01	45.104	This study	3.27		1634.3	1637.6	1626.6		1631.09		1635.1	1638.7	1629.4						1640.3	1642.6	1635
383	U1541	C	6	H	1	96	97	43.06	45.154	This study	3.201		1637	1639.3	1629		1633.75		1637.7	1640	1633.4						1643	1644.3	1640.3
383	U1541	C	6	H	1	101	102	43.11	45.204	This study	3.586		1639.3	1641.6	1631.3		1636.41		1639.8	1641.6	1637.5						1645.6	1647	1644.6
383	U1541	C	6	H	1	106	107	43.16	45.254	This study	3.607		1640.6	1643.3	1633.6		1639.06		1641.4	1642.6	1639.1						1648.3	1649.3	1645.6
383	U1541	C	6	H	1	111	112	43.21	45.304	This study	3.488		1642.6	1645.6	1636.6		1641.72		1642.6	1643.6	1640.4						1653.7	1658	1647
383	U1541	C	6	H	1	116	117	43.26	45.354	This study	3.577		1644.3	1648	1639.3		1644.38		1643.6	1645.1	1641.6						1657.3	1659.3	1648.3
383	U1541	C	6	H	1	121	122	43.31	45.404	This study	3.571		1646.7	1651.7	1642.3		1647.03		1645.3	1646.1	1643.2						1659.3	1661	1649.3
383	U1541	C	6	H	1	131	132	43.41	45.504	This study	3.86		1652	1658.7	1647.3		1652.34		1650.3	1652.6	1646.7						1663	1665.3	1653.7
383	U1541	C	6	H	1	136	137	43.46	45.554	This study	3.939		1655.3	1661.7	1650.3		1655		1653.6	1655.9	1648.7						1665	1668	1656.7
383	U1541	C	6	H	1	141	142	43.51	45.604	This study	3.798		1658.3	1663.7	1652.7		1657.5		1656.9	1658.9	1650.3						1667	1670.7	1659.3
383	U1541	C	6	H	1	146	147	43.56	45.654	This study	3.898		1662	1666	1656.3		1660		1659.7	1661.6	1653.4						1669.7	1673.4	1663
383	U1541	C	6	H	2	5	6	43.66	45.754	This study	3.743		1667.3	1670.7	1663		1665		1664.8	1666.4	1661.8						1674.7	1677.4	1668.7
383	U1541	C	6	H	2	10	11	43.71	45.804	This study	3.632		1670.4	1673.7	1667		1667.5		1667.5	1669.5	1666.4						1677.4	1680	1674
383	U1541	C	6	H	2	15	16	43.76	45.854	This study	3.4355		1673	1676.7	1670		1670		1670.1	1671.9	1668.9						1680	1682.7	1677.7
383	U1541	C	6	H	2	20	21	43.81	45.904	This study	3.553		1676	1679.4	1672.4		1672.5		1672.8	1673.6	1671.3						1682	1685	1679.7
383	U1541	C	6	H	2	25	26	43.86	45.954	This study	3.212		1679	1682.4	1674.7		1675		1675.6	1680.1	1674						1684.7	1688.7	1682.4
383	U1541	C	6	H	2	30	31	43.91	46.004	This study	3.297		1681.4	1684.7	1676.4		1678.44		1680.5	1683.6	1677						1687.4	1690.7	1684.4
383	U1541	C	6	H	2	35	36	43.96	46.054	This study	3.307		1683.7	1687.7	1679.7		1681.88		1684.4	1686.8	1680.5						1690.4	1693.1	1687
383	U1541	C	6	H	2	40	41	44.01	46.104	This study	3.383		1686.4	1690.7	1682.7		1685.31		1688	1692.3	1684						1693.4	1695.1	1690
383	U1541	C	6	H	2	45	46	44.06	46.154	This study	3.613		1689.4	1694.1	1686.4		1688.75		1691.3	1695.4	1687						1696.1	1696.4	1694.7
383	U1541	C	6	H	2	50	51	44.11	46.204	This study	3.273		1692.7	1697.4	1688.4		1692.19		1693.7	1697.2	1689.9						1699.1	1699.4	1697.1
383	U1541	C	6	H	2	55	56	44.16	46.254	This study	3.514		1696.1	1700.1	1690.4		1695.62		1697.2	1698.6	1693.3						1701.7	1702.7	1699.7
383	U1541	C	6	H	2	65	66	44.26	46.354	This study	3.912		1702.7	1706.4	1699.1		1702.5		1706.2	1708.2	1701.5						1707.4	1708.4	1705.1
383	U1541	C	6	H	2	70	71	44.31	46.404	This study	3.66		1705.7	1708.7	1701.1		1704.44		1709.2	1710.1	1704.1						1709.1	1710.4	1707.7
383	U1541	C	6	H	2	75	76	44.36	46.454	This study	3.709		1708.4	1711.1	1705.1		1706.39		1710.7	1712.1	1708.8						1710.4	1712.1	1709.4
383	U1541	C	6	H	2	80	81	44.41	46.504	This study	3.51		1710.4	1713.7	1707.7		1708.33		1712.5	1713.9	1711.3						1711.7	1713.1	1710.7
383	U1541	C	6	H	2	85	86	44.46	46.554	This study	3.474		1712.4	1716.1	1709.7		1710.28		1713.9	1715.5	1712.9						1713.4	1714.8	1712.1
383	U1541	C	6	H	2	95	96	44.56	46.654	This study	3.31		1715.4	1720.4	1713.1		1714.17		1716.8	1717.6	1716.4						1715.4	1717.1	1714.1
383	U1541	C	6	H	2	100	101	44.61	46.704	This study	3.362		1717.1	1723.4	1714.8		1716.11		1718.2	1718.6	1717.4						1717.1	1718.4	1715.8
383	U1541	C	6	H	2	105	106	44.66	46.754	This study	3.24		1718.8	1725.4	1716.1		1718.06		1719.4	1720.2	1718.6						1718.4	1719.4	1717.1
383	U1541	C	6	H	2	110	111	44.71	46.804	This study	3.126		1720.8	1727.8	1718.1		1720		1720.9	1721.1	1720						1721.1	1721.8	1719.1
383	U1541	C	6	H	2	115	116	44.76	46.854	This study	3.511		1723.4	1729.4	1720.1		1722.78		1722.9	1726.8	1721.5						1723.1	1724.8	1722.1
383	U1541	C	6	H	2	120	121	44.81	46.904	This study	3.559		1726.1	1731.1	1722.1		1725.56		1725.5	1730.4	1723.7						1725.1	1727.4	1723.8
383	U1541	C	6	H	2	125	126	44.86	46.954	This study	3.494		1729.1	1733.4	1724.1		1728.33		1728.2	1733.1	1725.3						1727.1	1729.4	1725.4
383	U1541	C	6	H	2	130	131	44.91	47.004	This study	3.347		1732.1	1736.1	1726.4		1731.11		1731	1735.5	1727.4						1728.8	1731.1	1727.1
383	U1541	C	6	H	2	135	136	44.96	47.054	This study	3.317		1734.4	1738.8	1728.4		1733.89		1734.3	1737.6	1730						1730.1	1732.8	1728.8
383	U1541	C	6	H	2	140	141	45.01	47.104	This study	3.365		1736.8	1742.5	1730.8		1736.67		1736.5	1739.6	1733.9						1731.4	1735.1	1730.1
383	U1541	C	6	H	2	145	146	45.06	47.154	This study	3.277		1739.1	1746.1	1733.8		1739.44		1738.4	1741.2	1736.5						1732.8	1737.1	1731.4
383	U1541	C	6	H	2	150	151	45.11	47.204	This study	3.521		1742.5	1751.5	1736.4		1742.22		1741	1742.6	1739.2						1734.4	1746.1	1732.8
383	U1541	C	6	H	3	4	5	45.16	47.254	This study	3.263		1745.8	1754.5	1739.1		1745		1743.7	1743.7	1741.4						1736.1	1751.8	1734.8
383	U1541	C	6	H	3	9	10	45.21	47.304	This study	3.534		1748.8	1756.1	1741.8		1747.78		1751.4	1751.6	1743.7						1738.1	1753.5	1736.8
383	U1541	C	6	H	3	14	15	45.26	47.354	This study	3.419		1752.1	1758.1	1745.5		1750.56		1754.1	1755.9	1751.4						1746.5	1755.1	1743.8
383	U1541	C	6	H	3	19	20	45.31	47.404	This study	3.411		1754.8	1760.5	1748.8		1753.33		1756.1	1758.5	1753.9						1751.1	1756.5	1746.1
383	U1541	C	6	H	3	24	25	45.36	47.454	This study	3.386		1757.5	1762.5	1751.8		1756.11		1758.5	1761.8	1755.9						1753.5	1765.8	1750.8
383	U1541	C	6	H	3	29	30	45.41	47.504	This study	3.298		1760.1	1764.8	1755.1		1758.89		1760.8	1764.3	1758.9						1756.1	1769.5	1753.1
383	U1541	C	6	H	3	34	35	45.46	47.554	This study	3.339		1762.2	1767.5	1757.5		1761.67		1762.8	1766.9	1760.6						1757.5	1771.8	1756.1
383	U1541	C	6	H	3	39	40	45.51	47.604	This study	3.247		1764.8	1769.8	1759.8		1764.44		1765.1	1769.3	1762.4						1766.5	1774.2	1758.5
383	U1541	C	6	H	3	44	45	45.56	47.654	This study	3.155		1766.8	1771.8	1762.2		1767.22		1767.5	1771.8	1764.3						1770.5	1775.8	1765.8
383	U1541	C	6	H	3	49	50	45.61	47.704	This study	3.253		1769.2	1774.2	1764.5		1770		1770	1774.4	1766.7						1773.8	1777.5	1770.2
383	U1541	C	6	H	3	54	55	45.66	47.754	This study	3.153		1771.2	1776.5	1767.5		1772.78		1772.6	1776.1	1769.5						1777.2	1779.2	1773.2
383	U1541	C	6	H	3	59	60	45.71	47.804	This study	3.15		1773.2	1779.2	1769.5		1775.56		1775.7	1778.7	1772.4						1779.2	1780.8	1776.2
383	U1541	C	6	H	3	64	65	45.76	47.854	This study	3.41		1775.5	1781.2	1772.2		1778.33		1779.7	1782.2	1777.3						1781.5	1782.5	1780.5
383	U1541	C	6	H	3	69	70	45.81	47.904	This study	3.477		1777.8	1783.5	1774.2		1781.11		1782.4	1784.4	1780.1						1782.8	1784.2	1781.5
383	U1541	C	6	H	3	74	75	45.86	47.954	This study	3.395		1780.5	1785.5	1776.5		1783.89		1784.8	1786.1	1781.6						1784.2	1785.5	1782.8
383	U1541	C	6	H	3	79	80	45.91	48.004	This study	3.662		1783.5	1787.5	1779.2		1786.67		1786.5	1787.7	1783.2						1785.5	1786.9	1784.2
383	U1541	C	6	H	3	84	85	45.96	48.054	This study	3.533		1785.9	1789.5	1781.8		1789.44		1788.1	1789.1	1785.4						1786.9	1788.2	1785.5
383	U1541	C	6	H	3	89	90	46.01	48.104	This study	3.574		1788.9	1791.5	1784.9		1792.22		1789.5	1790.7	1787.3						1788.2	1789.9	1787.2
383	U1541	C	6	H	3	94	95	46.06	48.154	This study	3.863		1791.9	1795.5	1787.9		1795		1791.1	1792.4	1789.1						1790.5	1795.2	1788.9
383	U1541	C	6	H	3	99	100	46.11	48.204	This study	3.702		1794.5	1797.9	1790.2		1796.41		1792.4	1794.2	1790.5						1794.9	1797.9	1790.2
383	U1541	C	6	H	3	104	105	46.16	48.254	This study	3.704		1797.5	1800.2	1793.2		1797.81		1794	1796.6	1792.2						1796.9	1803.2	1794.5
383	U1541	C	6	H	3	109	110	46.21	48.304	This study	3.812		1800.2	1802.2	1796.5		1799.22		1796	1798.7	1794.2						1798.5	1805.9	1797.5
383	U1541	C	6	H	3	114	115	46.26	48.354	This study	3.513		1802.9	1805.9	1800.9		1800.62		1801.7	1803.2	1796.9						1800.9	1807.6	1799.5
383	U1541	C	6	H	3	119	120	46.31	48.404	This study	3.35		1805.5	1809.9	1803.9		1802.03		1804.2	1805.4	1801.5						1803.9	1809.2	1801.2
383	U1541	C	6	H	3	124	125	46.36	48.454	This study	3.344		1807.9	1812.9	1805.2		1803.44		1805.8	1807	1804.2						1807.9	1810.9	1802.9
383	U1541	C	6	H	3	129	130	46.41	48.504	This study	3.335		1810.6	1816.2	1807.2		1804.84		1807.2	1808.1	1805.8						1810.6	1812.9	1807.2
383	U1541	C	6	H	3	134	135	46.46	48.554	This study	3.17		1813.2	1819.2	1808.9		1806.25		1808.5	1809.3	1807.4						1812.2	1814.2	1810.6
383	U1541	C	6	H	3	139	140	46.51	48.604	This study	2.96		1816.2	1821.9	1810.6		1807.66		1809.5	1810.3	1808.9						1814.2	1815.9	1812.6
383	U1541	C	6	H	3	144	145	46.56	48.654	This study	3.088		1819.2	1824.6	1812.9		1809.06		1810.7	1811.1	1809.7						1815.9	1817.9	1814.2
383	U1541	C	6	H	3	149	150	46.61	48.704	This study	3.292		1821.6	1826.6	1815.2		1810.47		1811.7	1812.5	1810.7						1817.9	1821.6	1815.9
383	U1541	C	6	H	4	4	5	46.66	48.754	This study	3.2775		1824.2	1829.2	1818.6		1811.87		1812.9	1813.8	1811.7						1821.6	1824.6	1817.9
383	U1541	C	6	H	4	9	10	46.71	48.804	This study	3.298		1826.2	1832.3	1820.9		1813.28		1813.8	1814.8	1812.9						1824.6	1827.6	1820.9
383	U1541	C	6	H	4	14	15	46.76	48.854	This study	3.155		1828.2	1835.3	1823.9		1814.69		1815	1815.6	1814						1827.9	1831.6	1824.2
383	U1541	C	6	H	4	19	20	46.81	48.904	This study	3.131		1830.9	1837.9	1826.6		1816.09		1816	1816.2	1815.2						1832.3	1834.9	1827.9
383	U1541	C	6	H	4	24	25	46.86	48.954	This study	3.636		1833.3	1840.3	1829.2		1817.5		1817.2	1818	1816.4						1836.6	1839.9	1833.9
383	U1541	C	6	H	4	29	30	46.91	49.004	This study	3.659		1836.3	1843.3	1831.6		1818.95		1818.4	1819.3	1817.6						1844.6	1846.6	1837.3
383	U1541	C	6	H	4	34	35	46.96	49.054	This study	3.618		1838.9	1844.9	1833.6		1820.4		1819.7	1820.7	1818.7						1847.3	1849.6	1840.3
383	U1541	C	6	H	4	39	40	47.01	49.104	This study	3.565		1841.9	1846.9	1835.9		1821.85		1821.1	1822.7	1820.1						1849.6	1853	1847.3
383	U1541	C	6	H	4	44	45	47.06	49.154	This study	3.496		1844.6	1849.6	1838.3		1823.31		1822.5	1825	1821.3						1852.6	1855.3	1849.6
383	U1541	C	6	H	4	49	50	47.11	49.204	This study	3.34		1846.9	1851.9	1840.6		1824.76		1824	1827.2	1822.9						1855	1858	1851.3
383	U1541	C	6	H	4	54	55	47.16	49.254	This study	3.386		1849.3	1854.3	1843.3		1826.21		1825.4	1831.5	1824.2						1857.6	1865.6	1853
383	U1541	C	6	H	4	59	60	47.21	49.304	This study	3.273		1851.3	1856.6	1845.9		1827.66		1827	1833.9	1825.8						1865.6	1867.3	1855
383	U1541	C	6	H	4	64	65	47.26	49.354	This study	3.338		1853.3	1859.3	1847.9		1829.11		1828.4	1836.2	1827.2						1866.6	1869.3	1856
383	U1541	C	6	H	4	69	70	47.31	49.404	This study	3.26433		1855.6	1861.6	1850.3		1830.56		1830.1	1838.8	1829						1868.6	1871.3	1857.3
383	U1541	C	6	H	4	74	75	47.36	49.454	This study	3.2805		1858	1865	1852.3		1832.02		1831.7	1840.3	1830.5						1870	1874	1858.6
383	U1541	C	6	H	4	79	80	47.41	49.504	This study	3.445		1860.6	1868	1855		1833.47		1833.3	1841.9	1832.1						1871.3	1876	1861
383	U1541	C	6	H	4	84	85	47.46	49.554	This study	3.613		1864	1871.3	1857.3		1834.92		1835	1843.3	1833.9						1873.3	1877.7	1865.3
383	U1541	C	6	H	4	89	90	47.51	49.604	This study	3.388		1867	1874	1859.3		1836.37		1836.6	1844.7	1834.8						1875.3	1879.3	1868.6
383	U1541	C	6	H	4	94	95	47.56	49.654	This study	3.363		1870.3	1877	1861.3		1837.82		1839.2	1845.8	1836.2						1877.3	1881	1873
383	U1541	C	6	H	4	99	100	47.61	49.704	This study	3.404		1873.3	1879	1864.6		1839.27		1841.9	1847.2	1837.8						1878.7	1882.7	1875.3
383	U1541	C	6	H	4	104	105	47.66	49.754	This study	3.3655		1876.7	1881	1867.6		1840.73		1844.5	1848.4	1839.2						1880.7	1884.3	1877.7
383	U1541	C	6	H	4	109	110	47.71	49.804	This study	3.3855		1879.3	1882.7	1871		1842.18		1846.8	1849.8	1840.9						1882.7	1886.3	1879.3
383	U1541	C	6	H	4	114	115	47.76	49.854	This study	3.312		1881.3	1884.3	1874		1843.63		1848.8	1850.8	1842.7						1884.7	1887.7	1881
383	U1541	C	6	H	4	119	120	47.81	49.904	This study	3.3115		1883.3	1886	1877		1845.08		1850.2	1852.1	1844.9						1886.7	1889.3	1883.3
383	U1541	C	6	H	4	124	125	47.86	49.954	This study	3.327		1884.7	1887.7	1880		1846.53		1851.5	1853.3	1847						1888.3	1891	1885
383	U1541	C	6	H	4	129	130	47.91	50.004	This study	3.285		1886.7	1889.3	1882.7		1847.98		1852.9	1854.5	1849.4						1890.7	1892.7	1887
383	U1541	C	6	H	4	134	135	47.96	50.054	This study	3.209		1888.7	1891	1884.3		1849.44		1854.3	1855.7	1851.7						1892.7	1894.3	1889.3
383	U1541	C	6	H	4	139	140	48.01	50.104	This study	3.22		1890.3	1892.3	1886.3		1850.89		1855.7	1856.8	1853.5						1894.3	1896	1891.7
383	U1541	C	6	H	4	144	145	48.06	50.154	This study	3.393		1892.3	1894	1889		1852.34		1856.8	1858	1854.9						1896	1897.7	1894.7
383	U1541	C	6	H	4	149	150	48.11	50.204	This study	3.555		1894	1895	1891		1853.79		1858	1859	1856.4						1897.7	1899.4	1896.3
383	U1541	C	6	H	5	4	5	48.16	50.254	This study	3.485		1895.3	1896.3	1893		1855.24		1859.2	1860	1857.8						1899.4	1901	1898
383	U1541	C	6	H	5	9	10	48.21	50.304	This study	3.764		1896.7	1897.7	1895		1856.69		1860	1860.6	1859						1901	1902.4	1899.7
383	U1541	C	6	H	5	14	15	48.26	50.354	This study	3.544		1898	1898.7	1896.3		1858.15		1861	1861.2	1860.2						1902.4	1903.7	1901
383	U1541	C	6	H	5	19	20	48.31	50.404	This study	3.8215		1899.4	1900.4	1898		1859.6		1862.1	1862.9	1861.4						1904	1905.4	1902.7
383	U1541	C	6	H	5	24	25	48.36	50.454	This study	3.853		1900.7	1902	1899.7		1861.05		1863.3	1864.3	1862.5						1905.7	1907.4	1904.4
383	U1541	C	6	H	5	29	30	48.41	50.504	This study	3.8765		1902	1903.4	1900.7		1862.5		1864.7	1865.5	1863.7						1907	1909	1906
383	U1541	C	6	H	5	34	35	48.46	50.554	This study	3.838		1903.7	1905	1902		1865.01		1865.9	1866.5	1864.9						1908.7	1910.7	1907.7
383	U1541	C	6	H	5	39	40	48.51	50.604	This study	3.658		1905	1906.4	1903.4		1867.52		1867.2	1868.4	1866.3						1910.4	1912	1909
383	U1541	C	6	H	5	44	45	48.56	50.654	This study	3.707		1906.4	1908	1904.7		1870.03		1868.6	1870.6	1867.6						1911.7	1913.4	1910.4
383	U1541	C	6	H	5	54	55	48.66	50.754	This study	3.648		1908.7	1910.4	1907		1875.04		1871.4	1875.5	1869.8						1913.4	1915.4	1912
383	U1541	C	6	H	5	59	60	48.71	50.804	This study	3.499		1910	1912	1909		1877.55		1873.1	1878.8	1871.4						1914.7	1917	1913.4
383	U1541	C	6	H	5	64	65	48.76	50.854	This study	3.472		1911	1913.4	1910		1880.06		1875.1	1882.2	1872.6						1916	1918	1914.4
383	U1541	B	6	H	3	93	94	49.04	50.901	This study	3.515		1912.4	1914.7	1911		1882.42		1877.3	1885.3	1874.1						1917.4	1919.4	1915.4
383	U1541	B	6	H	3	98	99	49.09	50.951	This study	3.54		1913.7	1916	1912.4		1884.92		1879.8	1890	1875.5						1918.7	1921	1916.4
383	U1541	B	6	H	3	103	104	49.14	51.001	This study	3.461		1915	1917.4	1913.7		1887.43		1882.8	1894.9	1877.5						1920.7	1922.7	1917.7
383	U1541	B	6	H	3	108	109	49.19	51.051	This study	3.558		1916.4	1918.7	1915		1889.94		1885.7	1900.4	1879.6						1921.4	1923.7	1919
383	U1541	B	6	H	3	113	114	49.24	51.101	This study	3.505		1917.7	1920	1916		1892.45		1890.2	1903.4	1883.4						1922.7	1924.7	1920.7
383	U1541	B	6	H	3	118	119	49.29	51.151	This study	3.415		1919	1921.4	1917.4		1894.96		1894.9	1907.7	1888.7						1923.7	1926.1	1921.7
383	U1541	B	6	H	3	123	124	49.34	51.201	This study	3.445		1920.4	1922.4	1918.7		1897.47		1898.3	1910.1	1893.4						1925.1	1927.1	1923.1
383	U1541	B	6	H	3	128	129	49.39	51.251	This study	3.505		1921.7	1923.7	1919.7		1899.97		1903.2	1912.2	1896.5						1926.4	1928.1	1924.4
383	U1541	B	6	H	3	133	134	49.44	51.301	This study	3.426		1922.7	1924.7	1921		1902.48		1909.1	1914.2	1901.6						1927.7	1929.4	1925.4
383	U1541	B	6	H	3	138	139	49.49	51.351	This study	3.517		1924.1	1926.1	1922.4		1904.99		1912	1916.1	1906.5						1928.7	1930.4	1927.1
383	U1541	B	6	H	3	143	144	49.54	51.401	This study	3.317		1925.4	1927.1	1923.7		1907.5		1915.4	1918.9	1910.5						1930.1	1931.7	1928.7
383	U1541	B	6	H	3	148	149	49.59	51.451	This study	3.331		1926.7	1928.1	1924.7		1910.38		1918.3	1921.6	1914.6						1931.1	1932.7	1929.4
383	U1541	B	6	H	4	0	1	49.61	51.471	This study	3.331		1927.4	1928.7	1925.4		1911.54		1919.7	1922.8	1915.8						1931.7	1933.4	1930.1
383	U1541	B	6	H	4	5	6	49.66	51.521	This study	3.22		1928.4	1930.4	1926.7		1914.42		1922.2	1924.4	1918.1						1933.1	1934.7	1931.1
383	U1541	B	6	H	4	10	11	49.71	51.571	This study	3.217		1929.7	1931.4	1928.1		1917.31		1924.2	1926.2	1921.3						1934.1	1936.1	1932.4
383	U1541	B	6	H	4	15	16	49.76	51.621	This study	3.164		1930.7	1932.7	1929.4		1920.19		1925.8	1927.5	1922.6						1935.4	1937.1	1933.4
383	U1541	B	6	H	4	20	21	49.81	51.671	This study	3.262		1932.1	1934.1	1930.4		1923.08		1927.1	1928.9	1924						1936.4	1938.1	1934.4
383	U1541	B	6	H	4	25	26	49.86	51.721	This study	3.265		1933.1	1935.4	1931.7		1925.96		1928.7	1930.3	1925.6						1937.7	1939.4	1935.4
383	U1541	B	6	H	4	30	31	49.91	51.771	This study	3.364		1934.4	1936.7	1933.1		1928.85		1930.1	1931.7	1926.6						1938.7	1940.7	1936.7
383	U1541	B	6	H	4	35	36	49.96	51.821	This study	3.061		1935.7	1938.1	1934.1		1931.73		1931.5	1933.2	1927.9						1939.4	1941.7	1937.7
383	U1541	B	6	H	4	40	41	50.01	51.871	This study	3.139		1937.1	1939.1	1935.7		1934.62		1932.8	1934.6	1929.3						1941.1	1942.7	1939.1
383	U1541	B	6	H	4	45	46	50.06	51.921	This study	3.163		1938.1	1940.4	1936.7		1937.5		1934.2	1936.4	1930.7						1942.1	1943.4	1940.7
383	U1541	B	6	H	4	50	51	50.11	51.971	This study	3.063		1939.7	1941.7	1938.4		1939.83		1935.6	1938.7	1931.9						1943.1	1944.4	1941.7
383	U1541	B	6	H	4	55	56	50.16	52.021	This study	3.073		1941.1	1945.1	1940.1		1942.16		1937	1940.9	1933.2						1944.1	1945.4	1942.7
383	U1541	B	6	H	4	60	61	50.21	52.071	This study	3.699		1942.7	1947.4	1941.4		1944.48		1938.3	1943.4	1936.6						1945.4	1946.8	1944.1
383	U1541	B	6	H	4	65	66	50.26	52.121	This study	3.103		1944.8	1950.4	1943.1		1946.81		1940.5	1946	1938.9						1946.4	1947.8	1945.4
383	U1541	B	6	H	4	70	71	50.31	52.171	This study	3.687		1947.4	1952.8	1944.8		1949.14		1943.4	1951.3	1941.3						1948.1	1950.4	1946.8
383	U1541	B	6	H	4	75	76	50.36	52.221	This study	3.699		1950.1	1955.8	1947.1		1951.47		1949.3	1953.9	1943.1						1950.8	1954.1	1948.4
383	U1541	B	6	H	4	80	81	50.41	52.271	This study	3.605		1953.1	1958.4	1949.1		1953.79		1953.1	1957.8	1945.4						1954.1	1956.4	1952.8
383	U1541	B	6	H	4	85	86	50.46	52.321	This study	3.633		1955.1	1960.4	1950.8		1956.12		1955.8	1961.3	1951.7						1955.8	1958.4	1953.8
383	U1541	B	6	H	4	90	91	50.51	52.371	This study	3.538		1957.8	1962.8	1952.8		1958.45		1959.2	1963.1	1954.6						1957.4	1960.1	1955.1
383	U1541	B	6	H	4	95	96	50.56	52.421	This study	3.5335		1960.1	1964.8	1954.8		1960.78		1962.3	1964.8	1957.6						1959.1	1961.8	1956.8
383	U1541	B	6	H	4	100	101	50.61	52.471	This study	3.433		1962.4	1966.1	1956.4		1963.1		1965	1966.4	1960.7						1960.4	1963.1	1958.4
383	U1541	B	6	H	4	105	106	50.66	52.521	This study	3.36		1964.4	1968.1	1958.8		1965.43		1967.2	1968.2	1964.1						1962.4	1964.8	1959.8
383	U1541	B	6	H	4	110	111	50.71	52.571	This study	3.436		1966.4	1969.8	1960.4		1967.76		1968.8	1969.8	1966.8						1963.8	1966.1	1961.1
383	U1541	B	6	H	4	115	116	50.76	52.621	This study	3.419		1968.8	1971.1	1963.8		1970.09		1970.3	1971.1	1969.2						1965.1	1967.5	1963.1
383	U1541	B	6	H	4	120	121	50.81	52.671	This study	3.203		1971.1	1973.5	1966.4		1972.41		1971.5	1972.5	1971.3						1966.8	1968.8	1964.8
383	U1541	B	6	H	4	125	126	50.86	52.721	This study	3.285		1972.8	1975.1	1968.5		1974.74		1972.9	1973.9	1971.9						1968.1	1969.8	1966.1
383	U1541	B	6	H	4	130	131	50.91	52.771	This study	3.081		1974.5	1977.5	1970.5		1977.07		1973.9	1975.1	1973.3						1969.8	1971.1	1967.8
383	U1541	B	6	H	4	135	136	50.96	52.821	This study	3.332		1976.1	1979.1	1972.1		1979.4		1975.5	1976.2	1974.7						1970.5	1972.5	1969.1
383	U1541	B	6	H	4	140	141	51.01	52.871	This study	3.044		1978.1	1980.8	1974.1		1981.72		1976.8	1979.2	1976.4						1971.8	1973.5	1970.8
383	U1541	B	6	H	4	142	143	51.06	52.921	This study	3.112		1980.1	1983.1	1976.1		1984.05		1978.4	1981.1	1977.4						1973.1	1974.8	1971.8
383	U1541	B	6	H	5	0	1	51.11	52.971	This study	3.051		1981.8	1984.5	1977.8		1986.38		1979.8	1982.5	1979						1974.5	1975.8	1972.8
383	U1541	B	6	H	5	5	6	51.16	53.021	This study	3.069		1983.8	1986.5	1979.8		1988.71		1981.3	1984.1	1980.2						1975.8	1977.1	1974.1
383	U1541	B	6	H	5	10	11	51.21	53.071	This study	3.137		1985.5	1988.1	1981.8		1991.03		1982.9	1985.5	1981.5						1976.8	1978.1	1975.5
383	U1541	B	6	H	5	15	16	51.26	53.121	This study	3.071		1987.5	1989.8	1984.1		1993.36		1985.1	1987.2	1983.1						1978.1	1979.5	1976.8
383	U1541	B	6	H	5	20	21	51.31	53.171	This study	3.132		1989.8	1991.2	1986.5		1995.69		1987.6	1990.2	1985.1						1979.5	1980.8	1978.1
383	U1541	B	6	H	5	25	26	51.36	53.221	This study	3.318		1992.2	1993.5	1988.5		1998.02		1991	1993.9	1988						1980.8	1982.1	1979.5
383	U1541	B	6	H	5	30	31	51.41	53.271	This study	3.219		1994.8	1996.2	1991.5		2000.34		1994.3	1996.1	1989.9						1982.5	1984.1	1981.1
383	U1541	B	6	H	5	35	36	51.46	53.321	This study	3.568		1997.2	2000.2	1994.5		2002.67		1997.4	1999.4	1993.2						1984.8	1986.5	1982.8
383	U1541	B	6	H	5	40	41	51.51	53.371	This study	3.753		2000.2	2004.2	1996.8		2005		2000.2	2003.1	1998.9						1990.8	1993.8	1985.5
383	U1541	B	6	H	5	45	46	51.56	53.421	This study	3.588		2003.2	2007.2	1998.5		2006.67		2002.9	2005.7	2000.7						1995.2	1998.8	1989.8
383	U1541	B	6	H	5	50	51	51.61	53.471	This study	3.689		2005.5	2009.5	2000.5		2008.33		2005.5	2008.6	2002.9						1997.8	2001.2	1992.2
383	U1541	B	6	H	5	55	56	51.66	53.521	This study	3.6005		2008.5	2011.8	2003.8		2010		2008.6	2014.1	2005.1						2000.8	2003.5	1995.5
383	U1541	B	6	H	5	60	61	51.71	53.571	This study	3.528		2011.5	2014.2	2006.8		2011.67		2013.9	2015.9	2007.1						2003.8	2006.2	2000.2
383	U1541	B	6	H	5	65	66	51.76	53.621	This study	3.369		2013.9	2016.2	2008.8		2013.33		2016.5	2017.6	2009						2006.5	2008.5	2004.5
383	U1541	B	6	H	5	70	71	51.81	53.671	This study	3.257		2015.9	2018.5	2010.5		2015		2018.1	2019.2	2010.8						2009.8	2011.2	2008.2
383	U1541	B	6	H	5	75	76	51.86	53.721	This study	3.497		2017.5	2020.2	2012.5		2016.67		2019.6	2020.7	2013.2						2012.8	2014.9	2010.8
383	U1541	B	6	H	5	80	81	51.91	53.771	This study	3.108		2019.5	2021.9	2014.5		2018.33		2021.4	2022.3	2016.5						2016.2	2018.2	2015.5
383	U1541	B	6	H	5	85	86	51.96	53.821	This study	3.244		2021.2	2023.5	2017.5		2020		2022.7	2023.6	2019.4						2018.5	2020.2	2017.2
383	U1541	B	6	H	5	90	91	52.01	53.871	This study	3.104		2022.5	2024.9	2020.2		2021.67		2023.8	2024.7	2021.8						2020.5	2021.9	2018.9
383	U1541	B	6	H	5	95	96	52.06	53.921	This study	3.045		2024.2	2026.9	2022.2		2023.33		2024.9	2025.6	2023.8						2022.2	2023.5	2020.9
383	U1541	B	6	H	5	100	101	52.11	53.971	This study	2.867		2025.9	2028.2	2023.9		2025		2026	2026.2	2025.1						2023.9	2024.9	2022.5
383	U1541	B	6	H	5	105	106	52.16	54.021	This study	3.221		2027.5	2029.5	2025.5		2027.86		2027.8	2028.4	2026.7						2025.5	2026.9	2024.5
383	U1541	B	6	H	5	110	111	52.21	54.071	This study	3.173		2029.2	2031.2	2027.2		2030.71		2029.3	2030.2	2028						2027.2	2028.5	2025.5
383	U1541	B	6	H	5	115	116	52.26	54.121	This study	3.136		2030.5	2032.9	2028.9		2033.57		2030.9	2032.2	2029.5						2028.5	2029.9	2026.9
383	U1541	B	6	H	5	120	121	52.31	54.171	This study	3.117		2032.2	2034.9	2030.2		2036.43		2032.6	2033.7	2031.1						2030.5	2031.9	2028.5
383	U1541	B	6	H	5	125	126	52.36	54.221	This study	3.257		2033.9	2036.2	2031.9		2039.29		2034.2	2036.1	2032.6						2031.9	2033.2	2030.2
383	U1541	B	6	H	5	130	131	52.41	54.271	This study	3.4375		2035.5	2038.2	2033.5		2042.14		2036.1	2041.2	2034.4						2033.5	2035.2	2032.2
383	U1541	B	6	H	5	135	136	52.46	54.321	This study	3.633		2037.2	2040.6	2034.9		2045		2037.7	2044.3	2036.4						2035.5	2037.2	2033.9
383	U1541	B	6	H	5	140	141	52.51	54.371	This study	3.6135		2038.9	2042.2	2036.6		2046.13		2039	2046.1	2037.5						2037.2	2038.9	2035.2
383	U1541	B	6	H	5	145	146	52.56	54.421	This study	3.609		2040.6	2043.9	2037.9		2047.27		2040.6	2047.4	2038.6						2038.9	2040.9	2037.2
383	U1541	B	6	H	6	0	1	52.62	54.481	This study	3.525		2042.6	2045.9	2039.6		2048.63		2042.1	2049.1	2039.9						2041.2	2042.9	2039.2
383	U1541	B	6	H	6	5	6	52.67	54.531	This study	3.438		2044.2	2047.2	2040.9		2049.76		2043.6	2050.2	2041.2						2042.9	2044.6	2041.2
383	U1541	B	6	H	6	15	16	52.77	54.631	This study	3.267		2047.2	2049.6	2043.2		2052.03		2047.4	2052	2043.2						2047.2	2048.9	2044.2
383	U1541	B	6	H	6	20	21	52.82	54.681	This study	3.499		2048.6	2050.9	2044.9		2053.17		2049.1	2053.3	2046.5						2048.9	2050.6	2045.9
383	U1541	B	6	H	6	25	26	52.87	54.731	This study	3.359		2050.2	2052.6	2046.9		2054.3		2050.9	2054.4	2048.9						2050.6	2052.2	2047.6
383	U1541	B	6	H	6	30	31	52.92	54.781	This study	3.32833		2051.6	2053.9	2048.6		2055.44		2052.2	2055.3	2050.2						2052.2	2053.9	2048.9
383	U1541	B	6	H	6	35	36	52.97	54.831	This study	3.23		2053.2	2055.6	2050.2		2056.57		2053.6	2056.2	2051.6						2053.6	2055.2	2050.6
383	U1541	C	7	H	1	110	111	52.7	54.883	This study	3.411		2054.9	2056.9	2052.2		2057.75		2055.3	2057.7	2053.1						2055.2	2056.9	2052.2
383	U1541	C	7	H	1	115	116	52.75	54.933	This study	3.419		2056.6	2058.6	2054.2		2058.89		2056.9	2058.8	2054.4						2056.9	2058.2	2054.2
383	U1541	C	7	H	1	120	121	52.8	54.983	This study	3.326		2057.9	2059.9	2055.6		2060.02		2058.4	2060.2	2055.8						2058.2	2059.3	2056.9
383	U1541	C	7	H	1	125	126	52.85	55.033	This study	3.461		2059.3	2061.6	2057.6		2061.16		2059.9	2061	2057.3						2059.6	2060.3	2058.9
383	U1541	C	7	H	1	130	131	52.9	55.083	This study	3.807		2060.6	2062.6	2058.9		2062.29		2061.7	2062.8	2058.6						2060.9	2061.6	2060.6
383	U1541	C	7	H	1	135	136	52.95	55.133	This study	3.8585		2061.9	2064.3	2060.3		2063.42		2063.2	2064.3	2059.9						2061.9	2062.6	2061.3
383	U1541	C	7	H	1	140	141	53	55.183	This study	3.841		2063.3	2065.6	2061.6		2064.56		2064.3	2065.7	2061.3						2062.9	2064.3	2062.3
383	U1541	C	7	H	1	145	146	53.05	55.233	This study	3.841		2064.6	2066.9	2062.9		2065.69		2065.2	2066.8	2062.4						2064.3	2065.3	2062.9
383	U1541	C	7	H	2	0	1	53.1	55.283	This study	3.73		2065.9	2068.3	2064.3		2066.83		2066.1	2067.9	2063.5						2065.3	2066.3	2064.3
383	U1541	C	7	H	2	5	6	53.15	55.333	This study	3.952		2067.3	2069.9	2065.6		2067.96		2067.4	2069	2064.8						2066.3	2067.6	2065.6
383	U1541	C	7	H	2	10	11	53.2	55.383	This study	3.931		2068.6	2071.3	2066.9		2069.1		2068.5	2070.3	2066.5						2067.6	2068.9	2066.6
383	U1541	C	7	H	2	15	16	53.25	55.433	This study	3.85		2070.3	2072.9	2068.3		2070.23		2069.9	2071.2	2068.3						2068.9	2069.9	2067.6
383	U1541	C	7	H	2	20	21	53.3	55.483	This study	3.93		2071.6	2074.3	2069.6		2071.37		2071	2072.9	2069.9						2069.9	2071.3	2068.9
383	U1541	C	7	H	2	25	26	53.35	55.533	This study	3.978		2072.9	2075.9	2070.9		2072.5		2072.7	2074.3	2071.6						2071.3	2072.6	2069.9
383	U1541	C	7	H	2	30	31	53.4	55.583	This study	3.952		2074.3	2077.3	2072.3		2073.7		2074.3	2075.6	2073.6						2072.6	2073.9	2071.3
383	U1541	C	7	H	2	35	36	53.45	55.633	This study	3.748		2075.6	2078.9	2073.9		2074.89		2075.8	2076.9	2074.7						2073.9	2074.9	2072.6
383	U1541	C	7	H	2	40	41	53.5	55.683	This study	3.963		2077.3	2080.6	2074.9		2076.09		2077.3	2078.2	2076.2						2074.9	2076.3	2073.9
383	U1541	C	7	H	2	45	46	53.55	55.733	This study	3.778		2078.6	2081.9	2076.3		2077.28		2078.9	2079.5	2077.8						2075.9	2077.3	2074.9
383	U1541	C	7	H	2	50	51	53.6	55.783	This study	3.815		2079.9	2083.6	2077.6		2078.48		2079.8	2080.6	2078.9						2076.9	2078.9	2075.9
383	U1541	C	7	H	2	55	56	53.65	55.833	This study	3.693		2081.3	2085	2078.9		2079.67		2080.9	2081.7	2080						2077.9	2079.9	2076.9
383	U1541	C	7	H	2	60	61	53.7	55.883	This study	3.727		2083	2086.3	2080.3		2080.87		2081.7	2082.6	2080.9						2078.9	2081.3	2077.9
383	U1541	C	7	H	2	65	66	53.75	55.933	This study	3.838		2084.3	2087.6	2081.9		2082.07		2082.6	2083.7	2081.7						2080.3	2082.6	2079.3
383	U1541	C	7	H	2	70	71	53.8	55.983	This study	3.835		2086	2088.6	2083.3		2083.26		2083.5	2084.8	2082.9						2081.3	2083.6	2080.3
383	U1541	C	7	H	2	75	76	53.85	56.033	This study	3.638		2087.3	2091	2084.6		2084.46		2084.8	2086.2	2084						2082.6	2084.6	2081.6
383	U1541	C	7	H	2	80	81	53.9	56.083	This study	3.726		2088.6	2095	2086.3		2085.65		2085.9	2087.5	2084.8						2083.6	2086	2083
383	U1541	C	7	H	2	85	86	53.95	56.133	This study	3.678		2090.6	2099.3	2087.6		2086.85		2087.3	2088.6	2085.7						2085	2087.3	2084
383	U1541	C	7	H	2	90	91	54	56.183	This study	3.576		2093.3	2103	2089		2088.04		2088.6	2090.1	2086.6						2086.3	2088.6	2085.6
383	U1541	C	7	H	2	95	96	54.05	56.233	This study	3.626		2096	2105.7	2090.3		2089.24		2089.7	2091.2	2087.7						2087.3	2089.3	2086.6
383	U1541	C	7	H	2	100	101	54.1	56.283	This study	3.516		2100.3	2109.3	2092		2090.43		2090.8	2093.4	2088.8						2089	2090.6	2088.6
383	U1541	C	7	H	2	105	106	54.15	56.333	This study	3.519		2104.3	2115.3	2093.6		2091.63		2092.1	2099.8	2089.9						2090.6	2092.3	2089.3
383	U1541	C	7	H	2	110	111	54.2	56.383	This study	3.406		2107.3	2118.7	2095		2092.83		2093.6	2102.7	2091						2092	2093.3	2090.6
383	U1541	C	7	H	2	115	116	54.25	56.433	This study	3.493		2111	2122.3	2097.3		2094.02		2095.6	2104.9	2092.1						2093.3	2094.6	2092
383	U1541	C	7	H	2	120	121	54.3	56.483	This study	3.424		2115.3	2125	2099.3		2095.22		2097.6	2106.9	2093						2094.6	2096	2093.3
383	U1541	C	7	H	2	125	126	54.35	56.533	This study	3.29		2119.7	2127.7	2101.3		2096.41		2099.8	2108.8	2094.3						2096	2097.3	2094.6
383	U1541	C	7	H	2	130	131	54.4	56.583	This study	3.312		2124.7	2131	2103.3		2097.61		2102.7	2110.2	2095.4						2097.3	2099	2096
383	U1541	C	7	H	2	135	136	54.45	56.633	This study	3.301		2127.7	2134.7	2106		2098.8		2106.4	2111.3	2096.7						2099	2101.6	2097.3
383	U1541	C	7	H	2	140	141	54.5	56.683	This study	3.169		2132	2139	2108.3		2100		2109.1	2112.8	2097.8						2101.3	2103.6	2099
383	U1541	C	7	H	2	145	146	54.55	56.733	This study	3.345		2135.7	2142	2110.3		2102.39		2110.8	2114.1	2099.2						2103	2105.3	2101.6
383	U1541	C	7	H	3	0	1	54.6	56.783	This study	3.245		2139.7	2145	2112.7		2104.77		2112.6	2115.5	2100.5						2104.6	2107	2103.3
383	U1541	C	7	H	3	5	6	54.65	56.833	This study	3.322		2143.4	2148.7	2115.3		2107.16		2114.4	2117.2	2102						2106	2108.7	2105
383	U1541	C	7	H	3	10	11	54.7	56.883	This study	3.456		2147.4	2156.4	2118		2109.55		2116.3	2118.8	2103.6						2107.3	2110.3	2106.7
383	U1541	C	7	H	3	15	16	54.75	56.933	This study	3.586		2154.4	2162.7	2121.7		2111.93		2118.1	2120.5	2104.9						2109	2111.7	2108
383	U1541	C	7	H	3	20	21	54.8	56.983	This study	3.36		2158.1	2166.1	2124		2114.32		2119.9	2122.1	2106.2						2110.3	2113.3	2109.3
383	U1541	C	7	H	3	25	26	54.85	57.033	This study	3.389		2165.4	2172.4	2127		2116.7		2121.6	2123.8	2107.7						2112	2115	2110.7
383	U1541	C	7	H	3	30	31	54.9	57.083	This study	3.338		2171.4	2175.1	2130		2119.09		2123.4	2125.6	2109.1						2113.7	2116.7	2112
383	U1541	C	7	H	3	35	36	54.95	57.133	This study	3.328		2174.1	2177.1	2134.4		2121.48		2124.9	2127.1	2110.4						2115.3	2118.7	2113.3
383	U1541	C	7	H	3	40	41	55	57.183	This study	3.258		2176.4	2179.1	2139.4		2123.86		2126.7	2128.7	2111.7						2117	2120.3	2115
383	U1541	C	7	H	3	45	46	55.05	57.233	This study	3.282		2178.8	2181.1	2142.7		2126.25		2128.2	2130.7	2113.3						2118.7	2122.3	2116.7
383	U1541	C	7	H	3	50	51	55.1	57.283	This study	3.209		2180.4	2182.8	2147.4		2128.64		2130	2132.4	2114.4						2120.3	2124	2118
383	U1541	C	7	H	3	55	56	55.15	57.333	This study	3.241		2182.4	2184.8	2154.7		2131.02		2132	2134.2	2115.9						2122.3	2126.3	2119.7
383	U1541	C	7	H	3	60	61	55.2	57.383	This study	3.425		2183.8	2186.8	2158.7		2133.41		2134.2	2135.9	2119.4						2124.3	2130.7	2121.3
383	U1541	C	7	H	3	65	66	55.25	57.433	This study	3.266		2185.4	2188.4	2165.7		2135.8		2135.9	2137.3	2124						2126.3	2133	2123.3
383	U1541	C	7	H	3	70	71	55.3	57.483	This study	3.251		2187.1	2190.4	2174.4		2138.18		2137.5	2138.6	2126.7						2133.4	2135.4	2125.7
383	U1541	C	7	H	3	75	76	55.35	57.533	This study	3.134		2188.4	2191.8	2177.4		2140.57		2139.2	2140.6	2130						2135.7	2142	2132.7
383	U1541	C	7	H	3	80	81	55.4	57.583	This study	3.248		2190.1	2193.4	2180.4		2142.95		2141.5	2142.1	2133.5						2142	2143.7	2135
383	U1541	C	7	H	3	85	86	55.45	57.633	This study	3.295		2191.8	2194.8	2184.1		2145.34		2142.3	2143.7	2136.6						2143.7	2145	2141.7
383	U1541	C	7	H	3	90	91	55.5	57.683	This study	3.27		2193.8	2196.1	2187.4		2147.73		2143.7	2145.2	2141.5						2145.4	2146.4	2144
383	U1541	C	7	H	3	95	96	55.55	57.733	This study	3.475		2196.1	2199.1	2190.4		2150.11		2145.6	2146.1	2144.3						2147.4	2148.4	2146
383	U1541	C	7	H	3	100	101	55.6	57.783	This study	3.641		2198.1	2201.8	2193.4		2152.5		2152.9	2153.6	2151.6						2150.4	2156.4	2149
383	U1541	C	7	H	3	105	106	55.65	57.833	This study	3.571		2200.5	2204.1	2196.4		2155.68		2161.9	2163.3	2161.3						2159.7	2165.7	2157.7
383	U1541	C	7	H	3	110	111	55.7	57.883	This study	3.583		2202.8	2206.1	2198.5		2158.86		2167	2168.5	2164.1						2166.7	2171.1	2162.4
383	U1541	C	7	H	3	115	116	55.75	57.933	This study	3.58		2205.8	2208.5	2201.8		2162.05		2171.4	2173.4	2167						2172.4	2175.4	2168.7
383	U1541	C	7	H	3	120	121	55.8	57.983	This study	3.399		2208.8	2211.5	2204.8		2165.23		2174.5	2176	2171.6						2176.8	2179.8	2173.1
383	U1541	C	7	H	3	125	126	55.85	58.033	This study	3.229		2211.1	2214.8	2207.8		2168.41		2177.8	2180.7	2176						2179.4	2182.8	2177.4
383	U1541	C	7	H	3	130	131	55.9	58.083	This study	3.11017		2213.5	2218.1	2211.1		2171.59		2180.9	2183.5	2178.9						2183.1	2186.1	2180.4
383	U1541	C	7	H	3	135	136	55.95	58.133	This study	3.156		2216.1	2219.8	2212.5		2174.77		2184	2185.5	2180.7						2185.8	2188.4	2183.1
383	U1541	C	7	H	3	140	141	56	58.183	This study	3.051		2218.8	2221.8	2213.8		2177.95		2186.6	2187.5	2182.9						2189.4	2191.1	2186.4
383	U1541	C	7	H	3	145	146	56.05	58.233	This study	3.088		2220.8	2223.5	2215.5		2181.14		2188.6	2188.6	2187.9						2193.4	2194.4	2192.8
383	U1541	C	7	H	4	5	6	56.15	58.333	This study	3.0245		2223.8	2226.2	2218.8		2187.5		2206.7	2207.1	2206.4						2210.1	2211.1	2209.8
383	U1541	C	7	H	4	10	11	56.2	58.383	This study	3.078		2225.5	2227.8	2220.2		2192.86		2211.7	2213.7	2211.3						2212.5	2214.5	2211.1
383	U1541	C	7	H	4	15	16	56.25	58.433	This study	3.18		2226.8	2229.2	2221.8		2198.21		2214.4	2222.3	2211.9						2214.1	2216.5	2212.5
383	U1541	C	7	H	4	20	21	56.3	58.483	This study	3.199		2228.8	2230.8	2223.2		2203.57		2223	2226.5	2212.8						2216.1	2218.5	2214.1
383	U1541	C	7	H	4	25	26	56.35	58.533	This study	3.097		2230.2	2231.8	2224.5		2208.93		2226	2229.6	2213.7						2217.8	2220.2	2216.1
383	U1541	C	7	H	4	30	31	56.4	58.583	This study	3.402		2231.5	2233.5	2226.5		2214.29		2229.6	2231.8	2215.9						2220.8	2223.8	2218.5
383	U1541	C	7	H	4	35	36	56.45	58.633	This study	3.448		2233.2	2235.2	2228.2		2219.64		2231.6	2233.8	2218.8						2223.8	2228.2	2221.2
383	U1541	C	7	H	4	40	41	56.5	58.683	This study	3.156		2234.5	2236.2	2229.8		2225		2233.3	2234.9	2224.9						2227.5	2231.8	2225.2
383	U1541	C	7	H	4	45	46	56.55	58.733	This study	3.342		2235.8	2237.8	2231.8		2228		2235.3	2236.2	2231.1						2233.2	2234.5	2228.5
383	U1541	C	7	H	4	50	51	56.6	58.783	This study	3.629		2237.2	2239.2	2233.8		2231		2236.8	2237.7	2236.4						2235.5	2236.5	2234.5
383	U1541	C	7	H	4	55	56	56.65	58.833	This study	3.843		2238.8	2240.5	2235.8		2234		2238.8	2239	2237.7						2237.5	2238.5	2236.2
383	U1541	C	7	H	4	60	61	56.7	58.883	This study	3.779		2240.2	2241.8	2237.5		2237		2239.7	2239.9	2238.8						2238.8	2239.8	2237.8
383	U1541	C	7	H	4	65	66	56.75	58.933	This study	4.019		2241.5	2243.2	2238.8		2240		2240.4	2240.6	2239.5						2240.2	2240.8	2239.5
383	U1541	C	7	H	4	70	71	56.8	58.983	This study	3.962		2242.9	2244.5	2240.5		2241.54		2241.2	2241.2	2240.4						2241.2	2242.2	2240.5
383	U1541	C	7	H	4	75	76	56.85	59.033	This study	3.928		2244.2	2246.2	2242.2		2243.09		2242.6	2243.5	2241.2						2242.5	2243.2	2241.8
383	U1541	C	7	H	4	80	81	56.9	59.083	This study	3.551		2245.9	2247.5	2243.5		2244.63		2244.1	2245	2242.4						2243.9	2244.5	2243.5
383	U1541	C	7	H	4	85	86	56.95	59.133	This study	3.826		2247.2	2248.5	2245.2		2246.17		2245.4	2246.1	2243.5						2244.9	2245.9	2244.2
383	U1541	B	7	H	2	110	111	57.21	59.181	This study	3.666		2248.5	2250.2	2246.5		2247.65		2247.2	2248.1	2245						2246.2	2247.2	2245.2
383	U1541	B	7	H	2	115	116	57.26	59.231	This study	3.443		2250.2	2251.9	2248.5		2249.2		2248.7	2249.8	2246.5						2247.5	2248.2	2246.5
383	U1541	B	7	H	2	120	121	57.31	59.281	This study	3.536		2251.9	2253.5	2249.9		2250.74		2250.5	2251.2	2248.3						2248.9	2249.2	2247.5
383	U1541	B	7	H	2	125	126	57.36	59.331	This study	3.28		2253.5	2255.2	2251.5		2252.28		2252.3	2253.4	2250.1						2250.9	2251.9	2248.9
383	U1541	B	7	H	2	130	131	57.41	59.381	This study	3.268		2255.2	2256.9	2253.2		2253.83		2253.8	2255.3	2251.8						2252.5	2253.5	2250.5
383	U1541	B	7	H	2	135	136	57.46	59.431	This study	3.176		2256.9	2259.2	2254.9		2255.37		2255.8	2257.6	2254						2254.5	2258.9	2251.9
383	U1541	B	7	H	2	137	138	57.48	59.451	This study	3.12		2257.9	2260.2	2255.9		2255.99		2256.4	2258.2	2254.7						2255.2	2260.9	2252.9
383	U1541	B	7	H	2	142	143	57.53	59.501	This study	2.994		2259.9	2262.2	2257.2		2257.53		2258.4	2260.6	2256.7						2257.2	2262.9	2255.2
383	U1541	B	7	H	3	0	1	57.61	59.581	This study	2.957		2262.9	2265.2	2260.5		2260		2260.6	2263.5	2259.1						2261.2	2266.6	2258.2
383	U1541	B	7	H	3	5	6	57.66	59.631	This study	3.047		2264.5	2266.9	2262.2		2261.88		2262.4	2265.9	2260.6						2264.5	2268.6	2259.5
383	U1541	B	7	H	3	10	11	57.71	59.681	This study	3.084		2266.6	2268.6	2264.2		2263.75		2264.4	2267.9	2262.4						2267.9	2270.6	2261.2
383	U1541	B	7	H	3	15	16	57.76	59.731	This study	3.257		2268.9	2270.2	2266.9		2265.62		2267.2	2270.1	2264.6						2270.9	2273.2	2262.9
383	U1541	B	7	H	3	20	21	57.81	59.781	This study	3.321		2270.2	2271.6	2268.9		2267.5		2270.3	2271.9	2267						2272.9	2275.6	2264.2
383	U1541	B	7	H	3	25	26	57.86	59.831	This study	3.225		2272.2	2273.6	2270.2		2269.38		2272.3	2273.6	2269.9						2274.9	2277.6	2268.2
383	U1541	B	7	H	3	30	31	57.91	59.881	This study	3.62		2273.9	2275.6	2271.9		2271.25		2274.1	2275.4	2273.9						2276.6	2279.2	2272.6
383	U1541	B	7	H	3	45	46	58.06	60.031	This study	3.77		2278.2	2279.9	2275.9		2276.88		2276.1	2279.6	2275.6						2281.2	2282.9	2279.2
383	U1541	B	7	H	3	50	51	58.11	60.081	This study	3.654		2279.9	2281.6	2277.6		2278.75		2278	2281.1	2276.9						2282.9	2284.6	2280.9
383	U1541	B	7	H	3	55	56	58.16	60.131	This study	3.705		2281.6	2283.2	2279.6		2280.62		2280	2282.9	2278.7						2284.6	2286.2	2282.6
383	U1541	B	7	H	3	60	61	58.21	60.181	This study	3.655		2282.9	2284.6	2280.9		2282.5		2281.8	2284.2	2280.2						2286.2	2287.6	2284.2
383	U1541	B	7	H	3	65	66	58.26	60.231	This study	3.646		2284.6	2286.2	2282.9		2284.38		2283.8	2285.8	2282						2287.6	2289.3	2285.6
383	U1541	B	7	H	3	70	71	58.31	60.281	This study	3.606		2285.9	2287.6	2284.6		2286.25		2285.5	2287.3	2284						2289.3	2290.6	2287.2
383	U1541	B	7	H	3	75	76	58.36	60.331	This study	3.324		2287.9	2289.3	2286.6		2288.12		2287.5	2288.6	2286.4						2290.6	2292.3	2288.9
383	U1541	B	7	H	3	80	81	58.41	60.381	This study	3.603		2289.9	2290.9	2287.9		2290		2289.5	2290.8	2288						2291.3	2294.6	2290.3
383	U1541	B	7	H	3	85	86	58.46	60.431	This study	3.193		2291.9	2294.6	2289.6		2291.88		2292.1	2294.6	2291.3						2293.9	2297.3	2291.9
383	U1541	B	7	H	3	90	91	58.51	60.481	This study	3.219		2294.6	2298.3	2291.6		2293.75		2295	2298.3	2293.2						2296.3	2301.3	2293.9
383	U1541	B	7	H	3	100	101	58.61	60.581	This study	3.11		2300.6	2303.6	2295.3		2297.5		2301	2304.5	2297.2						2305.9	2311.6	2299.6
383	U1541	B	7	H	3	105	106	58.66	60.631	This study	3.273		2303.6	2307.3	2298.3		2299.38		2304.5	2306.9	2301.2						2309.6	2314.3	2305.9
383	U1541	B	7	H	3	110	111	58.71	60.681	This study	3.243		2305.9	2310.6	2302.3		2301.25		2307.8	2308.7	2305.1						2313.6	2317	2309.6
383	U1541	B	7	H	3	115	116	58.76	60.731	This study	3.892		2308.6	2313.3	2306.3		2303.12		2314.2	2315.5	2313.9						2317	2321.6	2315.6
383	U1541	B	7	H	3	120	121	58.81	60.781	This study	3.392		2311.3	2315.6	2308.3		2305		2316.2	2317.5	2315.3						2319.3	2324.3	2317
383	U1541	B	7	H	3	125	126	58.86	60.831	This study	3.443		2314.3	2318.6	2310.3		2306.88		2318.1	2319	2317						2322	2327	2318.6
383	U1541	B	7	H	3	130	131	58.91	60.881	This study	3.502		2316.6	2321.3	2312.3		2308.75		2319.7	2320.6	2318.8						2324.3	2329.6	2320.3
383	U1541	B	7	H	3	135	136	58.96	60.931	This study	3.453		2318.6	2323.6	2314		2310.62		2321.7	2322.5	2320.8						2326.3	2331.6	2322.3
383	U1541	B	7	H	3	140	141	59.01	60.981	This study	3.426		2321.3	2326.3	2316		2312.5		2323.4	2324.3	2322.5						2328.6	2333.6	2324.3
383	U1541	B	7	H	3	145	146	59.06	61.031	This study	3.365		2324.3	2329	2318.3		2314.38		2325.2	2325.8	2324.3						2331.3	2335.7	2326.6
383	U1541	B	7	H	4	0	1	59.11	61.081	This study	3.4525		2327	2331	2320.6		2316.25		2326.9	2328	2326.3						2333.3	2337.3	2329
383	U1541	B	7	H	4	5	6	59.16	61.131	This study	3.4305		2329.6	2332.6	2323.3		2318.12		2328.9	2329.8	2327.8						2336	2339.3	2332
383	U1541	B	7	H	4	10	11	59.21	61.181	This study	3.502		2331.6	2334	2326.3		2320		2330.7	2331.4	2329.4						2338.3	2340.7	2334.7
383	U1541	B	7	H	4	15	16	59.26	61.231	This study	3.3695		2334	2336	2329.6		2325		2332.7	2333.6	2331.1						2341	2342.7	2337.3
383	U1541	B	7	H	4	25	26	59.36	61.331	This study	3.08333		2338.3	2342	2336.3		2335		2336.6	2338	2334.7						2345.3	2347.3	2343
383	U1541	B	7	H	4	30	31	59.41	61.381	This study	2.98233		2341	2344.3	2338.3		2340		2338.8	2340.2	2336.6						2347.7	2350	2345
383	U1541	B	7	H	4	35	36	59.46	61.431	This study	2.988		2343	2346.3	2340		2342.5		2340.6	2342.4	2338.8						2349.3	2351.7	2347
383	U1541	B	7	H	4	45	46	59.56	61.531	This study	3.153		2347	2350	2343.3		2347.5		2344.1	2345.9	2342.1						2353	2354.7	2351.3
383	U1541	B	7	H	4	50	51	59.61	61.581	This study	3.116		2349	2351.7	2345.7		2350		2347	2348.5	2344.6						2354.7	2356	2353.3
383	U1541	B	7	H	4	55	56	59.66	61.631	This study	3.309		2351	2353.7	2348.3		2352.5		2350.3	2351.2	2348.8						2356.3	2357.3	2355
383	U1541	B	7	H	4	65	66	59.76	61.731	This study	3.74		2355	2358.7	2352		2357.5		2357.3	2360.9	2356						2359	2360	2358.7
383	U1541	B	7	H	4	70	71	59.81	61.781	This study	3.672		2357.3	2361.7	2354.3		2359.21		2360.9	2364.4	2359.1						2360.4	2361.4	2359.4
383	U1541	B	7	H	4	75	76	59.86	61.831	This study	3.619		2359.4	2363.7	2356		2360.93		2364.2	2366.2	2361.8						2361.4	2366	2360.7
383	U1541	B	7	H	4	80	81	59.91	61.881	This study	3.443		2361.7	2366	2358.4		2362.64		2366.8	2368.1	2366.4						2365	2368	2362.7
383	U1541	B	7	H	5	0	1	59.95	61.921	This study	3.541		2363.4	2367.4	2359.7		2364.01		2368.6	2369.5	2367						2367.4	2369.7	2364.7
383	U1541	B	7	H	5	5	6	60	61.971	This study	3.611		2365.7	2369.4	2362		2365.73		2369.9	2371	2368.6						2370	2371.7	2367.4
383	U1541	B	7	H	5	10	11	60.05	62.021	This study	3.528		2367.7	2371.4	2363.7		2367.44		2371.2	2372.5	2369.7						2371.7	2373.4	2369
383	U1541	B	7	H	5	15	16	60.1	62.071	This study	3.55		2369.7	2373.7	2366		2369.15		2373	2373.7	2371.2						2373.4	2375	2371
383	U1541	B	7	H	5	25	26	60.2	62.171	This study	3.256		2373.7	2378.4	2369.7		2372.58		2376.3	2377.8	2374.5						2376.7	2378.4	2374.7
383	U1541	B	7	H	5	30	31	60.25	62.221	This study	3.234		2375.7	2380.7	2372		2374.29		2378.1	2380	2376.1						2378.7	2380.4	2376.7
383	U1541	B	7	H	5	55	56	60.5	62.471	This study	3.279		2385.4	2389.7	2378.4		2382.86		2386.4	2387.5	2384.2						2390.4	2399.7	2387.4
383	U1541	B	7	H	5	60	61	60.55	62.521	This study	3.274		2387.1	2391.4	2380		2384.58		2388	2389.3	2386.4						2392.7	2401.1	2390.1
383	U1541	B	7	H	5	65	66	60.6	62.571	This study	3.396		2389.4	2393.7	2382.7		2386.29		2389.5	2390.8	2387.8						2399.7	2402.4	2392.4
383	U1541	B	7	H	5	70	71	60.65	62.621	This study	3.411		2391.1	2395.7	2385.4		2388		2391.1	2392.4	2389.3						2401.4	2403.4	2399.7
383	U1541	C	8	H	2	10	11	62.7	62.694	This study	3.524		2393.7	2398.1	2388.1		2390.5		2393	2394.1	2391.3						2403.4	2405.1	2401.4
383	U1541	C	8	H	2	15	16	62.75	62.744	This study	3.4		2395.4	2400.1	2390.1		2392.22		2394.8	2396.8	2392.6						2404.4	2406.1	2402.7
383	U1541	C	8	H	2	20	21	62.8	62.794	This study	3.429		2397.4	2401.7	2391.7		2393.93		2396.6	2399	2393.7						2405.8	2407.4	2404.1
383	U1541	C	8	H	2	35	36	62.95	62.944	This study	3.422		2401.4	2405.8	2396.1		2399.07		2401.4	2403.2	2399.2						2407.8	2409.4	2406.1
383	U1541	C	8	H	2	40	41	63	62.994	This study	3.429		2403.1	2407.4	2398.1		2400.79		2403	2404.5	2400.7						2409.1	2411.1	2407.4
383	U1541	C	8	H	2	45	46	63.05	63.044	This study	3.418		2404.8	2409.4	2399.7		2402.5		2404.7	2406	2402.5						2410.8	2413.4	2408.8
383	U1541	C	8	H	2	55	56	63.15	63.144	This study	3.295		2407.8	2413.8	2403.4		2408.5		2407.8	2411.1	2406.3						2418.8	2420.4	2410.8
383	U1541	C	8	H	2	60	61	63.2	63.194	This study	3.243		2409.4	2416.1	2404.8		2411.5		2410	2413.5	2407.1						2420.1	2421.8	2412.1
383	U1541	C	8	H	2	65	66	63.25	63.244	This study	3.322		2411.8	2418.4	2407.4		2414.5		2412.2	2415.7	2408.5						2421.8	2423.4	2413.8
383	U1541	C	8	H	2	70	71	63.3	63.294	This study	3.077		2414.1	2420.1	2409.8		2417.5		2414.4	2417.9	2410.4						2423.1	2424.8	2415.8
383	U1541	C	8	H	2	80	81	63.4	63.394	This study	3.078		2419.1	2423.4	2413.8		2423.5		2419.7	2421.2	2415.9						2425.4	2427.1	2421.8
383	U1541	C	8	H	2	90	91	63.5	63.494	This study	3.163		2423.4	2427.1	2419.1		2429.5		2425.4	2426.1	2420.8						2428.5	2429.5	2426.8
383	U1541	C	8	H	2	95	96	63.55	63.544	This study	3.914		2426.4	2429.1	2423.8		2432.5		2430.3	2432.3	2428.9						2430.1	2431.1	2429.8
383	U1541	C	8	H	2	100	101	63.6	63.594	This study	3.925		2428.5	2431.1	2425.8		2433.91		2432.5	2434	2431.4						2431.1	2432.5	2430.8
383	U1541	C	8	H	2	105	106	63.65	63.644	This study	3.857		2430.5	2433.1	2427.8		2435.32		2434	2435.8	2432.5						2432.5	2433.8	2431.5
383	U1541	C	8	H	2	110	111	63.7	63.694	This study	3.945		2431.8	2434.5	2429.1		2436.73		2435.6	2437.1	2434						2433.5	2434.8	2432.5
383	U1541	C	8	H	2	115	116	63.75	63.744	This study	3.895		2433.8	2436.5	2430.8		2438.14		2436.9	2438.4	2435.6						2434.5	2435.8	2433.5
383	U1541	C	8	H	2	120	121	63.8	63.794	This study	3.888		2435.5	2438.1	2432.5		2439.55		2438.2	2439.7	2437.1						2435.5	2437.1	2434.5
383	U1541	C	8	H	2	125	126	63.85	63.844	This study	3.832		2436.8	2439.5	2433.8		2440.96		2439.7	2441.1	2438.9						2436.8	2438.1	2435.5
383	U1541	C	8	H	2	130	131	63.9	63.894	This study	3.884		2438.5	2441.5	2435.5		2442.37		2441.3	2442.6	2440						2437.8	2439.1	2436.8
383	U1541	C	8	H	2	135	136	63.95	63.944	This study	3.894		2440.1	2443.1	2436.8		2443.78		2442.6	2443.7	2441.3						2439.1	2440.1	2437.8
383	U1541	C	8	H	2	140	141	64	63.994	This study	3.847		2441.8	2444.5	2438.1		2445.19		2443.9	2445.5	2442.6						2440.5	2441.5	2439.1
383	U1541	C	8	H	3	0	1	64.1	64.094	This study	3.606		2444.5	2447.1	2441.1		2448.01		2446.4	2447.2	2445						2442.8	2443.5	2441.5
383	U1541	C	8	H	3	5	6	64.15	64.144	This study	3.854		2446.1	2448.5	2442.8		2449.42		2447.7	2448.6	2446.6						2444.1	2445.1	2442.8
383	U1541	C	8	H	3	10	11	64.2	64.194	This study	3.351		2447.8	2450.2	2444.5		2450.83		2449	2449.9	2448.8						2445.8	2447.8	2444.8
383	U1541	C	8	H	3	15	16	64.25	64.244	This study	3.761		2449.1	2451.5	2445.8		2452.24		2449.9	2451.2	2449.4						2446.5	2449.8	2445.5
383	U1541	C	8	H	3	45	46	64.55	64.544	This study	3.404		2454.5	2457.8	2451.8		2460.71		2453.6	2455.4	2453						2451.5	2453.5	2449.5
383	U1541	C	8	H	3	55	56	64.65	64.644	This study	3.236		2457.5	2460.8	2454.8		2463.53		2455.6	2458.9	2454.7						2454.8	2456.5	2452.2
383	U1541	C	8	H	3	70	71	64.8	64.794	This study	3.166		2461.8	2465.8	2458.8		2467.76		2458	2464	2456.7						2460.8	2461.5	2455.2
383	U1541	C	8	H	3	75	76	64.85	64.844	This study	3.218		2463.2	2467.2	2460.5		2469.17		2459.3	2465.7	2458.2						2461.8	2462.8	2457.5
383	U1541	C	8	H	3	80	81	64.9	64.894	This study	3.312		2465.2	2469.5	2462.5		2470.58		2460.9	2467.1	2460						2463.2	2464.5	2461.5
383	U1541	C	8	H	3	85	86	64.95	64.944	This study	3.116		2466.8	2471.2	2464.5		2471.99		2462.9	2468.8	2461.6						2464.5	2465.8	2463.2
383	U1541	C	8	H	3	90	91	65	64.994	This study	3.087		2468.5	2472.5	2466.8		2473.4		2465.1	2470.4	2463.3						2466.2	2467.2	2464.8
383	U1541	C	8	H	3	100	101	65.1	65.094	This study	3.226		2473.5	2476.2	2470.5		2476.22		2469.9	2473.2	2466.8						2469.8	2471.2	2469.5
383	U1541	C	8	H	3	105	106	65.15	65.144	This study	3.079		2475.5	2478.2	2472.5		2477.63		2472.3	2475.2	2469.3						2471.2	2474.2	2470.5
383	U1541	C	8	H	3	110	111	65.2	65.194	This study	3.562		2477.9	2480.9	2474.2		2479.04		2476.1	2478.5	2473.9						2473.9	2478.9	2472.2
383	U1541	C	8	H	3	135	136	65.45	65.444	This study	3.81		2487.2	2490.2	2481.9		2486.09		2483.1	2484.9	2481.4						2488.5	2490.9	2479.5
383	U1541	C	8	H	3	140	141	65.5	65.494	This study	3.845		2488.5	2491.5	2483.9		2487.5		2484.9	2486.7	2483.4						2490.9	2492.5	2480.9
383	U1541	C	8	H	4	5	6	65.65	65.644	This study	3.506		2494.2	2496.2	2490.2		2494		2489.8	2491.3	2489.1						2496.6	2498.9	2492.9
383	U1541	C	8	H	4	10	11	65.7	65.694	This study	3.362		2496.2	2499.2	2492.9		2496.17		2491.5	2492.6	2491.3						2499.2	2501.9	2496.6
383	U1541	C	8	H	4	15	16	65.75	65.744	This study	3.054		2497.9	2503.6	2495.2		2498.33		2493.3	2493.7	2492.2						2501.6	2503.9	2499.6
383	U1541	C	8	H	4	25	26	65.85	65.844	This study	3.581		2501.6	2509.2	2499.2		2502.67		2495.9	2496.1	2494.4						2505.9	2507.6	2504.6
383	U1541	C	8	H	4	35	36	65.95	65.944	This study	3.0755		2505.2	2512.2	2502.6		2507		2500.8	2503.6	2498.8						2508.9	2510.2	2508.6
383	U1541	C	8	H	4	40	41	66	65.994	This study	3.147		2507.6	2513.6	2504.9		2509.17		2506.3	2508.5	2501.6						2510.2	2511.2	2509.2
383	U1541	C	8	H	4	45	46	66.05	66.044	This study	3.473		2510.9	2516.2	2508.6		2511.33		2510.7	2513.3	2508.9						2511.9	2512.2	2511.2
383	U1541	C	8	H	4	50	51	66.1	66.094	This study	3.925		2515.6	2520.3	2512.6		2513.5		2517.1	2519.5	2514.6						2513.9	2517.6	2512.6
383	U1541	C	8	H	4	55	56	66.15	66.144	This study	3.821		2518.6	2523.3	2515.2		2515.67		2520.2	2522.1	2517.5						2516.2	2523.6	2514.6
383	U1541	C	8	H	4	60	61	66.2	66.194	This study	3.867		2522.6	2526.3	2517.9		2517.83		2522.8	2523.9	2519.9						2522.6	2526.3	2515.9
383	U1541	C	8	H	4	65	66	66.25	66.244	This study	3.9915		2525.6	2529.3	2520.9		2520		2524.8	2526.1	2522.1						2525.9	2528.6	2518.2
383	U1541	C	8	H	4	75	76	66.35	66.344	This study	3.87		2530.6	2534.9	2525.9		2524.95		2528.3	2530.5	2526.5						2530.3	2531.9	2526.3
383	U1541	C	8	H	4	84	85	66.45	66.444	This study	3.094		2534.9	2542.6	2530.3		2529.89		2534	2534.9	2533.8						2533.9	2534.9	2532.9
383	U1541	C	8	H	4	95	96	66.55	66.544	This study	3.805		2538.9	2547.3	2534.9		2534.84		2536	2540.4	2535.4						2535.9	2536.3	2534.9
383	U1541	C	8	H	4	105	106	66.65	66.644	This study	2.998		2542.3	2550.6	2539.3		2539.78		2543.9	2548.1	2541.3						2538.9	2540.3	2537.6
383	U1541	C	8	H	4	114	115	66.75	66.744	This study	3.07		2545.3	2553.6	2542.6		2544.73		2549.7	2552.1	2545						2544.3	2546	2542.6
383	U1541	C	8	H	4	120	121	66.8	66.794	This study	2.818		2547	2555.3	2544.3		2547.2		2552.3	2553.6	2546.8						2546	2547.3	2544.6
383	U1541	C	8	H	4	125	126	66.85	66.844	This study	3.279		2548.6	2557.3	2546		2549.67		2554.5	2555.8	2548.6						2548	2549	2546.6
383	U1541	C	8	H	4	130	131	66.9	66.894	This study	3.077		2551.3	2559	2547.6		2552.14		2556.5	2558.9	2550.6						2549.3	2551	2548
383	U1541	C	8	H	4	135	136	66.95	66.944	This study	2.975		2554	2561	2549.6		2554.62		2558.3	2560.9	2552.3						2551	2553.3	2549.6
383	U1541	C	8	H	4	140	141	67	66.994	This study	3.103		2556.6	2563	2552.3		2557.09		2560	2562.9	2555.4						2552.6	2556.3	2551
383	U1541	C	8	H	5	0	1	67.11	67.104	This study	3.24		2562	2566.7	2556.6		2562.53		2563.3	2566.6	2561.3						2557	2561.6	2554.6
383	U1541	C	8	H	5	5	6	67.16	67.154	This study	3.475		2564.7	2568.7	2559.6		2565		2565.1	2568.4	2563.8						2560.3	2564	2558.6
383	U1541	C	8	H	5	10	11	67.21	67.204	This study	3.244		2567.3	2571	2562.3		2568.5		2567.3	2570.4	2566.4						2563	2565.7	2561
383	U1541	C	8	H	5	15	16	67.26	67.254	This study	3.257		2570.3	2574.7	2565.7		2572		2569.7	2572.4	2568.2						2566	2568	2563.3
383	U1541	C	8	H	5	20	21	67.31	67.304	This study	3.215		2573.3	2578.3	2569		2575.5		2572.4	2574.1	2569.9						2568.7	2570.7	2566.7
383	U1541	C	8	H	5	25	26	67.36	67.354	This study	3.3765		2576	2581	2571.7		2579		2575.2	2576.1	2572.1						2571.3	2573	2569.7
383	U1541	C	8	H	5	30	31	67.41	67.404	This study	2.94		2580	2584.3	2575		2582.5		2579	2581.8	2576.3						2575	2578.7	2573.7
383	U1541	C	8	H	5	35	36	67.46	67.454	This study	2.929		2583.3	2588	2577.7		2586		2582.1	2585.1	2579.2						2578.3	2582.3	2576
383	U1541	C	8	H	5	40	41	67.51	67.504	This study	2.984		2586.7	2591	2581.7		2589.5		2585.1	2587.8	2582.3						2582	2585.3	2579
383	U1541	C	8	H	5	45	46	67.56	67.554	This study	3.065		2591	2593.7	2585.7		2593		2588	2591.1	2585.1						2586	2588.4	2582
383	U1541	C	8	H	5	50	51	67.61	67.604	This study	3.1		2593.7	2596.7	2589.7		2596.5		2591.5	2593.7	2588						2589	2590.4	2586
383	U1541	C	8	H	5	55	56	67.66	67.654	This study	3.5505		2598.4	2603	2594.7		2600		2597.5	2598.6	2596.4						2592.7	2598.7	2591
383	U1541	C	8	H	5	60	61	67.71	67.704	This study	3.585		2602	2606.7	2597.7		2603.21		2601.9	2605.2	2599.2						2597.7	2602.7	2593.4
383	U1541	C	8	H	5	65	66	67.76	67.754	This study	3.593		2606.4	2610	2601.7		2606.43		2605.4	2608.3	2602.8						2603	2606.4	2597.4
383	U1541	C	8	H	5	75	76	67.86	67.854	This study	3.407		2612.4	2616.7	2609		2612.86		2612	2614.2	2609.2						2609.4	2612.1	2607
383	U1541	C	8	H	5	79	80	67.89	67.884	This study	3.349		2614.7	2618.7	2611.4		2614.79		2614.2	2617.1	2610.9						2611.7	2614.4	2609
383	U1541	C	8	H	5	84	85	67.96	67.954	This study	3.148		2620.1	2624.7	2616.4		2619.29		2619.5	2625	2615.8						2616.7	2623.1	2613.7
383	U1541	C	8	H	5	90	91	68.01	68.004	This study	2.992		2624.1	2628.1	2619.7		2622.5		2623.3	2629	2620.6						2620.4	2629.1	2617.1
383	U1541	C	8	H	5	94	95	68.06	68.054	This study	3.125		2628.1	2631.7	2624.1		2625.71		2627.9	2632.3	2624.4						2628.7	2632.4	2620.4
383	U1541	C	8	H	5	100	101	68.11	68.104	This study	3.316		2631.7	2634.8	2627.1		2628.93		2632.3	2635.4	2631.4						2631.4	2636.4	2622.4
383	U1541	C	8	H	5	105	106	68.16	68.154	This study	3.157		2634.8	2638.1	2631.1		2632.14		2635.6	2638	2633.8						2638.8	2640.1	2631.4
383	U1541	C	8	H	5	111	112	68.21	68.204	This study	3.434		2638.1	2641.1	2635.1		2635.36		2638.9	2640.7	2636.5						2641.8	2644.8	2639.8
383	U1541	C	8	H	5	115	116	68.26	68.254	This study	3.405		2640.8	2643.4	2637.8		2638.57		2640.9	2643.7	2639.3						2644.4	2648.1	2642.1
383	U1541	C	8	H	5	120	121	68.31	68.304	This study	3.509		2643.8	2646.4	2640.8		2641.79		2643.5	2647.3	2641.8						2648.1	2652.4	2645.1
383	U1541	C	8	H	5	125	126	68.36	68.354	This study	3.515		2646.4	2649.8	2643.4		2645		2647.5	2650.6	2645.3						2651.8	2655.8	2648.1
383	U1541	C	8	H	5	130	131	68.41	68.404	This study	3.27		2650.4	2653.1	2647.4		2649.02		2651.5	2655.2	2649.5						2655.8	2659.1	2653.4
383	U1541	C	8	H	5	135	136	68.46	68.454	This study	3.039		2654.1	2657.8	2651.1		2653.05		2655	2660.5	2653						2660.1	2663.5	2658.8
383	U1541	C	8	H	5	140	141	68.51	68.504	This study	2.936		2657.8	2660.8	2653.8		2657.07		2658.5	2664.5	2656.3						2663.8	2666.5	2660.8
383	U1541	C	8	H	5	145	146	68.56	68.554	This study	3.416		2661.8	2664.5	2657.5		2661.09		2661.1	2668.2	2658.5						2667.8	2668.5	2663.5
383	U1541	C	8	H	6	5	6	68.67	68.664	This study	2.963		2667.8	2671.1	2663.5		2669.94		2669.7	2673	2661.4						2673.1	2675.1	2668.8
383	U1541	C	8	H	6	10	11	68.72	68.714	This study	2.778		2671.5	2675.1	2666.5		2673.97		2672.4	2675.5	2663.3						2676.1	2678.1	2672.1
383	U1541	C	8	H	6	15	16	68.77	68.764	This study	3.001		2674.8	2678.1	2669.1		2677.99		2675.2	2677.9	2670						2679.5	2682.2	2677.1
383	U1541	C	8	H	6	20	21	68.82	68.814	This study	3.086		2677.8	2681.2	2673.1		2682.01		2678.1	2680.8	2673.9						2682.2	2685.8	2680.5
383	U1541	C	8	H	6	25	26	68.87	68.864	This study	3.276		2681.5	2689.5	2676.8		2686.03		2682.1	2683.6	2678.3						2685.5	2694.2	2683.5
383	U1541	C	8	H	6	30	31	68.92	68.914	This study	3.438		2685.5	2694.2	2679.8		2690.06		2685.8	2692.2	2682.1						2692.5	2698.2	2686.5
383	U1541	C	8	H	6	35	36	68.97	68.964	This study	3.377		2691.5	2698.8	2682.8		2694.08		2691.8	2698.4	2685.2						2696.2	2702.2	2692.5
383	U1541	C	8	H	6	40	41	69.02	69.014	This study	3.513		2695.8	2705.2	2686.2		2698.1		2695.7	2706.3	2688.5						2700.5	2707.2	2695.8
383	U1541	B	8	H	2	55	56	66.15	69.174	This study	3.562		2715.5	2722.5	2705.5		2710.98		2717.3	2720.6	2709						2716.5	2724.2	2710.2
383	U1541	B	8	H	2	60	61	66.2	69.224	This study	3.595		2719.5	2725.6	2709.9		2715		2721.1	2723.5	2716.4						2719.2	2726.6	2716.5
383	U1541	B	8	H	2	65	66	66.25	69.274	This study	3.318		2723.9	2729.2	2715.9		2718.75		2724.8	2727	2723.9						2726.2	2728.9	2724.5
383	U1541	B	8	H	2	70	71	66.3	69.324	This study	3.402		2727.9	2732.9	2721.9		2722.5		2727.9	2729.9	2726.4						2729.6	2731.2	2727.2
383	U1541	B	8	H	2	75	76	66.35	69.374	This study	3.2115		2731.2	2735.9	2726.6		2726.25		2731.6	2733.2	2729.7						2732.2	2734.6	2730.6
383	U1541	B	8	H	2	80	81	66.4	69.424	This study	3.104		2735.2	2739.6	2730.2		2730		2735.2	2736	2733.2						2735.6	2737.9	2732.9
383	U1541	B	8	H	2	85	86	66.45	69.474	This study	2.942		2738.2	2743.2	2733.6		2733.75		2738.7	2740.9	2736.7						2738.2	2741.6	2735.6
383	U1541	B	8	H	2	90	91	66.5	69.524	This study	2.848		2741.9	2746.6	2737.2		2737.5		2742.4	2744.9	2740.9						2741.2	2744.9	2737.9
383	U1541	B	8	H	2	95	96	66.55	69.574	This study	2.8625		2745.2	2750.9	2740.6		2741.25		2746.6	2749.9	2743.5						2744.2	2747.6	2740.2
383	U1541	B	8	H	2	100	101	66.6	69.624	This study	2.87		2748.6	2753.6	2742.9		2745		2750.1	2756.8	2747.3						2746.6	2749.6	2742.6
383	U1541	B	8	H	2	110	111	66.7	69.724	This study	2.973		2754.3	2758.3	2748.9		2752.5		2761.6	2769.3	2755.2						2751.3	2756.6	2747.6
383	U1541	B	8	H	2	115	116	66.75	69.774	This study	3.151		2757.6	2761.6	2751.3		2756.25		2765.8	2772.8	2759.4						2753.6	2758.9	2750.3
383	U1541	B	8	H	2	120	121	66.8	69.824	This study	3.251		2760.3	2764.9	2753.9		2760		2772.6	2775.7	2761.2						2756.3	2760.9	2752.6
383	U1541	B	8	H	2	125	126	66.85	69.874	This study	3.15		2762.6	2768.3	2756.6		2762.81		2775.7	2779.2	2765.1						2759.6	2762.6	2755.3
383	U1541	B	8	H	2	130	131	66.9	69.924	This study	3.0585		2765.3	2771.6	2759.3		2765.63		2781.2	2785.4	2769.3						2762.6	2764.6	2758.6
383	U1541	B	8	H	2	135	136	66.95	69.974	This study	3.4765		2768.3	2775.3	2762.3		2768.44		2786.5	2788.3	2773.7						2765.6	2767.3	2763.9
383	U1541	B	8	H	3	0	1	67.1	70.124	This study	3.189		2776.3	2788.3	2769.3		2776.88		2790.2	2792.9	2788						2786.6	2790.3	2778
383	U1541	B	8	H	3	5	6	67.15	70.174	This study	3.187		2781.6	2792	2772		2779.69		2791.6	2794.2	2789.6						2790.3	2794.3	2786
383	U1541	B	8	H	3	10	11	67.2	70.224	This study	3.156		2785.3	2795	2775		2782.5		2793.1	2795.5	2791.6						2794.3	2796.3	2790
383	U1541	B	8	H	3	15	16	67.25	70.274	This study	3.178		2788.3	2796.7	2778.6		2785.31		2794.4	2796.9	2793.1						2796.3	2797.3	2794.7
383	U1541	B	8	H	3	20	21	67.3	70.324	This study	3.281		2792	2799	2783.3		2788.13		2795.8	2798	2794.4						2797.7	2799	2796.7
383	U1541	B	8	H	3	25	26	67.35	70.374	This study	3.216		2794.3	2801	2787.6		2790.94		2797.3	2798.8	2796						2799	2800.7	2797.7
383	U1541	B	8	H	3	30	31	67.4	70.424	This study	3.1685		2797	2803.3	2792		2793.75		2798.6	2800.2	2797.3						2800.3	2802	2799.3
383	U1541	B	8	H	3	35	36	67.45	70.474	This study	3.20767		2800	2805.7	2795.7		2796.56		2800.2	2801	2798.6						2802	2803.7	2800.7
383	U1541	B	8	H	3	40	41	67.5	70.524	This study	3.446		2803	2808	2798.7		2799.38		2802.1	2803.7	2800.6						2803.3	2805.3	2801.7
383	U1541	B	8	H	3	45	46	67.55	70.574	This study	3.5015		2806.3	2811	2801		2802.19		2804.3	2807.4	2802.6						2805	2807	2803
383	U1541	B	8	H	3	50	51	67.6	70.624	This study	3.6085		2809	2813.3	2803.7		2805		2807.2	2810.3	2804.6						2808	2808.3	2804.3
383	U1541	B	8	H	3	55	56	67.65	70.674	This study	3.405		2812.3	2816	2807.3		2809.25		2810.7	2813.4	2807.9						2812	2815.7	2806
383	U1541	B	8	H	3	60	61	67.7	70.724	This study	3.3965		2815.3	2819.4	2811		2813.5		2814.3	2816	2811.8						2816	2818.4	2808
383	U1541	B	8	H	3	65	66	67.75	70.774	This study	3.2305		2818	2823	2814		2817.75		2817.8	2820	2816.5						2818.7	2821	2811
383	U1541	B	8	H	3	70	71	67.8	70.824	This study	3.193		2821.7	2829	2817		2822		2820.6	2824.4	2819.1						2821.4	2828.7	2815.3
383	U1541	B	8	H	3	75	76	67.85	70.874	This study	3.108		2825.7	2832	2820		2826.25		2828.1	2831.2	2822.2						2827.7	2833.4	2819.7
383	U1541	B	8	H	3	80	81	67.9	70.924	This study	3.117		2830	2836.4	2823		2830.5		2834.7	2839.6	2828.8						2831.7	2837	2823.7
383	U1541	B	8	H	3	85	86	67.95	70.974	This study	3.218		2834.4	2839	2827		2834.75		2839.8	2843.1	2835.4						2834.7	2841.7	2831.4
383	U1541	B	8	H	3	90	91	68	71.024	This study	3.138		2837.4	2841.1	2830		2839		2843.6	2845.5	2839.2						2840.1	2844.4	2834.4
383	U1541	B	8	H	3	95	96	68.05	71.074	This study	3.3945		2840.1	2843.4	2832.7		2843.25		2846.4	2847.3	2842.2						2843.4	2847.4	2839.7
383	U1541	B	8	H	3	100	101	68.1	71.124	This study	3.436		2842.4	2846.7	2835.7		2847.5		2847.7	2848.6	2846.4						2845.7	2850.1	2842.7
383	U1541	B	8	H	3	105	106	68.15	71.174	This study	3.28767		2844.1	2848.7	2838.4		2849.81		2849.3	2850.4	2847.5						2847.7	2851.4	2844.7
383	U1541	B	8	H	3	110	111	68.2	71.224	This study	3.3105		2846.1	2850.7	2842.1		2852.12		2850.8	2852.1	2849.5						2850.4	2853.1	2847.1
383	U1541	B	8	H	3	115	116	68.25	71.274	This study	3.267		2848.1	2852.4	2844.4		2854.42		2852.6	2853.9	2851						2852.7	2857.7	2848.7
383	U1541	B	8	H	3	120	121	68.3	71.324	This study	3.262		2850.4	2854.7	2847.1		2856.73		2854.1	2855.2	2852.6						2857.7	2860.7	2851.1
383	U1541	B	8	H	3	125	126	68.35	71.374	This study	3.322		2852.7	2857.1	2849.4		2859.04		2855.7	2856.1	2854.6						2860.7	2863.8	2853.1
383	U1541	B	8	H	3	130	131	68.4	71.424	This study	3.183		2855.1	2859.4	2851.4		2861.35		2857.7	2858.3	2856.6						2863.8	2865.4	2858.1
383	U1541	B	8	H	3	135	136	68.45	71.474	This study	2.931		2857.7	2862.4	2854.4		2863.65		2859.4	2860.7	2858.8						2867.8	2870.8	2861.7
383	U1541	B	8	H	3	140	141	68.5	71.524	This study	3.064		2860.4	2865.1	2856.7		2865.96		2861.4	2864.7	2859.9						2870.8	2873.8	2864.4
383	U1541	B	8	H	3	145	146	68.55	71.574	This study	3.007		2863.1	2868.4	2859.4		2868.27		2863.4	2869.3	2861.4						2873.8	2876.8	2868.1
383	U1541	B	8	H	4	0	1	68.6	71.624	This study	3.04667		2866.1	2871.1	2862.1		2870.58		2866.9	2872	2863.2						2876.8	2878.8	2871.8
383	U1541	B	8	H	4	5	6	68.65	71.674	This study	3.166		2868.8	2874.8	2864.1		2872.88		2870	2874.2	2865.1						2878.4	2880.8	2875.4
383	U1541	B	8	H	4	10	11	68.7	71.724	This study	3.128		2871.8	2878.1	2867.4		2875.19		2873.5	2876.4	2868.2						2880.8	2882.1	2878.8
383	U1541	B	8	H	4	15	16	68.75	71.774	This study	3.367		2875.1	2881.1	2871.4		2877.5		2877.3	2879.7	2876.4						2882.1	2883.8	2880.8
383	U1541	B	8	H	4	20	21	68.8	71.824	This study	3.324		2878.4	2884.4	2873.8		2879.72		2879.7	2883.2	2877.9						2883.8	2885.4	2882.4
383	U1541	B	8	H	4	25	26	68.85	71.874	This study	3.246		2881.4	2887.8	2875.8		2881.94		2881.9	2885.9	2879.7						2885.4	2887.5	2884.1
383	U1541	B	8	H	4	30	31	68.9	71.924	This study	3.28733		2884.1	2890.5	2878.1		2884.17		2883.9	2888.5	2881.7						2886.8	2889.1	2885.4
383	U1541	B	8	H	4	35	36	68.95	71.974	This study	3.3345		2887.1	2893.5	2880.8		2886.39		2885.9	2890.3	2883.4						2888.5	2891.5	2887.1
383	U1541	B	8	H	4	40	41	69	72.024	This study	3.2005		2889.8	2896.5	2883.4		2888.61		2888.1	2892.2	2885.4						2890.5	2894.1	2888.8
383	U1541	B	8	H	4	45	46	69.05	72.074	This study	3.182		2892.8	2900.5	2886.1		2890.83		2891.4	2894	2887.6						2892.5	2896.8	2890.5
383	U1541	B	8	H	4	50	51	69.1	72.124	This study	3.19		2896.1	2903.8	2889.1		2893.06		2893.1	2896.2	2890						2894.8	2899.8	2892.5
383	U1541	B	8	H	4	55	56	69.15	72.174	This study	3.1145		2899.5	2906.5	2891.8		2895.28		2895.8	2900.2	2892.5						2897.5	2902.8	2893.8
383	U1541	B	8	H	4	60	61	69.2	72.224	This study	3.031		2903.1	2908.8	2895.1		2897.5		2899.1	2903.3	2895.5						2901.1	2906.1	2895.8
383	U1541	B	8	H	4	65	66	69.25	72.274	This study	3.113		2906.1	2911.5	2898.8		2900.68		2902.2	2906.3	2899.1						2905.1	2909.5	2897.8
383	U1541	B	8	H	4	70	71	69.3	72.324	This study	3.169		2908.8	2913.5	2902.1		2903.86		2904.8	2909	2901.5						2908.8	2912.5	2901.1
383	U1541	B	8	H	4	75	76	69.35	72.374	This study	3.207		2911.2	2915.8	2905.1		2907.05		2907.9	2911.9	2903.9						2911.8	2915.5	2905.1
383	U1541	B	8	H	4	80	81	69.4	72.424	This study	3.172		2913.2	2918.2	2907.8		2910.23		2911.6	2913.6	2905.5						2914.5	2918.5	2909.2
383	U1541	B	8	H	4	85	86	69.45	72.474	This study	3.304		2915.8	2920.5	2910.2		2913.41		2914.1	2915.6	2907.2						2918.2	2922.5	2911.8
383	U1541	B	8	H	4	90	91	69.5	72.524	This study	3.112		2918.2	2922.5	2912.5		2916.59		2915.8	2917.4	2909.6						2921.5	2924.5	2915.2
383	U1541	B	8	H	4	95	96	69.55	72.574	This study	3.283		2919.8	2924.5	2915.2		2919.77		2917.4	2918.9	2912.1						2924.2	2925.5	2918.2
383	U1541	B	8	H	4	100	101	69.6	72.624	This study	3.403		2922.2	2926.5	2917.5		2922.95		2918.9	2920	2913.8						2926.5	2927.2	2923.5
383	U1541	B	8	H	4	105	106	69.65	72.674	This study	3.494		2923.8	2928.5	2919.8		2926.14		2920	2921.3	2915.6						2927.8	2928.8	2925.2
383	U1541	B	8	H	4	110	111	69.7	72.724	This study	3.3695		2925.8	2930.2	2921.8		2929.32		2921.1	2922.4	2918						2929.2	2930.5	2926.8
383	U1541	B	8	H	4	115	116	69.75	72.774	This study	3.517		2928.2	2931.9	2924.5		2932.5		2922.2	2923.3	2920						2931.2	2932.5	2928.8
383	U1541	B	8	H	4	120	121	69.8	72.824	This study	3.4495		2930.2	2933.5	2926.5		2934.39		2923.3	2924.4	2921.5						2932.5	2933.2	2930.5
383	U1541	B	8	H	4	125	126	69.85	72.874	This study	3.336		2932.9	2936.2	2929.5		2936.28		2924.6	2926	2923.3						2934.5	2935.5	2932.9
383	U1541	B	8	H	4	129	130	69.9	72.924	This study	3.308		2935.5	2940.9	2932.2		2938.16		2926.2	2927.7	2925.1						2936.2	2937.2	2935.2
383	U1541	B	8	H	4	135	136	69.95	72.974	This study	2.951		2939.9	2945.5	2936.2		2940.05		2927.7	2929	2926.6						2939.5	2944.5	2937.9
383	U1541	B	8	H	5	5	6	70.15	73.174	This study	3.53		2956.9	2960.6	2953.9		2947.61		2933	2933.7	2931.2						2973.2	2974.2	2970.9
383	U1541	B	8	H	5	10	11	70.2	73.224	This study	2.959		2960.9	2965.2	2957.2		2949.49		2939.8	2941.2	2937						2975.9	2976.2	2974.9
383	U1541	B	8	H	5	25	26	70.35	73.374	This study	3.148		2969.2	2975.9	2965.2		2955.16		2967.1	2969.1	2958.3						2980.6	2985.3	2978.6
383	U1541	B	8	H	5	30	31	70.4	73.424	This study	3.135		2972.6	2979.3	2967.6		2957.05		2972.4	2976	2966.7						2982.6	2990.6	2979.9
383	U1541	C	9	H	1	55	56	71.15	73.436	This study	3.221		2972.9	2979.9	2967.9		2957.5		2973.5	2976.8	2967.6						2982.6	2990.9	2979.9
383	U1541	C	9	H	1	60	61	71.2	73.486	This study	3.177		2976.2	2983.9	2970.2		2959		2977.7	2981	2972.4						2984.6	2992.9	2981.9
383	U1541	C	9	H	1	65	66	71.25	73.536	This study	3.142		2979.9	2987.6	2972.2		2960.5		2982.3	2989.2	2979						2986.3	2994.6	2983.3
383	U1541	C	9	H	1	70	71	71.3	73.586	This study	3.099		2983.9	2991.6	2974.9		2962		2989.6	2994	2982.3						2992.9	2996.6	2985.3
383	U1541	C	9	H	1	75	76	71.35	73.636	This study	3.101		2987.9	2995.6	2977.6		2963.5		2995.3	2998.7	2989						2995.6	2998.6	2989.6
383	U1541	C	9	H	1	80	81	71.4	73.686	This study	3.188		2991.3	2998.6	2980.9		2965		3002.8	3004.8	2994.7						2997.9	3001	2992.6
383	U1541	C	9	H	1	85	86	71.45	73.736	This study	3.211		2995.3	3002.3	2983.6		2966.5		3005.5	3007.2	3002.6						2999.9	3004.3	2997.3
383	U1541	C	9	H	1	90	91	71.5	73.786	This study	3.329		2998.6	3005	2986.6		2968		3007.7	3009.2	3005						3001.3	3008.6	3000.6
383	U1541	C	9	H	1	95	96	71.55	73.836	This study	3.221		3001.6	3007.6	2991.9		2969.5		3009.7	3011	3007						3005.3	3011.3	3003.6
383	U1541	C	9	H	1	100	101	71.6	73.886	This study	3.252		3004.3	3010	2995.6		2971		3011.2	3012.3	3009						3009.3	3015	3005.6
383	U1541	C	9	H	1	105	106	71.65	73.936	This study	3.34		3006.6	3012	2998.9		2972.5		3013	3014.3	3011						3012	3017	3008
383	U1541	C	9	H	1	110	111	71.7	73.986	This study	3.389		3009.3	3014.6	3002		2974		3014.5	3016.1	3013						3014.6	3019	3010.3
383	U1541	C	9	H	1	115	116	71.75	74.036	This study	3.329		3011.3	3017	3004.3		2975.5		3016.3	3017.4	3014.7						3017	3020.6	3012.6
383	U1541	C	9	H	1	120	121	71.8	74.086	This study	3.352		3013.6	3019	3007		2977		3017.8	3019.1	3016.7						3019.3	3022.6	3015
383	U1541	C	9	H	1	125	126	71.85	74.136	This study	3.26		3015.6	3021.3	3010		2978.5		3019.6	3020.7	3018.5						3021.3	3024.3	3017.6
383	U1541	C	9	H	1	130	131	71.9	74.186	This study	3.356		3017.6	3023.3	3012.6		2980		3021.3	3022.2	3020.7						3023	3025.7	3020
383	U1541	C	9	H	1	135	136	71.95	74.236	This study	3.052		3020.3	3025.7	3015.3		2987.86		3022.9	3023.5	3022.7						3024.7	3027.3	3022.3
383	U1541	C	9	H	1	140	141	72	74.286	This study	3.024		3022.3	3027.3	3018		2995.71		3024	3024.9	3023.3						3026.3	3028.7	3023.7
383	U1541	C	9	H	2	0	1	72.1	74.386	This study	3.068		3027	3030.7	3022.6		3011.43		3026	3026.6	3025.1						3029.3	3031	3027
383	U1541	C	9	H	2	5	6	72.15	74.436	This study	3.202		3029.7	3032.3	3025		3019.29		3027.3	3027.3	3026.4						3030.7	3032.7	3029
383	U1541	C	9	H	2	10	11	72.2	74.486	This study	2.949		3032.7	3034	3028.7		3027.14		3030.4	3032.4	3028.6						3032.7	3033.7	3031.3
383	U1541	C	9	H	2	15	16	72.25	74.536	This study	3.084		3035	3035	3034		3035		3034.1	3035	3031.9						3034.7	3035	3033.3
383	U1541	B	9	H	1	20	21	73.8	77.324	This study	3.286		3135	3135.4	3135		3140.19		3135	3135.4	3135						3135	3135.4	3135
383	U1541	B	9	H	1	25	26	73.85	77.374	This study	3.218		3143.1	3144.2	3137.5		3142.52		3141.3	3143.8	3137.7						3142.6	3144.1	3136.2
383	U1541	B	9	H	1	30	31	73.9	77.424	This study	3.172		3146.1	3148.3	3141		3144.85		3145.2	3147.1	3141.5						3145.8	3148.1	3138.9
383	U1541	B	9	H	1	35	36	73.95	77.474	This study	2.903		3148.9	3152.1	3145		3147.19		3148.5	3149.9	3147.6						3149.2	3151.5	3143.6
383	U1541	B	9	H	1	40	41	74	77.524	This study	3.073		3151.7	3155.8	3148.1		3149.52		3151.6	3152.5	3150.2						3152	3154.3	3146.7
383	U1541	B	9	H	1	45	46	74.05	77.574	This study	2.694		3154.5	3159.3	3150.5		3151.85		3155	3157.1	3152.8						3154.6	3157.3	3149.7
383	U1541	B	9	H	1	50	51	74.1	77.624	This study	2.894		3157.3	3162	3152.8		3154.19		3158	3160.1	3154.5						3156.1	3160.2	3151.8
383	U1541	B	9	H	1	55	56	74.15	77.674	This study	2.787		3159.9	3165.2	3155.2		3156.52		3160.3	3162.3	3156.3						3157.7	3162.5	3154
383	U1541	B	9	H	1	60	61	74.2	77.724	This study	2.752		3162.3	3168	3157.1		3158.85		3162.2	3164.3	3158						3159.4	3164.4	3155.9
383	U1541	B	9	H	1	65	66	74.25	77.774	This study	2.712		3165.1	3171.4	3159.2		3161.19		3164.2	3166.1	3160.5						3161.2	3166.2	3157.8
383	U1541	B	9	H	1	70	71	74.3	77.824	This study	2.872		3167.7	3175	3161.3		3163.52		3166.3	3167.5	3163.4						3162.9	3168.5	3159.7
383	U1541	B	9	H	1	75	76	74.35	77.874	This study	3.045		3170.1	3178	3163.2		3165.85		3168.2	3169.7	3165.4						3164.5	3171	3161.7
383	U1541	B	9	H	1	80	81	74.4	77.924	This study	2.871		3172.7	3181.9	3165.4		3168.19		3169.9	3171.5	3167.3						3166.5	3173.7	3163.8
383	U1541	B	9	H	1	90	91	74.5	78.024	This study	3.09		3177.3	3187	3169.2		3172.85		3173	3174.4	3171.1						3169.8	3176.6	3167.8
383	U1541	B	9	H	1	95	96	74.55	78.074	This study	3.136		3179.9	3191	3171.1		3175.15		3174.5	3175.9	3172.8						3171.5	3178.2	3169.6
383	U1541	B	9	H	1	100	101	74.6	78.124	This study	2.952		3182.4	3194.3	3173.5		3177.03		3176	3177.3	3174.3						3173	3180.4	3171.2
383	U1541	B	9	H	1	105	106	74.65	78.174	This study	2.91		3185.4	3196.5	3175.9		3178.9		3177.6	3178.7	3175.5						3174.6	3183.6	3172.9
383	U1541	B	9	H	1	110	111	74.7	78.224	This study	2.986		3188.4	3199.8	3178.3		3180.78		3178.8	3180.1	3176.8						3176.1	3187.1	3174.5
383	U1541	B	9	H	1	115	116	74.75	78.274	This study	3.088		3192.1	3202.7	3180.4		3182.65		3180	3181.3	3178.4						3177.6	3190	3175.8
383	U1541	B	9	H	1	120	121	74.8	78.324	This study	3.0915		3195	3205.7	3183.3		3184.53		3181.2	3182.5	3179.9						3179.2	3192.2	3177.3
383	U1541	B	9	H	1	125	126	74.85	78.374	This study	3.017		3197.4	3208.9	3186.3		3186.4		3182.4	3184.2	3181.4						3181.2	3194.6	3178.9
383	U1541	B	9	H	1	130	131	74.9	78.424	This study	2.8535		3200.4	3211.5	3189.9		3188.28		3184.1	3186	3182.8						3183.9	3197.2	3180.5
383	U1541	B	9	H	1	135	136	74.95	78.474	This study	2.923		3203.1	3213.8	3193.3		3190.15		3185.6	3187.5	3184.3						3187.5	3199.6	3182.3
383	U1541	B	9	H	1	140	141	75	78.524	This study	2.903		3206.2	3216.5	3196.3		3192.03		3187.3	3190	3186.1						3191.1	3202.4	3184.4
383	U1541	B	9	H	1	145	146	75.05	78.574	This study	2.798		3208.8	3219.1	3199.2		3193.9		3190.4	3192.3	3188.4						3194.5	3205.4	3186.5
383	U1541	B	9	H	2	0	1.5	75.1	78.624	This study	2.968		3211.2	3221.9	3201.9		3195.77		3193.2	3195.7	3192.6						3197.5	3208.7	3188.6
383	U1541	B	9	H	2	5	6	75.15	78.674	This study	3.02		3213.4	3224.7	3204.3		3197.65		3195.6	3198.8	3193.9						3201.1	3212	3191.6
383	U1541	B	9	H	2	10	11	75.2	78.724	This study	2.912		3215.3	3227.6	3207.6		3199.53		3197.5	3201.3	3195.4						3206	3214	3193.5
383	U1541	B	9	H	2	15	16	75.25	78.774	This study	2.901		3217.2	3230	3209.4		3201.4		3199.9	3204.1	3197						3209.1	3215.7	3195.7
383	U1541	B	9	H	2	20	21	75.3	78.824	This study	2.855		3219.1	3232.1	3212.2		3203.27		3202.4	3206.6	3199						3212.7	3217.4	3197.8
383	U1541	B	9	H	2	25	26	75.35	78.874	This study	2.772		3221.1	3234.5	3215		3205.28		3205	3208.7	3201.4						3215.6	3219.3	3200
383	U1541	B	9	H	2	30	31	75.4	78.924	This study	2.783		3223.1	3236.6	3217.6		3208.78		3207.7	3210.6	3204.2						3218.4	3221.1	3203
383	U1541	B	9	H	2	35	36	75.45	78.974	This study	2.855		3224.9	3238.8	3220.4		3212.28		3210.9	3212.5	3207.8						3221.3	3222.6	3206.1
383	U1541	B	9	H	2	40	41	75.5	79.024	This study	3.415		3227.1	3241.1	3222.8		3215.78		3213.9	3217.2	3212.6						3223.9	3224.5	3208.4
383	U1541	B	9	H	2	45	46	75.55	79.074	This study	3.057		3229.9	3243.2	3224.7		3219.28		3217.1	3223.2	3214.9						3225.9	3228.4	3213.5
383	U1541	B	9	H	2	50	51	75.6	79.124	This study	3.097		3233.3	3245.5	3226.4		3222.78		3223.3	3225.3	3217.1						3227.8	3230.9	3219.2
383	U1541	B	9	H	2	55	56	75.65	79.174	This study	3.07833		3237	3247.4	3228.6		3226.28		3226.5	3227.5	3223.7						3229.5	3233.3	3222.2
383	U1541	B	9	H	2	60	61	75.7	79.224	This study	2.9795		3240.5	3249.4	3230.7		3229.78		3229.9	3232.2	3227.1						3231.1	3235.9	3225
383	U1541	B	9	H	2	64.5	65.5	75.75	79.274	This study	3.023		3243.3	3251.3	3233		3233.28		3233.3	3236.1	3229.8						3232.7	3238	3227.7
383	U1541	B	9	H	2	70	71	75.8	79.324	This study	2.9805		3245.8	3253	3235.4		3236.78		3236.5	3239.4	3233.6						3234.5	3239.8	3230.3
383	U1541	B	9	H	2	75	76	75.85	79.374	This study	2.881		3248.4	3254.8	3238.4		3240.25		3239.6	3243.1	3237.8						3236.2	3241.9	3232.9
383	U1541	B	9	H	2	80	81	75.9	79.424	This study	2.937		3250.8	3257	3241.8		3243.38		3243.1	3246.7	3240.5						3238.1	3243.6	3234.9
383	U1541	B	9	H	2	85	86	75.95	79.474	This study	2.967		3253.1	3259.2	3245.3		3246.5		3246.5	3252.8	3243.7						3240	3246	3236.9
383	U1541	B	9	H	2	90	91	76	79.524	This study	2.902		3255.5	3261.7	3248.6		3249.63		3250.2	3254.9	3246.8						3242.1	3248.7	3238.9
383	U1541	B	9	H	2	95	96	76.05	79.574	This study	3.169		3257.7	3264.6	3252.1		3252.75		3254.3	3257.5	3252.7						3244.4	3250.8	3241.1
383	U1541	B	9	H	2	100	101	76.1	79.624	This study	2.915		3259.4	3266.7	3254.2		3255.88		3257.9	3260.1	3255.4						3246.9	3252.7	3243.5
383	U1541	B	9	H	2	105	106	76.15	79.674	This study	2.965		3261.6	3268.9	3256.4		3259		3260.8	3262.2	3258.3						3249.8	3254.5	3245.7
383	U1541	B	9	H	2	110	111	76.2	79.724	This study	3.108		3263.9	3271.2	3259		3262.13		3262.9	3264.2	3261.4						3252.5	3257	3250.5
383	U1541	B	9	H	2	113.5	114.5	76.25	79.774	This study	3.273		3266.5	3273.3	3261.6		3265.16		3264.5	3266.1	3263.3						3255.2	3259.6	3252.4
383	U1541	B	9	H	2	120	121	76.3	79.824	This study	3.111		3269.2	3275.4	3264		3267.16		3266	3267.7	3264.7						3258.6	3263.3	3254.5
383	U1541	B	9	H	2	125	126	76.35	79.874	This study	3.141		3272	3277.1	3266.2		3269.16		3267.4	3269.2	3266.1						3261.1	3266.4	3256.5
383	U1541	B	9	H	2	130	131	76.4	79.924	This study	3.076		3274.3	3279	3268.2		3271.16		3268.9	3270.6	3267.6						3263.4	3268.6	3258.6
383	U1541	B	9	H	2	135	136	76.45	79.974	This study	3.061		3276.5	3280.9	3270.4		3273.16		3270.5	3272.3	3269						3266.2	3270.6	3260
383	U1541	B	9	H	2	140	141	76.5	80.024	This study	3.002		3278.5	3282.5	3272.3		3275.16		3272.1	3273.8	3270.4						3268.3	3272.8	3261.7
383	U1541	B	9	H	2	144	145	76.55	80.074	This study	3.062		3280.5	3284.4	3274.4		3277.16		3273.9	3275.5	3272.1						3270.3	3274.6	3263.4
383	U1541	B	9	H	3	0	1	76.6	80.124	This study	3.268		3282.4	3286.1	3276.6		3279.16		3276.1	3277.4	3274.2						3272.4	3276.6	3265.4
383	U1541	B	9	H	3	5	6	76.65	80.174	This study	3.029		3284.1	3288	3278.9		3281.16		3278.8	3280	3277.1						3274.7	3278.2	3268.2
383	U1541	B	9	H	3	10	11	76.7	80.224	This study	3.019		3285.8	3290.5	3281		3283.16		3281.7	3282.5	3279.6						3277.8	3279.8	3270.8
383	U1541	B	9	H	3	15	16	76.75	80.274	This study	3.147		3287.5	3292.6	3283.4		3285.16		3285	3286.8	3282.4						3279.9	3281.4	3274.2
383	U1541	B	9	H	3	20	21	76.8	80.324	This study	3.47		3289.6	3295.2	3286.1		3287.16		3288	3289.2	3287.6						3282	3283.4	3279.7
383	U1541	B	9	H	3	25	26	76.85	80.374	This study	3.56		3291.7	3297.7	3288.5		3289.16		3289.9	3290.9	3288.9						3284	3285.3	3282.7
383	U1541	B	9	H	3	30	31	76.9	80.424	This study	3.179		3293.8	3299.6	3290.4		3291.16		3291.4	3292.4	3290.6						3286.2	3286.5	3285.6
383	U1541	B	9	H	3	35	36	76.95	80.474	This study	3.759		3296	3302.2	3292.3		3293.16		3293	3293.9	3292.6						3292.1	3295.7	3288.1
383	U1541	B	9	H	3	40	41	77	80.524	This study	3.573		3298.1	3304.4	3294.1		3295.25		3294.3	3295.3	3293.5						3299.8	3303.3	3291.1
383	U1541	B	9	H	3	45	46	77.05	80.574	This study	3.5355		3300.2	3306.4	3296		3298.38		3295.7	3296.8	3294.7						3303.8	3308.6	3298.9
383	U1541	B	9	H	3	50	51	77.1	80.624	This study	3.357		3302.4	3309.1	3298		3301.5		3297.2	3298	3296.1						3309.6	3310.8	3302.8
383	U1541	B	9	H	3	55	56	77.15	80.674	This study	3.428		3304.8	3312	3300		3304.63		3298.6	3299.6	3297.4						3311	3312.7	3306.4
383	U1541	B	9	H	3	60	61	77.2	80.724	This study	3.336		3307.6	3316.1	3301.9		3307.75		3300.3	3301.3	3299						3312.5	3314.7	3310.9
383	U1541	B	9	H	3	65	66	77.25	80.774	This study	3.574		3310.4	3320	3304.2		3310.88		3302.1	3302.5	3300.8						3314.3	3316.7	3313.3
383	U1541	B	9	H	3	70	71	77.3	80.824	This study	2.975		3313.5	3323.5	3307		3314		3308.4	3309.8	3307.6						3316.1	3319.4	3315.6
383	U1541	B	9	H	3	75	76	77.35	80.874	This study	3.325		3316.8	3326.5	3309.3		3317.12		3311.7	3312.5	3310.2						3318	3321.5	3317.1
383	U1541	B	9	H	3	80	81	77.4	80.924	This study	2.888		3320	3329.1	3312.2		3320.12		3318.1	3319.9	3314.8						3319.7	3322.8	3318.7
383	U1541	B	9	H	3	85	86	77.45	80.974	This study	2.892		3323.7	3331.7	3314.2		3321.66		3321.2	3322.5	3319.2						3321.1	3324.3	3320
383	U1541	B	9	H	3	90	91	77.5	81.024	This study	3.063		3327	3333.8	3316.6		3323.2		3324.2	3327.3	3322.7						3322.7	3325.7	3321.4
383	U1541	B	9	H	3	95	96	77.55	81.074	This study	2.97		3329.9	3335.7	3318.8		3324.74		3327.2	3330.2	3324.8						3324.2	3327.4	3322.9
383	U1541	B	9	H	3	100	101	77.6	81.124	This study	3.022		3332.7	3337.6	3321.4		3326.28		3330.3	3333.7	3327						3326	3329.6	3324.3
383	U1541	B	9	H	3	105	106	77.65	81.174	This study	3.16		3334.5	3339.3	3324.4		3327.82		3333.2	3337.8	3329.2						3327.9	3333.9	3325.8
383	U1541	B	9	H	3	110	111	77.7	81.224	This study	3.04		3336.6	3341.2	3327.1		3329.35		3336.1	3342.7	3332.1						3330.8	3337.7	3327.2
383	U1541	B	9	H	3	115	116	77.75	81.274	This study	3.142		3338.6	3343	3329.4		3330.89		3339.1	3345.1	3335.3						3333.6	3339.8	3328.8
383	U1541	B	9	H	3	120	121	77.8	81.324	This study	3.226		3340.6	3344.7	3331.6		3332.43		3342.2	3347.3	3339.1						3336.2	3341.7	3330.8
383	U1541	B	9	H	3	125	126	77.85	81.374	This study	3.015		3342.4	3346.4	3333.7		3333.97		3348.2	3350.7	3343.1						3338.5	3343.9	3332.7
383	U1541	B	9	H	3	135	136	77.95	81.474	This study	3.093		3345.7	3349.3	3337.5		3337.05		3352.9	3354.5	3348.5						3342.8	3347.4	3335.7
383	U1541	B	9	H	3	140	141	78	81.524	This study	3.059		3347.6	3350.9	3340.2		3338.58		3355	3356.3	3352.7						3344.7	3349	3337.9
383	U1541	B	9	H	3	145	146	78.05	81.574	This study	3.3505		3349.4	3352.3	3343.2		3340.17		3357.3	3357.5	3356.6						3346.3	3350.4	3340
383	U1541	B	9	H	4	0	2	78.11	81.634	This study	3.031		3351.5	3354.7	3345.8		3342.77		3367.8	3368.3	3365.3						3348.2	3352.7	3342.9
383	U1541	B	9	H	4	5	6	78.16	81.684	This study	3.209		3353.4	3356.7	3348.6		3344.93		3373.7	3376.4	3372.6						3350	3354.4	3345
383	U1541	B	9	H	4	9	10	78.21	81.734	This study	3.103		3355.2	3358.7	3351.1		3347.09		3377.2	3379.7	3375.2						3352	3356.6	3347.3
383	U1541	B	9	H	4	15	16	78.26	81.784	This study	3.181		3357.1	3360.8	3353.6		3349.25		3380.4	3382.5	3378						3354.3	3358.2	3349.7
383	U1541	B	9	H	4	20	21	78.31	81.834	This study	3.148		3359.6	3363.1	3356		3351.41		3384.7	3387.4	3381						3357.7	3360	3352.9
383	U1541	B	9	H	4	25	26	78.36	81.884	This study	2.827		3362	3365.7	3358.1		3353.57		3389.6	3393.5	3387.6						3360.1	3362.2	3355.8
383	U1541	B	9	H	4	30	31	78.41	81.934	This study	2.83		3364.1	3368.6	3360.2		3355.73		3393.3	3396.1	3390.7						3362.1	3364.7	3358.8
383	U1541	B	9	H	4	35	36	78.46	81.984	This study	2.812		3366	3371.2	3362.3		3357.89		3396.2	3399.4	3393.5						3364.3	3366.9	3361.5
383	U1541	B	9	H	4	40	41	78.51	82.034	This study	2.876		3367.6	3373.3	3363.8		3360.05		3399.1	3404.9	3395.3						3366.7	3369.5	3364
383	U1541	B	9	H	4	45	46	78.56	82.084	This study	2.8455		3369.4	3375.5	3365.5		3362.21		3402.4	3408.6	3397.2						3369.5	3376.5	3366.6
383	U1541	B	9	H	4	55	56	78.66	82.184	This study	2.941		3373	3379.2	3368.4		3366.53		3409.6	3412.4	3405						3385	3388.2	3379.1
383	U1541	B	9	H	4	60	61	78.71	82.234	This study	2.7865		3374.9	3381.7	3370		3368.69		3413.3	3415.1	3409.6						3388.9	3391.2	3386.9
383	U1541	B	9	H	4	65	66	78.76	82.284	This study	2.801		3377.1	3384.1	3372		3370.85		3416.2	3417.8	3413						3391.2	3393.6	3389.1
383	U1541	B	9	H	4	70	71	78.81	82.334	This study	2.865		3379.8	3387.4	3374		3373.01		3419.6	3422.3	3415.9						3393.4	3395.8	3390.9
383	U1541	B	9	H	4	75	76	78.86	82.384	This study	2.961		3382.6	3389.8	3376.1		3375.27		3423.2	3426.4	3418.5						3395.1	3397.8	3392.5
383	U1541	B	9	H	4	80	81	78.91	82.434	This study	2.9005		3385.7	3392.4	3378.5		3378.6		3427.6	3428.8	3420.8						3396.9	3399.4	3394.2
383	U1541	B	9	H	4	85	86	78.96	82.484	This study	2.904		3388.7	3395.4	3381.5		3381.93		3429.4	3430.6	3425.6						3398.6	3401.1	3396.1
383	U1541	B	9	H	4	90	91	79.01	82.534	This study	2.948		3391.2	3397.2	3384.6		3385.27		3431.1	3432.1	3429.6						3400.3	3402.9	3397.9
383	U1541	B	9	H	4	95	96	79.06	82.584	This study	2.715		3393.6	3400.2	3387.8		3388.6		3432.7	3433.4	3432.6						3402.1	3404.7	3399.8
383	U1541	B	9	H	4	100	101	79.11	82.634	This study	2.807		3395.8	3404.2	3390.1		3391.93		3433.7	3434.5	3433.2						3403.6	3406.8	3401.5
383	U1541	B	9	H	4	105	106	79.16	82.684	This study	2.6485		3398.1	3407.7	3392.7		3395.13		3434.7	3435.7	3434						3405.4	3408.7	3403
383	U1541	B	9	H	4	110	111	79.21	82.734	This study	2.7255		3400.8	3409.1	3395		3396.71		3435.7	3436.7	3434.8						3407.2	3410.5	3404.8
383	U1541	B	9	H	4	115	116	79.26	82.784	This study	2.74		3404.2	3410.9	3397.2		3398.3		3436.7	3437.7	3435.6						3408.9	3412	3406
383	U1541	B	9	H	4	120	121	79.31	82.834	This study	2.696		3408.1	3412.8	3399.4		3399.88		3437.6	3438.8	3436.6						3410.7	3413.6	3407.7
383	U1541	B	9	H	4	125	126	79.36	82.884	This study	2.757		3410.4	3414.1	3402.1		3401.46		3438.6	3439.7	3437.4						3412.4	3415.4	3409.2
383	U1541	B	9	H	4	130	131	79.41	82.934	This study	2.778		3412.3	3415.4	3406.4		3403.05		3439.6	3440.6	3438.5						3414.1	3417.1	3410.7
383	U1541	B	9	H	4	135	136	79.46	82.984	This study	2.715		3414	3417.3	3410.5		3404.63		3440.5	3441.6	3439.5						3416	3418.8	3412.2
383	U1541	B	9	H	4	140	141	79.51	83.034	This study	2.652		3415.7	3418.7	3412.6		3406.22		3441.5	3442.4	3440.6						3417.8	3420.4	3413.7
383	U1541	B	9	H	4	143.5	144.5	79.56	83.084	This study	2.761		3417.3	3420.3	3414.2		3407.8		3442.4	3443.9	3441.8						3419.5	3422.2	3415.1
383	U1541	B	9	H	5	0	1	79.61	83.134	This study	2.9235		3418.9	3421.9	3416.1		3409.39		3443.9	3445.2	3443.1						3421.3	3424.2	3416.8
383	U1541	B	9	H	5	5	6	79.66	83.184	This study	2.865		3420.5	3423.4	3417.6		3410.97		3445.5	3446.4	3444.4						3422.7	3426.1	3418.4
383	U1541	B	9	H	5	10	11	79.71	83.234	This study	2.823		3422.1	3425.1	3419.1		3412.56		3447	3447.5	3445.9						3424.3	3427.7	3419.9
383	U1541	B	9	H	5	20	21	79.81	83.334	This study	3.028		3425.1	3428.1	3421.8		3415.73		3450	3451.2	3448.7						3426.8	3431.1	3422.4
383	U1541	B	9	H	5	30	31	79.91	83.434	This study	2.8325		3428.2	3431	3424.1		3418.89		3452.9	3454	3452.6						3429.1	3434.7	3424.7
383	U1541	B	9	H	5	35	36	79.96	83.484	This study	2.878		3429.9	3432.8	3425.9		3420.48		3454.3	3455.5	3453.3						3430.6	3436.3	3426
383	U1541	B	9	H	5	40	41	80.01	83.534	This study	2.898		3431.5	3434.4	3427.6		3422.06		3455.7	3457	3454.4						3432	3438.1	3427.4
383	U1541	B	9	H	5	45	46	80.06	83.584	This study	2.916		3433.2	3436.4	3428.9		3423.65		3457	3458.4	3455.6						3433.5	3439.9	3428.7
383	U1541	C	10	H	2	35	36	81.27	83.648	This study	2.887		3435.6	3438.9	3430.7		3425.68		3458.5	3459.8	3457						3436.9	3442.1	3430.5
383	U1541	C	10	H	2	40	41	81.32	83.698	This study	2.874		3437.5	3440.9	3432.1		3427.26		3459.8	3460.9	3458.4						3439.7	3443.8	3431.9
383	U1541	C	10	H	2	45	46	81.37	83.748	This study	2.796		3439.7	3442.6	3433.3		3428.85		3461	3462.1	3459.8						3442.5	3445.4	3433.2
383	U1541	C	10	H	2	50	51	81.42	83.798	This study	2.82		3441.9	3444.7	3434.9		3430.43		3462.3	3468.1	3461.5						3445.1	3447.2	3434.8
383	U1541	C	10	H	2	55	56	81.47	83.848	This study	3.037		3443.9	3446.6	3436.5		3432.01		3465.1	3470.7	3463.4						3447.6	3449.8	3436.4
383	U1541	C	10	H	2	60	61	81.52	83.898	This study	2.793		3446	3448.7	3438.1		3433.6		3468.6	3473.7	3467.6						3450.1	3452	3438
383	U1541	C	10	H	2	65	66	81.57	83.948	This study	2.827		3447.8	3450.5	3439.4		3435.18		3471.6	3475.7	3470.1						3451.8	3453.4	3439.6
383	U1541	C	10	H	2	70	71	81.62	83.998	This study	2.802		3449.6	3452.4	3441.2		3436.77		3474.5	3477.4	3472.8						3453.3	3455.2	3441.2
383	U1541	C	10	H	2	75	76	81.67	84.048	This study	2.799		3451.3	3454.2	3442.4		3438.35		3477.4	3479	3475.9						3455	3457	3442.9
383	U1541	C	10	H	2	80	81	81.72	84.098	This study	2.734		3453	3455.8	3444.2		3439.94		3480	3480	3480						3456.9	3459	3444.4
383	U1541	C	10	H	2	85	86	81.77	84.148	This study	3.09		3454.7	3457.5	3446.1		3443.43		NaN	NaN	NaN						3459.3	3460.3	3446.1
383	U1541	C	10	H	3	4	5	81.87	84.248	This study	3.087		3457.6	3460.1	3449.6		3450.57		NaN	NaN	NaN						3461.1	3462.8	3448.4
383	U1541	C	10	H	3	9	10	81.92	84.298	This study	2.909		3459.2	3461.7	3451.1		3454.14		NaN	NaN	NaN						3462.6	3464	3449.9
383	U1541	C	10	H	3	14	15	81.97	84.348	This study	3.047		3460.8	3463.1	3453		3457.71		NaN	NaN	NaN						3464	3465.4	3451.2
383	U1541	C	10	H	3	19	20	82.02	84.398	This study	2.943		3462.4	3464.7	3454.9		3461.29		NaN	NaN	NaN						3465.2	3466.8	3453.1
383	U1541	C	10	H	3	24	25	82.07	84.448	This study	3.153		3463.9	3466.2	3456.4		3464.86		NaN	NaN	NaN						3466.5	3468.1	3459.7
383	U1541	C	10	H	3	29	30	82.12	84.498	This study	2.989		3465.5	3467.6	3458.3		3466.92		NaN	NaN	NaN						3467.9	3469.4	3461
383	U1541	C	10	H	3	34	35	82.17	84.548	This study	2.861		3467.1	3469.1	3460.1		3468.92		NaN	NaN	NaN						3469.3	3470.8	3462.6
383	U1541	C	10	H	3	39	40	82.22	84.598	This study	2.877		3468.6	3470.5	3461.9		3470.92		NaN	NaN	NaN						3470.6	3472.1	3464.1
383	U1541	C	10	H	3	49	50	82.32	84.698	This study	3.059		3471.3	3472.5	3465.5		3474.92		NaN	NaN	NaN						3472.5	3474	3467.3
383	U1541	C	10	H	3	53.5	55	82.37	84.748	This study	2.908		3472.8	3474.4	3468		3476.92		NaN	NaN	NaN						3473.9	3475.1	3469.3
383	U1541	C	10	H	3	59	60	82.42	84.798	This study	2.988		3474.6	3476.2	3470.2		3478.92		NaN	NaN	NaN						3475.1	3476.4	3471.4
383	U1541	C	10	H	3	64	65	82.47	84.848	This study	2.906		3476.3	3478	3472.3		3480.92		NaN	NaN	NaN						3476.4	3477.5	3474.1
383	U1541	C	10	H	3	74	75	82.57	84.948	This study	2.807		3480	3480	3479.6		3484.92		NaN	NaN	NaN						3480	3480	3479.8

## Sheet: TableS6_1090_alignments
Table S6: ODP Site 1090 Alignments of benthic foraminiferal δ18O
ODP Site 1090 Benthic foraminferal δ18O values are from Venz and Hodell (2002) and Hodell et al. (2000).
HMM-Match-based alignments generated using the automated probabilistic HMM-Match algorithm of Lin et al. (2014) and user defined tie points listed in Table 1. Manual alignment based on the user-defined tie points in Table S4.
Alignment targets refer to Prob-stack (Ahn et al., 2017), LR04 (Lisiecki and Raymo, 2005), LR09 Pacific (Lisiecki and Raymo, 2009), and CENOGRID (Westerhold et al. 2020).
									HMM-Match Standard Alignment to Prob-stack				Manual alignment to LR04		HMM-Match Alignment to LR04				HMM-Match Alignment to LR09 Atlantic				HMM-Match Alignment to CENOGRID				HMM-Match Alignment B to Probstack
Leg	Site/Hole	Core	Section	Sect. Depth top (cm)	sect. depth bottom (cm)	Depth (mcd)	avg. Cibs δ18O [‰ PDB]		Output age (ka)	95% Confidence Upper Age Limit (ka)	95% Confidence Lower Age Limit (ka)		interpolated age (ka)		Output age (ka)	95% Confidence Upper Age Limit (ka)	95% Confidence Lower Age Limit (ka)		Output age (ka)	95% Confidence Upper Age Limit (ka)	95% Confidence Lower Age Limit (ka)		Output age (ka)	95% Confidence Upper Age Limit (ka)	95% Confidence Lower Age Limit (ka)		Depth (mcd)	avg. Cibs δ18O [‰ PDB]	Output age (ka)	95% Confidence Upper Age Limit (ka)	95% Confidence Lower Age Limit (ka)
TTNO57	6	PC4	IX	3	5	0.03	2.73		0	0.2824	0		0		2.5414	3.3885	0.5647		0.8496	4.8145	0.2832		0	0	0		0.03	2.73	0	0.2824	0
TTNO57	6	PC4	IX	6	8	0.06	2.75		0.8471	2.8237	0.5647		0.947368		3.3885	3.9532	2.5414		4.8145	5.9474	4.5313		0.5664	1.416	0.5664		0.06	2.75	0.8471	2.8237	0.5647
TTNO57	6	PC4	IX	9	11	0.09	2.685		1.9766	3.9532	1.1295		1.89474		4.2356	4.8003	3.6708		5.6642	6.5138	4.8145		1.416	2.2657	0.8496		0.09	2.685	1.9766	3.9532	1.1295
TTNO57	6	PC4	IX	12	14	0.12	2.63		2.8237	5.0827	1.9766		2.84211		5.0827	5.3651	4.518		6.2306	7.3634	5.6642		2.2657	2.8321	1.416		0.12	2.63	2.8237	5.0827	1.9766
TTNO57	6	PC4	IX	15	17	0.15	2.76		3.6708	6.2122	2.5414		3.78947		5.6475	6.2122	5.6475		6.797	7.9298	6.2306		2.8321	3.6817	2.2657		0.15	2.76	3.6708	6.2122	2.5414
TTNO57	6	PC4	IX	18	20	0.18	2.67		4.8003	7.0593	3.3885		4.73684		6.4946	6.7769	6.2122		7.6466	8.213	7.0802		3.6817	4.5313	2.8321		0.18	2.67	4.8003	7.0593	3.3885
TTNO57	6	PC4	IX	21	23	0.21	2.71		5.6475	7.9064	4.2356		5.68421		7.3417	7.3417	6.7769		8.213	8.4962	7.9298		4.5313	5.0977	3.6817		0.21	2.71	5.6475	7.9064	4.2356
TTNO57	6	PC4	IX	24	26	0.24	2.84		6.7769	8.7536	5.0827		6.63158		7.9064	8.4712	7.6241		8.7794	9.0627	8.7794		5.0977	5.9474	4.5313		0.24	2.84	6.7769	8.7536	5.0827
TTNO57	6	PC4	IX	27	29	0.27	2.75		7.9064	9.3183	6.2122		7.57895		8.7536	9.3183	8.4712		9.3459	9.3459	9.0627		5.6642	6.2306	5.0977		0.27	2.75	7.9064	9.3183	6.2122
TTNO57	6	PC4	IX	30	32	0.3	3.06		8.7536	10.1654	7.6241		8.52632		9.6007	9.883	9.6007		9.6291	10.1955	9.6291		6.5138	7.0802	5.6642		0.3	3.06	8.7536	10.1654	7.6241
TTNO57	6	PC4	IX	33	35	0.33	2.92		9.883	11.0125	8.1888		9.47368		10.1654	10.4478	9.883		10.1955	10.4787	9.9123		7.0802	7.6466	6.5138		0.33	2.92	9.883	11.0125	8.1888
TTNO57	6	PC4	IX	36	38	0.36	2.95		10.7302	11.8596	9.3183		10.4211		10.7302	11.0125	10.4478		10.7619	11.0451	10.1955		7.6466	8.213	7.0802		0.36	2.95	10.7302	11.8596	9.3183
TTNO57	6	PC4	IX	39	41	0.39	2.885		11.8596	12.7068	10.4478		11.3684		11.2949	11.2949	11.0125		11.3283	11.3283	10.4787		8.213	8.4962	7.9298		0.39	2.885	11.8596	12.7068	10.4478
TTNO57	6	PC4	IX	42	44	0.42	3.56		12.9891	14.401	11.5773		12.3158		12.7068	13.2715	12.7068		13.594	13.8772	12.7444		8.7794	9.3459	8.7794		0.42	3.56	12.9891	14.401	11.5773
TTNO57	6	PC4	IX	45	47	0.45	3.665		14.401	15.5305	12.9891		13.2632		13.5539	13.8363	13.5539		14.1604	14.7268	13.8772		9.3459	9.9123	9.0627		0.45	3.665	14.401	15.5305	12.9891
TTNO57	6	PC4	IX	48	50	0.48	3.82		15.5305	16.66	14.1186		14.2105		14.1186	14.401	13.8363		15.01	15.2932	14.7268		9.9123	10.7619	9.6291		0.48	3.82	15.5305	16.66	14.1186
TTNO57	6	PC4	IX	51	53	0.51	4.005		16.66	17.7895	14.9657		15.1579		14.6834	14.6834	14.6834		15.5764	15.8596	15.5764		10.7619	11.3283	10.1955		0.51	4.005	16.66	17.7895	14.9657
TTNO57	6	PC4	IX	54	56	0.54	3.975		17.5071	18.919	16.0952		16.1053		14.9657	14.9657	14.9657		16.1429	16.1429	15.8596		11.3283	11.8947	11.0451		0.54	3.975	17.5071	18.919	16.0952
TTNO57	6	PC4	IX	57	59	0.57	3.755		18.3542	20.3308	17.2247		17.0526		15.2481	15.2481	15.2481		16.4261	16.4261	16.1429		12.4612	12.4612	11.8947		0.57	3.755	18.3542	20.3308	17.2247
TTNO57	6	PC4	IX	60	62	0.6	4.38		20.0485	22.5898	18.3542		18		18.3542	19.7661	17.5071		18.1253	19.2581	17.5589		13.8772	16.1429	13.594		0.6	4.38	20.0485	22.5898	18.3542
TTNO57	6	PC4	IX	63	65	0.63	4.23		21.7427	24.8488	19.4837		18.6947		21.1779	22.5898	19.4837		20.1078	22.0902	19.5414		15.8596	18.1253	14.4436		0.63	4.23	21.7427	24.8488	19.4837
TTNO57	6	PC4	IX	72	74	0.72	4.17		26.543	29.6491	22.5898		20.7789		24.284	25.1312	23.7193		24.3559	25.4887	22.9398		19.5414	22.0902	17.8421		0.72	4.17	26.543	29.6491	22.5898
TTNO57	6	PC4	IX	80	82	0.78	4.03		29.3668	32.4728	25.6959		22.1684		25.9783	26.8254	25.6959		26.6216	28.0376	25.7719		21.807	25.2055	19.8246		0.78	4.03	29.3668	32.4728	25.6959
TTNO57	6	PC4	IX	81	83	0.81	4.13		30.7786	33.8847	26.8254		22.8632		26.8254	27.9549	26.543		27.4712	28.8872	26.3383		22.6566	27.188	20.6742		0.81	4.13	30.7786	33.8847	26.8254
TTNO57	6	PC4	IX	87	89	0.87	4.21		33.6023	35.5789	29.3668		24.2526		29.0844	29.3668	28.2373		30.0201	30.3033	28.604		24.3559	29.7368	22.6566		0.87	4.21	33.6023	35.5789	29.3668
TTNO57	6	PC4	IX	93	95	0.93	3.72		36.1437	37.5556	32.7552		25.6421		37.8379	38.4027	35.8613		37.9499	38.2331	36.817		26.0551	33.4185	24.6391		0.93	3.72	36.1437	37.5556	32.7552
TTNO57	6	PC4	IX	99	101	0.99	3		38.1203	38.4027	37.5556		27.0316		40.6617	40.944	40.6617		40.782	41.0652	40.782		27.7544	35.9674	26.0551		0.99	3	38.1203	38.4027	37.5556
TTNO57	6	PC4	IX	102	104	1.02	4.15		38.9674	40.0969	38.1203		27.7263		40.944	41.2264	40.944		41.3484	41.3484	41.0652		28.604	37.1003	26.9048		1.02	4.15	38.9674	40.0969	38.1203
TTNO57	6	PC4	VIII	0	2	1.03	4.01		39.2498	40.3793	38.1203		27.9579		40.944	41.2264	40.944		41.3484	41.3484	41.0652		28.8872	37.3835	26.9048		1.03	4.01	39.2498	40.3793	38.1203
TTNO57	6	PC4	VIII	9	11	1.12	3.87		41.7911	43.4854	39.8145		30.0421		42.0735	42.6383	41.7911		42.198	43.3308	41.9148		31.1529	39.6491	28.8872		1.12	3.87	41.7911	43.4854	39.8145
TTNO57	6	PC4	VIII	15	17	1.18	3.97		43.203	45.462	40.944		31.4316		42.6383	43.4854	42.3559		43.3308	44.4637	42.7644		32.8521	41.0652	30.5865		1.18	3.97	43.203	45.462	40.944
TTNO57	6	PC4	VIII	18	20	1.21	3.81		44.0501	46.3091	42.0735		32.1263		43.203	44.3325	42.6383		44.1805	45.3133	43.614		33.7018	41.9148	31.4361		1.21	3.81	44.0501	46.3091	42.0735
TTNO57	6	PC4	VIII	21	23	1.24	3.8		45.1796	47.4386	42.6383		32.8211		43.7678	45.1796	43.203		45.0301	45.8797	44.1805		34.5514	42.7644	32.2857		1.24	3.8	45.1796	47.4386	42.6383
TTNO57	6	PC4	VIII	24	26	1.27	3.83		46.0267	48.5681	43.203		33.5158		44.3325	46.0267	44.0501		45.8797	46.7293	45.0301		35.401	43.3308	33.1353		1.27	3.83	46.0267	48.5681	43.203
TTNO57	6	PC4	VIII	27	29	1.3	3.71		46.8739	49.4152	44.0501		34.2105		45.1796	46.8739	44.6149		46.7293	47.8622	45.5965		36.2506	44.1805	34.2682		1.3	3.71	46.8739	49.4152	44.0501
TTNO57	6	PC4	VIII	30	32	1.33	3.79		47.721	50.5447	45.1796		34.9053		46.0267	47.4386	45.462		47.5789	48.7118	46.4461		37.1003	45.0301	35.1178		1.33	3.79	47.721	50.5447	45.1796
TTNO57	6	PC4	VIII	33	35	1.36	3.79		48.5681	51.3918	46.0267		35.6		46.8739	48.2857	46.0267		48.4286	49.5614	47.0125		37.9499	45.8797	35.9674		1.36	3.79	48.5681	51.3918	46.0267
TTNO57	6	PC4	VIII	36	38	1.39	3.84		49.4152	52.2389	46.8739		36.2947		47.721	49.1328	46.5915		49.2782	50.411	47.8622		38.7995	46.7293	36.817		1.39	3.84	49.4152	52.2389	46.8739
TTNO57	6	PC4	VIII	42	44	1.45	3.83		50.8271	53.9332	48.0033		37.6842		48.5681	50.5447	47.721		50.411	51.8271	49.2782		40.2155	47.8622	38.2331		1.45	3.83	50.8271	53.9332	48.0033
TTNO57	6	PC4	VIII	51	53	1.54	3.94		52.8037	56.1921	50.2623		39.7684		50.5447	52.8037	48.8505		52.6767	53.2431	51.5439		42.198	49.8446	40.2155		1.54	3.94	52.8037	56.1921	50.2623
TTNO57	6	PC4	VIII	84	86	1.87	3.64		57.0393	60.7101	54.4979		47.4105		55.0627	56.4745	52.2389		56.0752	56.6416	54.9424		46.4461	53.5263	44.1805		1.87	3.64	57.0393	60.7101	54.4979
TTNO57	6	PC4	VIII	105	107	2.08	3.81		60.4277	64.9457	57.604		52.2737		58.4511	59.2982	56.7569		58.3409	60.8897	57.4912		50.411	56.3584	47.2957		2.08	3.81	60.4277	64.9457	57.604
TTNO57	6	PC4	VIII	117	119	2.2	3.86		62.9691	67.2047	59.863		55.0526		60.9925	61.5572	60.4277		60.8897	62.589	59.7569		52.6767	58.6241	50.1278		2.2	3.86	62.9691	67.2047	59.863
TTNO57	6	PC4	VIII	129	131	2.32	3.7		65.2281	70.0284	62.4043		57.8316		63.5338	63.8162	63.5338		63.1554	63.7218	62.0226		55.5088	60.8897	52.9599		2.32	3.7	65.2281	70.0284	62.4043
TTNO57	6	PC4	VIII	135	137	2.38	3.7		66.9223	71.4403	63.8162		59.2211		64.0986	64.381	64.0986		64.005	64.2882	63.7218		57.4912	62.589	54.9424		2.38	3.7	66.9223	71.4403	63.8162
TTNO57	6	PC4	VIII	138	140	2.41	3.75		68.0518	72.2874	64.9457		59.9158		64.381	65.2281	64.381		64.5714	65.1378	64.005		58.3409	63.4386	56.0752		2.41	3.75	68.0518	72.2874	64.9457
TTNO57	6	PC4	VIII	141	143	2.44	3.83		68.8989	73.1345	66.0752		60.6105		65.2281	66.0752	64.6633		65.4211	65.9875	64.5714		59.7569	64.2882	57.4912		2.44	3.83	68.8989	73.1345	66.0752
TTNO57	6	PC4	VIII	144	146	2.47	3.86		70.0284	73.9816	67.2047		61.3053		65.7928	66.9223	65.2281		65.9875	66.8371	65.4211		61.7393	65.4211	58.9073		2.47	3.86	70.0284	73.9816	67.2047
TTNO57	6	PC4	VIII	147	149	2.5	3.88		71.1579	74.8287	68.3342		62		66.6399	67.4871	65.7928		66.8371	67.6867	65.9875		63.7218	66.5539	60.6065		2.5	3.88	71.1579	74.8287	68.3342
TTNO57	6	PC4	VII	0	2	2.54	3.83		72.5698	75.9582	69.746		63.3134		67.4871	68.6165	66.6399		67.9699	68.8195	67.1203		66.2707	67.9699	62.589		2.54	3.83	72.5698	75.9582	69.746
TTNO57	6	PC4	VII	3	5	2.57	3.78		73.6992	76.8053	70.8755		64.2985		68.3342	69.1813	67.4871		68.8195	69.386	67.6867		67.6867	69.1028	64.5714		2.57	3.78	73.6992	76.8053	70.8755
TTNO57	6	PC4	VII	6	8	2.6	3.7		75.1111	77.9348	72.2874		65.2836		69.1813	69.746	68.0518		69.6692	70.2356	68.5363		68.8195	70.2356	66.8371		2.6	3.7	75.1111	77.9348	72.2874
TTNO57	6	PC4	VII	9	11	2.63	3.69		76.2406	79.3467	73.1345		66.2687		69.746	70.3108	68.8989		70.2356	70.802	69.6692		69.9524	71.0852	68.5363		2.63	3.69	76.2406	79.3467	73.1345
TTNO57	6	PC4	VII	12	14	2.66	3.71		77.6525	80.4762	74.264		67.2537		70.3108	70.8755	69.746		71.0852	71.3684	70.5188		70.802	72.218	69.6692		2.66	3.71	77.6525	80.4762	74.264
TTNO57	6	PC4	VII	15	17	2.69	3.4		79.3467	82.7352	75.3935		68.2388		71.1579	71.4403	70.5931		71.6516	72.218	71.6516		71.9348	73.0677	70.5188		2.69	3.4	79.3467	82.7352	75.3935
TTNO57	6	PC4	VII	18	20	2.72	3.535		80.4762	84.7118	76.523		69.2239		71.7226	72.2874	71.1579		72.5013	73.0677	71.9348		72.7845	73.9173	71.3684		2.72	3.535	80.4762	84.7118	76.523
TTNO57	6	PC4	VII	21	23	2.75	3.565		81.8881	86.9708	77.6525		70.209		72.5698	72.8521	72.005		73.0677	73.6341	72.5013		73.6341	74.7669	72.218		2.75	3.565	81.8881	86.9708	77.6525
TTNO57	6	PC4	VII	24	26	2.78	3.52		83.5823	88.665	78.782		71.194		73.1345	73.4169	72.5698		73.9173	74.4837	73.0677		74.4837	75.6165	73.0677		2.78	3.52	83.5823	88.665	78.782
TTNO57	6	PC4	VII	27	29	2.81	3.45		85.2765	90.0769	79.6291		72.1791		73.9816	74.264	73.6992		74.4837	75.8997	73.9173		75.3333	76.4662	73.9173		2.81	3.45	85.2765	90.0769	79.6291
TTNO57	6	PC4	VII	30	32	2.84	3.4		86.9708	91.4887	80.7586		73.1642		75.1111	75.9582	74.264		75.3333	77.0326	74.7669		76.183	77.3158	74.7669		2.84	3.4	86.9708	91.4887	80.7586
TTNO57	6	PC4	VII	33	35	2.87	3.45		88.665	92.9006	81.8881		74.1493		75.9582	76.8053	75.3935		76.183	77.8822	75.6165		76.7494	78.1654	75.6165		2.87	3.45	88.665	92.9006	81.8881
TTNO57	6	PC4	VII	36	38	2.9	3.29		90.0769	94.0301	83.0175		75.1343		77.0877	77.6525	76.2406		77.0326	78.7318	76.4662		77.599	79.015	76.4662		2.9	3.29	90.0769	94.0301	83.0175
TTNO57	6	PC4	VII	39	41	2.93	3.37		91.7711	94.8772	84.7118		76.1194		77.9348	79.0643	77.3701		77.8822	79.2982	77.599		78.4486	79.8647	77.3158		2.93	3.37	91.7711	94.8772	84.7118
TTNO57	6	PC4	VII	42	44	2.96	3.33		93.183	95.7243	86.406		77.1045		79.0643	79.6291	78.4996		78.7318	79.8647	78.1654		79.2982	80.7143	78.1654		2.96	3.33	93.183	95.7243	86.406
TTNO57	6	PC4	VII	45	47	2.99	3.29		94.3124	96.8538	87.8179		78.0896		79.6291	80.4762	79.6291		79.5815	80.4311	79.015		80.1479	81.5639	78.7318		2.99	3.29	94.3124	96.8538	87.8179
TTNO57	6	PC4	VII	48	50	3.02	3.235		95.4419	97.4185	89.2297		79.0746		80.4762	81.0409	79.9114		80.1479	80.7143	79.5815		80.9975	82.4135	79.5815		3.02	3.235	95.4419	97.4185	89.2297
TTNO57	6	PC4	VII	51	53	3.05	3.26		96.5714	98.8304	92.3358		80.0597		81.3233	81.8881	80.4762		80.9975	81.5639	80.1479		81.8471	83.2632	80.4311		3.05	3.26	96.5714	98.8304	92.3358
TTNO57	6	PC4	VII	54	56	3.08	3.13		97.7009	99.6775	94.0301		81.0448		82.1704	82.4528	81.3233		81.5639	82.1303	80.7143		82.6967	84.1128	81.2807		3.08	3.13	97.7009	99.6775	94.0301
TTNO57	6	PC4	VII	57	59	3.11	3.22		98.2657	100.807	95.4419		82.0299		82.7352	83.2999	81.8881		82.1303	82.6967	81.2807		83.5464	84.9624	82.1303		3.11	3.22	98.2657	100.807	95.4419
TTNO57	6	PC4	VII	60	62	3.14	3.09		99.1128	101.372	96.5714		83.0149		83.5823	83.8647	82.4528		82.4135	83.2632	82.1303		84.396	85.812	82.9799		3.14	3.09	99.1128	101.372	96.5714
TTNO57	6	PC4	VII	63	65	3.17	3.08		99.9599	102.219	97.7009		84		84.147	84.4294	83.2999		83.2632	84.1128	82.6967		84.9624	86.3784	83.8296		3.17	3.08	99.9599	102.219	97.7009
TTNO57	6	PC4	VII	69	71	3.23	3.36		101.372	103.631	99.1128		84.96		85.2765	86.406	84.7118		84.6792	85.5288	84.396		86.6617	88.3609	85.2456		3.23	3.36	101.372	103.631	99.1128
TTNO57	6	PC4	VII	78	80	3.32	3.41		103.348	105.607	100.807		86.4		86.406	88.665	85.8413		86.3784	87.7945	85.5288		88.6441	93.1754	87.5113		3.32	3.41	103.348	105.607	100.807
TTNO57	6	PC4	VII	123	125	3.77	3.37		108.431	110.408	105.89		93.6		91.7711	97.7009	90.6416		91.4762	92.3258	90.3434		99.6892	101.955	96.2907		3.77	3.37	108.431	110.408	105.89
TTNO57	6	PC4	VII	126	128	3.8	3.345		108.996	110.972	106.454		94.08		92.3358	98.2657	91.7711		92.3258	93.4586	91.193		101.105	103.088	97.7068		3.8	3.345	108.996	110.972	106.454
TTNO57	6	PC4	VII	135	137	3.89	3.3		111.255	112.667	108.713		95.52		97.9833	101.089	96.8538		100.256	101.105	94.0251		105.92	107.619	101.672		3.89	3.3	111.255	112.667	108.713
TTNO57	6	PC4	VII	138	140	3.92	3.06		111.82	113.231	109.561		96		99.3952	102.219	98.8304		101.672	102.238	97.7068		107.619	109.318	103.937		3.92	3.06	111.82	113.231	109.561
TTNO57	6	PC4	VII	141	143	3.95	3.225		112.667	114.079	110.69		100.333		102.501	103.913	100.807		103.088	103.937	99.9724		109.602	111.584	106.203		3.95	3.225	112.667	114.079	110.69
TTNO57	6	PC4	VII	144	146	3.98	3.17		113.514	114.643	111.82		104.667		105.325	105.325	104.76		105.07	105.353	102.521		111.584	115.266	108.469		3.98	3.17	113.514	114.643	111.82
TTNO57	6	PC4	VII	147	149	4.01	3.33		114.361	115.49	112.949		109		109.561	109.843	108.149		108.752	109.885	107.053		115.266	117.814	111.584		4.01	3.33	114.361	115.49	112.949
TTNO57	6	PC4	VI	0	2	4.05	3.14		115.208	116.338	114.079		110.478		113.514	114.361	112.949		112.717	113.283	112.717		119.514	121.213	116.682		4.05	3.14	115.208	116.338	114.079
TTNO57	6	PC4	VI	3	5	4.08	3		116.055	116.902	114.926		111.587		114.643	115.208	114.643		113.85	114.133	113.566		121.496	122.346	120.647		4.08	3	116.055	116.902	114.926
TTNO57	6	PC4	VI	6	8	4.11	3.015		116.62	117.749	115.773		112.696		115.49	115.773	114.926		114.416	114.983	114.133		122.346	122.912	121.779		4.11	3.015	116.62	117.749	115.773
TTNO57	6	PC4	VI	9	11	4.14	2.975		117.467	118.314	116.62		113.804		116.055	116.338	115.773		115.266	115.266	114.699		122.912	123.762	122.346		4.14	2.975	117.467	118.314	116.62
TTNO57	6	PC4	VI	12	14	4.17	2.87		118.032	119.161	117.185		114.913		116.62	117.185	116.338		115.832	116.115	115.549		123.762	124.328	122.912		4.17	2.87	118.032	119.161	117.185
TTNO57	6	PC4	VI	15	17	4.2	2.74		118.879	119.726	118.032		116.022		117.185	117.467	116.902		116.682	116.965	116.115		124.328	124.895	123.762		4.2	2.74	118.879	119.726	118.032
TTNO57	6	PC4	VI	18	20	4.23	2.69		119.444	120.291	118.597		117.13		117.749	117.749	117.749		117.531	117.814	116.682		124.895	125.461	124.328		4.23	2.69	119.444	120.291	118.597
TTNO57	6	PC4	VI	21	23	4.26	2.665		120.291	121.138	119.444		118.239		118.032	118.032	118.032		117.814	118.098	117.531		125.744	126.028	124.895		4.26	2.665	120.291	121.138	119.444
TTNO57	6	PC4	VI	24	26	4.29	3.09		121.138	121.42	120.291		119.348		118.314	118.314	118.314		118.381	118.381	118.098		126.311	126.311	125.461		4.29	3.09	121.138	121.42	120.291
TTNO57	6	PC4	VI	27	29	4.32	2.65		121.985	123.115	121.138		120.457		119.726	121.138	118.879		119.231	120.363	118.664		126.877	127.444	126.028		4.32	2.65	121.985	123.115	121.138
TTNO57	6	PC4	VI	30	32	4.35	2.505		122.832	124.526	121.985		121.565		121.703	123.115	119.726		120.647	123.195	119.514		127.727	128.01	126.877		4.35	2.505	122.832	124.526	121.985
TTNO57	6	PC4	VI	33	35	4.38	2.585		123.679	125.373	122.832		122.674		122.832	124.244	120.573		121.496	124.895	120.363		128.293	128.576	127.444		4.38	2.585	123.679	125.373	122.832
TTNO57	6	PC4	VI	36	38	4.41	2.57		124.809	126.503	123.397		123.783		123.962	125.091	121.985		124.045	126.311	121.213		128.86	129.143	128.01		4.41	2.57	124.809	126.503	123.397
TTNO57	6	PC4	VI	39	41	4.44	2.58		125.938	127.915	124.526		124.891		125.091	125.938	123.679		125.461	127.16	124.045		129.426	129.993	128.86		4.44	2.58	125.938	127.915	124.526
TTNO57	6	PC4	VI	42	44	4.47	2.575		127.35	129.044	125.656		126		126.221	127.35	125.091		127.16	128.293	126.594		130.276	130.276	129.426		4.47	2.575	127.35	129.044	125.656
TTNO57	6	PC4	VI	45	47	4.5	3.12		128.48	130.456	126.785		127.082		128.48	130.738	127.632		130.559	131.125	129.143		130.842	131.409	130.559		4.5	3.12	128.48	130.456	126.785
TTNO57	6	PC4	VI	48	50	4.53	3.54		129.891	131.586	128.197		128.164		131.586	131.868	129.327		131.692	131.975	131.692		131.692	132.258	131.692		4.53	3.54	129.891	131.586	128.197
TTNO57	6	PC4	VI	51	53	4.56	3.66		131.021	132.433	129.327		129.246		132.15	132.433	131.586		132.258	132.258	131.975		132.541	132.825	132.541		4.56	3.66	131.021	132.433	129.327
TTNO57	6	PC4	VI	54	56	4.59	3.9		132.15	133.562	130.738		130.328		132.715	132.998	132.715		132.541	132.825	132.541		132.825	133.391	132.825		4.59	3.9	132.15	133.562	130.738
TTNO57	6	PC4	VI	57	59	4.62	3.86		133.28	134.127	131.868		131.41		133.28	133.28	132.998		133.108	133.391	132.825		133.391	133.957	133.108		4.62	3.86	133.28	134.127	131.868
TTNO57	6	PC4	VI	60	62	4.65	3.99		134.127	134.974	132.433		132.492		133.562	133.845	133.562		133.391	133.674	133.108		133.957	134.241	133.674		4.65	3.99	134.127	134.974	132.433
TTNO57	6	PC4	VI	63	65	4.68	4.13		134.974	135.821	133.28		133.574		134.127	134.127	133.845		133.674	133.957	133.674		134.524	135.09	133.957		4.68	4.13	134.974	135.821	133.28
TTNO57	6	PC4	VI	66	68	4.71	3.55		136.104	136.386	134.127		134.656		134.409	134.409	134.409		134.241	134.241	133.957		135.373	135.373	134.241		4.71	3.55	136.104	136.386	134.127
TTNO57	6	PC4	VI	69	71	4.74	4.11		136.951	137.798	134.692		135.738		135.539	136.104	134.974		135.09	135.373	134.524		135.94	136.506	134.807		4.74	4.11	136.951	137.798	134.692
TTNO57	6	PC4	VI	75	77	4.8	3.98		138.645	139.774	136.104		137.902		136.951	137.233	136.668		137.073	138.489	135.09		137.356	138.489	136.223		4.8	3.98	138.645	139.774	136.104
TTNO57	6	PC4	VI	80	82	4.83	4.27		139.492	140.904	136.951		138.984		137.798	138.363	137.516		137.639	139.338	135.657		138.206	139.338	137.073		4.83	4.27	139.492	140.904	136.951
TTNO57	6	PC4	VI	87	89	4.92	4.31		141.469	143.445	139.21		142.23		140.057	141.186	139.492		140.188	141.321	136.79		140.188	141.321	138.489		4.92	4.31	141.469	143.445	139.21
TTNO57	6	PC4	VI	90	92	4.95	4.16		142.316	144.292	140.057		143.311		141.186	142.598	140.622		141.038	142.17	137.639		141.038	142.17	139.055		4.95	4.16	142.316	144.292	140.057
TTNO57	6	PC4	VI	96	98	5.01	4.21		144.01	146.551	141.469		145.475		143.163	144.292	141.469		142.454	143.587	139.055		142.454	143.87	140.471		5.01	4.21	144.01	146.551	141.469
TTNO57	6	PC4	VI	102	104	5.07	4.12		145.704	148.81	143.163		147.639		145.422	147.116	143.163		143.87	145.852	140.754		143.587	145.286	141.887		5.07	4.12	145.704	148.81	143.163
TTNO57	6	PC4	VI	105	107	5.1	4.15		146.269	149.94	144.01		148.721		146.551	148.528	144.292		144.436	147.268	141.604		144.436	146.135	142.737		5.1	4.15	146.269	149.94	144.01
TTNO57	6	PC4	VI	108	110	5.13	4.11		147.399	151.069	144.857		149.803		147.963	149.375	145.139		145.286	148.401	142.17		145.286	146.985	143.587		5.13	4.11	147.399	151.069	144.857
TTNO57	6	PC4	VI	111	113	5.16	4.12		148.246	152.199	145.987		150.885		148.81	150.222	146.269		146.135	149.534	142.737		145.852	147.835	144.153		5.16	4.12	148.246	152.199	145.987
TTNO57	6	PC4	VI	120	122	5.25	3.99		151.069	154.74	148.246		154.131		151.352	152.764	148.246		147.835	152.083	144.719		148.118	149.817	146.135		5.25	3.99	151.069	154.74	148.246
TTNO57	6	PC4	VI	123	125	5.28	4.06		152.199	155.87	149.093		155.213		152.199	153.611	150.505		148.401	152.932	145.286		148.967	150.95	146.702		5.28	4.06	152.199	155.87	149.093
TTNO57	6	PC4	VI	126	128	5.31	4.08		153.328	157.281	150.505		156.295		153.328	154.458	151.917		148.967	154.065	146.135		149.817	152.366	147.551		5.31	4.08	153.328	157.281	150.505
TTNO57	6	PC4	VI	129	131	5.34	4		154.458	158.411	151.634		157.377		154.458	155.305	153.046		149.534	155.198	146.702		151.233	153.215	148.401		5.34	4	154.458	158.411	151.634
TTNO57	6	PC4	VI	132	134	5.37	4.13		155.87	159.541	152.481		158.459		155.587	156.434	154.458		150.383	156.614	147.551		152.649	154.348	149.251		5.37	4.13	155.87	159.541	152.481
TTNO57	6	PC4	VI	135	137	5.4	4.13		157.281	160.67	153.611		159.541		156.717	157.281	155.87		151.233	157.747	148.118		153.782	155.198	150.1		5.4	4.13	157.281	160.67	153.611
TTNO57	6	PC4	VI	138	140	5.43	4.03		158.411	162.082	154.458		160.623		157.564	158.411	156.999		152.083	158.88	148.967		154.632	156.048	150.95		5.43	4.03	158.411	162.082	154.458
TTNO57	6	PC4	VI	141	143	5.46	4.13		159.541	163.211	155.587		161.705		158.411	159.541	157.846		153.215	159.729	149.817		155.481	156.897	152.649		5.46	4.13	159.541	163.211	155.587
TTNO57	6	PC4	V	0	2	5.49	3.95		160.952	164.341	156.999		162.787		159.258	160.67	158.693		154.065	160.579	150.667		156.048	157.747	153.499		5.49	3.95	160.952	164.341	156.999
TTNO57	6	PC4	V	4	6	5.52	3.98		162.082	165.47	158.129		163.869		159.823	161.235	159.258		155.481	161.145	151.516		156.897	159.163	154.632		5.52	3.98	162.082	165.47	158.129
TTNO57	6	PC4	V	6	8	5.55	3.97		162.929	166.317	159.541		164.951		160.67	161.799	159.823		156.897	161.712	152.083		157.747	160.579	155.764		5.55	3.97	162.929	166.317	159.541
TTNO57	6	PC4	V	12	14	5.61	3.9		164.906	168.012	161.517		167.115		161.799	162.929	160.67		160.579	162.561	153.782		159.446	162.845	157.464		5.61	3.9	164.906	168.012	161.517
TTNO57	6	PC4	V	15	17	5.64	3.96		165.47	168.859	162.647		168.197		162.364	163.494	161.517		161.145	163.128	154.348		160.296	164.261	158.313		5.64	3.96	165.47	168.859	162.647
TTNO57	6	PC4	V	18	20	5.67	3.93		166.317	169.988	163.494		169.279		163.211	164.341	162.082		161.712	163.694	155.198		161.145	165.96	158.88		5.67	3.93	166.317	169.988	163.494
TTNO57	6	PC4	V	24	26	5.73	3.9		168.294	172.247	165.47		171.443		164.623	165.188	163.494		162.561	164.544	160.579		162.845	170.208	160.579		5.73	3.9	168.294	172.247	165.47
TTNO57	6	PC4	V	27	29	5.76	4.08		169.424	173.659	166.6		172.525		165.188	165.47	164.341		163.411	165.393	161.712		163.694	172.19	161.429		5.76	4.08	169.424	173.659	166.6
TTNO57	6	PC4	V	30	32	5.79	3.94		170.553	174.789	167.729		173.607		166.317	168.576	165.47		163.977	165.96	162.845		164.827	173.607	162.561		5.79	3.94	170.553	174.789	167.729
TTNO57	6	PC4	V	33	35	5.82	3.91		171.683	175.918	168.859		174.689		168.576	169.988	166.882		164.827	167.376	163.694		166.243	175.023	163.694		5.82	3.91	171.683	175.918	168.859
TTNO57	6	PC4	V	36	38	5.85	3.89		172.812	177.048	169.706		175.77		170.271	171.118	168.859		165.393	169.358	164.544		167.659	175.872	165.11		5.85	3.89	172.812	177.048	169.706
TTNO57	6	PC4	V	39	41	5.88	3.86		173.941	178.459	171.4		176.852		171.965	172.247	170.271		166.243	171.341	165.393		169.358	177.005	166.81		5.88	3.86	173.941	178.459	171.4
TTNO57	6	PC4	V	42	44	5.91	3.7		175.353	179.589	172.53		177.934		174.506	175.918	172.812		167.376	175.306	166.526		171.341	178.138	168.509		5.91	3.7	175.353	179.589	172.53
TTNO57	6	PC4	V	45	47	5.94	3.88		176.765	181.001	173.941		179.016		176.765	177.612	175.636		168.509	179.554	167.659		173.323	179.837	170.774		5.94	3.88	176.765	181.001	173.941
TTNO57	6	PC4	V	48	50	5.97	3.88		178.459	182.13	175.353		180.098		177.895	179.307	177.048		169.642	180.687	168.792		175.023	180.687	172.474		5.97	3.88	178.459	182.13	175.353
TTNO57	6	PC4	V	51	53	6	3.91		179.871	183.26	176.765		181.18		179.024	181.566	178.742		171.341	182.103	170.774		176.439	181.536	174.456		6	3.91	179.871	183.26	176.765
TTNO57	6	PC4	V	54	56	6.03	3.77		181.283	184.389	178.459		182.262		180.154	182.695	179.589		175.589	182.952	172.19		178.421	182.669	176.155		6.03	3.77	181.283	184.389	178.459
TTNO57	6	PC4	V	57	59	6.06	3.85		182.413	185.519	180.154		183.344		181.566	183.542	180.719		177.288	183.802	175.589		180.12	183.802	177.855		6.06	3.85	182.413	185.519	180.154
TTNO57	6	PC4	V	60	62	6.09	3.85		183.825	186.648	181.566		184.426		183.542	184.389	181.848		180.404	184.368	178.704		182.103	184.935	179.837		6.09	3.85	183.825	186.648	181.566
TTNO57	6	PC4	V	63	65	6.12	3.97		185.236	187.778	182.977		185.508		184.954	185.236	184.672		182.103	185.218	180.97		183.802	185.785	181.536		6.12	3.97	185.236	187.778	182.977
TTNO57	6	PC4	V	66	68	6.15	3.89		186.648	189.19	184.389		186.59		186.366	188.06	185.801		184.085	186.351	182.669		185.501	187.201	183.236		6.15	3.89	186.648	189.19	184.389
TTNO57	6	PC4	V	69	71	6.18	3.86		188.06	190.884	186.366		187.672		188.06	189.472	187.213		186.068	187.484	185.218		187.201	188.333	185.218		6.18	3.86	188.06	190.884	186.366
TTNO57	6	PC4	V	72	74	6.21	3.51		189.472	192.861	187.778		188.754		190.601	191.449	189.754		190.033	190.599	189.749		188.617	189.466	186.917		6.21	3.51	189.472	192.861	187.778
TTNO57	6	PC4	V	81	83	6.3	3.12		193.708	197.378	191.731		192		193.708	194.272	191.731		193.714	194.847	192.015		190.882	192.582	189.749		6.3	3.12	193.708	197.378	191.731
TTNO57	6	PC4	V	87	89	6.36	3.24		196.814	200.484	193.99		196		195.119	196.249	192.861		195.13	196.83	193.714		192.582	193.431	191.165		6.36	3.24	196.814	200.484	193.99
TTNO57	6	PC4	V	90	92	6.39	3.14		198.226	202.461	195.402		198		195.967	198.226	193.708		195.98	197.962	194.564		193.148	194.281	192.015		6.39	3.14	198.226	202.461	195.402
TTNO57	6	PC4	V	93	95	6.42	3.06		199.92	203.873	196.814		200		196.814	202.461	193.99		196.546	199.378	195.413		193.998	195.13	192.865		6.42	3.06	199.92	203.873	196.814
TTNO57	6	PC4	V	96	98	6.45	3.23		201.896	205.285	198.226		202		197.943	204.155	194.555		197.396	203.06	195.98		194.847	195.98	193.431		6.45	3.23	201.896	205.285	198.226
TTNO57	6	PC4	V	102	104	6.51	3.24		205.002	207.826	201.896		206		204.72	206.414	195.402		205.609	206.175	196.83		196.263	197.396	194.847		6.51	3.24	205.002	207.826	201.896
TTNO57	6	PC4	V	105	107	6.54	3.26		206.414	209.238	203.591		208		206.414	207.544	196.249		207.025	207.308	197.396		197.113	198.246	195.697		6.54	3.26	206.414	209.238	203.591
TTNO57	6	PC4	V	108	110	6.57	3.06		208.109	210.932	205.002		210		208.109	209.803	196.814		208.441	210.14	198.812		197.962	199.662	196.546		6.57	3.06	208.109	210.932	205.002
TTNO57	6	PC4	V	114	116	6.63	3.04		210.932	213.756	207.826		214		211.215	213.474	198.79		211.556	214.955	206.742		199.945	202.21	197.962		6.63	3.04	210.932	213.756	207.826
TTNO57	6	PC4	V	123	125	6.72	3.03		215.733	217.709	212.627		220		216.58	217.709	201.896		217.504	218.637	214.955		203.06	205.609	201.078		6.72	3.03	215.733	217.709	212.627
TTNO57	6	PC4	V	126	128	6.75	3.12		217.427	219.121	214.321		222		217.709	218.274	202.744		218.92	219.486	218.637		203.91	206.742	202.777		6.75	3.12	217.427	219.121	214.321
TTNO57	6	PC4	V	129	131	6.78	3.29		219.121	220.815	216.58		224		218.839	219.404	203.591		219.769	220.053	219.769		205.043	208.158	203.627		6.78	3.29	219.121	220.815	216.58
TTNO57	6	PC4	V	132	134	6.81	3.06		220.815	224.769	218.274		226		220.251	220.251	204.155		220.336	220.336	220.053		206.175	209.291	204.476		6.81	3.06	220.815	224.769	218.274
TTNO57	6	PC4	V	138	140	6.87	3.32		227.592	230.416	224.769		230		229.004	229.286	205.002		226.85	228.832	225.717		208.441	211.84	205.892		6.87	3.32	227.592	230.416	224.769
TTNO57	6	PC4	V	141	143	6.9	3.14		229.286	232.393	226.745		231.111		232.957	233.522	205.85		228.266	232.514	227.699		209.574	212.689	207.025		6.9	3.14	229.286	232.393	226.745
TTNO57	6	PC4	V	144	146	6.93	3.235		231.546	233.804	229.004		232.222		233.804	234.369	206.697		232.514	233.363	231.664		211.273	214.105	208.158		6.93	3.235	231.546	233.804	229.004
TTNO57	6	PC4	V	147	149	6.96	3.16		232.957	235.216	230.981		233.333		234.369	235.216	207.262		233.647	234.213	232.797		212.689	215.238	209.291		6.96	3.16	232.957	235.216	230.981
TTNO57	6	PC4	IV	0	2	7	3.07		234.934	236.911	233.24		234.815		235.499	236.346	208.391		234.779	235.346	234.213		214.672	217.504	211.84		7	3.07	234.934	236.911	233.24
TTNO57	6	PC4	IV	3	5	7.03	3.01		236.346	238.322	234.652		235.926		236.346	238.322	209.238		235.346	236.479	234.779		216.371	219.203	213.539		7.03	3.01	236.346	238.322	234.652
TTNO57	6	PC4	IV	6	8	7.06	2.96		237.758	239.452	235.781		237.037		238.04	240.582	210.368		236.479	240.727	235.629		218.07	220.619	215.238		7.06	2.96	237.758	239.452	235.781
TTNO57	6	PC4	IV	9	11	7.09	2.94		239.17	240.864	236.911		238.156		240.582	241.429	211.497		237.612	241.86	236.479		219.769	221.752	217.221		7.09	2.94	239.17	240.864	236.911
TTNO57	6	PC4	IV	12	14	7.12	3.13		240.582	242.276	238.322		239.327		241.711	242.276	212.627		241.293	242.993	240.727		221.469	222.885	218.637		7.12	3.13	240.582	242.276	238.322
TTNO57	6	PC4	IV	15	17	7.15	3.18		241.993	243.405	239.734		240.498		242.558	243.123	213.474		242.709	243.842	242.143		222.885	223.734	221.185		7.15	3.18	241.993	243.405	239.734
TTNO57	6	PC4	IV	18	20	7.18	3.015		243.123	245.099	241.429		241.668		243.405	243.405	216.58		243.276	244.409	242.993		224.018	224.301	222.885		7.18	3.015	243.123	245.099	241.429
TTNO57	6	PC4	IV	21	23	7.21	3.41		244.535	247.076	242.558		242.839		243.97	244.535	218.839		244.975	245.258	244.125		225.434	226.283	224.584		7.21	3.41	244.535	247.076	242.558
TTNO57	6	PC4	IV	45	47	7.46	3.86		253.571	259.218	247.923		252.595		250.182	258.653	228.439		256.587	261.118	250.356		250.639	259.418	230.815		7.46	3.86	253.571	259.218	247.923
TTNO57	6	PC4	IV	69	71	7.7	3.97		262.042	267.689	254.135		261.961		257.524	266.842	251.594		265.932	267.348	257.719		263.1	268.764	251.772		7.7	3.97	262.042	267.689	254.135
TTNO57	6	PC4	IV	78	80	7.79	4.01		265.995	271.36	257.806		265.473		265.713	269.101	254.135		268.764	269.331	265.649		267.915	272.729	255.737		7.79	4.01	265.995	271.36	257.806
TTNO57	6	PC4	IV	81	83	7.82	3.93		267.407	272.772	259.218		266.644		267.407	270.231	256.394		269.614	270.18	267.065		269.614	274.429	257.153		7.82	3.93	267.407	272.772	259.218
TTNO57	6	PC4	IV	84	86	7.85	3.99		268.819	274.184	261.477		267.815		268.819	271.36	258.089		270.464	271.03	268.764		271.313	275.845	259.135		7.85	3.99	268.819	274.184	261.477
TTNO57	6	PC4	IV	87	89	7.88	3.89		270.231	275.313	263.736		268.985		270.513	272.49	259.218		271.596	272.446	270.18		273.012	276.977	260.835		7.88	3.89	270.231	275.313	263.736
TTNO57	6	PC4	IV	99	101	8	3.89		275.313	279.831	271.078		275.431		277.29	277.29	266.277		276.977	290.005	275.845		278.11	281.226	269.614		8	3.89	275.313	279.831	271.078
TTNO57	6	PC4	IV	114	116	8.15	3.33		282.09	287.455	279.549		284.098		299.597	299.88	281.526		299.634	299.917	282.075		286.04	288.306	283.774		8.15	3.33	282.09	287.455	279.549
TTNO57	6	PC4	IV	117	119	8.18	3.34		283.502	289.149	280.961		285.831		300.444	301.292	282.373		300.2	300.767	283.491		287.739	289.722	285.19		8.18	3.34	283.502	289.149	280.961
TTNO57	6	PC4	IV	120	122	8.21	3.32		285.196	290.844	282.655		287.564		301.292	302.139	283.22		300.767	301.616	284.907		289.439	291.421	286.606		8.21	3.32	285.196	290.844	282.655
TTNO57	6	PC4	IV	123	125	8.24	3.22		286.891	293.103	284.067		289.298		302.139	302.986	284.914		301.333	302.183	287.173		291.138	293.12	287.739		8.24	3.22	286.891	293.103	284.067
TTNO57	6	PC4	IV	126	128	8.27	3.3		288.585	296.209	285.479		291.031		302.986	303.268	286.608		301.9	303.033	288.306		292.837	295.386	288.872		8.27	3.3	288.585	296.209	285.479
TTNO57	6	PC4	IV	129	131	8.3	3.39		290.561	298.185	287.173		292.764		303.55	304.115	287.738		302.466	303.599	292.271		294.253	299.634	290.288		8.3	3.39	290.561	298.185	287.173
TTNO57	6	PC4	IV	132	134	8.33	3.39		292.538	300.727	288.867		294.498		304.398	305.245	288.585		303.316	304.449	296.802		298.501	303.882	292.837		8.33	3.39	292.538	300.727	288.867
TTNO57	6	PC4	IV	135	137	8.36	3.33		295.644	302.421	290.279		296.209		304.962	305.81	289.714		303.882	305.015	301.333		300.2	305.582	295.103		8.36	3.33	295.644	302.421	290.279
TTNO57	6	PC4	IV	138	140	8.39	3.29		297.903	303.833	292.256		297.78		305.81	306.657	291.126		304.449	305.298	303.316		304.449	307.847	299.634		8.39	3.29	297.903	303.833	292.256
TTNO57	6	PC4	IV	144	146	8.45	3.355		302.421	306.939	298.75		300.921		306.939	307.221	299.88		306.148	306.714	304.449		308.413	310.679	305.582		8.45	3.355	302.421	306.939	298.75
TTNO57	6	PC4	IV	147	149	8.48	3.26		304.68	308.633	301.292		302.491		307.786	308.351	302.703		306.714	307.281	305.015		310.113	312.378	307.564		8.48	3.26	304.68	308.633	301.292
TTNO57	6	PC4	III	0	2	8.51	3.24		306.374	310.045	302.986		304.061		308.633	309.198	304.962		307.564	308.413	305.865		311.812	316.06	309.546		8.51	3.24	306.374	310.045	302.986
TTNO57	6	PC4	III	3	5	8.54	3.27		308.351	311.739	305.245		305.632		309.48	310.327	307.504		308.413	309.546	306.998		314.644	317.476	311.246		8.54	3.27	308.351	311.739	305.245
TTNO57	6	PC4	III	6	8	8.57	3.21		310.045	313.151	307.221		307.202		310.327	312.304	309.198		309.263	311.246	307.847		316.627	318.892	312.378		8.57	3.21	310.045	313.151	307.221
TTNO57	6	PC4	III	9	11	8.6	3.15		312.022	314.845	309.763		308.773		312.022	314.281	310.327		310.113	312.378	308.98		318.043	320.308	316.627		8.6	3.15	312.022	314.845	309.763
TTNO57	6	PC4	III	12	14	8.63	2.99		313.716	316.54	311.739		310.343		314.563	316.257	312.587		311.812	313.795	310.113		319.459	321.724	318.043		8.63	2.99	313.716	316.54	311.739
TTNO57	6	PC4	III	14.5	16.5	8.65	3.1		315.128	317.952	312.587		311.39		315.975	317.952	313.434		313.511	314.644	311.246		320.591	322.291	318.892		8.65	3.1	315.128	317.952	312.587
TTNO57	6	PC4	III	17	19	8.68	3.04		317.104	319.363	313.998		312.96		317.952	319.646	315.128		315.211	316.343	312.945		322.007	323.14	320.308		8.68	3.04	317.104	319.363	313.998
TTNO57	6	PC4	III	20	22	8.71	3.1		318.799	320.775	315.693		314.531		319.928	320.493	317.669		317.193	317.476	314.927		323.424	324.273	322.291		8.71	3.1	318.799	320.775	315.693
TTNO57	6	PC4	III	23	25	8.74	2.825		320.775	322.469	317.387		316.101		321.905	322.752	320.775		319.175	320.308	318.609		324.84	325.406	324.556		8.74	2.825	320.775	322.469	317.387
TTNO57	6	PC4	III	26	28	8.76	2.79		321.622	323.034	318.234		317.148		322.752	323.317	321.622		320.025	320.875	319.459		325.406	326.256	324.84		8.76	2.79	321.622	323.034	318.234
TTNO57	6	PC4	III	29	31	8.79	2.685		322.752	324.446	319.928		318.718		323.881	324.728	322.752		321.158	322.007	320.591		326.539	327.955	325.972		8.79	2.685	322.752	324.446	319.928
TTNO57	6	PC4	III	32	34	8.82	2.78		324.164	326.14	321.622		320.289		324.728	327.552	323.317		322.007	322.574	321.158		327.955	329.088	326.822		8.82	2.78	324.164	326.14	321.622
TTNO57	6	PC4	III	34	36	8.85	2.73		325.293	327.835	323.034		321.859		325.293	329.529	324.728		323.14	323.99	322.007		329.371	330.787	327.955		8.85	2.73	325.293	327.835	323.034
TTNO57	6	PC4	III	37.5	39.5	8.88	2.685		326.423	329.529	324.164		323.43		327.27	330.376	325.858		324.273	326.256	323.14		330.787	332.203	329.371		8.88	2.685	326.423	329.529	324.164
TTNO57	6	PC4	III	40	42	8.91	2.56		328.117	330.941	325.576		325		328.964	331.223	326.988		327.389	329.654	325.123		332.486	335.035	330.787		8.91	2.56	328.117	330.941	325.576
TTNO57	6	PC4	III	43	45	8.94	2.6		329.811	332.635	326.988		329.418		330.658	332.353	328.399		330.221	332.486	329.088		335.601	336.168	332.203		8.94	2.6	329.811	332.635	326.988
TTNO57	6	PC4	III	46	48	8.97	2.815		331.788	334.329	328.399		333.836		332.353	333.764	331.505		333.619	334.185	331.92		337.017	337.301	336.168		8.97	2.815	331.788	334.329	328.399
TTNO57	6	PC4	III	49	51	9	2.945		333.764	336.023	330.094		338.253		334.047	335.459	333.2		335.035	335.318	334.752		338.15	338.434	337.017		9	2.945	333.764	336.023	330.094
177	1090D	2	3	20.5	22.5	12.76	3.13		417	417.7	417		421.128		416.847	418.329	416		416	416.705	416		NaN	NaN	NaN		12.76	3.13	417	417.7	417
177	1090D	2	3	26	28	12.81	3.14		418.3	421	417.7		422.225		418.329	420.234	417.482		417.058	417.939	416.529		NaN	NaN	NaN		12.81	3.14	418.3	421	417.7
177	1090D	2	3	30.5	32.5	12.85	3.16		420	422.7	418.7		423.102		420.234	421.293	418.752		418.292	419.35	417.41		416	416	NaN		12.85	3.16	420	422.7	418.7
177	1090D	2	3	36	38	12.91	3.42		422.4	424.4	420.4		424.419		423.41	424.469	421.716		420.584	421.818	419.526		416.7	417	NaN		12.91	3.42	422.4	424.4	420.4
177	1090D	2	3	40.5	42.5	12.95	3.89		424	425.7	421.7		425.296		424.892	425.951	424.68		422.7	423.405	420.76		417.7	419.7	416		12.95	3.89	424	425.7	421.7
177	1090D	2	3	50.5	52.5	13.06	3.18		426.7	429.8	424		427.709		427.009	427.433	426.586		425.168	425.344	424.463		421.4	422.1	420		13.06	3.18	426.7	429.8	424
177	1090D	2	3	56	58	13.11	4.24		428.7	431.8	426.7		428.806		428.068	428.703	427.644		427.46	428.694	426.578		422.7	423.4	422.7		13.11	4.24	428.7	431.8	426.7
177	1090D	2	3	60.5	62.5	13.15	4.29		429.8	433.4	428.1		429.684		429.127	429.973	428.491		428.87	429.399	428.518		423.4	424.4	423.1		13.15	4.29	429.8	433.4	428.1
177	1090D	2	3	66	68	13.21	4.37		432.1	436.1	430.1		431		430.397	432.302	429.762		434.512	435.394	429.223		424.8	425.8	424.1		13.21	4.37	432.1	436.1	430.1
177	1090D	2	3	76	78	13.31	4.45		435.8	439.8	432.8		434.443		435.266	437.383	432.091		438.214	439.801	434.688		426.5	427.5	425.4		13.31	4.45	435.8	439.8	432.8
177	1090D	2	3	80.5	82.5	13.35	4.31		437.8	441.5	434.5		435.82		437.595	439.712	434.631		439.801	441.388	436.804		427.5	431.2	426.5		13.35	4.31	437.8	441.5	434.5
177	1090D	2	3	86	88	13.41	4.41		440.2	443.8	436.1		437.885		440.771	442.465	436.96		441.917	443.68	438.743		431.5	432.9	427.5		13.41	4.41	440.2	443.8	436.1
177	1090D	2	3	90.5	92.5	13.45	4.35		442.2	445.2	437.8		439.262		442.676	443.735	438.654		443.503	445.443	440.154		432.5	434.2	430.8		13.45	4.35	442.2	445.2	437.8
177	1090D	2	3	96	98	13.51	4.36		444.2	447.5	440.8		441.328		444.582	445.429	440.983		445.267	447.735	442.622		433.9	435.9	432.2		13.51	4.36	444.2	447.5	440.8
177	1090D	2	3	101	103	13.56	4.31		445.9	448.9	442.2		443.049		446.064	446.487	443.312		447.206	449.498	444.914		435.2	436.9	433.5		13.56	4.31	445.9	448.9	442.2
177	1090D	2	3	106	108	13.61	4.27		447.9	450.6	444.2		444.77		447.758	448.816	445.429		449.145	451.966	446.148		436.6	438.2	434.9		13.61	4.27	447.9	450.6	444.2
177	1090D	2	3	110.5	112.5	13.65	4.21		448.9	451.9	445.5		446.148		448.816	450.298	446.487		451.261	453.024	447.735		437.2	439.3	435.9		13.65	4.21	448.9	451.9	445.5
177	1090D	2	3	116	118	13.71	4.07		450.9	453.6	448.2		448.213		450.51	452.839	449.028		453.553	454.963	449.851		438.9	441.3	437.6		13.71	4.07	450.9	453.6	448.2
177	1090D	2	3	120.5	122.5	13.76	4.02		452.6	455.3	450.2		449.934		451.357	454.109	450.51		455.14	456.55	451.261		440.3	442.6	438.6		13.76	4.02	452.6	455.3	450.2
177	1090D	2	3	126	128	13.81	3.98		453.9	456.3	451.9		451.656		452.627	455.591	451.357		456.726	457.961	452.671		441.6	444.3	439.9		13.81	3.98	453.9	456.3	451.9
177	1090D	2	3	130.5	132.5	13.85	4.06		455.6	457.9	452.9		453.033		453.686	457.497	452.839		457.784	458.842	453.553		443	446	441.3		13.85	4.06	455.6	457.9	452.9
177	1090D	2	3	136	138	13.91	3.87		456.9	459.6	454.6		455.098		454.744	459.614	454.533		459.195	459.9	454.787		445	448	443		13.91	3.87	456.9	459.6	454.6
177	1090D	2	3	140.5	142.5	13.95	3.9		458.3	461	455.6		456.475		455.379	460.249	454.956		460.252	460.429	455.492		446.3	449.7	444.3		13.95	3.9	458.3	461	455.6
177	1090D	2	3	146	148	14.01	3.99		460	462.6	457.3		458.541		456.861	461.731	456.226		462.015	463.602	457.784		448.4	451.7	445.7		14.01	3.99	460	462.6	457.3
177	1090D	2	4	2	4	14.07	3.97		461.3	464	458.6		460.607		458.343	463.001	457.285		463.25	464.836	460.429		450.4	453.8	447.7		14.07	3.97	461.3	464	458.6
177	1090D	2	4	6	8	14.11	3.96		462.6	465	460		461.984		459.614	464.06	458.132		464.131	465.718	462.544		451.7	455.4	449		14.11	3.96	462.6	465	460
177	1090D	2	4	10.5	12.5	14.15	3.97		463.3	466	461		463.361		461.096	464.907	459.19		465.013	466.423	463.602		453.1	456.8	450.4		14.15	3.97	463.3	466	461
177	1090D	2	4	16	18	14.21	3.96		465.3	467.7	462.6		465.426		463.636	466.389	460.461		466.247	467.481	464.836		455.1	459.5	452.4		14.21	3.96	465.3	467.7	462.6
177	1090D	2	4	20.5	22.5	14.26	3.99		466.7	469	464		467.148		464.907	467.447	462.154		467.305	468.715	465.894		456.5	463.9	453.8		14.26	3.99	466.7	469	464
177	1090D	2	4	26	28	14.31	3.9		468	470.4	465.3		468.869		466.389	468.718	463.848		468.539	469.773	466.952		458.1	465.2	456.1		14.31	3.9	468	470.4	465.3
177	1090D	2	4	30.5	32.5	14.35	3.9		469.4	471.7	466.7		470.246		468.082	470.2	465.753		469.773	470.478	468.539		460.2	466.6	457.8		14.35	3.9	469.4	471.7	466.7
177	1090D	2	4	36	38	14.41	3.78		471	473	468.7		472.311		470.835	473.164	468.082		471.712	473.299	470.302		462.9	467.9	459.8		14.41	3.78	471	473	468.7
177	1090D	2	4	40.5	42.5	14.45	3.86		472	474.1	469.7		473.689		472.952	474.434	469.988		473.299	475.062	472.594		465.6	469.3	462.5		14.45	3.86	472	474.1	469.7
177	1090D	2	4	46	48	14.51	3.81		473.7	475.4	471.7		475.754		475.281	476.128	473.799		475.415	477.001	474.357		468.3	470.9	465.6		14.51	3.81	473.7	475.4	471.7
177	1090D	2	4	50.5	52.5	14.56	3.74		475.1	476.7	473		477.475		476.763	477.398	475.704		477.354	478.412	476.12		470.6	472.6	467.9		14.56	3.74	475.1	476.7	473
177	1090D	2	4	60.5	62.5	14.65	3.34		477.4	478.7	475.7		480.574		478.88	479.515	478.668		480.88	482.114	480.527		473.6	475.3	470.3		14.65	3.34	477.4	478.7	475.7
177	1090D	2	4	66	68	14.71	3.56		478.7	480.4	477.4		482.639		480.15	480.786	479.515		482.643	483.525	481.056		475.3	477.4	472.3		14.71	3.56	478.7	480.4	477.4
177	1090D	2	4	70.5	72.5	14.76	3.58		480.4	481.4	478.7		484.361		481.421	481.421	480.997		483.525	484.23	481.409		476.7	478.4	474		14.76	3.58	480.4	481.4	478.7
177	1090D	2	4	76	78	14.81	3.36		481.4	482.8	479.8		486.082		482.691	482.903	482.479		484.406	485.288	482.467		478.4	480.1	475.7		14.81	3.36	481.4	482.8	479.8
177	1090D	2	4	80.5	82.5	14.85	3.31		482.8	484.1	481.1		487.459		483.538	483.961	483.538		485.111	485.993	483.525		479.4	481.1	477		14.85	3.31	482.8	484.1	481.1
177	1090D	2	4	86	88	14.91	3.34		484.1	485.8	482.4		489.525		484.596	485.02	483.961		485.993	486.875	484.582		481.1	482.7	478.7		14.91	3.34	484.1	485.8	482.4
177	1090D	2	4	90.5	92.5	14.95	3.46		485.1	487.1	483.4		490.902		485.231	485.443	484.596		486.875	487.403	485.288		482.1	483.8	480.1		14.95	3.46	485.1	487.1	483.4
177	1090D	2	4	96	98	15.01	3.32		486.5	488.8	484.8		492.967		486.29	486.714	485.443		487.932	488.461	486.522		483.8	485.4	481.4		15.01	3.32	486.5	488.8	484.8
177	1090D	2	4	102	104	15.07	3.22		488.1	490.8	486.5		495.033		487.137	487.56	486.502		488.99	489.519	487.756		485.4	487.1	483.4		15.07	3.22	488.1	490.8	486.5
177	1090D	2	4	106	108	15.11	3.15		489.2	492.5	487.8		496.41		488.196	488.407	487.56		489.695	490.401	488.637		486.8	488.1	484.8		15.11	3.15	489.2	492.5	487.8
177	1090D	2	4	110.5	112.5	15.15	3.06		490.2	493.9	488.8		497.787		489.042	490.101	488.407		490.577	491.282	489.519		487.8	489.2	486.8		15.15	3.06	490.2	493.9	488.8
177	1090D	2	4	116	118	15.21	3.11		492.2	496.9	490.2		499.852		490.524	492.642	489.466		491.635	492.516	490.577		489.5	490.8	487.8		15.21	3.11	492.2	496.9	490.2
177	1090D	2	4	120.5	122.5	15.26	3.11		494.2	498.9	491.5		501.574		492.007	495.394	490.524		492.516	493.75	491.635		490.8	491.8	489.2		15.26	3.11	494.2	498.9	491.5
177	1090D	2	4	126	128	15.31	3.13		495.9	500.6	492.8		503.295		493.488	498.57	492.007		493.574	495.337	492.34		491.8	493.2	490.5		15.31	3.13	495.9	500.6	492.8
177	1090D	2	4	131	133	15.36	3.13		497.9	502.2	494.9		505.016		495.394	500.687	493.277		494.985	497.276	493.398		493.2	494.5	492.2		15.36	3.13	497.9	502.2	494.9
177	1090D	2	4	136	138	15.41	2.96		499.9	504.3	496.2		506.738		497.299	502.381	496.664		497.1	499.216	494.456		494.5	495.9	493.2		15.41	2.96	499.9	504.3	496.2
177	1090D	2	4	141	143	15.46	3.28		502.6	506.3	498.9		508.459		501.745	505.133	498.358		499.921	502.742	497.1		495.9	497.2	494.5		15.46	3.28	502.6	506.3	498.9
177	1090D	2	5	1	3	15.56	3.8		507.6	511.6	502.6		511.902		507.885	508.309	507.673		508.736	509.442	507.502		498.3	499.6	497.6		15.56	3.8	507.6	511.6	502.6
177	1090D	2	5	16	18	15.71	3.68		512.3	516.7	506.3		517.066		512.755	513.39	510.002		514.202	516.141	512.439		505.3	507.7	500.3		15.71	3.68	512.3	516.7	506.3
177	1090D	2	5	21	23	15.76	3.52		514.3	518.3	507.6		518.787		514.237	515.295	511.273		516.141	517.904	514.378		507.4	510.7	502		15.76	3.52	514.3	518.3	507.6
177	1090D	2	5	31	33	15.86	3.56		517.7	521.7	511.3		522.23		516.777	518.471	514.025		518.786	520.549	516.846		511.4	514.8	505.3		15.86	3.56	517.7	521.7	511.3
177	1090D	2	5	36	38	15.91	3.6		519.7	524.4	514		523.951		518.259	521.223	515.295		520.196	522.664	518.433		513.4	516.5	507		15.91	3.6	519.7	524.4	514
177	1090D	2	5	46	48	16.01	3.22		523	527.7	519		527.393		523.976	527.363	521.012		524.075	525.838	523.546		517.8	519.5	512.4		16.01	3.22	523	527.7	519
177	1090D	2	5	51	53	16.06	3.42		525.4	529.8	521		529.115		526.305	529.48	523.341		526.367	527.424	525.309		519.8	521.2	515.4		16.06	3.42	525.4	529.8	521
177	1090D	2	5	56	58	16.11	3.1		527.7	531.4	523		530.836		528.422	531.386	527.575		528.13	528.482	527.601		521.9	522.9	518.1		16.11	3.1	527.7	531.4	523
177	1090D	2	5	61	63	16.16	3.73		530.1	534.1	525.7		532.557		533.503	534.138	532.444		529.716	530.774	529.54		523.5	524.9	520.2		16.16	3.73	530.1	534.1	525.7
177	1090D	2	5	66	68	16.21	3.71		531.4	536.1	528.1		534.279		535.197	535.409	533.503		531.127	532.89	530.422		525.2	526.9	523.5		16.21	3.71	531.4	536.1	528.1
177	1090D	2	5	71	73	16.26	3.83		534.1	538.1	530.8		536		536.89	537.314	534.138		532.185	533.771	531.48		526.6	528.6	524.5		16.26	3.83	534.1	538.1	530.8
177	1090D	2	5	76	78	16.31	3.64		535.8	540.2	532.1		537.765		538.796	539.431	535.197		533.066	534.477	532.361		527.9	529.6	526.2		16.31	3.64	535.8	540.2	532.1
177	1090D	2	5	81	83	16.36	3.86		537.5	541.8	533.8		539.529		541.125	542.395	536.467		533.771	535.535	533.595		529.3	531	527.6		16.36	3.86	537.5	541.8	533.8
177	1090D	2	5	86	88	16.41	3.69		539.8	543.9	535.1		541.294		542.819	543.877	537.314		534.477	536.416	534.124		530.3	532.3	528.9		16.41	3.69	539.8	543.9	535.1
177	1090D	2	5	91	93	16.46	3.79		541.8	545.2	536.5		543.059		544.089	545.359	539.219		535.358	539.413	534.653		531.6	534.3	529.9		16.46	3.79	541.8	545.2	536.5
177	1090D	2	5	96	98	16.51	3.87		543.9	548.2	538.1		544.824		545.148	547.476	540.913		536.416	544.526	535.711		533.3	537	531.3		16.51	3.87	543.9	548.2	538.1
177	1090D	2	5	101	103	16.56	3.88		546.2	550.6	539.8		546.588		546.841	549.593	542.395		539.413	548.757	536.416		535.7	539.7	532.6		16.56	3.88	546.2	550.6	539.8
177	1090D	2	5	106	108	16.61	3.92		547.9	552.2	541.8		548.353		548.747	550.652	544.089		543.645	550.697	538.532		538	541.7	534.3		16.61	3.92	547.9	552.2	541.8
177	1090D	2	5	111	113	16.66	3.87		549.9	553.6	544.2		550.118		550.229	551.711	545.994		546.289	552.636	542.587		540.1	543.4	536		16.66	3.87	549.9	553.6	544.2
177	1090D	2	5	121	123	16.76	3.87		552.9	556.6	547.9		553.647		552.981	554.04	549.805		552.812	554.752	549.991		542.8	546.5	539.4		16.76	3.87	552.9	556.6	547.9
177	1090B	3	5	137	139	16.82	3.78		554.9	558.6	550.2		555.765		554.251	555.522	552.558		554.576	556.162	553.165		544.8	548.5	541.7		16.82	3.78	554.9	558.6	550.2
177	1090B	3	5	142	144	16.87	3.88		556.3	559.6	552.2		557.529		555.945	556.792	553.404		556.162	557.22	554.928		546.1	550.8	543.8		16.87	3.88	556.3	559.6	552.2
177	1090B	3	5	146	148	16.91	3.8		557.6	561	554.3		558.941		557.004	558.062	555.945		557.573	558.63	556.338		547.5	552.2	545.1		16.91	3.8	557.6	561	554.3
177	1090B	3	2	6	8	17.01	3.74		560.6	563.7	558.3		562.471		561.026	561.873	558.062		561.628	562.686	559.336		550.8	557.9	548.5		17.01	3.74	560.6	563.7	558.3
177	1090B	3	2	11	13	17.06	3.59		562.6	566	560.3		564.235		562.932	563.99	559.544		563.743	564.448	561.628		552.9	562.3	550.5		17.06	3.59	562.6	566	560.3
177	1090B	3	2	16	18	17.11	3.36		564.7	568	562		566		565.896	567.378	561.661		566.917	568.327	565.506		555.2	564	553.5		17.11	3.36	564.7	568	562
177	1090B	3	2	21	23	17.16	3.59		567.3	569.7	564		568.504		568.648	569.495	563.143		568.856	570.09	568.504		557.9	566.4	555.9		17.16	3.59	567.3	569.7	564
177	1090B	3	2	31	33	17.26	3.25		571	573.7	567.7		573.512		571.4	573.518	570.553		571.853	572.382	570.795		567	571.4	560.6		17.26	3.25	571	573.7	567.7
177	1090B	3	2	36	38	17.31	3.2		573.4	576.4	570.7		576.016		573.941	574.364	572.671		573.44	574.498	572.03		569.4	574.4	563.7		17.31	3.2	573.4	576.4	570.7
177	1090B	3	2	41	43	17.36	3.04		576.1	578.8	573.1		578.52		577.964	578.811	575.635		576.437	578.553	573.793		573.4	578.1	569		17.36	3.04	576.1	578.8	573.1
177	1090B	3	2	46	48	17.41	3.13		579.1	581.4	576.1		581.024		579.869	580.293	578.599		579.082	580.492	577.143		577.5	582.2	571.7		17.41	3.13	579.1	581.4	576.1
177	1090B	3	2	56	58	17.51	3.8		584.5	587.5	581.8		586.032		583.892	585.374	582.621		584.9	586.839	581.726		586.2	590.6	583.5		17.51	3.8	584.5	587.5	581.8
177	1090B	3	2	61	63	17.56	3.68		587.1	589.8	584.5		588.536		586.221	588.126	584.315		587.544	590.718	585.605		589.3	595	586.2		17.56	3.68	587.1	589.8	584.5
177	1090B	3	2	71	73	17.66	3.53		591.5	595.5	588.2		593.544		590.243	591.514	588.549		591.247	599.709	588.955		595.3	600.1	593.7		17.66	3.53	591.5	595.5	588.2
177	1090B	3	2	76	78	17.71	3.62		594.2	598.9	589.8		596.048		592.36	593.419	590.243		593.01	601.472	590.718		598.7	602.4	595.3		17.71	3.62	594.2	598.9	589.8
177	1090B	3	2	81	83	17.76	3.32		596.5	600.9	591.5		598.552		594.478	597.018	592.149		595.654	603.764	593.539		601.1	604.8	597.7		17.76	3.32	596.5	600.9	591.5
177	1090B	3	2	91	93	17.86	3.35		601.6	605.3	596.5		603.56		599.135	602.946	596.171		603.412	606.056	597.241		605.1	608.5	602.1		17.86	3.35	601.6	605.3	596.5
177	1090B	3	2	96	98	17.91	3.37		604.6	607.3	598.9		606.064		602.311	605.275	598.077		605.704	607.291	602.707		607.8	610.8	604.1		17.91	3.37	604.6	607.3	598.9
177	1090B	3	2	101	103	17.96	3.37		607.3	609	602.2		608.568		605.699	607.181	601.464		607.291	608.877	605.704		610.8	613.2	607.1		17.96	3.37	607.3	609	602.2
177	1090B	3	2	106	108	18.01	3.3		609.6	611	604.9		611.072		608.451	608.874	603.581		609.054	613.99	607.819		613.2	615.6	609.5		18.01	3.3	609.6	611	604.9
177	1090B	3	2	112	114	18.07	3.11		613.7	615	607.6		614.077		615.438	616.284	606.122		614.872	617.34	613.638		618.9	620.6	612.9		18.07	3.11	613.7	615	607.6
177	1090B	3	2	116	118	18.11	3.34		615	616.3	609		616.08		617.343	618.825	607.816		618.75	619.456	617.869		621	622	614.2		18.11	3.34	615	616.3	609
177	1090B	3	2	126	128	18.21	4.07		617.7	618.7	617		618.078		621.154	621.366	619.037		621.571	621.747	621.571		623.7	624.3	623.7		18.21	4.07	617.7	618.7	617
177	1090B	3	2	131	133	18.26	3.62		618.7	619.7	618		619.077		621.577	622.424	619.672		621.924	622.1	621.924		624.7	625.3	624.7		18.26	3.62	618.7	619.7	618
177	1090B	3	2	136	138	18.31	3.48		620	620.7	619		620.076		622.212	622.848	620.519		622.453	622.453	622.276		625.7	626.4	625.7		18.31	3.48	620	620.7	619
177	1090B	3	2	146	148	18.41	3.95		622	622.7	621.4		622.074		623.694	624.753	622.848		623.334	623.334	623.158		627	627.4	626.7		18.41	3.95	622	622.7	621.4
177	1090B	3	3	1	3	18.46	4.25		623.4	624.1	622.7		623.072		624.753	625.6	623.906		624.039	624.392	623.687		627.7	628.4	627.7		18.46	4.25	623.4	624.1	622.7
177	1090B	3	3	6	8	18.51	4.35		624.4	625.4	623.7		624.071		625.6	626.659	625.177		624.745	624.921	624.568		628.7	629.4	628.4		18.51	4.35	624.4	625.4	623.7
177	1090B	3	3	11	13	18.56	4.25		625.4	626.7	624.7		625.07		626.659	627.505	626.023		625.45	625.45	625.097		629.4	630.7	629.1		18.56	4.25	625.4	626.7	624.7
177	1090B	3	3	16	18	18.61	4.43		626.7	627.8	625.7		626.069		627.717	628.564	626.87		630.563	631.092	625.803		630.4	631.7	629.7		18.61	4.43	626.7	627.8	625.7
177	1090B	3	3	21	23	18.66	4.49		627.8	629.1	626.7		627.068		628.776	629.834	627.717		632.502	634.089	626.86		631.7	632.8	630.7		18.66	4.49	627.8	629.1	626.7
177	1090B	3	3	26	28	18.71	4.43		629.1	630.4	627.8		628.067		629.834	630.893	628.776		634.089	635.499	630.563		632.8	633.8	631.7		18.71	4.43	629.1	630.4	627.8
177	1090B	3	3	36	38	18.81	4.49		630.4	632.1	629.1		630.065		631.74	632.798	630.893		636.205	637.262	634.089		634.1	635.1	632.8		18.81	4.49	630.4	632.1	629.1
177	1090B	3	3	41	43	18.86	4.47		631.8	633.5	630.1		631.064		632.798	633.645	631.952		637.262	638.32	636.205		635.1	636.1	633.8		18.86	4.47	631.8	633.5	630.1
177	1090B	3	3	46	48	18.91	4.26		632.8	634.5	631.1		632.063		633.857	634.704	633.01		638.32	639.378	637.615		636.1	637.1	634.8		18.91	4.26	632.8	634.5	631.1
177	1090B	3	3	51	53	18.96	4.43		633.8	635.5	632.1		633.062		635.127	635.974	634.28		639.378	640.612	638.32		637.1	638.2	635.8		18.96	4.43	633.8	635.5	632.1
177	1090B	3	3	56	58	19.01	4.4		635.1	636.5	633.1		634.061		636.186	636.821	635.551		640.612	642.023	639.378		638.2	639.2	636.8		19.01	4.4	635.1	636.5	633.1
177	1090B	3	3	61	63	19.06	4.29		636.1	637.8	634.5		635.059		637.456	638.938	637.033		641.846	642.904	640.436		638.8	640.2	637.8		19.06	4.29	636.1	637.8	634.5
177	1090B	3	3	66	68	19.11	4.35		637.1	638.8	635.5		636.058		639.15	640.632	637.668		642.728	643.786	641.494		639.8	641.2	638.5		19.11	4.35	637.1	638.8	635.5
177	1090B	3	3	71	73	19.16	4.23		638.2	639.8	636.5		637.057		641.055	641.902	638.515		643.786	644.491	642.552		640.9	642.2	639.5		19.16	4.23	638.2	639.8	636.5
177	1090B	3	3	76	78	19.21	4.29		639.2	640.8	637.5		638.056		641.691	642.961	639.573		644.491	645.725	642.904		641.5	642.9	640.2		19.21	4.29	639.2	640.8	637.5
177	1090B	3	3	81	83	19.26	4.28		640.2	641.8	638.5		639.055		642.749	644.443	641.055		645.725	646.783	643.786		642.5	643.9	641.2		19.26	4.28	640.2	641.8	638.5
177	1090B	3	3	86	88	19.31	4.17		641.2	642.9	639.5		640.054		643.596	645.501	641.902		646.606	647.841	644.314		643.2	644.6	641.9		19.31	4.17	641.2	642.9	639.5
177	1090B	3	3	91	93	19.36	4.32		642.2	643.9	640.5		641.053		644.654	646.56	642.961		647.488	648.722	645.196		644.2	645.6	642.9		19.36	4.32	642.2	643.9	640.5
177	1090B	3	3	101	103	19.46	4.28		643.5	645.2	641.8		643.051		646.56	648.254	644.866		648.722	649.956	646.783		645.2	646.6	643.9		19.46	4.28	643.5	645.2	641.8
177	1090B	3	3	106	108	19.51	4.28		644.5	646.2	642.9		644.05		647.83	649.101	646.348		649.427	650.838	647.664		646.2	647.6	644.9		19.51	4.28	644.5	646.2	642.9
177	1090B	3	3	111	113	19.56	4.31		645.5	647.2	643.9		645.049		648.889	650.159	647.407		650.309	651.719	648.546		646.9	648.3	645.6		19.56	4.31	645.5	647.2	643.9
177	1090B	3	3	116	118	19.61	4.3		646.5	648.2	644.9		646.048		649.947	651.218	648.677		651.543	652.601	649.604		647.9	649.3	646.6		19.61	4.3	646.5	648.2	644.9
177	1090B	3	3	121	123	19.66	4.3		647.6	649.2	645.9		647.046		651.006	652.065	649.736		652.072	653.13	650.485		648.6	650	647.3		19.66	4.3	647.6	649.2	645.9
177	1090B	3	3	126	128	19.71	4.29		648.6	650.2	646.9		648.045		651.853	652.7	651.006		653.13	654.011	651.719		649.6	651	648.3		19.71	4.29	648.6	650.2	646.9
177	1090B	3	3	131	133	19.76	4.27		649.6	651.2	647.9		649.044		652.7	653.547	651.853		653.835	654.716	652.601		650.6	652	648.9		19.76	4.27	649.6	651.2	647.9
177	1090B	3	3	136	138	19.81	4.24		650.6	652.3	648.9		650.043		653.758	654.394	652.912		654.716	655.422	653.835		651.3	652.6	650		19.81	4.24	650.6	652.3	648.9
177	1090B	3	3	141	143	19.86	4.24		651.6	653.6	650.2		651.042		654.817	654.817	653.97		655.598	656.48	654.716		652.3	653.3	651		19.86	4.24	651.6	653.6	650.2
177	1090B	3	3	146	148	19.91	4.08		652.6	654.6	651.2		652.041		655.876	657.146	655.24		656.656	657.537	655.598		653.3	654.3	652		19.91	4.08	652.6	654.6	651.2
177	1090B	3	4	1	3	19.96	4.09		653.9	655.6	652.3		653.04		657.146	658.628	656.299		657.89	658.771	656.656		654	655.3	652.6		19.96	4.09	653.9	655.6	652.3
177	1090B	3	4	6	8	20.01	4.11		654.6	656.3	653.3		654.039		658.416	659.687	657.569		658.771	659.829	657.714		655	656.4	653.7		20.01	4.11	654.6	656.3	653.3
177	1090B	3	4	11	13	20.06	4.15		655.9	657.6	654.3		655.038		659.687	660.957	659.051		660.006	660.887	658.771		655.7	657.4	654.7		20.06	4.15	655.9	657.6	654.3
177	1090B	3	4	16	18	20.11	4.17		656.9	658.6	655.3		656.037		660.957	662.015	660.11		660.887	661.769	659.829		656.7	658	655.3		20.11	4.17	656.9	658.6	655.3
177	1090B	3	4	21	23	20.16	4.17		658	659.6	656.3		657.036		662.015	662.862	661.168		662.121	663.003	660.887		657.4	659.1	656.4		20.16	4.17	658	659.6	656.3
177	1090B	3	4	26	28	20.21	4.12		659	660.6	657.6		658.035		663.074	663.921	662.015		663.003	663.884	661.945		658.4	659.7	657		20.21	4.12	659	660.6	657.6
177	1090B	3	4	31	33	20.26	4.08		660	661.6	658.6		659.034		664.133	664.979	663.074		664.237	664.942	662.827		659.4	660.7	658		20.26	4.08	660	661.6	658.6
177	1090B	3	4	36	38	20.31	4.01		661	662.7	660		660.032		665.403	666.038	664.133		665.119	665.824	663.884		660.1	661.8	659.1		20.31	4.01	661	662.7	660
177	1090B	3	4	41	43	20.36	3.76		662	663.7	661.3		661.031		666.673	666.885	665.191		666.176	666.353	665.647		661.1	662.4	659.7		20.36	3.76	662	663.7	661.3
177	1090B	3	4	46	48	20.41	4.21		663	664.7	662		662.03		667.732	668.155	666.038		667.939	668.468	667.234		662.1	663.4	660.7		20.41	4.21	663	664.7	662
177	1090B	3	4	51	53	20.46	3.79		664	665.7	662.7		663.029		669.002	669.214	666.461		669.526	669.879	668.645		662.8	664.4	661.8		20.46	3.79	664	665.7	662.7
177	1090B	3	4	56	58	20.51	3.96		665	666.7	663.7		664.028		669.637	670.061	667.308		670.231	670.76	669.35		663.8	665.5	662.4		20.51	3.96	665	666.7	663.7
177	1090B	3	4	61	63	20.56	4.01		666	667.7	664.7		665.027		670.272	670.908	668.155		670.76	671.289	669.879		664.8	666.1	663.4		20.56	4.01	666	667.7	664.7
177	1090B	3	4	66	68	20.61	3.97		667	668.7	665.3		666.026		670.908	671.543	669.426		671.465	671.994	670.584		665.5	667.1	664.4		20.61	3.97	667	668.7	665.3
177	1090B	3	4	71	73	20.66	3.99		667.7	669.7	666.3		667.025		671.331	671.966	670.061		671.994	672.523	670.937		666.5	667.8	665.1		20.66	3.99	667.7	669.7	666.3
177	1090B	3	4	76	78	20.71	3.88		669	670.7	667.4		668.024		671.966	672.389	670.696		672.7	673.405	671.465		667.5	668.8	666.1		20.71	3.88	669	670.7	667.4
177	1090B	3	4	81	83	20.76	4.09		669.7	671.7	668.4		669.023		672.389	672.813	671.543		673.229	673.757	672.347		668.5	669.5	667.1		20.76	4.09	669.7	671.7	668.4
177	1090B	3	4	86	88	20.81	3.99		670.7	672.7	669		670.022		672.813	673.448	672.389		673.934	674.286	673.229		669.5	670.5	668.5		20.81	3.99	670.7	672.7	669
177	1090B	3	4	91	93	20.86	3.92		671.7	673.7	670		671.021		673.448	674.083	672.813		674.639	674.991	673.934		670.5	671.5	669.5		20.86	3.92	671.7	673.7	670
177	1090B	3	4	96	98	20.91	3.76		672.7	674.7	671		672.019		674.083	674.507	673.448		674.991	675.52	674.639		671.5	672.2	670.5		20.91	3.76	672.7	674.7	671
177	1090B	3	4	101	103	20.96	3.88		673.7	675.7	672.1		673.018		674.718	675.142	674.083		675.697	676.226	675.168		672.2	672.9	671.2		20.96	3.88	673.7	675.7	672.1
177	1090B	3	4	106	108	21.01	3.79		674.7	677.1	673.1		674.017		675.142	675.565	674.718		676.049	676.755	675.52		673.2	673.9	672.2		21.01	3.79	674.7	677.1	673.1
177	1090B	3	4	111	113	21.06	3.97		675.4	678.1	674.1		675.016		675.777	675.989	675.354		676.755	677.284	676.226		673.9	674.9	672.9		21.06	3.97	675.4	678.1	674.1
177	1090B	3	4	116	118	21.11	3.85		676.4	679.1	675.1		676.015		676.2	676.412	675.989		677.107	677.812	676.578		674.9	675.6	673.9		21.11	3.85	676.4	679.1	675.1
177	1090B	3	4	121	123	21.16	3.98		677.4	680.1	676.1		677.014		676.836	676.836	676.412		677.46	678.341	677.107		675.9	676.2	674.9		21.16	3.98	677.4	680.1	676.1
177	1090B	3	4	126	128	21.21	3.76		678.4	681.4	677.1		678.013		677.259	677.682	677.047		678.341	679.047	677.812		676.6	677.3	675.9		21.21	3.76	678.4	681.4	677.1
177	1090B	3	4	131	133	21.26	3.7		679.8	682.5	678.1		679.012		677.894	678.529	677.471		678.87	679.576	678.165		677.3	678.6	676.6		21.26	3.7	679.8	682.5	678.1
177	1090B	3	4	136	138	21.31	3.63		680.4	683.5	678.8		680.011		678.318	679.164	677.894		679.576	680.104	678.87		678.3	679.3	677.6		21.31	3.63	680.4	683.5	678.8
177	1090B	3	4	131	143	21.36	3.72		681.8	684.5	680.1		681.01		678.953	680.011	678.529		679.928	680.633	679.223		679.3	680.3	678.6		21.36	3.72	681.8	684.5	680.1
177	1090B	3	4	146	148	21.41	3.6		682.8	685.5	681.1		682.009		679.588	680.435	679.164		680.633	681.338	679.928		680.3	681	679.3		21.41	3.6	682.8	685.5	681.1
177	1090B	3	5	1	3	21.46	3.74		683.8	686.5	682.1		683.008		680.223	681.282	679.8		680.986	681.867	680.281		681	682	680		21.46	3.74	683.8	686.5	682.1
177	1090B	3	5	6	8	21.51	3.62		684.8	687.5	683.5		684.006		681.07	681.705	680.223		681.691	682.573	680.986		682	682.7	681		21.51	3.62	684.8	687.5	683.5
177	1090B	3	5	11	13	21.56	3.7		685.8	688.5	684.5		685.005		681.705	682.34	681.07		682.044	683.102	681.515		683	683.7	682.3		21.56	3.7	685.8	688.5	684.5
177	1090B	3	5	16	18	21.61	4.13		686.8	689.5	685.5		686.004		682.34	682.975	681.705		682.396	683.454	682.22		684	684.3	683.3		21.61	4.13	686.8	689.5	685.5
177	1090B	3	5	21	23	21.66	3.79		687.8	690.5	686.8		687.003		682.975	683.822	682.552		683.454	685.57	682.925		685	685.3	684.3		21.66	3.79	687.8	690.5	686.8
177	1090B	3	5	31	33	21.76	4.07		690.5	693.2	689.2		689.001		684.881	684.881	684.034		686.099	686.451	685.57		686.4	686.4	685.3		21.76	4.07	690.5	693.2	689.2
177	1090B	3	5	36	38	21.81	3.24		691.9	694.2	690.2		690		688.903	690.385	687.21		689.801	690.859	689.625		688.7	694.5	687.7		21.81	3.24	691.9	694.2	690.2
177	1090B	3	5	41	43	21.86	3.26		693.2	695.2	691.5		690.927		690.809	692.503	688.48		691.388	692.446	690.683		693.1	697.5	689.1		21.86	3.26	693.2	695.2	691.5
177	1090B	3	5	46	48	21.91	3.04		694.5	696.9	692.9		691.854		692.079	693.773	689.75		692.975	694.032	691.917		696.5	700.2	693.8		21.91	3.04	694.5	696.9	692.9
177	1090B	3	5	51	53	21.96	3.19		695.9	697.9	693.9		692.78		693.561	694.832	691.021		694.561	695.443	693.151		698.8	702.2	695.8		21.96	3.19	695.9	697.9	693.9
177	1090B	3	5	56	58	22.01	3.05		697.2	699.6	695.2		693.707		694.832	698.007	692.079		695.795	697.382	694.209		701.2	703.9	698.8		22.01	3.05	697.2	699.6	695.2
177	1090B	3	5	66	68	22.11	3.12		699.6	702.3	697.2		695.561		699.066	700.124	694.196		698.264	700.027	696.148		704.6	706.6	701.9		22.11	3.12	699.6	702.3	697.2
177	1090B	3	5	71	73	22.16	2.99		701.2	703.6	698.6		696.488		700.336	700.971	695.89		699.498	701.437	697.558		705.9	708.3	703.6		22.16	2.99	701.2	703.6	698.6
177	1090D	3	2	89	91	22.36	3.46		705.9	709	702.6		700.195		705.417	708.593	703.935		707.079	708.666	705.845		711.3	713.3	709.3		22.36	3.46	705.9	709	702.6
177	1090D	3	2	94	96	22.41	3.38		707.6	710.6	704.6		701.122		706.688	710.075	705.206		709.195	710.605	707.784		713	714.7	710.6		22.41	3.38	707.6	710.6	704.6
177	1090D	3	2	99	101	22.46	3.41		709	712.3	706.3		702.049		707.958	711.346	706.264		710.958	712.015	709.547		714.3	716	712.3		22.46	3.41	709	712.3	706.3
177	1090D	3	2	104	106	22.51	3.44		711.7	714.3	708.3		702.976		709.017	712.616	707.323		712.544	713.25	711.134		716.4	717.4	714.3		22.51	3.44	711.7	714.3	708.3
177	1090D	3	2	109	111	22.56	3.7		713.7	716.7	710.3		703.902		710.075	713.886	708.381		713.779	714.484	713.602		719.1	720.7	717		22.56	3.7	713.7	716.7	710.3
177	1090D	3	2	114	116	22.61	3.8		716.4	720.7	712.3		704.829		711.134	714.945	709.863		715.013	715.365	714.66		721.4	723.4	718.7		22.61	3.8	716.4	720.7	712.3
177	1090D	3	2	119	121	22.66	4.01		719	723.7	714.3		705.756		711.769	720.449	711.134		716.423	720.478	715.718		724.5	726.5	722.1		22.66	4.01	719	723.7	714.3
177	1090D	3	2	129	131	22.76	3.76		724.1	728.1	717.4		707.61		712.616	726.801	711.981		725.238	727.354	723.652		729.2	731.5	725.8		22.76	3.76	724.1	728.1	717.4
177	1090D	3	2	139	141	22.86	3.7		728.1	732.1	721		709.463		713.674	736.328	713.039		729.999	735.111	727.001		734.6	737.9	728.5		22.86	3.7	728.1	732.1	721
177	1090D	3	2	144	146	22.91	3.85		730.1	734.8	723.4		710.39		714.098	738.657	713.463		733.877	737.051	729.822		737.3	740.3	730.2		22.91	3.85	730.1	734.8	723.4
177	1090D	3	3	0	2	22.97	3.78		732.1	736.8	725.4		711.502		714.521	740.774	714.098		736.346	738.814	732.643		739.6	742	733.9		22.97	3.78	732.1	736.8	725.4
177	1090D	3	3	4	6	23.01	3.69		733.8	738.5	727.1		712.244		714.945	742.256	714.733		738.638	740.929	733.701		740.6	743	736.3		23.01	3.69	733.8	738.5	727.1
177	1090D	3	3	14	16	23.11	3.79		736.8	741.9	729.8		714.098		716.638	745.22	715.792		742.516	743.398	735.817		743	746	741.3		23.11	3.79	736.8	741.9	729.8
177	1090D	3	3	19	21	23.16	4.01		738.5	743.5	731.5		715.024		717.909	747.549	716.638		744.279	747.629	737.051		744.7	747.4	743.7		23.16	4.01	738.5	743.5	731.5
177	1090D	3	3	29	31	23.26	3.86		741.2	745.5	734.1		716.878		719.814	749.666	719.179		752.213	753.976	742.869		747	750.4	745.7		23.26	3.86	741.2	745.5	734.1
177	1090D	3	3	39	41	23.36	3.87		743.9	747.9	736.8		718.732		721.72	751.572	720.449		754.505	755.915	752.389		750.1	752.8	748.7		23.36	3.87	743.9	747.9	736.8
177	1090D	3	3	44	46	23.41	3.89		745.5	749.2	738.5		719.659		722.778	752.63	721.508		755.739	756.621	753.623		751.4	754.1	750.1		23.41	3.89	745.5	749.2	738.5
177	1090D	3	3	49	51	23.46	3.85		746.9	750.6	740.2		720.585		723.625	753.689	723.202		756.797	757.678	754.329		753.1	755.1	751.4		23.46	3.85	746.9	750.6	740.2
177	1090D	3	3	54	56	23.51	3.85		748.2	751.9	742.2		721.512		724.26	754.747	723.625		757.678	758.56	755.563		754.5	756.5	752.8		23.51	3.85	748.2	751.9	742.2
177	1090D	3	3	59	61	23.56	3.94		749.9	753.3	744.2		722.439		724.895	756.018	724.26		758.736	759.442	756.444		755.8	757.8	754.1		23.56	3.94	749.9	753.3	744.2
177	1090D	3	3	64	66	23.61	3.85		751.3	754.3	746.6		723.366		725.954	757.076	724.895		759.442	760.147	757.149		757.2	758.8	755.5		23.61	3.85	751.3	754.3	746.6
177	1090D	3	3	69	71	23.66	3.77		752.6	755.6	748.9		724.293		726.801	758.135	725.742		760.323	761.205	758.207		758.5	760.5	757.2		23.66	3.77	752.6	755.6	748.9
177	1090D	3	3	74	76	23.71	3.73		753.9	756.6	750.9		725.22		727.859	758.77	726.589		761.205	762.086	759.442		759.8	761.5	758.2		23.71	3.73	753.9	756.6	750.9
177	1090D	3	3	79	81	23.76	3.71		755.6	758	752.9		726.146		729.341	759.829	727.648		762.086	762.968	760.323		761.2	762.9	759.5		23.76	3.71	755.6	758	752.9
177	1090D	3	3	84	86	23.81	3.67		757	759	755.3		727.073		730.612	760.887	728.918		763.144	764.202	761.205		762.5	763.9	761.2		23.81	3.67	757	759	755.3
177	1090D	3	3	89	91	23.86	3.54		758	760	757		728		732.941	761.734	730.4		764.202	765.612	762.262		763.6	765.2	762.2		23.86	3.54	758	760	757
177	1090D	3	3	94	96	23.91	3.53		759.3	761.3	758.3		730.495		735.269	762.793	731.882		765.612	766.141	763.496		764.9	766.3	763.6		23.91	3.53	759.3	761.3	758.3
177	1090D	3	3	99	101	23.96	3.56		760.3	762.3	759.3		732.991		737.598	763.851	733.999		766.141	766.494	765.612		765.9	767.3	764.9		23.96	3.56	760.3	762.3	759.3
177	1090D	3	3	104	106	24.01	3.35		761.7	763.3	760.6		735.486		739.292	765.122	739.08		766.67	767.023	766.67		766.9	768.3	766.3		24.01	3.35	761.7	763.3	760.6
177	1090D	3	3	109	111	24.06	3.13		762.7	764	761.7		737.982		740.351	765.968	739.716		767.023	767.375	767.023		767.9	769.3	767.6		24.06	3.13	762.7	764	761.7
177	1090D	3	3	114	116	24.11	3.29		764	765	762.7		740.477		740.986	766.604	740.351		767.375	767.904	767.375		769	770	768.3		24.11	3.29	764	765	762.7
177	1090D	3	3	119	121	24.16	3.47		764.7	766	763.7		742.973		742.891	767.451	741.621		768.257	768.609	767.904		770	771	769		24.16	3.47	764.7	766	763.7
177	1090D	3	3	129	131	24.26	3.82		766	767.4	765		747.964		754.747	768.509	751.572		769.314	769.491	769.138		771	772.3	770		24.26	3.82	766	767.4	765
177	1090D	3	3	134	136	24.31	3.42		767	768.4	765.7		750.459		761.099	769.144	757.076		770.372	770.372	770.02		772	773	770.6		24.31	3.42	767	768.4	765.7
177	1090D	3	3	139	141	24.36	3.42		768	769	766.7		752.955		762.369	769.568	761.099		771.606	771.959	771.606		772.7	774	771.3		24.36	3.42	768	769	766.7
177	1090D	3	3	144	146	24.41	3.6		769.4	770	767.7		755.45		763.428	770.203	762.369		772.664	772.841	772.664		773.3	774.7	772.3		24.41	3.6	769.4	770	767.7
177	1090D	3	4	0	2	24.47	3.91		770.4	770.7	768.7		758.445		764.91	770.838	764.486		773.37	773.37	773.193		774.3	775.4	773.3		24.47	3.91	770.4	770.7	768.7
177	1090D	3	4	4	6	24.51	3.31		771.1	771.7	769.4		760.441		769.144	772.32	767.027		774.251	774.427	773.898		775.4	776.7	774		24.51	3.31	771.1	771.7	769.4
177	1090D	3	4	9	11	24.56	3.07		772.4	773.4	771.1		762.936		773.379	774.014	773.167		775.485	776.014	774.956		776.7	777.7	775.4		24.56	3.07	772.4	773.4	771.1
177	1090D	3	4	14	16	24.61	3.28		773.4	774.4	772.1		765.432		774.649	774.861	774.014		776.543	777.601	776.543		777.7	778.4	776.4		24.61	3.28	773.4	774.4	772.1
177	1090D	3	4	19	21	24.66	3.05		774.7	775.8	773.4		767.927		775.919	776.554	775.284		777.424	778.659	776.896		778.7	779.7	777.7		24.66	3.05	774.7	775.8	773.4
177	1090D	3	4	24	26	24.71	3.05		775.8	776.8	774.4		770.423		776.978	777.825	776.343		778.659	779.716	777.777		779.7	780.8	778.7		24.71	3.05	775.8	776.8	774.4
177	1090D	3	4	29	31	24.76	2.93		776.8	778.1	775.8		772.918		778.036	779.095	777.613		779.54	780.422	778.659		780.4	781.4	779.7		24.76	2.93	776.8	778.1	775.8
177	1090D	3	4	34	36	24.81	2.83		778.1	779.4	777.1		775.414		779.095	779.73	779.095		780.422	781.832	779.54		781.4	782.4	780.4		24.81	2.83	778.1	779.4	777.1
177	1090D	3	4	39	41	24.86	2.91		779.4	780.4	778.1		777.909		779.942	780.789	779.518		781.656	783.066	780.069		782.4	783.8	781.4		24.86	2.91	779.4	780.4	778.1
177	1090D	3	4	44	46	24.91	2.9		780.4	781.8	779.1		780.405		780.789	781.636	780.365		782.714	784.124	780.951		783.4	784.8	782.4		24.91	2.9	780.4	781.8	779.1
177	1090D	3	4	49	51	24.96	3.1		781.8	782.8	780.4		782.9		781.847	782.482	781.212		783.595	784.829	781.832		784.8	786.1	783.8		24.96	3.1	781.8	782.8	780.4
177	1090D	3	4	54	56	25.01	2.98		782.8	784.1	781.5		783.875		782.694	783.329	782.059		784.3	785.535	782.714		785.8	787.2	784.8		25.01	2.98	782.8	784.1	781.5
177	1090D	3	4	59	61	25.06	2.99		784.1	785.5	782.8		784.85		783.753	784.176	782.906		785.358	786.592	783.419		787.2	788.5	786.1		25.06	2.99	784.1	785.5	782.8
177	1090D	3	4	64	66	25.11	2.86		785.1	786.5	783.8		785.825		784.811	784.811	784.176		786.592	787.298	784.477		788.2	789.2	787.5		25.11	2.86	785.1	786.5	783.8
177	1090D	3	4	69	71	25.16	3.32		786.5	787.8	785.1		786.8		786.293	787.352	785.447		787.65	788.003	785.535		789.5	790.5	788.8		25.16	3.32	786.5	787.8	785.1
177	1090D	3	4	74	76	25.21	2.99		787.8	788.8	786.5		787.775		787.352	788.199	786.717		788.179	788.355	786.769		790.5	791.2	790.2		25.21	2.99	787.8	788.8	786.5
177	1090D	3	4	79	81	25.26	3.27		788.8	790.2	787.5		788.75		788.622	788.834	787.775		789.061	789.413	788.179		791.9	792.2	790.9		25.26	3.27	788.8	790.2	787.5
177	1090D	3	4	89	91	25.36	3.75		791.2	792.2	789.5		790.7		790.528	791.375	789.681		791	791	790.824		793.6	793.9	792.5		25.36	3.75	791.2	792.2	789.5
177	1090D	3	4	94	96	25.41	3.85		792.2	793.5	790.9		791.675		791.798	792.857	791.163						794.6	794.6	793.6		25.41	3.85	792.2	793.5	790.9
177	1090D	3	4	99	101	25.46	3.86		793.5	794.9	791.9		792.65		792.645	793.915	792.01						795.2	795.6	794.6		25.46	3.86	793.5	794.9	791.9
177	1090D	3	4	109	111	25.56	3.94		795.2	796.9	793.5		794.6		795.186	796.456	793.703						796.3	797.3	795.6		25.56	3.94	795.2	796.9	793.5
177	1090D	3	4	114	116	25.61	3.89		796.6	798.2	794.9		795.575		796.244	797.938	794.762						797.3	798.6	796.3		25.61	3.89	796.6	798.2	794.9
177	1090D	3	4	119	121	25.66	4.06		797.6	799.6	795.9		796.55		797.514	798.996	795.821						798.6	800	797.3		25.66	4.06	797.6	799.6	795.9
177	1090D	3	4	124	126	25.71	4		798.9	800.9	797.2		797.525		798.996	800.267	797.091						799.6	801	798.6		25.71	4	798.9	800.9	797.2
177	1090D	3	4	129	131	25.76	4.01		799.9	801.9	798.6		798.5		800.267	801.114	798.361						800.6	802	799.6		25.76	4.01	799.9	801.9	798.6
177	1090D	3	4	134	136	25.81	4.07		801.3	803.3	799.6		799.475		801.749	802.384	799.631						801.7	803	801		25.81	4.07	801.3	803.3	799.6
177	1090D	3	4	139	141	25.86	3.98		802.3	804.3	800.6		800.45		803.019	803.654	800.902						802.7	804	801.7		25.86	3.98	802.3	804.3	800.6
177	1090D	3	4	144	146	25.91	3.9		803.6	805.3	801.9		801.425		803.866	804.501	803.019						803.7	805	802.7		25.91	3.9	803.6	805.3	801.9
177	1090D	3	5	0	2	25.97	3.97		804.6	806.6	802.9		802.595		805.136	805.771	804.078						804.7	806	803.7		25.97	3.97	804.6	806.6	802.9
177	1090D	3	5	4	6	26.01	3.94		805.6	807.6	803.9		803.375		805.771	806.618	804.924						805.7	807	804.7		26.01	3.94	805.6	807.6	803.9
177	1090D	3	5	9	11	26.06	3.91		806.6	808.6	804.9		804.35		806.618	807.465	805.983						806.7	807.7	805.7		26.06	3.91	806.6	808.6	804.9
177	1090D	3	5	14	16	26.11	3.78		807.6	809.6	806		805.325		807.465	808.1	807.042						807.7	808.7	806.7		26.11	3.78	807.6	809.6	806
177	1090D	3	5	19	21	26.16	3.88		809	811	807.3		806.3		808.1	808.947	807.677						808.4	809.4	807.4		26.16	3.88	809	811	807.3
177	1090D	3	5	24	26	26.21	3.86		810	812	808.3		807.275		808.947	809.794	808.312						809.4	810.8	808.4		26.21	3.86	810	812	808.3
177	1090D	3	5	29	31	26.26	3.77		811	813.3	809.3		808.25		809.794	810.429	809.159						810.4	811.4	809.1		26.26	3.77	811	813.3	809.3
177	1090D	3	5	34	36	26.31	3.78		812.3	815	810.3		809.225		810.429	811.064	809.794						811.1	812.4	810.1		26.31	3.78	812.3	815	810.3
177	1090D	3	5	39	41	26.36	3.83		813.3	816	811.3		810.2		811.276	811.911	810.641						812.1	813.5	811.1		26.36	3.83	813.3	816	811.3
177	1090D	3	5	44	46	26.41	3.75		814.7	818.4	812.3		811.175		812.123	812.546	811.488						813.1	814.5	812.1		26.41	3.75	814.7	818.4	812.3
177	1090D	3	5	49	51	26.46	3.83		815.7	824.1	813.7		812.15		812.758	812.97	812.335						814.1	815.5	812.8		26.46	3.83	815.7	824.1	813.7
177	1090D	3	5	54	56	26.51	3.65		817	825.8	815		813.125		813.605	814.24	813.181						815.1	816.5	813.8		26.51	3.65	817	825.8	815
177	1090D	3	5	59	61	26.56	3.66		819.4	827.8	816.4		814.1		814.663	815.51	813.817						816.1	817.5	814.8		26.56	3.66	819.4	827.8	816.4
177	1090D	3	5	64	66	26.61	3.57		822.7	829.1	817.7		815.075		815.51	816.569	814.663						817.5	819.9	815.8		26.61	3.57	822.7	829.1	817.7
177	1090D	3	5	69	71	26.66	3.65		825.1	830.8	819		816.05		816.357	816.992	815.299						819.2	825.6	817.2		26.66	3.65	825.1	830.8	819
177	1090D	3	5	74	76	26.71	3.58		826.8	832.1	820.7		817.025		816.992	820.803	816.357						821.2	826.6	818.2		26.71	3.58	826.8	832.1	820.7
177	1090D	3	5	79	81	26.76	3.52		827.8	833.5	822.1		818		819.956	824.614	817.628						825.9	827.9	820.2		26.76	3.52	827.8	833.5	822.1
177	1090D	3	5	84	86	26.81	3.53		829.4	835.5	823.7		819.94		823.344	828.002	819.533						827.3	829	825.6		26.81	3.53	829.4	835.5	823.7
177	1090D	3	5	89	91	26.86	3.64		830.8	837.2	825.1		821.881		825.249	830.542	825.038						829	830.3	827.6		26.86	3.64	830.8	837.2	825.1
177	1090D	3	5	94	96	26.91	3.77		832.1	838.8	826.8		823.821		826.943	831.812	826.096						830.3	831.3	829.6		26.91	3.77	832.1	838.8	826.8
177	1090D	3	5	104	106	27.01	3.34		834.1	842.9	830.1		827.701		833.506	834.777	828.637						832.7	833.7	831.7		27.01	3.34	834.1	842.9	830.1
177	1090D	3	5	109	111	27.06	3.14		835.8	845.2	831.8		829.642		835.2	836.047	833.294						834	835	832.7		27.06	3.14	835.8	845.2	831.8
177	1090E	3	2	69	71	27.1	3.18		836.5	846.6	833.1		831.194		836.259	836.894	835.2						835	836	833.7		27.1	3.18	836.5	846.6	833.1
177	1090E	3	2	84	86	27.25	3.1		840.2	850.6	836.2		837.015		839.011	839.646	836.47						838.1	838.4	837		27.25	3.1	840.2	850.6	836.2
177	1090E	3	2	89	91	27.3	3.51		841.5	851.9	837.5		838.955		839.646	840.705	837.529						839.4	840.1	838.7		27.3	3.51	841.5	851.9	837.5
177	1090E	3	2	94	96	27.35	3.38		842.9	853.3	839.2		840.896		840.705	841.763	838.587						841.1	842.1	840.8		27.35	3.38	842.9	853.3	839.2
177	1090E	3	2	99	101	27.4	3.34		844.2	854.6	840.9		842.836		841.763	842.822	839.858						842.4	843.8	841.8		27.4	3.34	844.2	854.6	840.9
177	1090E	3	2	104	106	27.45	3.23		845.9	856	843.2		844.776		842.822	844.516	841.552						844.1	846.1	842.8		27.45	3.23	845.9	856	843.2
177	1090E	3	2	114	116	27.55	2.95		848.9	858	847.2		848.657		845.574	850.232	845.151						847.2	851.5	845.8		27.55	2.95	848.9	858	847.2
177	1090E	3	2	119	121	27.6	3.05		850.6	859.3	848.6		850.597		846.844	852.137	845.786						848.8	853.9	847.2		27.6	3.05	850.6	859.3	848.6
177	1090E	3	2	124	126	27.65	3.09		852.3	860.7	849.6		852.537		848.538	854.255	847.268						850.9	855.9	848.8		27.65	3.09	852.3	860.7	849.6
177	1090E	3	2	134	136	27.75	3.18		856	863	852.3		856.418		852.773	861.453	851.079						855.3	859.6	853.2		27.75	3.18	856	863	852.3
177	1090E	3	3	9	11	28	3		864	866.7	859.3		866.119		863.782	864.84	860.818						864.4	865.4	861.3		28	3	864	866.7	859.3
177	1090E	3	3	14	16	28.05	3.72		866	868.4	862		868.06		865.899	867.169	865.052						867.1	867.4	866.7		28.05	3.72	866	868.4	862
177	1090E	3	3	19	21	28.1	3.88		867.7	870.4	865		870		867.169	867.593	867.169						870.1	874.5	868.4		28.1	3.88	867.7	870.4	865
177	1090E	3	3	24	26	28.15	3.94		869	872.1	866.7		872.118		867.9	868.2	867.9						874.1	878.8	870.4		28.15	3.94	869	872.1	866.7
177	1090E	3	3	29	31	28.2	3.7		870.7	874.4	868		874.236		868.9	868.9	868.7						879.5	880.9	873.8		28.2	3.7	870.7	874.4	868
177	1090E	3	3	34	36	28.25	3.95		872.1	876.8	869		876.355		869.7	870.2	869.2						881.2	882.6	876.8		28.25	3.95	872.1	876.8	869
177	1090E	3	3	39	41	28.3	3.75		873.7	878.8	870.4		878.473		870.9	870.9	870.4						882.2	884.2	879.5		28.3	3.75	873.7	878.8	870.4
177	1090E	3	3	44	46	28.35	3.99		875.4	880.5	871.7		880.591		872.5	873.2	871.7						883.6	885.6	881.5		28.35	3.99	875.4	880.5	871.7
177	1090E	3	3	49	51	28.4	4.16		876.8	882.1	872.7		882.709		874	875	872.7						884.9	886.6	882.9		28.4	4.16	876.8	882.1	872.7
177	1090E	3	3	64	66	28.55	4.02		880.8	886.5	876.4		889.064		878	878.8	877						888.3	889.6	886.3		28.55	4.02	880.8	886.5	876.4
177	1090E	3	3	69	71	28.6	4.15		882.5	888.2	878.1		891.182		879.8	880.8	879.1						889.6	891.3	887.6		28.6	4.15	882.5	888.2	878.1
177	1090E	3	3	74	76	28.65	4.02		884.1	889.5	879.8		893.3		881.6	882.9	880.3						890.6	892.3	889		28.65	4.02	884.1	889.5	879.8
177	1090E	3	3	79	81	28.7	3.94		885.8	890.9	881.8		895.419		883.1	884.6	881.6						892	894	890.6		28.7	3.94	885.8	890.9	881.8
177	1090E	3	3	84	86	28.75	3.88		887.5	892.5	883.5		897.537		884.6	886.4	883.1						893.3	895.4	891.7		28.75	3.88	887.5	892.5	883.5
177	1090E	3	3	89	91	28.8	3.96		889.2	893.9	885.2		899.655		886.4	888.2	884.4						894.7	896.4	893		28.8	3.96	889.2	893.9	885.2
177	1090E	3	3	94	96	28.85	3.98		890.9	895.6	886.8		901.773		887.7	890	885.9						896	897.7	894.4		28.85	3.98	890.9	895.6	886.8
177	1090E	3	3	99	101	28.9	3.99		892.9	896.9	889.2		903.892		889.7	892.5	887.7						897.4	899.1	895.7		28.9	3.99	892.9	896.9	889.2
177	1090E	3	3	109	111	29	4.01		896.6	900.9	892.9		908.128		894.5	896.8	893.2						900.4	902.1	898.7		29	4.01	896.6	900.9	892.9
177	1090E	3	3	114	116	29.05	3.77		898.9	903.6	894.9		910.246		899.3	900.9	897.1						902.4	904.5	900.8		29.05	3.77	898.9	903.6	894.9
177	1090E	3	3	119	121	29.1	3.45		901.9	907.3	897.6		912.365		907.4	909	903.1						905.1	910.5	903.8		29.1	3.45	901.9	907.3	897.6
177	1090E	3	3	129	131	29.2	3.64		908	912.7	901.6		916.601		912.3	913.5	911.2						910.2	920	907.8		29.2	3.64	908	912.7	901.6
177	1090E	3	3	134	136	29.25	3.49		911	915	903.9		918.719		914	916.1	913						914.2	922	910.5		29.25	3.49	911	915	903.9
177	1090E	3	3	144	146	29.35	3.95		915.7	919.4	908.3		922.956		917.6	919.9	917.1						924	927.1	923		29.35	3.95	915.7	919.4	908.3
177	1090E	3	4	9	11	29.5	4.02		920.4	924.8	915.7		929.31		921.1	922.9	919.1						928.4	929.8	926.7		29.5	4.02	920.4	924.8	915.7
177	1090E	3	4	24	26	29.65	4.04		924.4	928.8	920.7		935.665		924.4	924.9	922.1						931.4	933.1	929.4		29.65	4.04	924.4	928.8	920.7
177	1090E	3	4	34	36	29.75	3.55		928.4	932.5	925.4		939.901		930.5	932.5	929.2						935.5	936.8	933.5		29.75	3.55	928.4	932.5	925.4
177	1090E	3	4	39	41	29.8	3.36		930.5	933.8	927.4		942.02		933.8	934.8	933						937.5	938.5	935.1		29.8	3.36	930.5	933.8	927.4
177	1090E	3	4	44	46	29.85	3.44		932.8	936.2	929.5		944.138		935.8	936.8	935.1						939.2	940.9	937.2		29.85	3.44	932.8	936.2	929.5
177	1090E	3	4	49	51	29.9	3.36		934.8	938.2	931.5		946.256		937.9	938.9	937.1						940.5	942.2	938.5		29.9	3.36	934.8	938.2	931.5
177	1090E	3	4	54	56	29.95	3.28		936.8	940.5	933.8		948.374		939.6	940.6	938.9						942.2	944.2	940.5		29.95	3.28	936.8	940.5	933.8
177	1090E	3	4	59	61	30	3.08		939.2	943.2	935.8		950.493		941.2	941.4	941.2						943.9	945.9	941.9		30	3.08	939.2	943.2	935.8
177	1090E	3	4	64	66	30.05	3.11		940.9	945.6	937.5		952.611		942.2	942.4	941.9						944.9	947.3	943.2		30.05	3.11	940.9	945.6	937.5
177	1090D	4	1	69	71	30.08	3.26		942.5	946.9	938.8		953.882		942.9	942.9	942.4						945.9	948.3	944.2		30.08	3.26	942.5	946.9	938.8
177	1090D	4	1	74	76	30.13	3.02		945.2	949.3	940.5		956		944.5	945	943.7						947.3	949.6	945.3		30.13	3.02	945.2	949.3	940.5
177	1090D	4	1	89	91	30.28	3.26		953.3	955	945.2		958.87		946.7	947	946						950.3	955.4	948.3		30.28	3.26	953.3	955	945.2
177	1090D	4	1	104	106	30.43	3.38		958	959	956.3		961.739		957.1	957.6	957.1						962.8	963.8	962.8		30.43	3.38	958	959	956.3
177	1090D	4	1	109	111	30.48	3.61		959.3	960.3	958.3		962.696		958.1	958.9	957.6						964.1	964.5	963.8		30.48	3.61	959.3	960.3	958.3
177	1090D	4	1	114	116	30.53	3.42		960.7	961.7	959.3		963.652		959.4	959.7	958.6						965.1	965.5	964.5		30.53	3.42	960.7	961.7	959.3
177	1090D	4	1	124	126	30.63	3.21		962.3	962.7	961		965.565		960.9	960.9	960.4						966.5	967.2	965.8		30.63	3.21	962.3	962.7	961
177	1090D	4	1	129	131	30.68	3.68		963.7	965	962.3		966.522		962.4	963	961.7						967.8	968.5	967.5		30.68	3.68	963.7	965	962.3
177	1090D	4	1	135	137	30.74	3.97		965.4	966.7	964		967.67		964.2	965	963.7						968.9	969.9	968.2		30.74	3.97	965.4	966.7	964
177	1090D	4	1	139	141	30.78	3.67		966.4	967.7	965		968.435		965.5	966.5	965.2						970.2	970.9	969.2		30.78	3.67	966.4	967.7	965
177	1090D	4	2	0	2	30.89	3.67		969.1	969.7	968		970.539		968	968.8	967						971.6	972.6	970.9		30.89	3.67	969.1	969.7	968
177	1090D	4	2	4	6	30.93	3.67		970.1	970.7	969.1		971.304		969.3	970.1	968.5						972.9	973.6	972.2		30.93	3.67	970.1	970.7	969.1
177	1090D	4	2	9	11	30.98	3.28		971.4	972.4	971.1		972.261		971.1	971.3	971.1						973.9	974.6	973.6		30.98	3.28	971.4	972.4	971.1
177	1090D	4	2	14	16	31.03	3.23		972.7	973.4	971.7		973.217		972.1	972.3	971.8						975.3	975.9	974.3		31.03	3.23	972.7	973.4	971.7
177	1090D	4	2	19	21	31.08	3.6		974.1	974.8	973.1		974.174		972.8	972.8	972.3						976.3	977.3	975.3		31.08	3.6	974.1	974.8	973.1
177	1090D	4	2	24	26	31.13	3.34		975.1	976.1	974.1		975.13		973.9	974.6	973.3						977.6	978.6	976.6		31.13	3.34	975.1	976.1	974.1
177	1090D	4	2	29	31	31.18	3.34		976.4	977.4	975.1		976.087		974.9	976.1	974.4						979	980	977.6		31.18	3.34	976.4	977.4	975.1
177	1090D	4	2	34	36	31.23	3.3		977.4	979.1	976.4		977.043		976.4	976.9	975.4						980	981.3	978.6		31.23	3.3	977.4	979.1	976.4
177	1090D	4	2	39	41	31.28	3.11		978.8	980.5	977.4		978		977.9	978.7	976.9						981.3	982.7	980		31.28	3.11	978.8	980.5	977.4
177	1090D	4	2	44	46	31.33	3.33		980.1	981.8	978.8		979.815		979.2	980.2	978.2						982.3	984	981.3		31.33	3.33	980.1	981.8	978.8
177	1090D	4	2	49	51	31.38	3.33		981.1	983.5	980.1		981.631		980.2	981.7	979.2						983.7	985.4	982.3		31.38	3.33	981.1	983.5	980.1
177	1090D	4	2	54	56	31.43	3.18		982.8	984.8	981.5		983.446		981	983	980.4						985	986.7	983.4		31.43	3.18	982.8	984.8	981.5
177	1090D	4	2	69	71	31.58	3.53		988.5	991.2	985.5		988.892		989.1	991.6	984						987.4	989.4	985.7		31.58	3.53	988.5	991.2	985.5
177	1090D	4	2	84	86	31.73	3.32		995.2	997.6	991.2		994.338		995.4	997.4	993.1						990.1	991.8	988.7		31.73	3.32	995.2	997.6	991.2
177	1090D	4	2	89	91	31.78	3.24		997.2	1000.3	993.2		996.154		997.7	998.9	995.4						991.4	992.8	990.1		31.78	3.24	997.2	1000.3	993.2
177	1090D	4	2	94	96	31.83	3.34		1000.6	1002.9	995.6		997.969		1000.5	1001	998.2						992.5	994.8	991.4		31.83	3.34	1000.6	1002.9	995.6
177	1090D	4	2	99	101	31.88	3.8		1004.3	1007	997.2		999.785		1005.8	1008.6	1003						994.5	995.8	993.5		31.88	3.8	1004.3	1007	997.2
177	1090D	4	2	104	106	31.93	3.44		1007.6	1010.7	998.9		1001.6		1012.6	1014.2	1005.8						996.2	998.2	995.2		31.93	3.44	1007.6	1010.7	998.9
177	1090D	4	2	109	111	31.98	3.23		1010	1013	1000.6		1003.42		1015.2	1016.2	1009.1						998.2	1002.6	996.8		31.98	3.23	1010	1013	1000.6
177	1090D	4	2	124	126	32.13	3.13		1014	1016.7	1009.3		1008.86		1017.7	1018.5	1011.1						1003.9	1009.3	1001.2		32.13	3.13	1014	1016.7	1009.3
177	1090D	4	2	129	131	32.18	3.49		1015.4	1018	1011.3		1010.68		1019.2	1019.5	1012.4						1006.6	1013	1003.2		32.18	3.49	1015.4	1018	1011.3
177	1090D	4	2	134	136	32.23	3.31		1016.7	1019.4	1013		1012.49		1019.7	1020	1013.7						1009.3	1015.4	1004.6		32.23	3.31	1016.7	1019.4	1013
177	1090D	4	2	139	141	32.28	3.43		1018	1020.4	1014.4		1014.31		1020.7	1020.7	1014.7						1014.7	1017.4	1006.3		32.28	3.43	1018	1020.4	1014.4
177	1090D	4	2	144	146	32.33	3.14		1019.4	1021.7	1015.7		1016.12		1021.5	1021.8	1016.2						1017.7	1019.4	1008		32.33	3.14	1019.4	1021.7	1015.7
177	1090D	4	3	0	2	32.39	3.31		1020.7	1023.4	1017.4		1018.3		1022.3	1022.5	1017.7						1019.8	1021.4	1010.3		32.39	3.31	1020.7	1023.4	1017.4
177	1090D	4	3	14	16	32.53	3.2		1024.4	1026.8	1020.7		1023.38		1023.8	1024	1020.2						1023.5	1026.2	1018.7		32.53	3.2	1024.4	1026.8	1020.7
177	1090D	4	3	19	21	32.58	3.08		1025.8	1028.1	1022.1		1025.2		1024.8	1024.8	1021.8						1024.8	1027.9	1021.4		32.58	3.08	1025.8	1028.1	1022.1
177	1090D	4	3	24	26	32.63	3.24		1027.1	1029.1	1023.8		1027.02		1026.3	1027.1	1023.3						1026.5	1029.2	1024.1		32.63	3.24	1027.1	1029.1	1023.8
177	1090D	4	3	29	31	32.68	3.1		1028.5	1030.5	1025.1		1028.83		1027.6	1028.4	1024.6						1028.5	1030.5	1026.5		32.68	3.1	1028.5	1030.5	1025.1
177	1090D	4	3	34	36	32.73	3.33		1029.8	1031.5	1027.4		1030.65		1028.9	1029.9	1026.3						1029.9	1031.9	1028.5		32.73	3.33	1029.8	1031.5	1027.4
177	1090D	4	3	39	41	32.78	3.18		1031.5	1032.8	1029.5		1032.46		1030.6	1030.9	1028.4						1032.2	1033.2	1030.5		32.78	3.18	1031.5	1032.8	1029.5
177	1090D	4	3	44	46	32.83	3.79		1033.5	1035.8	1031.5		1034.28		1033.7	1035.2	1033.2						1034.9	1037.6	1033.6		32.83	3.79	1033.5	1035.8	1031.5
177	1090D	4	3	49	51	32.88	3.81		1035.8	1039.2	1033.2		1036.09		1036.5	1039.3	1035.5						1038	1040.3	1035.6		32.88	3.81	1035.8	1039.2	1033.2
177	1090D	4	3	59	61	32.98	3.67		1039.9	1043.6	1035.5		1039.72		1041	1042.8	1039.3						1042	1044.4	1038.6		32.98	3.67	1039.9	1043.6	1035.5
177	1090D	4	3	64	66	33.03	3.78		1041.5	1045.6	1036.5		1041.54		1042.8	1046.4	1040.8						1044	1046.4	1040.7		33.03	3.78	1041.5	1045.6	1036.5
177	1090D	4	3	69	71	33.08	3.81		1043.9	1047.6	1038.5		1043.35		1044.3	1048.4	1043.1						1045.7	1048.1	1042.7		33.08	3.81	1043.9	1047.6	1038.5
177	1090D	4	3	74	76	33.13	3.68		1045.9	1049.6	1040.2		1045.17		1045.8	1050.2	1045.1						1047.4	1049.8	1044.7		33.13	3.68	1045.9	1049.6	1040.2
177	1090D	4	3	79	81	33.18	3.74		1047.6	1050.9	1042.2		1046.98		1047.6	1051.7	1046.4						1049.1	1051.8	1046.7		33.18	3.74	1047.6	1050.9	1042.2
177	1090D	4	3	84	86	33.23	3.79		1049.3	1052.6	1044.2		1048.8		1048.9	1052.9	1047.6						1050.4	1053.1	1048.1		33.23	3.79	1049.3	1052.6	1044.2
177	1090D	4	3	89	91	33.28	3.66		1050.9	1053.6	1046.2		1050.09		1051.2	1054.2	1049.6						1052.1	1054.5	1050.1		33.28	3.66	1050.9	1053.6	1046.2
177	1090D	4	3	94	96	33.33	3.67		1052.3	1055	1048.6		1051.38		1054	1055.5	1051.9						1053.5	1055.5	1051.4		33.33	3.67	1052.3	1055	1048.6
177	1090D	4	3	99	101	33.38	3.41		1054	1056.6	1051.3		1052.67		1055.7	1057	1055.2						1055.2	1056.8	1053.5		33.38	3.41	1054	1056.6	1051.3
177	1090D	4	3	104	106	33.43	3.62		1055	1058	1053		1053.96		1057.5	1058.5	1056.7						1056.5	1058.2	1055.2		33.43	3.62	1055	1058	1053
177	1090D	4	3	109	111	33.48	3.43		1057	1059.7	1055		1055.24		1059.3	1060	1059						1057.9	1059.2	1056.5		33.48	3.43	1057	1059.7	1055
177	1090D	4	3	114	116	33.53	3.47		1058.3	1061	1056.6		1056.53		1060.3	1061.3	1059.5						1059.2	1060.2	1057.5		33.53	3.47	1058.3	1061	1056.6
177	1090D	4	3	119	121	33.58	3.43		1059.7	1062.3	1057.6		1057.82		1061.3	1062.6	1061.1						1060.2	1061.2	1058.9		33.58	3.43	1059.7	1062.3	1057.6
177	1090D	4	3	124	126	33.63	3.23		1061.3	1064	1059.3		1059.11		1062.3	1064.1	1061.8						1061.9	1063.2	1059.9		33.63	3.23	1061.3	1064	1059.3
177	1090D	4	3	129	131	33.68	3.4		1062.3	1065.4	1060.7		1060.4		1062.8	1064.9	1062.6						1063.6	1065.3	1061.2		33.68	3.4	1062.3	1065.4	1060.7
177	1090D	4	3	134	136	33.73	3.04		1064	1066.7	1062		1061.69		1064.9	1066.9	1063.6						1065.3	1067	1062.2		33.73	3.04	1064	1066.7	1062
177	1090D	4	4	19	21	34.08	2.87		1071.7	1075.1	1068.1		1070.71		1070.7	1073.7	1068.9						1072.7	1074.4	1069		34.08	2.87	1071.7	1075.1	1068.1
177	1090D	4	4	24	26	34.13	2.74		1073.8	1077.1	1070.1		1072		1072.2	1075	1070.9						1074	1075.7	1071.3		34.13	2.74	1073.8	1077.1	1070.1
177	1090D	4	4	29	31	34.18	2.88		1075.4	1080.5	1072.4		1074.14		1074	1076.8	1073.2						1076.1	1077.1	1074.4		34.18	2.88	1075.4	1080.5	1072.4
177	1090D	4	4	34	36	34.23	3.24		1078.1	1084.5	1075.1		1076.29		1076	1082.3	1075.2						1077.7	1078.8	1076.4		34.23	3.24	1078.1	1084.5	1075.1
177	1090D	4	4	39	41	34.28	2.88		1080.8	1087.9	1077.1		1078.43		1077.8	1083.9	1076.3						1079.8	1080.8	1078.4		34.28	2.88	1080.8	1087.9	1077.1
177	1090D	4	4	44	46	34.33	3.04		1083.8	1090.2	1078.8		1080.57		1080.8	1084.9	1078						1081.8	1083.5	1079.8		34.33	3.04	1083.8	1090.2	1078.8
177	1090D	4	4	69	71	34.58	3.85		1099.6	1101.3	1095.2		1091.29		1097.6	1098.8	1097						1100	1101.7	1098.6		34.58	3.85	1099.6	1101.3	1095.2
177	1090D	4	4	74	76	34.63	3.56		1102.3	1103.6	1097.9		1093.43		1099.8	1100.8	1099.1						1103	1105.4	1101.7		34.63	3.56	1102.3	1103.6	1097.9
177	1090D	4	4	79	81	34.68	3.57		1104	1105	1101.3		1095.57		1101.6	1102.4	1100.8						1105.7	1106.7	1102.7		34.68	3.57	1104	1105	1101.3
177	1090D	4	4	84	86	34.73	3.08		1105.3	1106.6	1105.3		1097.71		1103.1	1103.6	1103.1						1107.7	1108.4	1104		34.73	3.08	1105.3	1106.6	1105.3
177	1090D	4	4	89	91	34.78	3.32		1106.6	1108	1106		1099.86		1104.1	1105.2	1103.9						1109.1	1109.4	1105.4		34.78	3.32	1106.6	1108	1106
177	1090D	4	4	94	96	34.83	3.53		1108	1109	1107		1102		1104.9	1106.2	1104.4						1110.1	1110.4	1106.7		34.83	3.53	1108	1109	1107
177	1090D	4	4	99	101	34.88	3.15		1109.3	1110.7	1108		1104.14		1106.7	1107.4	1105.7						1111.1	1111.8	1108.1		34.88	3.15	1109.3	1110.7	1108
177	1090D	4	4	104	106	34.93	2.97		1110.3	1112	1109.3		1106.29		1108.2	1109	1107.2						1112.1	1112.8	1109.4		34.93	2.97	1110.3	1112	1109.3
177	1090D	4	4	109	111	34.98	3.22		1111.7	1113.7	1110.7		1108.43		1109.5	1110.5	1108.5						1113.5	1114.5	1111.1		34.98	3.22	1111.7	1113.7	1110.7
177	1090D	4	4	114	116	35.03	3.21		1113	1115.7	1112		1110.57		1110.7	1111.7	1110						1114.8	1115.8	1112.5		35.03	3.21	1113	1115.7	1112
177	1090D	4	4	119	121	35.08	3.22		1114.7	1120.1	1113.4		1112.71		1112.5	1112.8	1111.5						1115.8	1116.8	1113.5		35.08	3.22	1114.7	1120.1	1113.4
177	1090D	4	4	124	126	35.13	3.61		1117.4	1124.4	1115		1114.86		1113.8	1114.8	1113						1117.5	1117.9	1114.5		35.13	3.61	1117.4	1124.4	1115
177	1090D	4	4	129	131	35.18	3.5		1120.4	1131.1	1116.4		1117		1115.6	1116.8	1114.3						1118.2	1118.9	1115.8		35.18	3.5	1120.4	1131.1	1116.4
177	1090D	4	4	134	136	35.23	3.48		1124.1	1132.5	1117.7		1119.14		1117.3	1119.4	1116.1						1118.9	1119.5	1117.5		35.23	3.48	1124.1	1132.5	1117.7
177	1090D	4	4	139	141	35.28	3.1		1131.5	1134.8	1119.1		1121.29		1119.4	1120.1	1119.1						1119.9	1120.2	1118.9		35.28	3.1	1131.5	1134.8	1119.1
177	1090D	4	4	144	146	35.33	3.17		1133.5	1138.5	1120.4		1123.43		1120.9	1120.9	1120.1						1121.2	1121.2	1119.9		35.33	3.17	1133.5	1138.5	1120.4
177	1090D	4	5	0	2	35.39	3.79		1136.2	1140.9	1123.1		1126		1128.5	1130.8	1122.6						1126.6	1129.3	1122.2		35.39	3.79	1136.2	1140.9	1123.1
177	1090D	4	5	4	6	35.43	3.62		1138.5	1144.9	1125.8		1128.84		1131.8	1134.6	1124.2						1129	1132.4	1123.9		35.43	3.62	1138.5	1144.9	1125.8
177	1090D	4	5	29	31	35.68	3.31		1153	1172.4	1139.9		1146.61		1145.7	1147	1142.4						1140.1	1145.5	1137.7		35.68	3.31	1153	1172.4	1139.9
177	1090D	4	5	34	36	35.73	3.4		1156.3	1174.1	1141.9		1150.16		1148.5	1150.5	1145.5						1142.8	1147.5	1139.8		35.73	3.4	1156.3	1174.1	1141.9
177	1090D	4	5	39	41	35.78	3.28		1160.7	1175.8	1144.6		1153.71		1152.6	1156.6	1149.5						1145.5	1149.9	1141.8		35.78	3.28	1160.7	1175.8	1144.6
177	1090D	4	5	44	46	35.83	3.43		1167.1	1176.8	1147.3		1157.27		1156.6	1164.5	1155.9						1147.5	1151.9	1143.5		35.83	3.43	1167.1	1176.8	1147.3
177	1090D	4	5	49	51	35.88	3.13		1170.1	1178.8	1150.6		1160.82		1164.5	1170.6	1162.4						1149.9	1155.3	1146.2		35.88	3.13	1170.1	1178.8	1150.6
177	1090D	4	5	54	56	35.93	3.49		1174.4	1180.5	1154		1164.37		1173.1	1173.9	1169.8						1151.9	1158.3	1148.2		35.93	3.49	1174.4	1180.5	1154
177	1090D	4	5	59	61	35.98	3.46		1176.8	1183.2	1156.6		1167.93		1175.9	1176.9	1173.9						1158	1165.7	1150.9		35.98	3.46	1176.8	1183.2	1156.6
177	1090D	4	5	64	66	36.03	3.27		1181.1	1184.8	1162.7		1171.48		1178.7	1178.9	1176.6						1165.7	1172.1	1152.9		36.03	3.27	1181.1	1184.8	1162.7
177	1090D	4	5	69	71	36.08	3.29		1183.2	1186.9	1167.4		1175.03		1181.7	1183	1181.2						1172.1	1175.8	1157.3		36.08	3.29	1183.2	1186.9	1167.4
177	1090D	4	5	74	76	36.13	3.21		1184.8	1188.9	1171.8		1178.59		1185.3	1186.5	1183.5						1177.2	1180.9	1161.7		36.13	3.21	1184.8	1188.9	1171.8
177	1090D	4	5	79	81	36.18	3.18		1187.9	1190.9	1176.1		1182.14		1187.8	1188.8	1186						1181.6	1184.9	1165.7		36.18	3.18	1187.9	1190.9	1176.1
177	1090D	4	5	84	86	36.23	3.56		1190.2	1192.9	1179.5		1185.69		1190.8	1192.4	1189.1						1186.6	1188.3	1172.5		36.23	3.56	1190.2	1192.9	1179.5
177	1090D	4	5	94	96	36.33	3.68		1194.2	1198.6	1191.6		1192.8		1195.6	1196.9	1193.4						1191	1192.4	1187.3		36.33	3.68	1194.2	1198.6	1191.6
177	1090D	4	5	99	101	36.38	3.88		1196.9	1203.3	1194.6		1197.19		1198.2	1200.2	1195.9						1193.4	1196.7	1190.7		36.38	3.88	1196.9	1203.3	1194.6
177	1090D	4	5	109	111	36.48	3.78		1202.6	1208.3	1198.6		1205.97		1203	1204.8	1199.7						1198.1	1202.1	1194.7		36.48	3.78	1202.6	1208.3	1198.6
177	1090D	4	5	114	116	36.53	3.76		1206	1210.7	1202		1210.36		1205.5	1207.8	1202						1201.1	1205.2	1198.1		36.53	3.76	1206	1210.7	1202
177	1090D	4	5	119	121	36.58	3.99		1208.7	1215	1206		1214.75		1208.3	1210.1	1203.8						1203.5	1207.5	1200.8		36.58	3.99	1208.7	1215	1206
177	1090D	4	5	124	126	36.63	3.5		1212.4	1217.1	1210.7		1219.14		1211.9	1214.9	1206.5						1208.5	1211.6	1205.5		36.63	3.5	1212.4	1217.1	1210.7
177	1090D	4	5	129	131	36.68	3.47		1216.4	1220.1	1213.4		1223.53		1215.9	1220.2	1211.6						1211.6	1216.3	1208.9		36.68	3.47	1216.4	1220.1	1213.4
177	1090D	4	5	134	136	36.73	3.54		1219.4	1222.4	1216.4		1227.92		1220.5	1222.8	1213.9						1217.6	1219.3	1215.6		36.73	3.54	1219.4	1222.4	1216.4
177	1090D	4	5	139	141	36.78	3.38		1222.4	1226.5	1219.7		1232.32		1224.8	1226.8	1219.5						1222.4	1227.1	1220.3		36.78	3.38	1222.4	1226.5	1219.7
177	1090D	4	5	144	146	36.83	3.42		1225.4	1232.8	1223.8		1236.71		1233.4	1234.9	1224.5						1228.1	1230.5	1226.7		36.83	3.42	1225.4	1232.8	1223.8
177	1090D	4	6	0	2	36.89	3.33		1232.8	1240.2	1231.2		1241.97		1243.1	1243.8	1234.2						1236.2	1239.9	1235.5		36.89	3.33	1232.8	1240.2	1231.2
177	1090D	4	6	4	6	36.93	3.22		1239.2	1244.2	1237.2		1245.49		1244.3	1244.8	1241						1241.2	1245.3	1239.9		36.93	3.22	1239.2	1244.2	1237.2
177	1090E	4	3	12	14	36.97	4.03		1242.2	1247.6	1241.2		1249		1245.6	1246.3	1245.1						1247.6	1249.3	1245.6		36.97	4.03	1242.2	1247.6	1241.2
177	1090E	4	3	22	24	37.07	3.9		1247.6	1250.6	1244.6		1255.31		1247.6	1248.6	1247.1						1250	1251.7	1248		37.07	3.9	1247.6	1250.6	1244.6
177	1090E	4	3	27	29	37.12	3.65		1249.9	1252.3	1246.3		1258.46		1249.1	1249.9	1249.1						1251.4	1253	1249.3		37.12	3.65	1249.9	1252.3	1246.3
177	1090E	4	3	32	34	37.17	3.88		1252	1254	1247.9		1261.62		1250.1	1250.9	1249.9						1252.7	1254	1250.3		37.17	3.88	1252	1254	1247.9
177	1090E	4	3	37	39	37.22	3.93		1253.6	1256.3	1249.6		1264.77		1250.9	1252.4	1250.7						1254	1255.4	1252		37.22	3.93	1253.6	1256.3	1249.6
177	1090E	4	3	42	44	37.27	3.91		1255.7	1258.7	1252.6		1267.92		1252.7	1253.9	1251.9						1255.4	1257.4	1253.7		37.27	3.91	1255.7	1258.7	1252.6
177	1090E	4	3	47	49	37.32	3.87		1258.7	1260.7	1254.6		1271.08		1254.7	1255	1253.7						1257.1	1260.5	1256.7		37.32	3.87	1258.7	1260.7	1254.6
177	1090E	4	3	52	54	37.37	3.46		1262.4	1266.7	1258		1274.23		1258.3	1262.8	1256.2						1261.5	1265.8	1258.4		37.37	3.46	1262.4	1266.7	1258
177	1090E	4	3	57	59	37.42	3.52		1266.1	1270.8	1261.4		1277.38		1263.8	1268.4	1261						1265.5	1270.2	1260.1		37.42	3.52	1266.1	1270.8	1261.4
177	1090E	4	3	62	64	37.47	3.19		1269.4	1275.5	1264		1280.54		1269.9	1272.2	1265.6						1271.2	1275	1262.1		37.47	3.19	1269.4	1275.5	1264
177	1090E	4	3	67	69	37.52	3.43		1272.8	1280.8	1267.1		1283.69		1274	1275	1272.2						1275.3	1277.3	1263.5		37.52	3.43	1272.8	1280.8	1267.1
177	1090E	4	3	72	74	37.57	3.18		1279.1	1285.2	1273.1		1286.85		1281.8	1282.8	1281.1						1280.7	1285.4	1264.8		37.57	3.18	1279.1	1285.2	1273.1
177	1090E	4	3	77	79	37.62	3.7		1282.2	1288.5	1277.1		1290		1287.9	1289.4	1287.2						1286.4	1292.5	1266.5		37.62	3.7	1282.2	1288.5	1277.1
177	1090E	4	3	87	89	37.72	3.67		1289.2	1294.2	1285.2		1295.48		1295	1297.3	1291.7						1292.8	1297.9	1269.9		37.72	3.67	1289.2	1294.2	1285.2
177	1090E	4	3	112	114	37.97	3.47		1301.3	1305.7	1297.3		1309.19		1303.9	1304.9	1302.4						1304.6	1307.3	1296.5		37.97	3.47	1301.3	1305.7	1297.3
177	1090E	4	3	117	119	38.02	3.22		1304.3	1308.7	1299.6		1311.93		1305.7	1306.9	1305.2						1306.6	1309	1298.5		38.02	3.22	1304.3	1308.7	1299.6
177	1090E	4	3	122	124	38.07	3.24		1306.7	1312	1302.6		1314.67		1307.2	1307.9	1306.2						1308.3	1310.7	1300.9		38.07	3.24	1306.7	1312	1302.6
177	1090E	4	3	127	129	38.12	3.29		1309	1314.7	1305.3		1317.41		1308.7	1309.7	1307.7						1309.7	1312.4	1304.3		38.12	3.29	1309	1314.7	1305.3
177	1090E	4	3	132	134	38.17	3.17		1313	1318.1	1307.7		1320.15		1310.2	1312	1309.2						1311	1314.1	1307.3		38.17	3.17	1313	1318.1	1307.7
177	1090E	4	3	137	139	38.22	3.24		1316.1	1320.4	1310		1322.89		1311.5	1313.5	1310.7						1312.7	1315.4	1309.3		38.22	3.24	1316.1	1320.4	1310
177	1090E	4	3	142	144	38.27	3.24		1319.4	1322.8	1313		1325.64		1313.3	1314.8	1312.2						1314.4	1317.1	1311.4		38.27	3.24	1319.4	1322.8	1313
177	1090E	4	3	147	149	38.32	3.18		1322.1	1324.8	1317.4		1328.38		1314.8	1317.1	1314						1316.1	1318.8	1313.7		38.32	3.18	1322.1	1324.8	1317.4
177	1090E	4	4	2	4	38.37	3.04		1325.1	1326.8	1320.1		1331.12		1316.6	1318.8	1315.5						1318.4	1321.5	1316.1		38.37	3.04	1325.1	1326.8	1320.1
177	1090E	4	4	7	9	38.42	3.43		1328.8	1331.8	1324.8		1333.86		1325.2	1327	1323.9						1322.8	1326.2	1320.8		38.42	3.43	1328.8	1331.8	1324.8
177	1090E	4	4	12	14	38.47	3.98		1332.2	1336.2	1331.2		1336.6		1333.5	1334.8	1333						1329.9	1330.2	1328.6		38.47	3.98	1332.2	1336.2	1331.2
177	1090E	4	4	17	19	38.52	3.63		1336.2	1339.9	1333.8		1339.38		1337.3	1340.9	1335.3						1333.9	1336	1330.6		38.52	3.63	1336.2	1339.9	1333.8
177	1090E	4	4	22	24	38.57	3.46		1341.2	1343.2	1337.5		1342.15		1342.9	1345.7	1338.6						1337.3	1341	1334.6		38.57	3.46	1341.2	1343.2	1337.5
177	1090E	4	4	27	29	38.62	3.06		1343.9	1346.3	1340.2		1344.93		1347.5	1349	1345.5						1343.4	1345.4	1340		38.62	3.06	1343.9	1346.3	1340.2
177	1090E	4	4	32	34	38.67	3.19		1346.6	1349.6	1343.9		1347.71		1349.8	1350.8	1348.2						1346.4	1348.1	1342.7		38.67	3.19	1346.6	1349.6	1343.9
177	1090E	4	4	37	39	38.72	2.66		1348.9	1352	1346.3		1350.48		1351.8	1353.3	1351						1350.1	1354.2	1349.8		38.72	2.66	1348.9	1352	1346.3
177	1090E	4	4	42	44	38.77	2.8		1351.6	1354.3	1348.9		1353.26		1353.3	1354.3	1352.3						1354.5	1356.2	1353.5		38.77	2.8	1351.6	1354.3	1348.9
177	1090E	4	4	47	49	38.82	2.61		1354	1357	1351.3		1356.04		1354.6	1354.8	1353.3						1358.6	1360.9	1356.2		38.82	2.61	1354	1357	1351.3
177	1090E	4	4	52	54	38.87	2.83		1356.3	1359.3	1353.3		1358.82		1356.1	1357.1	1354.6						1362.6	1364.3	1360.6		38.87	2.83	1356.3	1359.3	1353.3
177	1090E	4	4	57	59	38.92	2.84		1359	1362.7	1356.3		1361.59		1358.4	1360.9	1356.1						1365.3	1367	1363.3		38.92	2.84	1359	1362.7	1356.3
177	1090E	4	4	62	64	38.97	3.55		1365.1	1367.7	1361		1364.37		1363.5	1365.2	1363.2						1372.7	1374.4	1368.3		38.97	3.55	1365.1	1367.7	1361
177	1090E	4	4	67	69	39.02	3.49		1367.4	1370.4	1364		1367.15		1366.5	1369.3	1365.7						1375.1	1377.1	1371.7		39.02	3.49	1367.4	1370.4	1364
177	1090E	4	4	72	74	39.07	3.55		1370.1	1374.5	1367.4		1369.92		1369.8	1370.8	1369						1377.8	1380.8	1375.1		39.07	3.55	1370.1	1374.5	1367.4
177	1090E	4	4	77	79	39.12	3.62		1372.4	1377.5	1370.1		1372.7		1373.6	1375.9	1372.1						1380.8	1383.2	1378.1		39.12	3.62	1372.4	1377.5	1370.1
177	1090E	4	4	82	84	39.17	3.58		1376.8	1381.2	1373.1		1377.61		1376.6	1378.9	1375.4						1383.2	1385.2	1380.5		39.17	3.58	1376.8	1381.2	1373.1
177	1090E	4	4	87	89	39.22	3.47		1381.2	1384.9	1379.1		1382.53		1379.7	1380.9	1378.4						1385.9	1387.9	1383.5		39.22	3.47	1381.2	1384.9	1379.1
177	1090E	4	4	92	94	39.27	3.49		1384.2	1389.9	1381.5		1387.44		1382.5	1383	1381.2						1388.2	1390.2	1386.2		39.27	3.49	1384.2	1389.9	1381.5
177	1090E	4	4	97	99	39.32	3.19		1390.6	1395.6	1386.5		1392.35		1390.1	1390.8	1388						1394.6	1397.7	1393.6		39.32	3.19	1390.6	1395.6	1386.5
177	1090E	4	4	102	104	39.37	2.94		1395.9	1399.6	1391.9		1397.26		1397.2	1398.7	1395.1						1401.4	1404.7	1399		39.37	2.94	1395.9	1399.6	1391.9
177	1090E	4	4	107	109	39.42	3.25		1402.6	1405.3	1399.3		1402.18		1404	1406	1403.2						1406.8	1408.1	1405.4		39.42	3.25	1402.6	1405.3	1399.3
177	1090E	4	4	112	114	39.47	3.75		1409.4	1412	1405.3		1407.09		1409.3	1411.4	1407.6						1410.5	1412.8	1409.5		39.47	3.75	1409.4	1412	1405.3
177	1090E	4	4	117	119	39.52	3.81		1412.7	1416.1	1409.4		1412		1412.1	1413.9	1411.1						1413.5	1415.2	1411.5		39.52	3.81	1412.7	1416.1	1409.4
177	1090E	4	4	122	124	39.57	3.63		1417.7	1420.4	1414.4		1414.59		1414.9	1416.9	1413.4						1416.2	1419.2	1414.2		39.57	3.63	1417.7	1420.4	1414.4
177	1090E	4	4	127	129	39.62	3.66		1421.8	1422.8	1420.1		1417.18		1421.5	1422.8	1416.2						1420.9	1422.3	1417.2		39.62	3.66	1421.8	1422.8	1420.1
177	1090E	4	4	132	134	39.67	2.93		1429.2	1430.5	1427.1		1419.76		1429.1	1430.1	1423						1425	1427.3	1423.6		39.67	2.93	1429.2	1430.5	1427.1
177	1090E	4	4	137	139	39.72	2.72		1431.8	1434.5	1430.2		1422.35		1431.4	1432.4	1431.1						1429	1431	1425.6		39.72	2.72	1431.8	1434.5	1430.2
177	1090E	4	4	142	144	39.77	2.73		1433.5	1437.2	1431.8		1424.94		1432.9	1434.4	1432.1						1430.7	1433.1	1428.7		39.77	2.73	1433.5	1437.2	1431.8
177	1090E	4	4	144	146	39.79	2.69		1434.2	1437.9	1432.5		1425.98		1433.4	1435.2	1432.7						1431.4	1434.4	1429.7		39.79	2.69	1434.2	1437.9	1432.5
177	1090E	4	5	2	4	39.87	2.86		1436.5	1440.2	1434.2		1430.12		1434.9	1436.5	1434.2						1433.4	1440.1	1432		39.87	2.86	1436.5	1440.2	1434.2
177	1090E	4	5	7	9	39.92	2.68		1437.9	1441.6	1435.5		1432.71		1436.2	1437.7	1435.2						1434.4	1441.5	1433.4		39.92	2.68	1437.9	1441.6	1435.5
177	1090E	4	5	12	14	39.97	2.56		1438.9	1442.9	1436.9		1435.29		1437.5	1438.7	1436.5						1438.4	1442.8	1435.1		39.97	2.56	1438.9	1442.9	1436.9
177	1090E	4	5	17	19	40.02	2.75		1440.6	1444.3	1437.9		1437.88		1439	1440	1437.7						1440.5	1443.8	1438.8		40.02	2.75	1440.6	1444.3	1437.9
177	1090E	4	5	22	24	40.07	2.65		1442.6	1445.9	1439.6		1440.47		1440.5	1440.8	1439						1443.2	1445.2	1440.8		40.07	2.65	1442.6	1445.9	1439.6
177	1090E	4	5	27	29	40.12	2.75		1444.6	1447.6	1440.9		1443.06		1442	1442.5	1440.5						1444.5	1446.5	1442.8		40.12	2.75	1444.6	1447.6	1440.9
177	1090E	4	5	32	34	40.17	2.74		1446.6	1449	1442.9		1445.65		1443.6	1444.6	1441.8						1445.9	1447.5	1444.2		40.17	2.74	1446.6	1449	1442.9
177	1090E	4	5	37	39	40.22	2.8		1448.3	1450.6	1444.6		1448.24		1445.3	1446.3	1443.3						1447.2	1448.6	1445.5		40.22	2.8	1448.3	1450.6	1444.6
177	1090E	4	5	42	44	40.27	2.72		1449.6	1451.6	1446.3		1450.82		1446.8	1447.6	1444.8						1448.6	1449.9	1446.9		40.27	2.72	1449.6	1451.6	1446.3
177	1090E	4	5	47	49	40.32	2.7		1451.6	1453	1449		1453.41		1448.6	1448.9	1447.4						1450.2	1451.3	1449.2		40.32	2.7	1451.6	1453	1449
177	1090E	4	5	52	54	40.37	3.17		1453.3	1455	1451.3		1456		1451.7	1452.9	1451.2						1451.6	1452.3	1450.6		40.37	3.17	1453.3	1455	1451.3
177	1090E	4	5	57	59	40.42	2.87		1476	1476.4	1476		1460.25		1476	1476.3	1476						1479.6	1484.9	1476.7		40.42	2.87	1476	1476.4	1476
177	1090E	4	5	62	64	40.47	2.87		1478	1480	1477.3		1464.5		1477.6	1479.1	1477						1484.4	1494.2	1480.2		40.47	2.87	1478	1480	1477.3
177	1090E	4	5	67	69	40.52	2.85		1480.7	1482.7	1478.9		1468.75		1480	1481.7	1478.4						1489.3	1496.9	1483.3		40.52	2.85	1480.7	1482.7	1478.9
177	1090E	4	5	72	74	40.57	2.95		1483.1	1485.6	1480.9		1473		1482.3	1484.2	1480.3						1495.5	1499.5	1487.6		40.57	2.95	1483.1	1485.6	1480.9
177	1090D	5	1	51	53	40.62	2.76		1485.6	1487.6	1483.3		1477.25		1484.9	1486.2	1482.4						1498.9	1502.7	1490		40.62	2.76	1485.6	1487.6	1483.3
177	1090D	5	1	56	58	40.67	2.84		1488	1489.8	1486		1481.5		1486.6	1488.1	1484.9						1502.2	1505.1	1494.2		40.67	2.84	1488	1489.8	1486
177	1090D	5	1	61	63	40.72	2.84		1490	1491.6	1488.4		1485.75		1488.5	1490.4	1486.9						1505.5	1507.8	1498.4		40.72	2.84	1490	1491.6	1488.4
177	1090D	5	1	66	68	40.77	2.91		1492.7	1492.9	1491.1		1490		1490.8	1492.8	1489.5						1509.1	1510.4	1504.7		40.77	2.91	1492.7	1492.9	1491.1
177	1090D	5	1	71	73	40.82	3.75		1498.9	1505.8	1494.9		1497.14		1496.7	1503.3	1495.1						1513.5	1514.4	1511.5		40.82	3.75	1498.9	1505.8	1494.9
177	1090D	5	1	76	78	40.87	3.62		1507.1	1511.1	1500.4		1504.28		1506.1	1508.6	1501.5						1516.2	1518.2	1514.2		40.87	3.62	1507.1	1511.1	1500.4
177	1090D	5	1	81	83	40.92	3.3		1513.8	1517.5	1511.3		1511.42		1513.1	1517.4	1511.4						1519.3	1521.5	1516.9		40.92	3.3	1513.8	1517.5	1511.3
177	1090D	5	1	86	88	40.97	3.12		1518.9	1522.4	1516		1518.56		1519.6	1522.9	1516.1						1523.1	1524.9	1520.2		40.97	3.12	1518.9	1522.4	1516
177	1090D	5	1	91	93	41.02	3.15		1523.3	1527.5	1520.4		1525.7		1525.7	1527.4	1522.4						1526.4	1527.8	1524.7		41.02	3.15	1523.3	1527.5	1520.4
177	1090D	5	1	96	98	41.07	3.84		1528.9	1532	1524.9		1530.07		1531.6	1533.3	1531.3						1530	1531.1	1528.7		41.07	3.84	1528.9	1532	1524.9
177	1090D	5	1	101	103	41.12	3.8		1532.4	1535.3	1528.7		1534.43		1534.6	1536.4	1532.9						1533.8	1534.4	1530.4		41.12	3.8	1532.4	1535.3	1528.7
177	1090D	5	1	106	108	41.17	3.67		1536	1538.2	1532.2		1538.8		1537.3	1538.8	1535.8						1537.5	1538.9	1532.4		41.17	3.67	1536	1538.2	1532.2
177	1090D	5	1	111	113	41.22	4.04		1539.3	1541.1	1535.8		1543.17		1539.9	1541.1	1538.8						1540.2	1542.4	1534.2		41.22	4.04	1539.3	1541.1	1535.8
177	1090D	5	1	116	118	41.27	3.73		1542.6	1545.3	1539.5		1547.53		1542.6	1543.6	1541.4						1542.4	1555.1	1537.8		41.27	3.73	1542.6	1545.3	1539.5
177	1090D	5	1	121	123	41.32	3.62		1546.9	1552.6	1543.8		1551.9		1545.8	1546.1	1544.3						1554.4	1559.8	1541.1		41.32	3.62	1546.9	1552.6	1543.8
177	1090D	5	1	126	128	41.37	3.27		1552.6	1558.4	1547.8		1556.27		1550.3	1554.5	1548.8						1560.6	1564	1545.3		41.37	3.27	1552.6	1558.4	1547.8
177	1090D	5	1	131	133	41.42	3.22		1559.3	1564	1552.6		1560.63		1557.5	1560.7	1553						1564.2	1566.9	1551.1		41.42	3.22	1559.3	1564	1552.6
177	1090D	5	1	136	138	41.47	3		1566	1568.6	1560.6		1565		1565	1566.2	1561.7						1568.2	1570.2	1563.1		41.47	3	1566	1568.6	1560.6
177	1090D	5	1	141	143	41.52	3.68		1572.9	1576.9	1570.4		1570.42		1572	1574.2	1571.3						1573.3	1576.9	1571.5		41.52	3.68	1572.9	1576.9	1570.4
177	1090D	5	1	146	148	41.57	3.77		1578.6	1582.9	1576		1575.83		1577.4	1578.7	1575						1579.1	1582.6	1575.5		41.57	3.77	1578.6	1582.9	1576
177	1090D	5	2	1	3	41.62	3.42		1584.9	1589.5	1581.7		1581.25		1582	1583.9	1579.4						1585.1	1594.9	1581.7		41.62	3.42	1584.9	1589.5	1581.7
177	1090D	5	2	6	8	41.67	3.11		1590.9	1597.3	1587.1		1586.67		1586.5	1588.2	1583.9						1591.1	1602.2	1586.4		41.67	3.11	1590.9	1597.3	1587.1
177	1090D	5	2	11	13	41.72	3.17		1596.6	1602.6	1590.9		1592.08		1590.4	1591.7	1587.7						1596.9	1606.6	1591.1		41.72	3.17	1596.6	1602.6	1590.9
177	1090D	5	2	16	18	41.77	3.21		1600.9	1608	1596		1597.5		1595.2	1596.2	1593.2						1602.4	1610.4	1598		41.77	3.21	1600.9	1608	1596
177	1090D	5	2	21	23	41.82	2.9		1605.3	1617.1	1600.2		1602.92		1602.1	1603.7	1599.2						1607.7	1615.5	1605.5		41.82	2.9	1605.3	1617.1	1600.2
177	1090D	5	2	26	28	41.87	3.13		1611.1	1622	1604.2		1608.33		1609.4	1611.1	1605.8						1614.4	1622.6	1609.3		41.87	3.13	1611.1	1622	1604.2
177	1090D	5	2	31	33	41.92	3.14		1619.5	1626.2	1608.4		1613.75		1619.6	1622.6	1610.6						1620.6	1628.2	1613.1		41.92	3.14	1619.5	1626.2	1608.4
177	1090D	5	2	36	38	41.97	3.22		1624.8	1631.1	1614.8		1619.17		1625.3	1626.1	1622.8						1628	1635.3	1619.3		41.97	3.22	1624.8	1631.1	1614.8
177	1090D	5	2	41	43	42.02	3.04		1629.5	1635.3	1621.3		1624.58		1630.1	1632.8	1628.8						1636.8	1640.2	1624.4		42.02	3.04	1629.5	1635.3	1621.3
177	1090D	5	2	46	48	42.07	2.92		1634	1639.3	1627.3		1630		1634.1	1637.2	1631.8						1641.1	1643.9	1635.7		42.07	2.92	1634	1639.3	1627.3
177	1090D	5	2	56	58	42.17	3.29		1641.5	1646.2	1634.8		1639.76		1641.7	1643.5	1639.5						1647.1	1649.3	1645.1		42.17	3.29	1641.5	1646.2	1634.8
177	1090D	5	2	61	63	42.22	3.75		1645.3	1650.6	1639.3		1644.64		1644.7	1647	1643.8						1650.8	1655.1	1649.5		42.22	3.75	1645.3	1650.6	1639.3
177	1090D	5	2	66	68	42.27	3.6		1648.6	1653.7	1642.8		1649.52		1647.2	1649.3	1645.5						1654.4	1660.4	1653.3		42.27	3.6	1648.6	1653.7	1642.8
177	1090D	5	2	71	73	42.32	3.63		1652.2	1657.9	1646.4		1654.4		1649.5	1651.2	1647.5						1658.2	1664.2	1656.6		42.32	3.63	1652.2	1657.9	1646.4
177	1090D	5	2	76	78	42.37	3.68		1655.7	1661.3	1649.7		1659.29		1651.7	1653.9	1649.7						1662.6	1667.3	1659.7		42.37	3.68	1655.7	1661.3	1649.7
177	1090D	5	2	81	83	42.42	3.77		1659.5	1664.6	1653.1		1664.17		1654	1656.2	1652.2						1666.4	1670.4	1662.6		42.42	3.77	1659.5	1664.6	1653.1
177	1090D	5	2	86	88	42.47	3.85		1663.5	1667.9	1656.4		1669.05		1656	1660.2	1654.7						1671.1	1673.5	1665.9		42.47	3.85	1663.5	1667.9	1656.4
177	1090D	5	2	91	93	42.52	3.52		1669.1	1677.7	1661.1		1673.93		1659.9	1663.7	1657.7						1676.4	1679.5	1669.5		42.52	3.52	1669.1	1677.7	1661.1
177	1090D	5	2	101	103	42.62	3.36		1680.6	1692.4	1669.1		1683.69		1667.6	1672.4	1666.4						1688.2	1695.9	1677.9		42.62	3.36	1680.6	1692.4	1669.1
177	1090D	5	2	106	108	42.67	3.46		1689	1697.9	1674.4		1688.57		1672.5	1697.7	1669.3						1695.5	1701.7	1680.8		42.67	3.46	1689	1697.9	1674.4
177	1090D	5	2	121	123	42.82	3.68		1703.5	1710.6	1687.7		1703.21		1700.8	1706.9	1698.9						1708.4	1711.5	1703		42.82	3.68	1703.5	1710.6	1687.7
177	1090D	5	2	136	138	42.97	3.49		1715.5	1727.7	1701		1717.86		1712.8	1723.9	1709						1725.7	1727.9	1710.4		42.97	3.49	1715.5	1727.7	1701
177	1090D	5	2	141	143	43.02	3.3		1721	1734.1	1708.8		1722.74		1721.5	1727.3	1712.8						1731.9	1734.1	1714.4		43.02	3.3	1721	1734.1	1708.8
177	1090D	5	2	146	148	43.07	3.5		1726.6	1740.1	1713.3		1727.62		1727.3	1730.7	1722.3						1738.1	1739.3	1722.8		43.07	3.5	1726.6	1740.1	1713.3
177	1090D	5	3	1	3	43.12	3.59		1732.4	1744.8	1719.3		1732.5		1732.9	1733.7	1731.3						1742.8	1744.1	1726.8		43.12	3.59	1732.4	1744.8	1719.3
177	1090D	5	3	6	8	43.17	3.31		1738.8	1748.1	1725.7		1739.17		1740.2	1743.1	1738.8						1745.9	1746.4	1731.9		43.17	3.31	1738.8	1748.1	1725.7
177	1090D	5	3	11	13	43.22	3.8		1744.8	1751	1731.9		1745.83		1747	1748.6	1744.4						1748.6	1749.5	1738.8		43.22	3.8	1744.8	1751	1731.9
177	1090D	5	3	21	23	43.32	3.56		1755.2	1758.6	1744.4		1759.17		1757.5	1758.6	1752.8						1753.9	1755.2	1749.2		43.32	3.56	1755.2	1758.6	1744.4
177	1090D	5	3	26	28	43.37	3.17		1760.1	1766.4	1750.6		1765.83		1763.5	1768.3	1760.7						1756.4	1771	1754.6		43.37	3.17	1760.1	1766.4	1750.6
177	1090D	5	3	31	33	43.42	2.85		1765.2	1771.2	1757.2		1772.5		1771.7	1773.5	1765.6						1766.8	1776.6	1758.1		43.42	2.85	1765.2	1771.2	1757.2
177	1090D	5	3	41	43	43.52	3.17		1774.4	1781.9	1768.1		1781.5		1779.1	1780.7	1776.5						1782.1	1783.7	1774.1		43.52	3.17	1774.4	1781.9	1768.1
177	1090D	5	3	46	48	43.57	3.45		1778.1	1787.2	1774.1		1786		1782.2	1783.6	1781.4						1786.8	1789	1783.7		43.57	3.45	1778.1	1787.2	1774.1
177	1090D	5	3	56	58	43.67	3.51		1784.6	1794.3	1779.9		1795		1786.6	1788.8	1784.1						1794.8	1797	1788.3		43.67	3.51	1784.6	1794.3	1779.9
177	1090D	5	3	61	63	43.72	3.39		1787.9	1797.7	1783.9		1798.5		1788.5	1790.9	1786.9						1797	1799.9	1794.6		43.72	3.39	1787.9	1797.7	1783.9
177	1090D	5	3	66	68	43.77	3.39		1791	1800.8	1787.7		1802		1790.9	1793.5	1789.6						1799.7	1802.6	1796.8		43.77	3.39	1791	1800.8	1787.7
177	1090D	5	3	76	78	43.87	3.23		1798.3	1805.9	1794.3		1809		1797	1798.5	1796.4						1803.2	1807	1801		43.87	3.23	1798.3	1805.9	1794.3
177	1090D	5	3	81	83	43.92	3.45		1801.7	1808.3	1797.9		1812.5		1800.1	1801.2	1798.7						1805.7	1809.7	1803.9		43.92	3.45	1801.7	1808.3	1797.9
177	1090D	5	3	86	88	43.97	3.22		1805.2	1812.1	1801.5		1816		1803	1804.8	1801.4						1808.3	1812.3	1806.6		43.97	3.22	1805.2	1812.1	1801.5
177	1090D	5	3	91	93	44.02	3.23		1808.3	1815.5	1804.6		1819.5		1805.4	1807.5	1803.8						1810.8	1815.2	1808.3		44.02	3.23	1808.3	1815.5	1804.6
177	1090D	5	3	96	98	44.07	3.13		1812.6	1819	1807.2		1823		1807.7	1810.1	1806.3						1813.5	1818.3	1811		44.07	3.13	1812.6	1819	1807.2
177	1090D	5	3	101	103	44.12	3.02		1816.6	1822.1	1810.6		1826.5		1810.5	1813.8	1808.8						1815.9	1821.9	1813.2		44.12	3.02	1816.6	1822.1	1810.6
177	1090D	5	3	106	108	44.17	2.98		1820.8	1825	1813.7		1830		1814.2	1816.1	1810.5						1818.3	1824.3	1815.7		44.17	2.98	1820.8	1825	1813.7
177	1090D	5	3	111	113	44.22	3.13		1824.3	1827.9	1817		1832.03		1816.1	1822.4	1813.8						1822.1	1827.9	1818.1		44.22	3.13	1824.3	1827.9	1817
177	1090D	5	3	116	118	44.27	3.3		1827.9	1831	1821.4		1834.06		1824	1826.1	1819.5						1825.4	1831.7	1821.7		44.27	3.3	1827.9	1831	1821.4
177	1090D	5	3	121	123	44.32	2.99		1831.2	1833.4	1826.8		1836.09		1830	1831	1828.9						1828.3	1833.2	1826.8		44.32	2.99	1831.2	1833.4	1826.8
177	1090D	5	3	126	128	44.37	3.23		1835	1835	1834.3		1838.12		1835	1835	1834.4						1835	1835	1833.4		44.37	3.23	1835	1835	1834.3
177	1090D	5	3	131	133	44.42	3.07		1867.5	1868	1867.5		1840.16		1872.4	1877.3	1868.8						1867	1867.2	1867		44.42	3.07	1867.5	1868.6	1867.5
177	1090D	5	3	136	138	44.47	3.29		1871.3	1879.7	1868.4		1842.19		1874.8	1880.1	1872.4						1868.1	1869.4	1867.7		44.47	3.29	1881	1882.7	1868.9
177	1090D	5	3	141	143	44.52	3.1		1875	1885	1870.6		1844.22		1877.3	1882.4	1876.3						1870.2	1871.3	1869.4		44.52	3.1	1886.7	1895.3	1871.8
177	1090D	5	3	146	148	44.57	3.43		1878.3	1888.4	1872.6		1846.25		1879.7	1884.9	1877.9						1872.2	1873.6	1871.2		44.57	3.43	1895.8	1905.6	1874.4
177	1090D	5	4	1	3	44.62	3.29		1881.2	1891.5	1874.7		1848.28		1882.1	1886.6	1879.9						1874.4	1876.8	1873		44.62	3.29	1902.4	1912.2	1877.2
177	1090D	5	4	6	8	44.67	3.32		1886.6	1894.1	1876.9		1850.31		1884.4	1890.7	1882.1						1877.2	1880.6	1874.9		44.67	3.32	1909.6	1919.3	1879.8
177	1090D	5	4	11	13	44.72	3.38		1889.8	1895.9	1879.4		1852.34		1886.2	1894.2	1884.6						1881.5	1887.5	1877.2		44.72	3.38	1915.3	1924.5	1883
177	1090D	5	4	16	18	44.77	3.23		1892.9	1897.8	1881.8		1854.38		1891	1896.3	1887.6						1886.7	1891.7	1880.4		44.77	3.23	1921.9	1929.9	1886.7
177	1090D	5	4	31	33	44.92	3.54		1899	1901.1	1894.9		1860.47		1899	1899.7	1896						1899.9	1901.4	1898.5		44.92	3.54	1939.4	1942.8	1896.4
177	1090D	5	4	36	38	44.97	3.64		1900.8	1903.3	1899		1862.5		1900.3	1901.3	1899						1902.1	1903.5	1900.6		44.97	3.64	1942.5	1946.5	1899.3
177	1090D	5	4	41	43	45.02	3.24		1902.9	1905.1	1901.4		1881.25		1901.8	1902.8	1901.3						1904.1	1904.7	1902.6		45.02	3.24	1945.1	1949.1	1901.6
177	1090D	5	4	46	48	45.07	3.74		1904.9	1907.1	1903.1		1900		1903.1	1904	1902.2						1906.3	1907.3	1904.8		45.07	3.74	1947.4	1950.8	1903.6
177	1090D	5	4	51	53	45.12	3.71		1906.8	1909	1905		1902.86		1904.5	1905.6	1903.4						1908.7	1909.9	1906.9		45.12	3.71	1949.7	1953.4	1905.6
177	1090D	5	4	56	58	45.17	3.6		1908.8	1911	1907.2		1905.71		1906	1907.2	1905						1910.9	1912.8	1909.3		45.17	3.6	1952.3	1956.3	1907.6
177	1090D	5	4	61	63	45.22	3.38		1911.1	1912.9	1909.1		1908.57		1907.7	1909	1906.6						1913.1	1916.7	1911.5		45.22	3.38	1955.1	1959.1	1910.2
177	1090D	5	4	66	68	45.27	3.42		1913.2	1915	1911.1		1911.43		1909.5	1910.9	1908.2						1915.4	1921.1	1913.4		45.27	3.42	1957.7	1962.3	1912.5
177	1090D	5	4	71	73	45.32	3.42		1915.5	1917	1913.3		1914.29		1911.5	1912.7	1910						1917.6	1924.4	1915.6		45.32	3.42	1960.3	1965.1	1914.7
177	1090D	5	4	76	78	45.37	3.57		1917.7	1918.7	1915.8		1917.14		1913.3	1913.7	1912						1920.2	1926.7	1918.4		45.37	3.57	1962.9	1968.3	1917.3
177	1090D	5	4	81	83	45.42	3.28		1920.3	1922.7	1918.6		1920		1915.8	1919.7	1914.2						1924.1	1929.1	1921		45.42	3.28	1965.7	1971.2	1919.9
177	1090D	5	4	86	88	45.47	3.17		1923	1926.2	1921.2		1922.86		1918.7	1923.4	1916.9						1928.9	1932	1923.2		45.47	3.17	1969.2	1975.5	1922.8
177	1090D	5	4	96	98	45.57	2.88		1928.9	1932.4	1926.4		1928.57		1925.4	1930.1	1923.8						1934.2	1936.3	1929.6		45.57	2.88	1975.5	1982.3	1928.5
177	1090D	5	4	101	103	45.62	2.84		1931	1935.2	1928.9		1931.43		1928	1933.4	1926.3						1936.6	1938.3	1932		45.62	2.84	1980	1985.5	1930.8
177	1090D	5	4	106	108	45.67	3.1		1933.3	1937.8	1931		1934.29		1930.6	1936.5	1928.6						1939.1	1941.1	1934.2		45.67	3.1	1984.3	1988.3	1933.1
177	1090D	5	4	111	113	45.72	2.82		1936.1	1940.5	1933.8		1937.14		1933.3	1939.2	1931.6						1941.8	1943	1936.7		45.72	2.82	1988.6	1991.2	1935.4
177	1090D	5	4	116	118	45.77	2.99		1939.8	1943.7	1936.6		1940		1939.6	1941.2	1934.3						1944.3	1945.6	1941.6		45.77	2.99	1993.5	1996.1	1938.5
177	1090D	5	4	121	123	45.82	3.51		1943.8	1949.8	1941.4		1943.33		1944.7	1951.9	1941.7						1948.4	1949.9	1946.3		45.82	3.51	1998.1	2001.8	1942.2
177	1090D	5	4	126	128	45.87	3.51		1948.3	1954.3	1944.3		1946.67		1953	1956.2	1945.9						1952.8	1955.9	1949		45.87	3.51	2002.7	2007.2	1946.2
177	1090D	5	4	131	133	45.92	3.29		1952.6	1959.7	1949		1950		1958	1964	1955.1						1956.8	1959.9	1953.7		45.92	3.29	2007	2011.3	1950.3
177	1090D	5	4	136	138	45.97	3.34		1956.6	1964.1	1952.5		1953.33		1963.9	1968.9	1959.5						1960.7	1963	1956.2		45.97	3.34	2011.3	2015	1954.6
177	1090D	5	4	141	143	46.02	3.07		1960.2	1968.8	1956.3		1956.67		1967.6	1972	1966.4						1963.8	1965.6	1958.5		46.02	3.07	2014.4	2018.7	1958.6
177	1090D	5	4	146	148	46.07	3.22		1964.1	1973.8	1959.5		1960		1970.8	1974.2	1968.9						1966	1968	1961.3		46.07	3.22	2017.6	2023.3	1962.6
177	1090D	5	5	1	3	46.12	3.15		1968.3	1977.4	1963.4		1963.33		1974.1	1976	1971.7						1968.1	1969.8	1964.4		46.12	3.15	2020.1	2027.3	1966.6
177	1090D	5	5	11	13	46.22	2.91		1975.9	1983.4	1970.5		1970		1979.2	1980.9	1976.9						1971.7	1973.9	1969.7		46.22	2.91	2025.3	2035.6	1973.2
177	1090D	5	5	16	18	46.27	2.85		1980.2	1986.3	1974.4		1973.33		1981.2	1983.1	1979.2						1973.9	1976	1971.8		46.27	2.85	2028.4	2040.7	1976.6
177	1090D	5	5	21	23	46.32	2.84		1984.2	1988.6	1979.1		1976.67		1983.5	1985.1	1981.2						1976.2	1978	1974.2		46.32	2.84	2031.3	2046.8	1981.2
177	1090D	5	5	26	28	46.37	2.89		1988.5	1991.1	1983.5		1980		1985.7	1987.4	1984						1978.5	1980.3	1976.4		46.37	2.89	2035	2052.2	1985.5
177	1090D	5	5	31	33	46.42	3.18		1992	1993.9	1987.9		1983.33		1988.3	1992	1986.6						1981.1	1982.9	1979.3		46.42	3.18	2039.9	2056.8	1988.1
177	1090D	5	5	36	38	46.47	3.35		1994.5	1996.6	1991.1		1986.67		1990.7	1997	1988.9						1983.9	1986.2	1981.9		46.47	3.35	2045	2061.1	1991.2
177	1090D	5	5	41	43	46.52	3.56		1996.7	1998.9	1994.8		1990		1993.4	2000.8	1991.5						1986.5	1990.1	1984.7		46.52	3.56	2050.5	2065.4	1994.9
177	1090D	5	5	46	48	46.57	3.57		1998.7	2001	1997		1992.71		1996.9	2003.8	1993.2						1989.7	1992.4	1986.8		46.57	3.57	2055.9	2069.4	1996.9
177	1090D	5	5	51	53	46.62	3.55		2000.3	2004	1998.7		1995.41		1999.4	2005.5	1996.6						1992.2	1994.6	1989.8		46.62	3.55	2062.5	2075.1	1999.2
177	1090D	5	5	56	58	46.67	3.5		2002	2007.5	2000.3		1998.12		2001.1	2007.8	1999.4						1994.4	1997.6	1992.4		46.67	3.5	2068.5	2078.3	2000.9
177	1090D	5	5	61	63	46.72	3.22		2003.7	2010.8	2002.1		2000.82		2003	2010.2	2001.5						1996.1	1999.9	1995.1		46.72	3.22	2077.7	2081.1	2002.9
177	1090D	5	5	66	68	46.77	3.68		2005.7	2013.8	2004.1		2003.53		2004.7	2013.8	2003.8						1998.2	2001.7	1997.6		46.77	3.68	2081.7	2084.8	2005
177	1090D	5	5	71	73	46.82	3.53		2007.9	2015.3	2005.8		2006.24		2006.4	2014.5	2005.2						2000.7	2003.1	1999		46.82	3.53	2085.4	2088.6	2007
177	1090D	5	5	76	78	46.87	3.47		2010.1	2017.1	2008		2008.94		2008.4	2015.6	2007.1						2003.1	2004.8	2001.3		46.87	3.47	2089.4	2093.4	2009.2
177	1090D	5	5	81	83	46.92	3.17		2012.4	2018.7	2010.2		2011.65		2010.8	2016.8	2009.1						2005.6	2007.4	2003.8		46.92	3.17	2093.7	2098.6	2012.1
177	1090E	5	2	0	2	46.99	3.02		2015.6	2021.6	2013.9		2015.44		2016.3	2018.5	2011.3						2009.5	2010.8	2006.6		46.99	3.02	2099.5	2104.3	2015.3
177	1090E	5	2	5	7	47.04	3.2		2018	2023.3	2015.7		2018.14		2018.2	2020.5	2013.5						2012.1	2015.1	2008.9		47.04	3.2	2103.5	2108.6	2017.6
177	1090E	5	2	10	12	47.09	3.09		2020.2	2025.4	2017.9		2020.85		2020.1	2022.3	2017.4						2015	2019	2011.4		47.09	3.09	2107.2	2112.6	2020.4
177	1090E	5	2	15	17	47.14	2.83		2022.7	2027.6	2020		2023.56		2022.2	2024	2021.4						2017.3	2022.1	2015.6		47.14	2.83	2110.9	2116.1	2022.7
177	1090E	5	2	20	22	47.19	2.8		2025	2030.2	2022.2		2026.26		2024.2	2025.3	2023.6						2019.6	2025	2016.9		47.19	2.8	2114.6	2120.9	2025.3
177	1090E	5	2	25	27	47.24	2.83		2027.4	2032.9	2024.4		2028.97		2025.8	2026.6	2024.8						2021.7	2028	2018.6		47.24	2.83	2118.9	2124.9	2027.6
177	1090E	5	2	30	32	47.29	2.96		2029.6	2035.4	2026.4		2031.68		2027.4	2028.5	2026.4						2023.7	2032	2020.4		47.29	2.96	2121.2	2128.4	2030.2
177	1090E	5	2	35	37	47.34	2.87		2032.3	2039.2	2028.6		2034.38		2029.1	2030.2	2027.8						2025.8	2043.5	2022.4		47.34	2.87	2126.4	2131.2	2032.7
177	1090E	5	2	40	42	47.39	2.88		2034.8	2043	2030.5		2037.09		2030.5	2031.6	2029.3						2027.6	2045.1	2024.5		47.39	2.88	2129.2	2133.5	2035.6
177	1090E	5	2	45	47	47.44	2.82		2038.3	2047.9	2032.6		2039.79		2032	2032.9	2030.9						2029.4	2047.4	2026.8		47.44	2.82	2131.8	2136.7	2038.5
177	1090E	5	2	50	52	47.49	2.85		2041.6	2051.4	2035.2		2042.5		2033.5	2033.7	2032.5						2032.4	2049.5	2029		47.49	2.85	2134.4	2139.3	2041
177	1090E	5	2	55	57	47.54	3.19		2045.5	2054.3	2037.5		2046.67		2035.8	2039.5	2034.2						2041.3	2052.1	2032.9		47.54	3.19	2137.3	2141.5	2044.5
177	1090E	5	2	60	62	47.59	3.09		2049.4	2057	2040.6		2050.85		2038.1	2043.5	2035.9						2046.7	2055.1	2036.6		47.59	3.09	2139.5	2143.6	2047.3
177	1090E	5	2	65	67	47.64	3.18		2053.7	2059.7	2043.6		2055.02		2040.5	2052.1	2038.3						2051.8	2058	2042.8		47.64	3.18	2142.1	2145.8	2050.5
177	1090E	5	2	70	72	47.69	3.13		2057.6	2062.9	2047.9		2059.2		2043.3	2055.3	2041.3						2057.5	2060.1	2049.5		47.69	3.13	2144.7	2148.4	2053.3
177	1090E	5	2	75	77	47.74	3.36		2061.3	2066.2	2052.3		2062.34		2047.7	2058.2	2044.4						2060.8	2062.9	2057.5		47.74	3.36	2147.3	2153.9	2057.1
177	1090E	5	2	80	82	47.79	3.35		2065.2	2077	2056.3		2065.49		2055.6	2060.7	2047.7						2063.7	2065.5	2060.5		47.79	3.35	2150.7	2157.9	2061.1
177	1090E	5	2	85	87	47.84	3.42		2074.6	2080.9	2060.4		2068.63		2060.1	2063.7	2056.3						2067.2	2076.6	2062.9		47.84	3.42	2154.7	2161.6	2065.1
177	1090E	5	2	90	92	47.89	3.46		2079	2084.6	2064.2		2071.78		2063.5	2075	2061.5						2076.3	2081.1	2065.2		47.89	3.46	2158.4	2163.9	2076.3
177	1090E	5	2	95	97	47.94	3.49		2083.1	2087.6	2073.8		2074.92		2074.4	2081.1	2068.1						2079.5	2084	2074		47.94	3.49	2162.5	2167	2081.1
177	1090E	5	2	100	102	47.99	3.43		2086.5	2090.8	2078.9		2078.07		2080.8	2085.4	2078.8						2083	2086.8	2078		47.99	3.43	2166.5	2169.9	2085.1
177	1090E	5	2	105	107	48.04	3.33		2089.5	2093.7	2084.1		2081.21		2085.3	2088.8	2083.8						2086.1	2089.4	2082.7		48.04	3.33	2169.3	2172.8	2089.1
177	1090E	5	2	110	112	48.09	3.28		2092.3	2097.9	2088.5		2084.36		2089.3	2091	2086.9						2089.3	2093.9	2086.4		48.09	3.28	2172.2	2176.2	2091.4
177	1090E	5	2	115	117	48.14	3.3		2095	2102.8	2091.3		2087.5		2093	2093.7	2090.2						2094	2097.5	2091.4		48.14	3.3	2175.3	2184.5	2094
177	1090E	5	3	0	2	48.19	3		2097.9	2107.7	2094.4		2091.56		2097.5	2100.8	2095						2099.2	2105.5	2095.4		48.19	3	2180.8	2189.7	2097.2
177	1090E	5	3	5	7	48.24	3.19		2100.8	2113.1	2096.9		2095.63		2102	2104.2	2099.5						2106.5	2109.8	2098.4		48.24	3.19	2186.8	2194.8	2100
177	1090E	5	3	10	12	48.29	3.38		2103.9	2118	2099.4		2099.69		2104.9	2106.6	2103.8						2108.8	2113	2106.9		48.29	3.38	2192.2	2199.7	2102.6
177	1090E	5	3	15	17	48.34	3.31		2106.6	2122.5	2102		2103.75		2107.3	2108.7	2105.5						2111.5	2115.6	2108.9		48.34	3.31	2195.7	2203.7	2105.5
177	1090E	5	3	40	42	48.59	3.25		2119.3	2137.4	2113		2124.06		2116.8	2119.8	2114.3						2123.8	2127.4	2118.8		48.59	3.25	2207.4	2217.4	2117.8
177	1090E	5	3	45	47	48.64	3.33		2122.3	2141.4	2116		2128.13		2119	2122.3	2116.5						2126.4	2130.4	2121.7		48.64	3.33	2210.8	2220.9	2121.5
177	1090E	5	3	50	52	48.69	3.18		2125.3	2143.5	2118.7		2132.19		2121.2	2124.9	2119						2128.6	2133.8	2124.3		48.69	3.18	2215.4	2224.9	2124.4
177	1090E	5	3	55	57	48.74	3.28		2128.5	2146.3	2121.9		2136.25		2123.5	2128.3	2121.4						2131.8	2145.1	2127.1		48.74	3.28	2219.2	2229.5	2127.8
177	1090E	5	3	75	77	48.94	3.64		2147.6	2153.9	2136.7		2152.5		2148.1	2151.6	2146.3						2149.3	2158.1	2148		48.94	3.64	2234	2245.2	2144.7
177	1090E	5	3	90	92	49.09	3.61		2157	2160.6	2146.4		2157.69		2157.6	2159.8	2156.3						2161	2164.2	2158.6		49.09	3.61	2241.2	2272.4	2155
177	1090E	5	3	95	97	49.14	3.56		2159.5	2162.8	2150.5		2159.42		2160	2162.2	2158.5						2164.7	2166.7	2161.9		49.14	3.56	2244.4	2275.6	2158.7
177	1090E	5	3	100	102	49.19	3.4		2161.8	2165	2154		2161.15		2162.2	2164.2	2161.4						2166.8	2168.9	2164.8		49.19	3.4	2247.5	2278.1	2162.5
177	1090E	5	3	105	107	49.24	3.41		2163.9	2167.1	2157.2		2162.88		2164.2	2165.6	2162.8						2168.9	2170.9	2166.7		49.24	3.41	2251.8	2280.4	2164.5
177	1090E	5	3	115	117	49.34	3.35		2167	2170.3	2163		2166.35		2166.6	2167.7	2165.3						2171.9	2173.6	2170.2		49.34	3.35	2274.1	2283.9	2168.2
177	1090E	5	3	120	122	49.39	3.43		2168.7	2172	2165.8		2168.08		2168.2	2168.7	2166.7						2173.8	2175.5	2172		49.39	3.43	2279.9	2285.9	2170.5
177	1090E	5	3	125	127	49.44	3.27		2170.8	2173.7	2168		2169.81		2169.8	2171	2168.3						2175.6	2177.5	2173.9		49.44	3.27	2284.4	2288.5	2172.8
177	1090E	5	3	130	132	49.49	3.21		2172.9	2175.9	2170.2		2171.54		2171.5	2173	2169.9						2177.5	2179.9	2175.6		49.49	3.21	2287.9	2291	2175.3
177	1090E	5	3	135	137	49.54	3.11		2174.8	2178.1	2172.4		2173.27		2173.2	2174.6	2171.5						2179.7	2182.1	2177.6		49.54	3.11	2291.3	2296.5	2177.6
177	1090E	5	3	140	142	49.59	3.11		2176.9	2180.3	2174.3		2175		2174.7	2176.2	2173						2181.8	2184.1	2179.5		49.59	3.11	2294.5	2300.2	2180.2
177	1090E	5	3	145	147	49.64	2.98		2179.1	2182.7	2176.4		2176.73		2176.3	2177.8	2174.6						2184.3	2187.2	2181.7		49.64	2.98	2298.2	2304.5	2182.8
177	1090E	5	4	0	2	49.69	3.02		2181.2	2184.9	2178.1		2178.46		2177.4	2179.4	2175.8						2187.4	2190.4	2183.6		49.69	3.02	2302.2	2308.5	2186.8
177	1090E	5	4	5	7	49.74	3.07		2183.7	2187.1	2179.9		2180.19		2178.5	2180.8	2177.2						2190.1	2194.5	2187.8		49.74	3.07	2305.9	2313.1	2190.8
177	1090E	5	4	10	12	49.79	3.09		2185.2	2189.2	2181.8		2181.92		2180.2	2182.3	2178.3						2194.4	2199.9	2190.4		49.79	3.09	2310.8	2318.2	2196.2
177	1090E	5	4	15	17	49.84	3.21		2187.1	2191.5	2184.1		2183.65		2181.7	2183.5	2179.7						2203.5	2207.5	2195.5		49.84	3.21	2315.4	2322.2	2207.1
177	1090E	5	4	20	22	49.89	3.07		2189	2194.1	2186.1		2185.38		2183	2185.6	2181.4						2208.6	2209.9	2203		49.89	3.07	2320	2326.8	2211.4
177	1090E	5	4	25	27	49.94	3.06		2190.9	2196.1	2188.1		2187.12		2184.5	2187.5	2182.9						2210.4	2212	2208.5		49.94	3.06	2324.8	2332.3	2216.6
177	1090E	5	4	30	32	49.99	3.07		2192.6	2201.9	2189.9		2188.85		2186	2189.2	2184.5						2212.2	2213.7	2210.5		49.99	3.07	2329.1	2336.8	2222
177	1090E	5	4	35	37	50.04	3.35		2194.3	2205.8	2191.7		2190.58		2187.3	2190.4	2186.3						2214.1	2215.3	2212.6		50.04	3.35	2333.4	2341.1	2226.3
177	1090E	5	4	40	42	50.09	2.88		2196	2211.3	2193.7		2192.31		2188.6	2191.2	2187.8						2216.1	2217.3	2214.8		50.09	2.88	2341.4	2350.3	2230.9
177	1090E	5	4	45	47	50.14	3.22		2198.4	2213.9	2195.8		2194.04		2191.4	2193.9	2189.7						2218.1	2219.5	2216.7		50.14	3.22	2349.4	2357.2	2235.2
177	1090E	5	4	50	52	50.19	3.24		2200.8	2215.9	2198		2195.77		2194.2	2197.1	2192						2219.8	2221.2	2218.6		50.19	3.24	2354.9	2363.5	2240.3
177	1090E	5	4	55	57	50.24	3.38		2203.5	2217.8	2200.2		2197.5		2198.1	2201.3	2195						2221.3	2222.3	2220.5		50.24	3.38	2360.6	2366.9	2244.4
177	1090E	5	4	60	62	50.29	3.42		2206.2	2219.8	2202.9		2201.75		2202.6	2205	2198.6						2222.5	2223.4	2221.7		50.29	3.42	2366.6	2371.2	2249.2
177	1090E	5	4	65	67	50.34	3		2209.9	2222.1	2205.9		2206		2207.4	2211.5	2206.3						2224.1	2225.4	2223.5		50.34	3	2371.8	2376.9	2254.1
177	1090E	5	4	70	72	50.39	3.01		2212.8	2224.4	2208.8		2210.25		2211.5	2213.4	2209						2225.4	2227.4	2224.5		50.39	3.01	2376.1	2383.5	2259
177	1090E	5	4	75	77	50.44	2.96		2216.1	2226.9	2211.8		2214.5		2213.4	2216.2	2212.2						2227	2229.2	2225.9		50.44	2.96	2379.8	2387.8	2266.4
177	1090E	5	4	80	82	50.49	3.28		2219.9	2229.8	2215.1		2218.75		2217.6	2220.9	2215.1						2228.4	2231.6	2227.6		50.49	3.28	2383.5	2391.3	2269.8
177	1090E	5	4	85	87	50.54	2.86		2224.6	2233	2219.3		2223		2224.6	2226.8	2223.8						2230.5	2232.8	2229		50.54	2.86	2387.2	2395.3	2272.7
177	1090E	5	4	100	102	50.69	3.1		2236.1	2238.4	2231.2		2235.75		2234.5	2236	2232.2						2234.3	2236	2232.7		50.69	3.1	2397.3	2404.1	2278.1
177	1090E	5	4	105	107	50.74	3.27		2240	2240	2239.4		2240		2237.9	2238.7	2235.5						2236.4	2238.3	2234.8		50.74	3.27	2400.7	2406.7	2281
																											50.94	2.98	2411.6	2416.2	2293.3
177	1090E	5	4	125	127	50.94	2.98		2297.5	2297.8	2297.5		2295.1		2295	2295.5	2295						2295	2295.4	2295		50.99	2.92	2414.7	2419	2297.3
177	1090E	5	4	130	132	50.99	2.92		2299.3	2301.3	2298.4		2298.57		2298.3	2301	2296.4						2297.4	2302.4	2296.1		51.04	3.02	2417.9	2422.2	2301.9
177	1090E	5	4	135	137	51.04	3.02		2301.9	2304.5	2300.2		2302.03		2301.4	2304.4	2299.1						2300.3	2309.6	2298.6		51.09	3.04	2420.8	2425.3	2305.1
177	1090E	5	4	140	142	51.09	3.04		2304.4	2307.3	2302.4		2305.5		2304.2	2307.1	2301.9						2302.5	2313.1	2300.6		51.19	3.27	2426.5	2433.9	2310.5
177	1090E	5	5	0	2	51.19	3.27		2309.3	2312.8	2305.9		2312.43		2309.6	2311.3	2307.2						2309.5	2319.4	2306.7		51.34	3.36	2435.1	2440.8	2317.7
177	1090E	5	5	15	17	51.34	3.36		2315.8	2320.4	2311.8		2322.83		2316.8	2318.9	2312.1						2318.7	2328.3	2314.9		51.39	3.51	2437.9	2444.2	2320.2
177	1090E	5	5	20	22	51.39	3.51		2318.5	2323.3	2314.6		2326.3		2319.6	2321.2	2314.6						2321.9	2331.5	2317.4		51.44	3.29	2441.1	2447.4	2323.1
177	1090E	5	5	25	27	51.44	3.29		2321.8	2327.1	2317.5		2329.77		2323	2325	2317.3						2325.5	2334.2	2320.5		51.49	3.37	2444.8	2450.2	2327.1
177	1090E	5	5	30	32	51.49	3.37		2325.1	2330.9	2320.5		2333.23		2326.5	2328.7	2319.7						2328.9	2337.3	2323.4		51.54	3.24	2448	2452.8	2330.8
177	1090E	5	5	35	37	51.54	3.24		2329.1	2334.3	2323.5		2336.7		2329.2	2332	2322.4						2332.2	2340.2	2326.8		51.59	3.21	2450.8	2455.4	2334.6
177	1090E	5	5	40	42	51.59	3.21		2332.8	2337.9	2326.9		2340.17		2331.8	2335.3	2325.5						2335.9	2343.2	2330.6		51.69	3.1	2455.4	2460	2347.4
177	1090E	5	5	50	52	51.69	3.1		2340.2	2346.3	2335		2347.1		2336	2342.3	2332.4						2345.1	2350.8	2341.2		51.74	2.99	2458	2462.3	2352.3
177	1090E	5	5	55	57	51.74	2.99		2345.6	2350.6	2340		2350.57		2340.2	2345.6	2336.7						2350.6	2354.3	2345.4		51.79	3.13	2460.8	2464.6	2360
177	1090E	5	5	60	62	51.79	3.13		2351.3	2355.7	2346.7		2354.03		2345.2	2348.9	2342						2356.1	2357.9	2353.7		51.84	3.25	2464.3	2466	2365.5
177	1090E	5	5	65	67	51.84	3.25		2359.9	2360	2359.3		2357.5		2349.9	2351.2	2348.8						2361	2361	2360.7		51.89	2.9	2467.1	2469.1	2370.6
																											51.94	3.19	2469.4	2472.6	2374.9
177	1090E	5	5	70	72	51.89	2.9		2392.5	2392.5	2392.5		2361.81		2392.5	2392.6	2392.5						2391	2391.1	2391		51.98	2.88	2471.7	2475.4	2379.5
177	1090D	6	1	117	119	52.03	3.04		2395.5	2396.1	2392.5		2373.88		2396	2397.4	2395.5						2394.4	2396	2394		52.03	3.04	2474.3	2478	2383
177	1090D	6	1	127	129	52.13	3.14		2397.6	2400	2394.6		2382.5		2399.2	2400.6	2397.9						2400.5	2402.1	2399.6		52.13	3.14	2478.3	2484.3	2392.7
177	1090D	6	1	132	134	52.18	3.33		2398.9	2402.2	2396.7		2388.06		2401.5	2402.5	2400						2403.3	2404.9	2401.6		52.18	3.33	2481.2	2487.5	2396.4
177	1090D	6	1	137	139	52.23	3.56		2401.8	2404.7	2399.3		2393.61		2403.2	2404.4	2401.9						2405.8	2407.5	2404		52.23	3.56	2486	2490.9	2399.6
177	1090D	6	1	142	144	52.28	3.36		2404.7	2407.4	2401.8		2399.17		2404.7	2406.1	2403.7						2408	2409.4	2406.2		52.28	3.36	2490.1	2494.6	2402.1
177	1090D	6	1	147	149	52.33	3.29		2408	2410.8	2404.7		2404.72		2406.1	2408.5	2405.5						2410.2	2412.3	2408.7		52.33	3.29	2494.6	2498.9	2405.6
177	1090D	6	2	2	4	52.38	2.83		2412	2415.9	2408.2		2410.28		2410.4	2413.6	2408.8						2413.6	2415.6	2411.7		52.38	2.83	2499.2	2503.2	2409.3
177	1090D	6	2	7	9	52.43	2.82		2416.7	2421.7	2412.4		2415.83		2417	2419.8	2412.6						2417.2	2419.1	2414.8		52.43	2.82	2503.5	2507.8	2413.6
177	1090D	6	2	12	14	52.48	3.18		2422.8	2428.5	2417.3		2421.39		2422.6	2424.4	2421.3						2421.7	2425.1	2419.6		52.48	3.18	2507.8	2512.1	2418.7
177	1090D	6	2	17	19	52.53	3.28		2428.1	2435.9	2422.9		2426.94		2428	2428.7	2426.3						2428	2430.5	2423.6		52.53	3.28	2512.4	2518.7	2425
177	1090D	6	2	22	24	52.58	3.44		2435	2443.5	2428.2		2432.5		2443.3	2445.2	2429.9						2440.8	2444.6	2429.1		52.58	3.44	2517.8	2529.6	2429.6
177	1090D	6	2	27	29	52.63	3.35		2441.2	2448.6	2434		2437.86		2448.3	2450.4	2443.7						2445.9	2448.7	2440.5		52.63	3.35	2527.3	2534.7	2435.4
177	1090D	6	2	32	34	52.68	3.43		2446.6	2452.5	2439		2443.21		2450.8	2453.5	2447.7						2450.1	2451.6	2445.1		52.68	3.43	2532.4	2538.2	2441.7
177	1090D	6	2	42	44	52.78	2.92		2455.4	2460.8	2449.4		2453.93		2457	2458.8	2454.7						2458	2460.7	2452.9		52.78	2.92	2541.6	2544.7	2454.3
177	1090D	6	2	47	49	52.83	3.05		2459.5	2464.8	2454.6		2459.29		2460	2461.2	2458						2461.9	2463.7	2455.4		52.83	3.05	2545.3	2548.2	2458.6
177	1090D	6	2	52	54	52.88	2.8		2463.7	2468.6	2459.4		2464.64		2463.1	2465.5	2461.4						2465	2467	2458.5		52.88	2.8	2549.3	2553.1	2462.6
177	1090D	6	2	57	59	52.93	2.77		2468.4	2474.3	2464.2		2470		2466.4	2470.2	2464.1						2467.5	2469.8	2461.4		52.93	2.77	2553.1	2558.5	2466.9
177	1090D	6	2	62	64	52.98	3.03		2474.6	2478.6	2469.7		2474.83		2472.5	2475.6	2469						2471	2471.7	2466.2		52.98	3.03	2556.8	2566.5	2472.3
177	1090D	6	2	67	69	53.03	3.31		2480	2486.5	2473.8		2479.67		2478.9	2488.8	2475						2474.2	2478.4	2472.2		53.03	3.31	2561.4	2573.1	2477.5
177	1090D	6	2	72	74	53.08	3.28		2485.4	2493.4	2479.7		2484.5		2491.9	2495.4	2479.4						2478	2494.4	2475.7		53.08	3.28	2566.2	2578.8	2482.6
177	1090D	6	2	82	84	53.18	2.89		2496.7	2501.4	2491.3		2494.17		2501.4	2503.1	2498.9						2499.3	2500.8	2496		53.18	2.89	2576	2586.6	2492.1
177	1090D	6	2	87	89	53.23	3.16		2501.1	2506	2494.4		2499		2504.6	2506.1	2503.8						2501.6	2503.3	2499.3		53.23	3.16	2581.1	2590.9	2496.4
177	1090D	6	2	92	94	53.28	2.9		2505.3	2508.6	2497.6		2503.83		2507.6	2508.7	2506.4						2504	2505.4	2502.1		53.28	2.9	2590.6	2594.3	2500.6
177	1090D	6	2	97	99	53.33	3.35		2509.4	2513.7	2501.6		2508.67		2510.3	2511.9	2508.9						2506.6	2508.1	2505		53.33	3.35	2594.3	2597.7	2506.7
177	1090D	6	2	102	104	53.38	3.17		2513.1	2518.3	2507.9		2513.5		2512.9	2513.7	2510.7						2509.1	2511	2507.7		53.38	3.17	2597.4	2600.9	2510.1
177	1090D	6	2	107	109	53.43	3.39		2517.4	2526.3	2513.4		2518.33		2515.8	2529.7	2513.6						2512.2	2512.5	2511.3		53.43	3.39	2600.3	2604	2515
177	1090D	6	2	112	114	53.48	3.54		2523.3	2530.6	2517.1		2523.17		2530.1	2532.8	2520.3						2525.9	2529.6	2515.7		53.48	3.54	2602.9	2606.9	2521.6
177	1090D	6	2	117	119	53.53	3.28		2529.3	2534.4	2522.4		2528		2534.2	2535.9	2529.3						2532.6	2534	2530.8		53.53	3.28	2605.5	2609.8	2527.3
177	1090D	6	2	122	124	53.58	3.4		2533.6	2537.5	2528		2532.83		2536.8	2538.5	2534.1						2534.8	2536.1	2533.5		53.58	3.4	2608.3	2612.3	2531.9
177	1090D	6	2	127	129	53.63	3.4		2538.1	2540.4	2534		2537.67		2539.1	2540.9	2537.7						2536.7	2537.5	2535.6		53.63	3.4	2611.2	2615.8	2536.7
177	1090D	6	2	132	134	53.68	2.91		2542.5	2542.5	2542.1		2542.5		2542.4	2542.5	2541.9						2543.9	2544	2543.6		53.68	2.91	2614.9	2619.5	2541.6
																											53.73	3.14	2618.3	2622.9	2545.6
177	1090D	6	2	137	139	53.73	3.14		2577.5	2577.9	2577.5		2577.1		NaN	NaN	NaN						NaN	NaN	NaN		53.78	2.82	2621.5	2626.1	2549.9
177	1090D	6	2	142	144	53.78	2.82		2588.1	2589.8	2579.2		2579.9		2577.5	2577.5	2577.5						2577	2577	2577		53.93	2.97	2630.7	2634.4	2568.2
177	1090D	6	3	7	9	53.93	2.97		2593	2596.8	2587.5		2588.32		2590.8	2594.1	2587						2588.7	2591.4	2580.2		54.03	3.19	2636.4	2639.2	2580
177	1090D	6	3	17	19	54.03	3.19		2596.9	2600.9	2593.9		2593.92		2596.5	2597.4	2593.1						2595.4	2598.9	2590.6		54.08	3.27	2639	2641.8	2590.6
177	1090D	6	3	22	24	54.08	3.27		2599.2	2603.3	2596.5		2596.73		2598.3	2598.7	2596.5						2598.9	2601.5	2593.3		54.13	3.39	2641.8	2644.1	2596.3
177	1090D	6	3	27	29	54.13	3.39		2601.3	2606.6	2598.8		2599.53		2600.1	2601.6	2598.9						2601.6	2603.6	2597.8		54.18	3.4	2644.4	2646.4	2599.7
177	1090D	6	3	32	34	54.18	3.4		2603.4	2609.8	2600.7		2602.33		2602	2604.7	2600.6						2603.9	2605.3	2601.8		54.23	3.74	2647.3	2648.7	2602
177	1090D	6	3	37	39	54.23	3.74		2605.9	2614.1	2602.9		2605.14		2603.7	2608.2	2602.8						2606.2	2606.5	2605.3		54.28	2.93	2649.8	2651.8	2604.6
177	1090D	6	3	42	44	54.28	2.93		2612	2617.5	2605		2607.94		2613.9	2616.1	2608.9						2609.8	2616.3	2607.7		54.48	2.66	2656.1	2661	2616.1
177	1090D	6	3	62	64	54.48	2.66		2623.4	2626.7	2613.9		2619.16		2623.3	2625.3	2620.4						2623.9	2628.6	2616.8		54.53	2.6	2658.4	2663.6	2621.8
177	1090D	6	3	67	69	54.53	2.6		2626.4	2629.9	2615.9		2621.96		2625.8	2627.3	2623						2627.1	2633.1	2618.7		54.58	2.96	2661	2666.5	2624.1
177	1090D	6	3	72	74	54.58	2.96		2628.6	2633	2618.5		2624.77		2627.8	2628.8	2625.1						2630.1	2636.3	2621.2		54.63	2.71	2663.6	2668.7	2626.6
177	1090D	6	3	77	79	54.63	2.71		2630.5	2635.9	2621.7		2627.57		2629.6	2631	2627.1						2632.8	2638.9	2623.7		54.78	3.13	2669.9	2676.8	2633.5
177	1090D	6	3	92	94	54.78	3.13		2637.4	2641.6	2631.1		2635.98		2634.7	2637.1	2632.5						2641.2	2647.9	2631.9		54.88	3.07	2674.8	2681.9	2639.2
177	1090D	6	3	102	104	54.88	3.07		2642.3	2646	2636.6		2641.59		2638.3	2643.1	2636.6						2647.6	2653.9	2641.4		54.93	3.29	2677.3	2684.8	2643
177	1090D	6	3	107	109	54.93	3.29		2645	2648.4	2639.6		2644.39		2643.1	2648.4	2640.7						2650.9	2657.4	2645.3		54.98	2.94	2679.9	2688.8	2646.4
177	1090D	6	3	112	114	54.98	2.94		2647.8	2651.1	2642.3		2647.2		2649.8	2652.6	2648.8						2654.2	2660.7	2652.6		55.03	3.04	2682.2	2690.2	2649.3
177	1090D	6	3	117	119	55.03	3.04		2650.6	2653.8	2645.3		2650		2652.9	2655.9	2650.8						2657.4	2663.7	2654.9		55.18	2.8	2690.2	2694.8	2655.6
177	1090D	6	3	132	134	55.18	2.8		2658.9	2666.1	2652		2659.38		2660.4	2666.6	2656						2665	2670.3	2660.6		55.43	2.74	2701.7	2703.7	2667.9
177	1090D	6	4	7	9	55.43	2.74		2670.8	2679.6	2664.4		2675		2673.2	2676.2	2668						2677.7	2680.9	2670.4		55.53	2.99	2705.7	2709.7	2675.6
177	1090D	6	4	17	19	55.53	2.99		2678.5	2690.4	2671.8		2681.25		2679.2	2682.6	2676.7						2682.8	2685.7	2679.7		55.58	3.14	2708.5	2712.3	2679.3
177	1090D	6	4	22	24	55.58	3.14		2682.8	2694.3	2676.9		2684.38		2682.6	2686	2681.3						2685.7	2693.2	2682.9		55.63	3.17	2711.1	2715.1	2683.6
177	1090D	6	4	27	29	55.63	3.17		2687.6	2697.9	2682.1		2687.5		2685.9	2690.3	2684.1						2690.9	2696.5	2685.9		55.68	3.03	2713.7	2717.7	2690.5
177	1090D	6	4	32	34	55.68	3.03		2692.5	2701.1	2687.3		2701.11		2689.4	2692.5	2688.8						2694.9	2698.7	2692.8		55.73	3.13	2716.9	2720	2695.1
177	1090D	6	4	37	39	55.73	3.13		2696.8	2705	2691.6		2714.72		2691.7	2694.5	2690.1						2698.5	2701.2	2696.2		55.78	2.96	2720	2720	2698.8
177	1090D	6	4	42	44	55.78	2.96		2700.6	2709.3	2695.4		2728.33		2693.5	2696	2691.8						2701.7	2703.3	2698.5		56.08	3.18	2720	2720	2719.4
177	1090D	6	4	72	74	56.08	3.18		2720	2720	2719.6		2810		2700	2700	2699.8						2718.2	2719.4	2717.5
177	1090D	6	4	82	84	56.18	2.89		2832.6	2833	2832.5		2825.51		NaN	NaN	NaN						2832.4	2833.5	2832		56.18	2.89	2832.6	2833	2832.5
177	1090D	6	4	92	94	56.28	2.7		2852.6	2857	2835		2841.02		2832.5	2832.5	2832.5						2855.8	2857.4	2836.6		56.28	2.7	2852.6	2857	2835
177	1090D	6	4	97	99	56.33	2.86		2857	2862.4	2837.5		2848.78		2834.2	2835.5	2833.8						2862.4	2868	2839.1		56.33	2.86	2857	2862.4	2837.5
177	1090D	6	4	102	104	56.38	2.82		2861	2866.9	2839.9		2856.53		2836.2	2837.5	2835						2868	2873.4	2841.9		56.38	2.82	2861	2866.9	2839.9
177	1090D	6	4	107	109	56.43	2.75		2864.8	2870.9	2843.2		2864.29		2838.3	2839.8	2836.9						2873.5	2877.1	2844.6		56.43	2.75	2864.8	2870.9	2843.2
177	1090D	6	4	112	114	56.48	2.83		2869.1	2874.6	2846.3		2872.04		2841	2845.4	2838.7						2878.6	2880.7	2848.2		56.48	2.83	2869.1	2874.6	2846.3
177	1090D	6	4	117	119	56.53	3.19		2872.1	2878.5	2849.7		2879.8		2847.1	2848.7	2841.9						2882	2884.4	2852.3		56.53	3.19	2872.1	2878.5	2849.7
177	1090D	6	4	142	144	56.78	2.92		2881.5	2888.6	2864.5		2885.33		2864.1	2869.1	2855.4						2889.7	2891.4	2871.4		56.78	2.92	2881.5	2888.6	2864.5
177	1090D	6	4	147	149	56.83	2.95		2883.9	2890.8	2867.9		2886.44		2867.8	2873.4	2858.2						2891.7	2893.2	2873.8		56.83	2.95	2883.9	2890.8	2867.9
177	1090D	6	5	37	39	57.23	2.91		2897.4	2899.6	2890		2895.29		2893.8	2896.2	2888.7						2898.9	2900.2	2893.6		57.23	2.91	2897.4	2899.6	2890
177	1090D	6	5	42	44	57.28	2.94		2899.8	2901.4	2894		2896.39		2898.9	2900.5	2893.9						2901	2902	2897.7		57.28	2.94	2899.8	2901.4	2894
177	1090D	6	5	47	49	57.33	2.8		2902.5	2902.5	2902.2		2897.5		2902.5	2902.5	2902						2903	2903	2902.9		57.33	2.8	2902.5	2902.5	2902.2

## Sheet: TableS7_980_981_alignments
Table S7: ODP Site 980/981 Alignments of benthic foraminiferal δ18O
ODP Site 980/981 Benthic foraminferal δ18O values are from McManus et al. (1999), Flower et al. (2000), Oppo et al. (1998), and Raymo et al. (2004).
HMM-Match-based alignments generated using the automated probabilistic HMM-Match algorithm of Lin et al. (2014) and user defined tie points listed in Table 1. Manual alignment based on the user-defined tie points in Table S5.
Alignment targets refer to Prob-stack (Ahn et al., 2017), LR04 (Lisiecki and Raymo, 2005), LR09 Pacific (Lisiecki and Raymo, 2009), and CENOGRID (Westerhold et al. 2020).
				HMM-Match Alignment to Prob-stack				Manual Alignment to LR04		HMM-Match Alignment to LR04				HMM-Match Alignment to LR09 Atlantic				HMM-Match Alignment to CENOGRID
ODP Site	depth (mcd)	d18O		Output age (ka)	95% Confidence Upper Age Limit (ka)	95% Confidence Lower Age Limit (ka)		interpolated age (ka)		Output age (ka)	95% Confidence Upper Age Limit (ka)	95% Confidence Lower Age Limit (ka)		Output age (ka)	95% Confidence Upper Age Limit (ka)	95% Confidence Lower Age Limit (ka)		Output age (ka)	95% Confidence Upper Age Limit (ka)	95% Confidence Lower Age Limit (ka)
980	0.01	2.63		0	0	0		0		0	0	0		0	0	0		0	0	0
980	0.06	2.73		0.2	0.3	0.2		0.2		0.2	0.2	0.2		0.2	0.2	0.2		0.2	0.2	0.2
980	0.21	2.25		0.6	0.9	0.6		0.8		0.6	0.6	0.6		0.6	0.7	0.6		0.6	0.6	0.6
980	0.24	2.7		0.8	1.1	0.7		0.92		0.7	0.7	0.7		0.7	0.8	0.7		0.7	0.8	0.7
980	0.26	2.72		0.8	1.1	0.7		1		0.7	0.7	0.7		0.7	0.8	0.7		0.7	0.8	0.7
980	0.29	2.64		1	1.3	0.8		1.12		0.8	0.8	0.8		0.7	0.8	0.7		0.8	0.9	0.8
980	0.31	2.6		1.1	1.4	0.9		1.2		0.8	0.8	0.8		0.7	0.9	0.7		0.8	0.9	0.8
980	0.36	2.45		1.3	1.7	1.1		1.4		1	1	1		1	1.1	0.9		1	1.1	1
980	0.39	2.78		1.4	1.8	1.2		1.52		1	1	1		1	1.1	0.9		1	1.1	1
980	0.41	2.31		1.5	1.9	1.2		1.6		1	1	1		1	1.1	0.9		1	1.1	1
980	0.46	2.47		1.7	2.2	1.5		1.8		1.2	1.2	1.2		1.2	1.3	1.1		1.2	1.3	1.2
980	0.49	2.53		1.9	2.4	1.6		1.92		1.3	1.3	1.3		1.2	1.3	1.1		1.3	1.4	1.3
980	0.51	2.63		1.9	2.4	1.6		2		1.3	1.3	1.3		1.2	1.3	1.1		1.3	1.4	1.3
980	0.61	2.39		2.3	2.8	2		2.4		1.6	1.6	1.6		1.5	1.6	1.4		1.6	1.7	1.6
980	0.66	2.5		2.5	3	2.1		2.6		1.7	1.7	1.7		1.6	1.7	1.6		1.7	1.8	1.7
980	0.74	2.39		2.8	3.3	2.4		2.92		1.9	1.9	1.9		1.8	2	1.8		1.9	2	1.9
980	0.76	2.4		2.9	3.4	2.5		3		1.9	1.9	1.9		1.8	2	1.8		1.9	2	1.9
980	0.81	2.45		3.2	3.7	2.8		3.2		2.1	2.1	2.1		2	2.2	2		2.1	2.2	2.1
980	0.86	2.59		3.4	3.9	2.9		3.4		2.2	2.2	2.2		2.1	2.3	2.1		2.3	2.3	2.2
980	0.96	2.52		3.7	4.3	3.2		3.8		2.5	2.5	2.5		2.4	2.6	2.4		2.6	2.6	2.5
980	1.01	2.5		3.9	4.5	3.4		4		2.7	2.8	2.6		2.5	2.8	2.5		2.7	2.7	2.6
980	1.06	2.6		4.2	4.8	3.7		4.2		2.9	3.1	2.8		2.8	3	2.7		2.9	2.9	2.8
980	1.16	2.56		4.6	5.1	4		4.6		3.2	3.4	3.1		3.1	3.3	3		3.2	3.2	3.1
980	1.19	2.56		4.8	5.3	4.2		4.72		3.4	3.6	3.2		3.2	3.3	3		3.3	3.3	3.2
980	1.24	2.48		5	5.5	4.3		4.92		3.5	3.8	3.4		3.4	3.5	3.3		3.4	3.4	3.3
980	1.26	2.52		5	5.6	4.4		5		3.6	3.9	3.4		3.5	3.5	3.4		3.4	3.4	3.3
980	1.29	2.73		5.2	5.8	4.6		5.12		3.8	4.1	3.6		3.6	3.7	3.6		3.5	3.5	3.4
980	1.36	2.66		5.5	6.1	4.8		5.4		4.2	4.4	3.8		4	4.2	3.8		3.7	3.7	3.6
980	1.41	2.45		5.8	6.4	5.1		5.6		4.6	4.6	4		4.2	4.5	4		3.9	3.9	3.8
980	1.46	2.69		6	6.6	5.3		5.8		4.7	4.7	4.2		4.5	4.7	4.2		4	4	3.9
980	1.51	2.7		6.3	6.9	5.5		6		4.9	4.9	4.4		4.8	5.1	4.5		4.2	4.2	4.1
980	1.56	2.69		6.6	7.2	5.8		6.2		5.1	5.1	4.6		5.1	5.3	4.8		4.4	4.4	4.3
980	1.66	2.56		7	7.6	6.2		6.6		5.4	5.4	5		5.6	5.8	5.6		4.7	4.7	4.6
980	1.69	2.53		7.2	7.7	6.4		6.72		5.5	5.5	5.1		5.8	5.9	5.7		4.8	4.8	4.7
980	1.71	2.53		7.2	7.8	6.4		6.8		5.5	5.5	5.1		5.9	6	5.7		4.8	4.8	4.7
980	1.76	2.7		7.5	8	6.7		7		5.7	5.9	5.3		6	6.2	5.8		5	5	4.9
980	1.79	2.63		7.7	8.2	6.9		7.12		5.9	6.1	5.5		6.2	6.4	6		5.1	5.1	5
980	1.86	2.6		8	8.5	7.2		7.4		6.2	6.4	5.8		6.5	6.7	6.2		5.3	5.3	5.2
980	1.91	2.69		8.3	8.9	7.4		7.6		6.4	6.7	6.1		6.6	6.8	6.4		5.5	5.5	5.4
980	1.94	2.79		8.4	9	7.5		7.72		6.5	6.7	6.2		6.8	7	6.6		5.5	5.5	5.4
980	1.96	2.69		8.4	9.1	7.6		7.8		6.5	6.9	6.3		6.9	7.1	6.7		5.5	5.5	5.4
980	2.06	2.76		8.9	9.5	8		8.2		7	7.3	6.7		7.2	7.4	7		5.8	5.9	5.7
980	2.11	2.7		9.2	9.8	8.3		8.4		7.3	7.5	7		7.4	7.5	7.2		6	6.1	6
980	2.16	2.78		9.5	10.2	8.6		8.6		7.5	7.8	7.3		7.7	7.8	7.5		6.2	6.3	6.2
980	2.46	2.77		10.3	11	9.4		9.8		8.4	8.5	8.1		8.5	8.5	8.3		6.9	7	6.9
980	2.86	2.71		11.4	12.1	10.5		11.4		9.5	9.5	9.3		9.5	9.5	9.3		8	8	7.9
980	2.96	2.9		11.9	12.5	11		11.8		10.2	10.4	10		10.3	10.4	9.9		8.3	8.3	8.2
980	3.01	3.36		12.2	12.8	11.3		12		10.6	10.9	10.6		10.6	10.8	10.6		8.5	8.5	8.4
980	3.06	3.53		12.5	13.1	11.6		12.297		10.9	11.2	10.8		11	11.3	10.8		8.6	8.6	8.6
980	3.16	3.26		13	13.6	12.1		12.8911		11.6	11.7	11.6		11.6	11.7	11.4		8.9	8.9	8.9
980	3.26	3.37		13.5	14.2	12.6		13.4851		11.9	12	11.9		11.9	12	11.8		9.2	9.2	9.2
980	3.36	3.35		14.1	14.8	13.1		14.0792		12.3	12.3	12.2		12.3	12.3	12.1		9.5	9.5	9.5
980	3.46	3.53		14.6	15.3	13.5		14.6733		12.6	12.6	12.6		12.6	12.6	12.6		10.1	10.3	9.8
980	3.56	3.4		15.3	15.9	14		15.2673		12.9	12.9	12.9		12.9	12.9	12.9		10.7	11	10.6
980	3.66	3.66		15.9	16.5	14.6		15.8614		13.2	13.2	13.2		13.2	13.2	13.2		11.2	11.6	10.9
980	3.76	3.19		16.6	17.2	15.2		16.4554		13.5	13.5	13.5		13.5	13.5	13.5		11.7	12	11.6
980	3.86	3.81		17.2	17.9	15.8		17.0495		14.1	14.3	13.8		14.7	14.9	13.9		12.1	12.3	11.9
980	3.92	3.72		17.6	18.4	16.2		17.4059		14.5	14.5	14.2		15.4	15.5	14.3		12.5	12.5	12.3
980	4.02	4.63		18.3	19.2	16.8		18		16.7	17	16.6		16.7	17.6	16.6		13.6	14.1	12.9
980	4.21	4.6		19.5	20.5	17.9		19.3122		17.6	17.8	17.6		17.8	18.2	17.3		14.7	15.7	13.8
980	4.42	4.61		20.7	22	19.1		20.7626		18.1	18.3	18.1		18.6	18.9	17.9		15.8	16.9	14.8
980	4.62	4.5		21.9	23.2	20.3		22.1439		18.7	18.8	18.6		19.2	19.5	18.5		16.9	18	15.7
980	4.82	4.43		23.3	24.6	21.5		23.5252		19.2	19.3	19.1		19.8	20	19		18	19.2	16.7
980	5.02	4.46		24.6	26	22.6		24.9065		19.8	19.8	19.6		20.4	20.5	19.6		19.1	20.3	17.8
980	5.32	4.5		26.6	28	24.3		26.9784		20.5	20.5	20.4		21.3	22.2	20.4		20.5	21.8	19.2
980	5.92	4.13		30	32.2	27.6		31.1223		23.7	24.2	23.6		24.1	25.6	23.6		23.4	25.3	21.9
980	6.12	4.29		31.4	33.7	28.9		32.5036		24.5	25.2	24.2		25.3	26.2	25		24.7	26.7	23.3
980	6.32	3.91		32.9	35.5	30.2		33.8849		25.7	26	25.6		26.7	27.2	26.6		26	28.1	24.6
980	6.52	4.03		34.3	37.6	31.5		35.2662		26.4	26.9	26.1		27.5	28.4	27.2		27.3	29.5	25.8
980	6.62	4.11		35	38.9	32.3		35.9568		26.9	27.6	26.5		28.2	29	27.9		28.1	30.4	26.6
980	6.82	4.03		36.3	40.9	33.7		37.3381		27.5	28.9	27.2		29.6	30	29.6		29.3	32	27.8
980	7.02	4.24		37.6	43.3	35.1		38.7194		29	29.5	28		30.4	30.5	30.1		30.6	33.6	29.2
980	7.22	4.08		39	45.3	36.7		40.1007		31	32.4	29.7		32.2	36.3	31.3		32.5	35.2	30.5
980	7.42	3.98		40.2	47.3	38.8		41.482		34.1	35.5	31.9		35.6	39.5	33.6		34.2	37	31.9
980	7.62	3.65		41.4	49.2	40.5		42.8633		37.9	38.5	37.6		40.8	41.4	40.6		36.1	38.8	33.2
980	7.82	4.01		42.9	51.1	41.7		44.2446		39.7	40.4	39		42.1	43.2	41.5		38	40.7	34.3
980	8.02	4.1		44.4	52.5	42.9		45.6259		41	41.5	40.6		43.3	44.9	42.7		39.5	42.4	35.6
980	8.12	3.88		45.1	53.1	43.6		46.3165		41.7	42.4	41.1		44.1	46	43.4		40.3	43.4	36.3
980	8.52	3.87		47.8	55.8	45.9		49.0791		44	44.5	43		46.8	49.1	44.9		43.2	46.2	38.9
980	8.92	3.8		50.3	58.3	48.3		51.8417		46.6	47.4	45.4		49.6	51.5	46.7		45.8	48.6	41.1
980	9.12	4.01		52	59.7	50		53.223		48.1	48.8	47.6		50.8	53.3	48		47.3	50	42.4
980	9.32	3.83		53.8	61.2	51.4		54.6043		50.3	51.5	48.4		52	55.2	49.3		48.8	51.3	43.8
980	9.52	3.88		55.6	62.8	52.9		55.9856		52.7	53.4	49.4		53.4	56.9	51		50.3	52.6	45.3
980	9.62	3.87		56.7	63.8	53.9		56.6763		53.5	54.4	51.3		54.1	57.6	52		51.2	53.5	46.1
980	9.82	3.76		58.7	65.3	55.4		58.0576		55	56.5	53.8		55.9	58.6	54.6		52.7	55.4	47.6
980	10.02	3.75		60.6	67.8	56.8		59.4388		56.5	59.3	55.4		58.2	59.5	56.2		54.1	57.8	49.2
980	10.22	4.01		62.9	69.9	58.5		60.8201		59.9	62	57.7		60.4	61.5	59.6		55.5	60.6	50.8
980	10.37	3.93		64.4	71.6	59.7		61.8561		61.5	63	59.2		62.1	62.8	61.2		56.5	63	52.2
980	10.57	3.73		66.8	73.1	61.9		63.2374		63.7	64	61.4		63.6	64	63.6		57.8	67.7	54.3
980	10.77	3.67		69.2	74.5	64.2		64.6187		64.5	64.5	64.1		64.5	64.5	64.2		59.4	69.1	56.8
980	10.97	4.19		71.9	75.5	66.8		66		66.1	66.5	65.6		66.3	68.4	65.3		64.9	70.4	61.4
980	11.17	3.74		74.7	77.8	70.7		68.6791		69.7	70.5	67.5		70.4	71.4	67.9		70.2	72.5	67.7
980	11.37	3.77		77.3	79.7	73.6		71.3583		72.6	73	70.2		72.7	73.5	71.2		73.6	75.1	70.9
980	11.42	3.65		78	80.4	74.3		72.028		73.2	73.5	71		73.4	74.4	72.4		74.6	76.1	71.8
980	11.47	3.44		78.6	80.8	75.1		72.6978		73.8	74.5	71.5		74.8	75.5	73.8		75.3	76.9	72.6
980	11.67	3.34		80.5	82.8	77.7		75.3769		75.5	80.1	74.7		79.6	80.6	78.6		77.9	80.1	75.9
980	11.87	3.31		82.2	84.5	79.7		78.0561		79.9	81.5	78.6		81	82	79.9		80.1	82.3	78.1
980	12.07	3.26		83.7	86.1	81.7		80.7352		81.6	83	80.4		82.3	83.3	81.1		82.1	84	79.9
980	12.27	3.23		85.5	87.6	83.4		83.4143		83	84.3	81.7		83.5	84.4	82.2		84.1	85.8	81.8
980	12.47	3.18		87.3	89.2	85.1		86.0935		84.4	85.5	83.5		85.1	85.5	83.4		86.3	88.1	84
980	12.67	3.9		89.3	90.9	87.1		88.7726		86.6	87.1	86.6		86.7	87.1	86.6		90.3	92.1	89
980	12.82	3.51		91	92.5	88.9		90.7819		87.2	88	87		87.5	88	87.1		94.1	95.4	91.9
980	12.92	3.76		92.1	93.5	89.9		92.1215		87.8	88.5	87.4		88.1	88.5	87.6		95.8	97	93.1
980	12.97	3.66		92.9	94.4	90.8		92.7913		88.3	90	87.7		88.5	89.3	88.1		96.6	98.2	94
980	13.07	3.49		94.2	96.1	92.1		94.1308		89.6	91.4	88.6		90.1	91.7	88.9		98.3	100.3	96.1
980	13.27	3.36		96.7	99.4	94.7		96.81		92.7	98.2	91.6		93.5	96.6	92.2		101.9	105.6	99.8
980	13.37	3.28		98	100.9	95.8		98.1495		94.2	100.5	93.2		95.4	98	93.7		103.5	107	101.5
980	13.57	3.36		100.5	104	98.2		100.829		101.1	104.6	99.9		101	103.9	99.6		107.8	110.6	104.8
980	13.77	3.59		103.1	106.6	101.1		103.508		106.8	107.7	106.2		106.7	107.9	103.7		111.1	113.5	108.9
980	13.97	3.54		106	109	103.5		106.187		107.9	108.6	107.4		108.3	109.6	106		113.4	115.8	111.7
980	14.14	3.54		108.4	111	106		108.464		108.9	109.3	108.3		109.7	110.7	107.6		115.7	117.8	113.7
980	14.18	3.7		109.1	111.6	106.6		109		109.3	109.5	108.6		110	111	108		116.3	118.3	114.3
980	14.29	3.58		110.6	112.8	108.1		109.574		110.2	110.7	109.3		111.2	111.5	109.2		117.7	119.3	116.1
980	14.33	3.3		111	113.2	108.7		109.782		110.6	111.2	109.6		111.6	111.8	109.9		118.2	119.6	116.6
980	14.41	3.4		112.1	113.9	110.2		110.199		111.5	112.3	110.6		112	112.2	111.1		119.4	120.4	117.8
980	14.44	3.39		112.5	114.2	110.7		110.356		111.9	112.7	111		112.2	112.5	111.6		119.9	120.7	118.3
980	14.48	3.37		112.9	114.6	111.2		110.564		112.3	113.1	111.5		112.4	112.7	112.1		120.3	120.9	118.7
980	14.52	3.28		113.5	115	111.8		110.773		112.8	113.5	112.6		112.8	113	112.6		120.7	121.2	119.3
980	14.59	3.4		114.3	115.6	112.8		111.138		113.5	114.2	113.1		113.4	113.5	113		121.3	121.5	120.1
980	14.68	3.26		115.3	116.6	114.4		111.607		115.1	115.3	114.4		114.4	115	114.1		122.1	122.4	121.3
980	14.71	3.21		115.6	116.8	114.6		111.764		115.5	115.5	114.9		115.3	115.5	114.8		122.3	122.5	121.5
980	14.72	3.18		115.7	116.9	114.7		111.816		115.8	115.9	115.1		115.3	115.5	114.8		122.4	122.6	121.6
980	14.74	2.57		115.9	117.2	114.9		111.92		116.6	116.7	115.6		115.6	115.9	115.6		122.6	122.8	121.8
980	14.86	2.93		116.8	118.1	115.7		112.546		117.1	117.4	116.6		116.5	117.1	116		123	123.4	122.5
980	14.89	2.96		117	118.3	115.9		112.702		117.3	117.6	116.8		116.7	117.4	116.2		123.2	123.6	122.7
980	14.93	2.89		117.3	118.6	116.2		112.911		117.5	117.8	117		116.9	117.7	116.4		123.4	123.8	122.9
980	15.19	2.79		118.7	119.6	117.4		114.267		118.3	118.7	117.9		118.1	118.9	117.6		124.1	124.4	123.6
980	15.41	2.65		119.7	120.6	118.4		115.414		118.9	119.6	118.6		119.1	119.7	118.6		124.6	125	124.1
980	15.47	2.7		120.2	121.1	118.9		115.727		119.3	119.9	119		119.4	120	118.9		124.9	125.3	124.5
980	15.57	2.69		120.8	121.7	119.4		116.248		119.9	120.4	119.4		120	120.3	119.6		125.3	125.6	124.9
980	15.61	2.71		121.2	122	119.7		116.457		120.1	120.6	119.7		120.3	120.5	119.9		125.5	125.8	125.1
980	15.64	2.72		121.4	122.2	119.9		116.613		120.3	120.8	119.9		120.4	120.6	120.1		125.6	126	125.2
980	15.68	2.62		121.7	122.5	120.1		116.822		120.6	121	120.2		120.7	120.9	120.4		125.8	126.1	125.4
980	15.72	2.51		122	122.7	120.4		117.031		120.8	121.2	120.5		120.9	121.1	120.6		126	126.3	125.6
980	15.79	2.62		122.3	123.2	120.8		117.396		121.2	121.6	120.8		121.2	121.5	121		126.2	126.6	125.8
980	15.94	2.56		123	123.9	121.6		118.178		121.7	122.1	121.6		121.8	122.1	121.6		126.7	127	126.3
980	16.09	2.65		123.7	124.7	122.2		118.96		122.3	122.5	122		122.3	122.6	122		127.1	127.4	126.7
980	16.24	2.49		124.6	125.3	122.9		119.742		122.8	123.1	122.6		122.8	123.1	122.6		127.6	127.8	127.2
980	16.39	2.47		125.2	126	123.5		120.525		123.3	123.5	123		123.3	123.5	123		128	128.2	127.6
980	16.68	2.54		126.1	127	124.8		122.037		124.1	124.7	123.8		124	124.4	123.7		128.7	128.9	128.3
980	16.88	2.51		127	127.9	125.7		123.08		124.7	125.3	124.6		124.7	125.1	124.3		129.2	129.4	128.8
980	16.99	2.51		127.5	128.5	126.3		123.653		125	125.6	124.9		125.1	125.6	124.7		129.5	129.7	129.1
980	17.14	2.44		128.4	129.3	127.2		124.436		125.5	126.1	125.3		125.6	126.1	125.3		129.9	130.1	129.5
980	17.29	2.48		129.3	130	128.2		125.218		126	126.5	125.8		126.4	126.5	125.9		130.4	130.5	129.9
980	17.44	2.58		130.2	130.9	129.3		126		126.5	127.5	126.3		127.3	127.5	126.7		131.1	131.5	130.5
980	17.59	3.49		131.2	132	130.4		127.533		129.1	131.7	128.6		131.2	132.1	130.6		131.9	132.4	131.6
980	17.74	3.98		132.3	133.3	131.6		129.066		132.6	133	132.6		132.7	133.1	132.6		132.8	133.2	132.6
980	17.82	3.88		133	134	132.1		129.883		133.5	133.5	133.2		133.4	133.5	133		133.3	133.5	133
980	17.9	4.31		133.7	134.7	132.8		130.701		134.9	135.8	134.6		134.1	134.7	133.6		133.9	134.2	133.6
980	17.96	4.2		134.2	135.1	133.3		131.314		135.7	136.7	135.1		134.7	135.2	134.1		134.3	134.7	133.9
980	18.03	4.28		134.7	135.6	134		132.029		136.7	137.3	135.6		135.2	135.5	134.8		134.8	135.3	134.4
980	18.1	4.54		135.2	136.1	134.4		132.745		137.4	137.8	136.1		135.6	136	135.6		135.2	135.8	134.8
980	18.18	4.51		135.7	136.6	135		133.562		137.9	138.3	136.7		136.1	136.4	135.9		135.7	136.3	135.3
980	18.25	4.55		136.2	137.1	135.5		134.277		138.3	138.6	137.5		136.5	136.8	136.2		136.2	136.8	135.7
980	18.32	4.57		136.7	137.5	135.9		134.993		138.6	138.8	137.8		136.9	137.2	136.5		136.6	137.2	136.1
980	18.4	4.47		137.2	138	136.5		135.81		138.9	139.1	138.3		137.4	137.5	137		137.2	137.7	136.6
980	18.47	4.34		137.6	138.4	136.9		136.526		139.1	139.3	138.7		138.1	138.8	137.5		137.6	138.1	136.9
980	18.54	4.34		138	138.8	137.4		137.241		139.4	139.5	139.1		138.7	139.3	138.2		138	138.6	137.4
980	18.61	4.53		138.5	139.3	137.8		137.956		139.6	139.7	139.6		139.2	139.6	138.9		138.6	139	137.9
980	18.67	4.68		138.9	139.6	138.2		138.569		139.8	139.9	139.8		139.6	139.9	139.6		138.9	139.4	138.2
980	18.74	4.62		139.4	140.1	138.7		139.285		140.1	140.1	140		139.9	140.1	139.8		139.3	139.8	138.6
980	18.81	4.71		139.8	140.5	139.1		140		140.3	140.3	140.2		140.2	140.3	140		139.7	140.2	139
980	18.88	4.58		140.3	141.1	139.6		140.99		140.5	140.5	140.4		140.5	140.5	140.3		140.1	140.6	139.4
980	18.95	4.42		140.7	141.5	140		141.979		140.9	141.1	140.7		140.9	141.1	140.5		140.5	141	139.7
980	19.22	4.6		142	143.5	141.1		145.796		142.2	142.5	141.6		141.6	141.8	141.3		141.4	142.2	140.5
980	19.46	4.61		143.1	145.3	142.1		149.188		143.7	144.2	142.4		142.3	142.4	142		142.2	143.1	141.3
980	19.6	4.35		144	146.5	142.9		151.168		144.5	145.1	143.1		142.6	142.8	142.4		142.9	143.9	142.1
980	19.75	4.37		144.9	147.8	143.7		153.288		145.6	146.1	143.8		143.1	143.2	142.9		143.6	144.6	142.8
980	19.88	4.46		145.5	149.1	144.6		155.126		146.6	146.9	144.3		143.4	143.5	143.2		144.3	145.4	143.5
980	19.9	4.53		145.7	149.3	144.8		155.408		146.8	147	144.5		143.5	143.5	143.3		144.4	145.5	143.6
980	20.11	4.43		147.5	151.1	145.9		158.377		147.5	147.5	146.8		145.6	147	144.1		145.5	147.3	144.5
980	20.31	4.28		149.5	152.8	147.1		161.204		148.8	149.3	148.2		147.6	148.5	145.6		147.2	148.9	145.9
980	20.51	4.34		151	154.3	148.4		164.031		150	150.5	149.6		149.6	150.1	146.9		149.1	150.2	147.1
980	20.72	3.84		152.6	155.7	149.5		167		151.3	152.1	150.7		150.7	151.3	149.9		150.7	151.7	148.2
980	20.9	3.92		154	157.3	150.9		168.2		152.8	154.7	151.8		151.5	152.5	151		151.8	152.7	149.2
980	21.1	3.99		155.6	158.7	152.2		169.533		154.8	155.5	153.2		152.4	154.8	151.9		152.9	153.7	150.6
980	21.25	4.2		156.9	159.9	153.3		170.533		156.6	158.9	155.7		153.4	156.2	152.8		153.8	154.8	151.5
980	21.38	4.05		158.2	161.2	154.2		171.4		158.6	160.9	157.6		154.7	157.2	153.8		154.7	156	152.8
980	21.4	4.1		158.5	161.4	154.5		171.533		159	161.1	157.9		154.8	157.3	153.9		154.8	156.3	153
980	21.5	4.25		159.7	162.5	155.9		172.2		160.2	161.9	159.3		156.7	158	155.6		155.4	157.3	153.7
980	21.7	4.38		161.7	164.3	158.2		173.533		162.7	163.2	162.6		158.8	159.4	158.6		156.4	159.8	154.7
980	21.9	4.26		163.3	166.8	160.5		174.867		163.5	164.4	163.1		160.3	160.5	159.4		158.1	162	155.9
980	22.1	4.08		165.2	169.1	162.7		176.2		164.9	165.3	164.3		162.4	164.3	161		160.5	164.2	157.4
980	22.15	4.06		165.7	169.6	163.2		176.533		165.3	165.5	164.8		163.1	165.1	161.4		161.1	164.9	157.8
980	22.2	3.92		166.4	170.9	163.9		176.867		166	167	165.6		163.9	166	162		162	165.8	158.5
980	22.4	4.05		169	173.1	165.5		178.2		170.8	171.5	168.6		166.3	170.6	164.3		165	168.6	160.8
980	22.6	3.81		171.7	175.6	167.1		179.533		173.4	176.3	172.6		172.4	175.2	166.7		168.6	171.8	162.8
980	22.8	3.9		174.6	178.2	169		180.867		177	178.2	175.9		176.8	178.7	168.2		172	174.5	165.2
980	23	4.14		177.6	180.3	170.5		182.2		179	179.5	178.6		179.6	179.9	170.6		175.2	177.1	167.4
980	23.2	3.91		180.6	182.5	172.2		183.533		180.8	182.1	179.9		180.2	180.5	176		177.7	179.8	170.3
980	23.4	4.04		182.9	184.1	174.1		184.867		182.4	183.8	181.7		181	181.4	179.7		180	181.7	173
980	23.6	4.29		184.7	185.4	176.3		186.2		184.6	184.6	184.6		181.8	182.1	181.6		181.9	183.5	175.6
980	23.65	4.22		185.2	186	177.1		186.533		184.8	184.8	184.8		182.2	182.4	181.9		182.5	184.1	176
980	23.7	4.11		185.6	186.7	177.9		186.867		185	185	185		182.4	182.5	182.2		183	184.6	176.7
980	23.9	4.2		187	188.5	180.3		188.2		185.5	185.5	185.5		183.8	184.3	183.6		184.4	185.8	180
980	24.1	4.09		188.3	191.1	184.4		189.533		186.5	187.8	186		185.1	185.5	184.4		185.9	187.1	182.9
980	24.3	3.99		190.5	193.3	187.1		190.867		188.3	188.5	187.6		186.4	187.5	185.4		187.5	188.5	185.9
980	24.5	3.43		193	195.4	189.9		192.2		191.2	193.2	190.6		191.7	193.4	190.6		190.1	192.3	188.7
980	24.62	3.33		194.5	196.8	191.4		193		192.8	194.6	192.6		193.4	195.2	192		191.8	193.9	190
980	24.82	3.29		196.4	198.7	193.7		194.765		195	196.2	194.3		195.9	197	194.4		194.5	196.6	192.6
980	25.02	3.16		198.6	200.7	196.2		196.529		197.2	198.1	196.6		197.7	198.4	196.7		197.2	199	195
980	25.22	3.05		200.6	202.7	198.2		198.294		199.4	200	198.7		199.4	200	198.8		199.6	201.5	197.7
980	25.27	2.82		201	203.3	198.7		198.735		200	200.5	199.6		199.9	200.5	199.6		200.2	202	198.2
980	25.32	2.94		201.6	204	199.3		199.176		200.8	201.4	200.1		200.4	201.2	199.9		200.8	202.7	199
980	25.52	2.9		203.1	206.2	200.7		200.941		202.8	203.5	201.3		202.2	203.3	201		202.7	205.8	201.2
980	25.72	3.17		204.7	208	202		202.706		204.9	207.1	203.7		204.2	206.4	202.7		204.9	208.5	203.2
980	26.32	2.94		208.7	211.5	205.7		208		210.2	211.6	208.9		209.5	211	207.8		211	214.2	207.3
980	26.72	3.06		210.8	214.1	208.7		211.529		213.4	214.2	211.6		213.1	213.8	210.7		215.2	217.8	210.3
980	26.77	2.92		211.2	214.5	209.4		211.971		213.8	214.6	212.1		213.6	214.3	211		215.9	218.4	211
980	26.82	2.96		211.6	214.9	210		212.412		214.2	215	212.6		214	214.7	211.5		216.6	218.9	211.9
980	27.02	2.96		213.5	216.3	211.4		214.176		215.5	216.2	214.7		215.4	216.3	213.7		218.4	220.3	214.9
980	27.22	2.77		215.1	217.6	213.1		215.941		216.7	217	216.6		216.8	217.4	216.6		220.1	221.8	217.5
980	27.42	2.93		216.7	219.3	214.6		217.706		217.5	217.9	217.2		218.2	218.5	217.4		222	223.5	219.9
980	27.82	3.61		220	222.4	218.1		221.235		220.7	221.3	220.6		220.8	221.4	220.6		225.9	227.3	224.7
980	28.02	4.12		221.7	224.3	219.8		223		222.1	222.8	221.6		221.9	222.7	221.6		227.9	229.5	226.6
980	28.22	3.71		223.3	226	221.6		224.259		223.6	224.1	222.5		222.7	223.9	222.1		229.5	231.4	227.6
980	28.265	3.89		223.8	226.5	222.1		224.543		223.9	224.4	222.8		223	224.2	222.4		229.8	231.9	228.1
980	28.27	3.83		223.9	226.6	222.2		224.574		224	224.5	222.9		223	224.2	222.4		229.9	232.1	228.2
980	28.32	3.81		224.3	227	222.6		224.889		224.3	224.9	223.4		223.4	224.9	222.7		230.3	232.5	228.5
980	28.52	3.73		226.2	228.4	224.2		226.148		226.1	226.5	225		224.4	228.7	223.6		231.7	234.1	229.8
980	28.72	3.88		228	229.9	225.7		227.407		227.9	228.5	226.3		225.4	230	224.3		233	235.7	231.4
980	29.02	3.56		230.3	232.1	227.9		229.296		230.6	231.5	228.5		229	231.6	226.8		235.3	237	233.9
980	29.12	3.84		231.2	232.9	229		229.926		231.4	232.4	229.7		230.3	232.3	229.6		236.4	237.5	235.3
980	29.22	3.43		232.2	233.9	230.5		230.556		233.2	233.5	232.2		232.9	233.5	231.6		237.9	238.3	236.9
980	29.32	3		233.1	234.7	231.8		231.185		234.6	234.8	234.6		234.6	234.9	233.6		238.6	239	237.9
980	29.42	3.16		233.9	235.4	232.6		231.815		235.1	235.3	234.9		235.2	235.5	234.2		239.2	239.7	238.6
980	29.62	3.03		235.3	236.6	233.9		233.074		235.7	235.9	235.5		236	236.4	235.4		239.8	240.5	239.6
980	29.72	2.98		236.1	237.3	234.7		233.704		236.1	236.3	235.9		236.6	237	236.1		240.4	241.1	240
980	29.77	3.04		236.5	237.6	235.1		234.019		236.5	236.5	236.2		236.9	237.3	236.5		240.8	241.5	240.2
980	29.82	2.92		236.9	238	235.5		234.333		236.8	237	236.6		237.2	237.6	236.8		241.4	242.6	240.5
980	29.92	2.81		237.6	238.7	236.1		234.963		237.4	237.7	237		237.7	238.1	237.6		242.6	242.9	242.6
980	30.02	2.91		238.2	239.2	236.8		235.593		237.9	238.3	237.5		238.2	238.5	237.9		242.9	243.3	242.9
980	30.12	2.82		238.8	239.8	237.5		236.222		238.5	239	237.9		238.7	239	238.3		243.3	243.6	243.2
980	30.22	2.73		239.4	240.5	238.1		236.852		239	239.6	238.5		239.1	239.5	238.7		243.6	243.9	243.6
980	30.32	2.83		240.1	241.1	238.7		237.481		239.5	240.1	239		239.5	240	239.1		243.9	244.2	243.9
980	30.42	2.78		240.7	241.9	239.5		238.111		240	240.5	239.6		240.1	240.5	239.5		244.2	244.5	244.2
980	30.52	2.67		241.4	242.5	240.2		238.741		240.5	241	240.1		240.5	240.9	240.1		244.5	245	244.5
980	30.72	2.56		242.6	243.5	241.4		240		241.5	241.5	241.1		241.4	241.5	241.1		245.4	245.5	245.1
980	30.82	3.65		243.3	244.4	242.1		240.71		244.8	245.1	244.4		244.8	245.1	244.6		246.1	246.6	245.8
980	30.92	3.74		244	245.1	242.8		241.419		245.7	246.3	245.3		245.8	246.4	245.6		246.8	247.4	246.6
980	31.27	3.74		245.9	247.2	244.7		243.903		247.4	247.9	247.2		247.8	248.2	247.6		248.4	249.3	247.7
980	31.32	4		246.2	247.6	245		244.257		247.7	248.2	247.6		248.2	248.5	247.8		248.7	249.5	247.9
980	31.42	3.69		246.9	248.3	245.7		244.967		248.4	248.8	248		248.8	249.2	248.3		249.4	250.3	248.6
980	31.63	3.75		248.2	249.6	247		246.457		249.3	249.5	249		250	250.5	249.5		250.6	251.5	249.9
980	31.73	4.02		248.9	250.2	247.7		247.167		250	250.3	249.6		250.7	251.1	250.4		251.5	252.7	250.6
980	31.83	4		249.5	251	248.5		247.876		250.6	251	250.2		251.3	251.7	250.9		252.3	253.8	251.3
980	31.93	4.06		250.3	251.9	249.1		248.586		251.2	251.6	250.8		251.8	252.3	251.4		253.2	255	251.9
980	32.03	4.08		251	252.8	249.9		249.295		251.8	252.1	251.4		252.4	252.9	252		254	256	252.6
980	32.13	4.17		251.6	253.4	250.7		250.005		252.4	252.5	251.9		253	253.5	252.6		255	256.9	253.3
980	32.33	4.11		253	255.1	252.2		251.424		253.2	253.6	252.7		253.5	256.6	253.3		257	258.4	254.9
980	32.43	4		253.7	256.1	253		252.134		253.8	254.1	253.3		254.6	257.6	253.9		258	259.2	255.8
980	32.53	4.07		254.3	257	253.8		252.843		254.4	254.5	253.9		255.7	258.5	254.5		259	260.1	256.6
980	32.63	3.51		255	257.7	254.6		253.553		255	255.4	254.6		256.4	259.9	255.6		259.8	261	257.3
980	33.63	4		258.8	261.1	257.2		260.649		258.8	260.8	257.3		261.9	262.4	260.1		263	264.9	260.9
980	33.73	3.97		259.5	261.7	257.9		261.358		259.6	261.5	258		262.5	263	261		263.7	265.6	261.4
980	33.83	3.95		260.3	262.5	258.6		262.068		260.9	262.4	259		263.2	263.6	262.3		264.4	266.4	262.1
980	33.93	3.9		261.2	263.4	259.2		262.777		262.1	263.5	260.2		263.8	264.3	263.2		265.1	267.1	262.7
980	34.03	3.87		262.3	264.4	259.9		263.487		263.3	264.6	261.7		264.5	264.9	264.2		266	268	263.4
980	34.08	3.65		262.8	264.9	260.2		263.842		263.8	265	262.3		264.8	265.2	264.6		266.4	268.5	263.7
980	34.13	3.78		263.5	265.5	260.7		264.196		264.4	265.5	262.9		265.2	265.5	264.8		267	269.2	264.2
980	34.33	3.93		265.2	267	262		265.616		265.9	267	264.8		266.4	267.1	265.7		269.2	271.7	265.6
980	34.68	3.6		267.8	268.5	264.1		268.099		267.9	268.5	267.6		268.1	268.5	267.6		272.8	274.5	267.4
980	35.08	4.04		270.3	271.7	266.5		270.937		269.5	270.8	268.8		270	270.8	269		275.1	277	270.5
980	35.48	3.96		273.1	274.3	269.1		273.776		271.4	272.5	270.2		272.3	273.1	271		277.5	279	274.2
980	35.68	3.86		274.6	275.5	270.7		275.195		273.3	274.9	271.4		273.9	274.4	272.9		279	280.2	276.9
980	35.73	3.73		275	275.9	271.2		275.55		273.9	275.3	271.7		274.5	275	273.8		279.3	280.5	277.5
980	35.78	3.58		275.5	276.3	271.7		275.904		274.6	275.8	272.2		274.8	275.4	274.6		279.7	281	278
980	35.98	3.8		276.7	277.6	273		277.323		275.4	276.6	273.6		275.9	276.7	275.4		280.7	282	279.2
980	36.18	3.88		277.8	278.9	274.4		278.743		276.6	277.3	274.9		276.8	277.5	276.4		281.8	283.1	280.4
980	36.38	3.86		279	280.2	275.8		280.162		277.3	278.3	276.6		277.5	278.5	277.2		282.9	284.2	281.5
980	36.58	3.78		280.2	281.4	277.6		281.581		278.3	279.3	277.6		279	279.5	278.1		284.1	285.3	282.8
980	36.78	3.43		281.4	282.7	279.5		283		279.7	280.3	278.8		280.4	281	279.4		285.4	286.7	284.2
980	36.98	3.54		282.6	284	281.1		284.531		280.5	281.4	280.1		281.5	282.3	280.7		286.6	287.8	285.6
980	37.18	3.38		283.9	285.2	282.6		286.063		282	282.3	281.6		283	283.3	282.2		287.8	289	286.9
980	37.23	3.43		284.4	285.6	283		286.446		282.4	282.7	282.1		283.3	283.5	282.6		288.1	289.4	287.3
980	37.28	3.25		284.8	286	283.4		286.828		282.7	283.3	282.6		283.7	284.1	283		288.5	289.9	287.7
980	37.48	3.33		286.1	287.5	284.6		288.36		284	284.8	283.3		284.8	285.5	284.2		289.9	291.1	289.1
980	37.68	3.29		287.5	288.8	285.8		289.891		285.3	286.3	284.4		286	286.7	285.2		291.2	292.3	290.6
980	37.88	3.23		288.9	290.1	287.3		291.423		286.9	287.5	285.8		287.3	287.5	286.4		292.6	293.4	291.6
980	38.08	3.58		290.2	291.5	288.7		292.954		288.9	290.2	287.7		288.8	289.3	287.8		293.9	294.6	292.9
980	38.28	3.53		291.5	292.7	290.2		294.485		290.7	291.4	289.6		290.1	291.1	289.2		295.2	296.1	294.2
980	38.48	4.09		293	294.1	291.8		296.017		292.2	292.5	291.7		291.8	292.8	291.6		296.9	298.5	295.7
980	38.68	3.92		294.5	295.8	293.2		297.548		293.7	293.9	293.5		293.2	293.9	292.6		298.4	301.9	297
980	38.73	3.86		294.9	296.5	293.6		297.931		294	294.3	293.8		293.5	294.1	292.9		298.9	302.4	297.5
980	38.78	3.9		295.3	296.8	294		298.314		294.3	294.5	294		294	294.5	293.2		299.4	302.8	298
980	38.98	3.84		296.7	298.1	295.3		299.845		295.4	296.7	294.9		295.4	296.2	294.4		302.1	304.3	300.1
980	39.18	3.73		298.1	299.4	296.6		301.377		296.8	297.5	296.1		296.7	297.4	295.9		304.4	305.9	302.5
980	39.38	3.52		299.4	300.7	297.9		302.908		298.2	298.5	297.6		298	298.9	297.6		306	307.2	304.6
980	39.58	3.52		300.7	302.1	299.3		304.44		299.6	300	298.3		299.2	300.1	298.6		307.4	308.5	306
980	39.78	3.43		302	303.3	300.6		305.971		300.4	301.2	299.6		300.4	301.2	299.7		308.8	309.8	307.6
980	39.98	3.44		303.2	304.5	301.8		307.502		301.5	302.1	300.8		301.5	302.2	300.8		310.1	310.9	309
980	40.18	3.29		304.5	305.8	303		309.034		302.6	302.9	302		302.7	303.2	302		311.3	311.9	310.3
980	40.23	3.32		304.9	306.1	303.4		309.417		303	303.2	302.3		303	303.5	302.4		311.7	312.2	310.7
980	40.28	3.24		305.3	306.5	303.8		309.799		303.3	303.5	302.7		303.3	303.8	302.7		312.1	312.5	311.1
980	40.48	3.48		306.5	307.8	305		311.331		304.2	304.7	303.6		304.5	305	303.5		313.2	313.5	312.1
980	40.68	3.6		307.7	309.1	306.2		312.862		305.2	305.7	304.6		305.5	305.9	304.7		314.6	315.1	313.2
980	40.88	3.53		308.9	310.5	307.6		314.394		306.2	306.5	305.6		306.3	306.5	305.6		315.6	316.4	314.6
980	41.08	3.45		310.2	312.1	308.9		315.925		307.3	307.5	306.7		307.3	307.5	306.7		316.5	317.5	315.7
980	41.28	3.24		311.5	313.8	310.3		317.456		308.9	310.2	308.1		308.7	310.1	307.8		317.8	319.1	316.9
980	41.41	3.16		312.7	315	311.2		318.452		310.7	312.4	309.4		310	311.9	308.7		318.8	320.1	317.7
980	41.61	3.05		314.5	317	312.6		319.983		313.3	315.4	311.2		312.6	314.1	309.7		320.3	321.7	318.8
980	41.66	3.31		315	317.5	313		320.366		314	315.8	311.8		313.1	314.5	310.1		320.6	322.1	319
980	41.71	3.08		315.7	318.2	313.6		320.749		314.9	316.4	312.6		313.6	315.2	310.6		321.1	322.6	319.5
980	41.91	3.21		317.4	319.8	315.2		322.28		317.8	318.5	314.5		315.3	317.4	312.3		322.5	324	320.7
980	42.11	3.06		319.2	321.1	316.9		323.812		319.8	320.5	316.5		317.8	319.1	314.8		323.5	325.3	322.1
980	42.31	2.99		321	322.5	318.7		325.343		321.6	322.4	320.3		319.8	321	317.9		325.2	327.2	324.6
980	42.51	2.84		322.6	324.2	321.2		326.874		323.2	323.5	322.6		322.2	323.4	320.9		326.9	329	325.7
980	42.61	2.66		323.4	325.1	322.6		327.64		324.1	324.5	323.6		323.7	325.1	322.6		328	330.1	326.4
980	42.71	2.75		324.3	325.9	323.5		328.406		325	325.5	324.6		324.9	326.4	323.5		329.2	330.9	327.2
980	42.81	2.54		325.1	326.7	324.4		329.172		325.9	326.8	325.6		326.5	328.1	324.6		330.6	332.2	328.2
980	42.91	2.68		325.8	327.4	325		329.937		326.6	327.9	326.1		327.4	329.6	325.6		331.7	333.3	329.2
980	43.01	2.56		326.5	328.2	325.7		330.703		327.4	328.9	326.7		328.4	330.9	326.6		332.8	334.2	330.2
980	43.11	2.63		327.1	328.9	326.3		331.469		328.2	330.1	327.4		329.7	332	327.5		334.2	335.1	331.1
980	43.16	2.61		327.5	329.4	326.7		331.851		328.8	330.8	327.9		330.3	332.5	328		334.9	335.6	331.8
980	43.21	2.61		328	329.9	327		332.234		329.3	331.4	328.3		331.4	332.9	328.7		335.3	336	332.2
980	43.31	2.63		328.9	330.7	327.7		333		330.8	332.8	329.3		332.8	333.5	330		336	336.5	333.4
980	43.61	3.39		330.7	332.4	329.9		334.846		335.6	336.1	334.6		335.7	336.1	334.7		337.8	338.2	337.6
980	43.81	4.04		332.3	333.5	331.6		336.077		336.7	337	336.6		336.6	336.8	335.7		338.7	339	338.6
980	44.11	3.25		334.5	335.3	333.2		337.923		337.6	337.8	337.3		337.4	337.5	336.4		339.5	340	339.3
980	44.21	3.14		335.2	336	334		338.538		338	338.2	337.7		337.9	338.2	337		340	340.5	339.7
980	44.31	3.27		335.9	336.6	334.9		339.154		338.5	338.5	338.3		338.5	338.5	337.5		340.5	341.5	340.3
980	44.41	4.23		336.7	337.4	335.8		339.769		339.8	340.6	339.6		339.8	340.2	339.6		342.9	343.8	342.6
980	44.51	4.45		337.4	338.2	336.6		340.385		340.6	341	340.6		340.6	340.8	340.6		343.9	344.6	343.6
980	44.61	4.58		338.2	339	337.3		341		341.1	341.5	340.9		341	341.4	340.9		344.6	345	344.2
980	44.71	4.4		338.8	339.7	338		341.636		341.5	341.9	341.2		341.5	342	341.3		345	345.4	344.6
980	44.81	4.42		339.5	340.3	338.8		342.272		342.1	342.3	341.7		342	342.6	341.8		345.6	345.7	345
980	44.91	4.57		340.1	341	339.4		342.908		342.6	342.7	342.1		342.6	342.9	342.6		345.9	346.1	345.6
980	45.01	4.52		340.8	341.6	340		343.543		342.9	343.1	342.6		342.9	343.3	342.9		346.3	346.4	345.9
980	45.04	4.54		341	341.8	340.2		343.734		343	343.3	342.8		343.1	343.5	343		346.5	346.5	346
980	45.24	4.61		342	342.9	341.1		345.006		343.5	343.8	343.3		343.6	344	343.5		349.7	350.4	346.5
980	45.44	4.18		343	343.9	342		346.277		344	344.4	343.8		344.2	344.6	344		351.2	354.1	347.2
980	45.64	4.3		344.1	345	343.1		347.549		344.5	344.9	344.3		344.7	345.1	344.5		352.6	356.5	348.6
980	45.84	4.33		345.1	345.9	344.1		348.821		345.1	345.5	344.9		345.3	345.6	345		353.8	358	349.6
980	45.89	4.18		345.4	346.3	344.4		349.139		345.3	345.7	345.1		345.5	345.8	345.2		354.1	358.5	349.9
980	45.94	4.27		345.8	346.6	344.8		349.457		345.5	346	345.4		345.8	346	345.4		354.5	359	350.3
980	46.14	4.3		346.8	347.6	345.8		350.728		346.3	346.5	346		346.4	346.6	346		355.8	360.1	351.2
980	46.34	3.88		347.8	348.5	346.7		352		347	347.4	346.6		347	347.4	346.6		357.1	361.3	352.3
980	46.54	4.03		348.8	349.6	347.3		353.508		347.6	348	347.2		347.7	348	347.3		358.6	362.5	353.7
980	46.74	3.88		349.7	350.5	348.1		355.016		348.4	348.5	347.9		348.4	348.5	348		360.2	363.5	355.5
980	46.94	4.08		350.6	351.5	349		356.524		349.1	349.4	348.8		349.2	349.6	348.8		361.7	364.6	357.3
980	46.99	4.05		350.9	351.9	349.3		356.901		349.4	349.7	349.2		349.5	350	349.2		362.2	365	357.8
980	47.02	4.18		351.2	352.2	349.6		357.127		349.6	349.9	349.4		349.8	350.2	349.5		362.6	365.3	358.2
980	47.07	4.08		351.5	352.6	350		357.504		349.9	350.2	349.6		350.1	350.4	349.8		363.1	365.7	358.7
980	47.12	4.09		351.9	353.1	350.5		357.882		350.2	350.5	349.9		350.4	350.8	350.1		363.7	366.2	359.3
980	47.14	3.99		352.2	353.3	350.7		358.032		350.3	350.6	350		350.6	350.9	350.3		363.9	366.4	359.6
980	47.17	3.97		352.4	353.5	351		358.259		350.4	350.7	350.2		350.9	351.2	350.6		364.2	366.6	359.9
980	47.19	4.12		352.6	353.7	351.2		358.409		350.5	350.8	350.3		351	351.3	350.8		364.4	366.8	360.1
980	47.22	3.93		352.8	354.1	351.5		358.636		350.7	351	350.4		351.2	351.5	350.9		364.8	367.1	360.5
980	47.27	4.02		353.1	354.7	352.1		359.013		351	351.2	350.8		351.5	351.8	351.2		365.3	367.5	361.2
980	47.35	4.13		353.6	355.5	352.8		359.616		351.3	351.5	351.1		351.9	352.2	351.6		366.1	368.1	362.4
980	47.37	4.11		353.8	355.7	353.1		359.767		351.4	351.5	351.2		352	352.2	351.7		366.3	368.2	362.6
980	47.44	3.28		354.4	356.2	353.8		360.294		351.7	351.8	351.6		352.4	352.5	352.1		366.9	368.7	363.6
980	47.47	3.93		354.8	356.5	354.1		360.521		351.8	352	351.7		352.7	352.9	352.3		367.2	369	364
980	47.49	3.88		355	356.7	354.3		360.671		351.9	352.1	351.7		352.7	352.9	352.4		367.3	369.1	364.3
980	47.62	4.06		356.4	357.5	355.3		361.652		352.2	352.4	352.1		353.7	354.1	353.2		368.2	369.7	366.3
980	47.64	3.87		356.5	357.5	355.4		361.803		352.2	352.4	352.1		353.9	354.3	353.4		368.2	369.7	366.4
980	47.67	3.88		356.9	357.8	355.7		362.029		352.4	352.5	352.3		354.2	354.4	353.6		368.5	369.9	366.8
980	47.69	4.13		357.1	358	355.9		362.18		352.5	352.5	352.4		354.4	354.5	353.8		368.6	370.1	367.1
980	47.72	3.83		357.5	358.3	356.3		362.406		352.7	352.9	352.6		354.9	355.4	354.1		368.9	370.3	367.5
980	47.77	4.02		357.9	358.6	356.7		362.783		353	353.2	352.9		355.6	355.9	354.5		369.3	370.7	368.1
980	47.82	3.93		358.5	359.2	357.3		363.16		353.4	353.6	353.3		356.1	356.4	355.5		369.8	371.1	368.8
980	47.84	3.62		358.7	359.5	357.5		363.311		353.6	353.8	353.6		356.2	356.5	355.6		369.9	371.2	369
980	47.87	3.77		359.1	359.8	357.7		363.537		353.9	354.1	353.7		356.5	356.8	355.9		370.3	371.5	369.3
980	47.89	3.84		359.2	359.9	357.9		363.688		354	354.2	353.7		356.7	357.1	356.1		370.3	371.6	369.4
980	47.92	3.83		359.6	360.2	358.3		363.914		354.2	354.5	353.9		357	357.6	356.4		370.6	371.8	369.7
980	47.97	3.79		360	360.7	359		364.291		354.5	355.6	354.2		357.5	358.1	356.9		371.1	372.2	370.1
980	48.02	3.87		360.4	361.1	359.6		364.668		355.6	355.9	354.4		358.5	358.8	357.5		371.5	372.6	370.5
980	48.04	3.76		360.6	361.3	359.9		364.819		355.8	356	354.5		358.6	358.9	357.5		371.7	372.8	370.7
980	48.07	3.81		361	361.6	360.3		365.045		356	356.3	355.6		359	359.2	358.6		372	373.1	371
980	48.09	3.72		361.2	361.8	360.5		365.196		356.1	356.4	355.8		359.2	359.3	358.8		372.2	373.3	371.2
980	48.12	3.7		361.4	362	360.7		365.422		356.2	356.5	355.9		359.4	359.5	359		372.4	373.4	371.5
980	48.17	3.69		361.9	362.4	361.2		365.799		356.5	357	356.3		360.7	361.2	359.4		372.9	373.8	372
980	48.22	4.1		362.4	362.9	361.7		366.176		356.9	357.5	356.6		361.4	362	360		373.4	374.2	372.5
980	48.24	3.9		362.5	363	361.8		366.327		357	357.5	356.7		361.8	362.3	360.4		373.5	374.3	372.6
980	48.27	4.05		362.8	363.2	362.1		366.553		357.3	358.3	357		362.6	363	360.9		373.8	374.6	372.9
980	48.29	4.13		363	363.4	362.3		366.704		357.5	358.7	357.2		362.9	363.3	361.2		374	374.8	373.1
980	48.32	4.06		363.2	363.7	362.6		366.93		358	359.2	357.6		363.3	363.5	361.5		374.3	375	373.4
980	48.42	4		364.1	364.4	363.4		367.684		359.2	361.2	358.7		365.4	366.1	364.9		375	375.8	374.2
980	48.44	3.46		364.3	364.5	363.7		367.835		359.5	361.5	359.3		365.8	366.5	365.6		375.2	376	374.4
980	48.47	3.96		364.6	364.9	364.1		368.061		360.7	362.5	360.4		366.4	367.2	366		375.5	376.3	374.7
980	48.52	3.89		365	365.4	364.6		368.438		362.2	363.5	362		367.3	368	366.6		375.9	376.8	375
980	48.57	3.91		365.5	366.1	365.1		368.815		364.1	365.3	364		368.2	369	367.6		376.3	377.3	375.3
980	48.62	3.38		366.1	366.5	365.6		369.192		365.6	366.3	365.6		369.8	370.4	369.6		376.7	377.7	375.7
980	48.64	3.73		366.4	367	365.9		369.343		366.1	366.7	365.8		370.1	370.8	369.8		376.8	377.9	375.9
[truncated: 1,340 more rows]
