# Supplementary material for: Evaluating manual versus automated benthic foraminiferal δ 18 O alignment techniques for developing chronostratigraphies in marine sediment records
Source: Copernicus journal article supplement (doi:10.5194/egusphere-2023-2906), 2023-12-19
Supplement: Supplementary file 2 [file egusphere-2023-2906-supplement.zip]

Archive with 2 entries (2 files):
- HMM_match_SupplementalTables.xlsx
- U1541_d18O_age_model_SUpplement_1204023.pdf
